# Supplementary material for: Clinical efficacy of prebiotics and glycosaminoglycans versus placebo In dogs with food responsive enteropathy receiving a hydrolyzed diet: A pilot study
Source: PubMed Central journal article supplement (PMC8530283; doi:10.1371/journal.pone.0250681), 2021-10-21

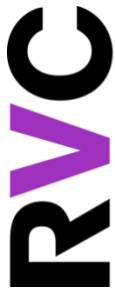

Royal Veterinary College  
University of London

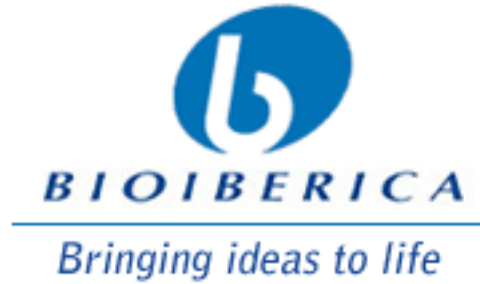

## Final Study Report

Study Number: CIC-15-BIO

**Study Title: A study investigating the efficacy of BIOEC2015 in reducing the clinical signs associated with canine inflammatory bowel disease (IBD)**

**Sponsor:**

BIOIBERICA S.A.U.  
Plaza Francesc Macià, 7  
08029 Barcelona  
SPAIN

**Study Performed By:**

Queen Mother Hospital for Animals  
Clinical Investigation Centre  
Royal Veterinary College  
Hawkshead Lane  
North Mymms  
Hatfield  
Hertfordshire, AL9 7TA  
United Kingdom

**Period of Investigation (Animal Phase):**

September 2015 to April 2018

## Contents

|        |                                                            |    |
|--------|------------------------------------------------------------|----|
| 1.     | ABBREVIATIONS .....                                        | 6  |
| 2.     | STATEMENTS OF APPROVAL AND COMPLIANCE.....                 | 8  |
| 2.1.   | Investigator .....                                         | 8  |
| 2.2.   | Sponsor Representative.....                                | 9  |
| 2.3.   | Monitor .....                                              | 10 |
| 3.     | STUDY PERSONNEL AND SITES .....                            | 11 |
| 3.1.   | Key Personnel .....                                        | 11 |
| 3.2.   | Study Sites.....                                           | 13 |
| 4.     | INTRODUCTION.....                                          | 14 |
| 4.1.   | Study Identifier .....                                     | 14 |
| 4.2.   | Objective.....                                             | 14 |
| 4.3.   | Background .....                                           | 14 |
| 4.4.   | Key Dates .....                                            | 14 |
| 5.     | MATERIALS AND METHODS.....                                 | 15 |
| 5.1.   | Study Sites.....                                           | 15 |
| 5.2.   | Test Animals.....                                          | 15 |
| 5.3.   | Housing of Animals .....                                   | 15 |
| 5.4.   | Feed and Water .....                                       | 15 |
| 5.5.   | Animal Inclusion and Exclusion Criteria.....               | 16 |
| 5.5.1. | Inclusion Criteria .....                                   | 16 |
| 5.5.2. | Exclusion Criteria .....                                   | 16 |
| 5.6.   | Post – Inclusion Removals .....                            | 17 |
| 5.7.   | Animal Fate .....                                          | 17 |
| 5.8.   | Concomitant Treatments.....                                | 17 |
| 5.9.   | Investigational Veterinary Product (IVP) and placebo ..... | 17 |
| 5.9.1. | Investigational Veterinary Product.....                    | 17 |
| 5.9.2. | Placebo.....                                               | 18 |
| 5.9.3. | Supply and Storage of IVP.....                             | 19 |
| 5.10.  | IVP Use and Fate .....                                     | 20 |
| 5.11.  | Randomisation and blinding.....                            | 20 |
| 5.12.  | Sample fate .....                                          | 21 |

---

|        |                                                    |    |
|--------|----------------------------------------------------|----|
| 6.     | EXPERIMENTAL DESIGN .....                          | 21 |
| 6.1.   | Study Schedule.....                                | 21 |
| 7.     | OBSERVATIONS AND MEASUREMENTS.....                 | 21 |
| 7.1.   | Physical Examination .....                         | 21 |
| 7.2.   | CCECAI and CIBDAI.....                             | 22 |
| 7.3.   | Diagnostic samples: blood, urine and faeces .....  | 22 |
| 7.3.1. | Blood samples.....                                 | 22 |
| 7.3.2. | Biochemistry profile.....                          | 22 |
| 7.3.3. | Haematology profile .....                          | 22 |
| 7.3.4. | Urine sample .....                                 | 23 |
| 7.3.5. | Faecal sample.....                                 | 23 |
| 7.4.   | Ultrasound .....                                   | 23 |
| 7.5.   | Endoscopy.....                                     | 23 |
| 7.5.1. | Procedure.....                                     | 23 |
| 7.5.2. | Histological scoring of biopsies.....              | 23 |
| 7.6.   | Adverse Events.....                                | 23 |
| 7.7.   | Efficacy Assessments .....                         | 24 |
| 7.8.   | Study End Points .....                             | 24 |
| 8.     | RECORDS AND REPORTS .....                          | 24 |
| 8.1.   | Record Storage and Archiving .....                 | 24 |
| 8.2.   | Protocol Amendments.....                           | 25 |
| 8.3.   | Protocol Deviations.....                           | 26 |
| 8.4.   | Preparation of the Investigator Study Report ..... | 26 |
| 8.5.   | Data Handling .....                                | 26 |
| 9.     | DATA ANALYSIS .....                                | 26 |
| 9.1    | Statistical Analysis:.....                         | 26 |
| 9.2    | Data exclusions: .....                             | 26 |
| 10.    | RESULTS .....                                      | 26 |
| 10.1   | Study Population.....                              | 26 |
| 10.2   | Evaluation of Efficacy.....                        | 27 |
| 11.    | DISCUSSION .....                                   | 27 |
| 12.    | CONCLUSIONS.....                                   | 27 |
| 13.    | REFERENCES.....                                    | 28 |

|     |                                                                                     |     |
|-----|-------------------------------------------------------------------------------------|-----|
| 14. | APPENDICES .....                                                                    | 28  |
|     | APPENDIX 1 .....                                                                    | 29  |
|     | TABLE A1. Group 1 Signalment and enrolment data.....                                | 29  |
|     | TABLE A2. Group 2 Signalment and enrolment data.....                                | 30  |
|     | TABLE A3. Patient history. ....                                                     | 31  |
|     | TABLE A4. Completion and withdrawal. ....                                           | 35  |
|     | TABLE A5. Biochemistry results. ....                                                | 37  |
|     | TABLE A6. Biochemistry - laboratory and investigator comments.....                  | 42  |
|     | TABLE A7. Albumin results for both treatment groups. ....                           | 47  |
|     | TABLE A8. Folate results for both treatment groups. ....                            | 49  |
|     | TABLE A9. Cobalamin results for both treatment groups. ....                         | 51  |
|     | TABLE A10. Screening blood tests .....                                              | 53  |
|     | TABLE A11. Haematology results for treatment group 1. ....                          | 55  |
|     | TABLE A12. Laboratory and investigator comments on haematology results group 1..... | 58  |
|     | TABLE A13. Haematology results for treatment group 2. ....                          | 61  |
|     | TABLE A14. Laboratory and investigator comments on haematology results group 2..... | 64  |
|     | TABLE A15. Urinalysis Group 1. ....                                                 | 67  |
|     | TABLE A16. Urinalysis Group 2 .....                                                 | 71  |
|     | TABLE A17. Faecal tests. ....                                                       | 74  |
|     | TABLE A18. IBD Physical exam. ....                                                  | 76  |
|     | TABLE A19. Drinking. ....                                                           | 80  |
|     | TABLE A20. Diet. ....                                                               | 81  |
|     | TABLE A21. General physical exam.....                                               | 86  |
|     | TABLE A22. CCECAI Scores. ....                                                      | 92  |
|     | TABLE A23. CIBDAI scores. ....                                                      | 99  |
|     | TABLE A24. WSAVA scores, stomach fundus.....                                        | 106 |
|     | TABLE A25. WSAVA scores – Stomach antrum.....                                       | 108 |
|     | TABLE A26. WSAVA scores – duodenum. ....                                            | 110 |
|     | TABLE A27. WSAVA score - ilium. ....                                                | 112 |
|     | TABLE A28. WSAVA score – colon .....                                                | 114 |
|     | TABLE A29. UGI Part 1 Equipment used and sampling type. ....                        | 116 |
|     | TABLE A30. UGI Part 1 oesophageal lesion code.....                                  | 119 |
|     | TABLE A31. UGI part 1 Stomach lesion code. ....                                     | 121 |

|                                                                                                                                                      |     |
|------------------------------------------------------------------------------------------------------------------------------------------------------|-----|
| TABLE A32. UGI part 1- Duodenum lesion code. ....                                                                                                    | 123 |
| TABLE A33. UGI part 2 stomach lesion code. ....                                                                                                      | 126 |
| TABLE A34. UGI part 2 Duodenum lesion code. ....                                                                                                     | 129 |
| TABLE A35. LGI part 1 equipment and sampling. ....                                                                                                   | 132 |
| TABLE A36. LGI part 1. ....                                                                                                                          | 138 |
| TABLE A37. LGI Part 2. ....                                                                                                                          | 140 |
| TABLE A38. LGI part 2 cecum.....                                                                                                                     | 143 |
| TABLE A39. Deviations. ....                                                                                                                          | 145 |
| TABLE A40. Concomitant medication - Group 1. ....                                                                                                    | 152 |
| TABLE A41. Concomitant medication - Group 2. ....                                                                                                    | 157 |
| TABLE A42. Adverse Events .....                                                                                                                      | 161 |
| TABLE A43. Adverse Events - treatment.....                                                                                                           | 164 |
| TABLE A44. Clinical pathology results - Group 1. ....                                                                                                | 166 |
| TABLE A45. Clinical pathology results - Group 1. Diagnosis and comments. ....                                                                        | 181 |
| TABLE A46. Clinical pathology results -Group 2. ....                                                                                                 | 190 |
| TABLE A47. Clinical pathology results - Group 2. Diagnosis and comments. ....                                                                        | 200 |
| APPENDIX 2.....                                                                                                                                      | 206 |
| Table 1. Descriptive statistics of demographic variables (Group, Age, Gender, and Breed) with data summary after withdrawals within parentheses..... | 206 |
| Figure 1. Group comparison of average ( $\pm$ sd) CCECAI and CIBDAI profiles .....                                                                   | 208 |
| Figure 2. Group comparison of average ( $\pm$ sd) profiles for blood samples .....                                                                   | 209 |
| Figure 3. Group comparison of average ( $\pm$ sd) Endoscopy Score D, I, C profiles .....                                                             | 210 |
| Figure 4. Group comparison of average ( $\pm$ sd) profiles for WSAVA scores .....                                                                    | 211 |
| Figure 5. Pearson correlation coefficients (combining all the visits and groups 1 and 2) using <i>corrplot</i> package in R. ....                    | 212 |

## 1. ABBREVIATIONS

|        |                                                    |
|--------|----------------------------------------------------|
| ACTH   | Adrenocorticotrophic hormone                       |
| AE     | Adverse event                                      |
| ALP    | Alkaline phosphatase                               |
| ALT    | Alanine aminotransferase                           |
| BCS    | Body Condition Score                               |
| CCECAI | Canine Chronic Enteropathy Clinical Activity Index |
| CIBDAI | Canine IBD Activity Index                          |
| CIC    | Clinical Investigations Centre                     |
| CK     | Creatine kinase                                    |
| cPLI   | Canine pancreatic lipase immunoreactivity          |
| DOB    | Date of birth                                      |
| GCP    | Good Clinical Practice                             |
| HCT    | Hematocrit                                         |
| HGB    | Haemoglobin                                        |
| IBD    | Inflammatory bowel disease                         |
| IVP    | Investigational veterinary product                 |
| LGI    | Lower gastrointestinal                             |
| MCH    | Mean cell haemoglobin                              |
| MCHC   | Mean corpuscular haemoglobin concentration         |
| MCV    | Mean corpuscular volume                            |
| NTF    | Note to file                                       |
| PLT    | Platelet count                                     |
| QMHA   | Queen Mother Hospital for Animals                  |
| NSAID  | Non-steroidal anti-inflammatory drug               |
| RDW    | Red blood cell distribution width                  |
| RTAP   | Random treatment allocation plan                   |
| RVC    | Royal Veterinary College                           |

|       |                                           |
|-------|-------------------------------------------|
| SID   | Once daily                                |
| SOP   | Standard operating procedure              |
| TLI   | Trypsin-like Immunoreactivity test        |
| RBC   | Red blood cell count                      |
| UGI   | Upper gastrointestinal                    |
| V1    | Visit 1                                   |
| V2    | Visit 2                                   |
| V3    | Visit 3                                   |
| V4    | Visit 4                                   |
| V5    | Visit 5                                   |
| V6    | Visit 6                                   |
| V7    | Visit 7                                   |
| WBC   | White blood cell count                    |
| WSAVA | World Small Animal Veterinary Association |

## 2. STATEMENTS OF APPROVAL AND COMPLIANCE

### 2.1. Investigator

Work conducted at the RVC was performed according to the VICH GL9 (GCP). This included conduct of the in-life phase and associated raw data collection.

All RVC generated study documentation was provided to the report authors and represents an accurate and record of the study.

No claim of compliance is made for work undertaken at Iowa State University this includes statistical analysis, and any results and conclusions drawn from them.

|                                                           |       |
|-----------------------------------------------------------|-------|
| _____                                                     | _____ |
| Dr. Barbara Glanemann Dipl ECVIM-CA, PGCvetEd FHEA, MRCVS | Date  |
| <i>Lead Investigator</i>                                  |       |

|                                                   |       |
|---------------------------------------------------|-------|
| _____                                             | _____ |
| Prof Karin Allenspach Dr med vet FVH ECVIM-CA PhD | Date  |
| <i>Co-Investigator</i>                            |       |



## 2.2. Sponsor Representative

As Sponsor for this study I confirm that I approve the content and format of this report as being appropriate for reporting the conduct of this study by the Investigator of this study.

---

Sergi Segarra DVM MSc PhD

*Sponsor Representative*

---

Date

### 2.3. Monitor

This study has been monitored according to RVC Standard Operating Procedures. The Sponsor was advised on the progress of the study by the Monitor following periodic inspection of various phases. The dates of monitoring visits and the phases inspected are given below:

| Date of Inspection | Phase                  |
|--------------------|------------------------|
| 23Sep15            | Pre-study/study set-up |
| 15Mar16            | Interim/in-phase       |
| 15Nov16-17Nov16    | Interim/in-phase       |
| 24Jan19            | Closeout               |

Work at the RVC was conducted in compliance with the Protocol, Protocol Amendments and relevant Standard Operating Procedures.

The report describes accurately the methods and procedures used for data collection.

Verification of results and conclusions has not been undertaken and VICH GL9 (GCP) compliance is not claimed for this part of the work.

---

Mrs Linda Slater DipAVN(surg) RVN MRQA

---

Date

*Monitor*

### 3. STUDY PERSONNEL AND SITES

#### 3.1. Key Personnel

|                      |                                                                                                                                                                             |
|----------------------|-----------------------------------------------------------------------------------------------------------------------------------------------------------------------------|
| Sponsor              | Sergi Segarra<br>R&D Project Leader Animal Health<br>R&D Department<br>BIOIBERICA S.A.U.<br>Plaza Francesc Macià, 7<br>08029 Barcelona<br>SPAIN                             |
| Lead Investigator    | Barbara Glanemann<br>Queen Mother Hospital for Animals<br>Royal Veterinary College<br>Hawkshead Lane<br>North Mymms<br>Hatfield<br>Hertfordshire, AL9 7TA<br>United Kingdom |
| Co-Lead Investigator | Karin Allenspach<br>Professor of Internal Medicine<br>1452 Vet Med<br>1800 Christensen Drive<br>Ames, IA 50011-1134<br>USA                                                  |
| Monitor              | Linda Slater<br>Clinical Investigations Centre<br>Royal Veterinary College                                                                                                  |

Hawkshead Lane  
North Mymms  
Hatfield  
Hertfordshire, AL9 7TA  
United Kingdom

Co-Study Report Author

Linda Slater  
Clinical Investigations Centre  
Royal Veterinary College  
Hawkshead Lane  
North Mymms  
Hatfield  
Hertfordshire, AL9 7TA  
United Kingdom

Co-Study Report Author

Karin Allenspach  
Professor of Internal Medicine  
1452 Vet Med  
1800 Christensen Drive  
Ames, IA 50011-1134  
USA

Statisticians

Yeon-Jung Seo, BSC MS PhD  
Post-doctoral research associate  
Biomedical Sciences  
Iowa State University  
Ames  
IA  
USA

Jonathan P. Mochel, DVM, MS, PhD, DECVPT  
Associate Professor of Pharmacology and  
mathematical modelling  
Biomedical Sciences  
Iowa State University  
Ames  
IA  
USA

### 3.2. Study Sites

The study was conducted at:

Queen Mother Hospital for Animals (QMHA)  
Royal Veterinary College  
Hawkshead Lane  
North Mymms  
Hatfield  
Hertfordshire  
AL9 7TA  
UK

Data was collected according to the study protocol and VICH GL9 (GCP).

The study was performed under the Animals (Scientific Procedures) Act 1986, PPL number: 70/7393.

Statistical analysis was performed at:

Biomedical Sciences  
Iowa State University  
Ames  
IA  
USA

Compliance with VICH GL9 (GCP) is not claimed for this work or any results or conclusions drawn from it.

## 4. INTRODUCTION

### 4.1. Study Identifier

Study Number: CIC-15-BIO

Study Title: A study investigating the efficacy of BIOEC2015 in reducing the clinical signs associated with canine inflammatory bowel disease (IBD)

### 4.2. Objective

The study aim was to test the hypothesis that BIOEC2015 is effective in reducing the clinical signs associated with canine inflammatory bowel disease (IBD).

The study objective was to evaluate the clinical efficacy of BIOEC2015 in a placebo-controlled, double-blinded clinical trial based on responses given in owner-administered questionnaires and the Canine Chronic Enteropathy Clinical Activity Index (CCECAI).<sup>1</sup>

### 4.3. Background

It is currently accepted that IBD in dogs – as in humans – is the consequence of a deranged immune response to luminal bacteria in genetically susceptible individuals.<sup>2</sup> The interaction of receptors of the innate immune system – so-called pattern-recognition receptors, PRRs – are expressed by epithelial cells and antigen-presenting cells of the intestinal mucosa. Luminal bacteria seem to play an important role both in the maintenance of tolerance towards commensal bacteria and, in the case of pathogens, in mounting an appropriate inflammatory response.

BIOEC2015 (the compound) is hypothesised to exert its beneficial effects in canine IBD by:

Changing the intestinal microbiome composition by binding to certain TLRs and thereby replacing commensal bacteria that may act as triggers in canine IBD increasing anti-inflammatory cytokine production (IL-10) and decreasing pro-inflammatory cytokine production (IL-1beta, TNF) in the intestinal epithelium.

It was hypothesized that the individual animals receiving the compounds would benefit from the clinical trial and – if *the compounds* are proven to be efficacious – all dogs with IBD in the future. Furthermore, it was hoped that the results of this study would have important clinical implications for the understanding of the pathogenesis of canine IBD. The results may also be relevant for the treatment of human IBD, for which the canine disease may be considered an outbred model.

Ultimately, the aim was to advance the treatment of canine IBD in veterinary medicine.

### 4.4. Key Dates

The study was conducted according to the authorised protocol and protocol amendments 1-5.

|                                                    |                                      |
|----------------------------------------------------|--------------------------------------|
| Protocol Signing and Study Initiation              | 15th September 2015                  |
| Experimental Phase Commenced (first “animal task”) | 13th October 2015                    |
| Experimental Phase Completed (last “animal task”)  | 24th April 2018                      |
| Study Completion                                   | See Investigator signature on page 8 |

## 5. MATERIALS AND METHODS

### 5.1. Study Sites

This study was conducted at one Investigator site in the United Kingdom. This site is a specialist referral hospital. Statistical analysis was performed at Iowa State University.

### 5.2. Test Animals

Dogs are the intended target species for CIC-15-BIO.

Twenty dogs were enrolled (10 in each treatment group). These consisted of male and female dogs (entire and neutered) of various breeds and crossbreeds aged between approximately 14 and 131 months of age and weighing between 7.85kg and 39.10kg.

Dogs enrolled onto the study were client-owned and met all of the inclusion criteria and none of the exclusion criteria (as detailed in section 5.5). Dogs were identified by name and owner's surname. In addition to this each dog had a unique study identifier assigned at enrolment (consisting of the pre-fix "RVB", followed by a numerical number e.g. RVB01). Dogs were enrolled through the Internal Medicine Service at the QMHA. Animal details can be seen in Appendix 1, Table A1 and A2.

### 5.3. Housing of Animals

For the majority of the study, dogs were housed in their home environment with their owners. When at the Investigator site for study procedures and if required, dogs were housed in the kennel unit at the QMHA as per standard veterinary practice.

### 5.4. Feed and Water

The dogs were fed a commercial hydrolysed diet (Purina Veterinary Diets™ HA Hypoallergenic™) by their owners from screening until visit 4. When in their home environment water was provided adlib.

When hospitalised, dogs were fed the standard patient diet (visit 1) or Purina HA (Visit3) and provided with water ad lib (except when withheld for medical reasons e.g. prior to anaesthesia).

Following visit 4 with the exception of RVB29 the owners attempted to reintroduce the pet's usual diet (as chosen by their owner) over the next 7days. Where worsening of clinical signs occurred Purina HA was reintroduced solely or in part. Five dogs (RVB16, 20, 32, 34 and 35) were successfully returned to their previous diet after gradually reintroducing it following V4. See Appendix 1 Table A20 for further details.

RVB13 reintroduced Chappie between V4 and V5, the dog clinically worsened and the dog returned to Purina but the owner requested that she try Chappie again re-introducing more slowly. The dog was later changed exclusively to Purina HA after worsening again, however, the owner began feeding small amounts of WAGG diet in addition to Purina HA four days prior to V7.

RVB18 was reported to vomit chicken following V3 when it should have exclusively been fed Purina HA; the owner does not know where it scavenged the chicken from. Due to this there was a delay in returning the dog to their usual diet after V4. Prior to re-introducing the dog's normal diet, it scavenged dog food from elsewhere and was sick again. The owner fed Purina HA for the remainder of the study.

## 5.5. Animal Inclusion and Exclusion Criteria

### 5.5.1. Inclusion Criteria

Dogs which fulfilled the following inclusion criteria were eligible for recruitment in the study:

- Dogs  $\geq$ 6 months of age on Day 1
- Dogs  $\geq$ 5kg on Visit 1
- Chronic history ( $>$ 3 weeks) of vomiting and/or diarrhoea
- Confirmed diagnosis of IBD based on clinical and histopathological findings, and diet responsive to Purina HA.
- Dogs deemed not to be suffering from any additional disease process as listed below
  - Metabolic disease
  - Neoplastic disease
  - Infectious or autoimmune disease
  - Cardiopulmonary disease that would increase the risks of general anaesthesia will be excluded from the study.
- Patients who have received antibiotic treatment can be included but treatment must have stopped 7 days prior to Day 1
- Homeopathic remedies are acceptable for patients on the study, this should be recorded on the Treatment Form
- Patients receiving NSAID's can be included but must have stopped treatment 7 days prior to Day 1.
- Patients receiving glucocorticoid medication can be included but must be tapered off the drug and have completely stopped treatment 7 days prior to Day 1.

### 5.5.2. Exclusion Criteria

Dogs with the following criteria or concurrent diseases were excluded with the exception of RVB11 who had concurrent Giardia; data for this dog was assessed as suitable for inclusion by Karin Allenspach (see NTF):

- Dogs of less than 6 months of age on Day 1
- Dogs weighing  $<$ 5kg on Visit 1
- Metabolic disease
- Neoplastic disease
- Infectious or autoimmune disease



- Cardiopulmonary disease that would increase the risks of general anaesthesia will be excluded from the study.
- Pregnant and lactating bitches or dogs intended for breeding
- Patients receiving antibiotic therapy within the 7 days prior to Day 1.
- Any dogs that have received glucocorticoid medication and/or non-steroidal anti-inflammatory drugs in the 7 days prior to Day 1 will be excluded from the study.
- Other causes of diarrhoea identified on clinical investigation
- Dogs who were not diet responsive to Purina HA.

### 5.6. Post – Inclusion Removals

Dogs discontinued the study for the following reasons:

Five dogs were withdrawn (RVB05, 07, 09, 12 and 28) because of worsening of clinical signs. These dogs were removed : RVB05 – prior to Visit 2; RVB07 –prior to Visit 3; RVB09 –at Visit 3, RVB12 –at Visit 3; and RVB28 –prior to Visit 3.

One dog (RVB27) was withdrawn because the dog refused to take the test compound. This dog received five part-doses over a two-week period.

One dog (RVB30) was withdrawn prior to Visit 3 because it required treatment with Apoquel and Cephalexin for a skin condition.

Two further dogs were replaced: RVB04 because the dog was diagnosed with adenocarcinoma after enrolment and RVB23 because the owner decided not to continue after administering only one dose of compound. Their treatments were reallocated following the same process as that described for the non-enrolled dogs.

### 5.7. Animal Fate

All dogs at the end of the study remained with their owners and were then subject to normal veterinary and husbandry practices.

### 5.8. Concomitant Treatments

Concomitant medications were approved by the Investigator. All concomitant medications were recorded, these are shown in Appendix 1, Table A40 and A41.

### 5.9. Investigational Veterinary Product (IVP) and placebo

#### 5.9.1. Investigational Veterinary Product

Name: BIOEC2015  
Identity: Product A (Treatment 1)  
Appearance: Reddish-brown powder

|                      |                                                                                                                                                                                                                                                                                                                                                                                                                      |
|----------------------|----------------------------------------------------------------------------------------------------------------------------------------------------------------------------------------------------------------------------------------------------------------------------------------------------------------------------------------------------------------------------------------------------------------------|
| Odour:               | Odourless                                                                                                                                                                                                                                                                                                                                                                                                            |
| Manufacturer's name: | Bioiberica SAU                                                                                                                                                                                                                                                                                                                                                                                                       |
| Contents:            | 2500mg resistant starch<br>300mg prebiotics ( $\beta$ -glucans and mannanoligosaccharides (MOS))<br>200mg chondroitin sulphate<br>20mg glycosaminoglycans<br>560mg bentonite<br>400mg flavourings (hydrolysed; of pork and poultry origin)<br>20mg iron oxide                                                                                                                                                        |
| Supplied as:         | Boxes containing 30 sachets.                                                                                                                                                                                                                                                                                                                                                                                         |
| Batch Details:       | 2401                                                                                                                                                                                                                                                                                                                                                                                                                 |
| Expiry Date:         | 06-2018                                                                                                                                                                                                                                                                                                                                                                                                              |
| Storage:             | Stored at room temperature away from moisture and heat.<br><br>Continuous monitoring of the room containing the IVP was undertaken using a digital memory monitoring thermometer; maximum and minimum temperatures were obtained and recorded from product receipt and for the study duration. The thermometer used was validated annually.<br><br>All supplies were stored in a secure limited access storage area. |
| Dose:                | 5.00-14.99kg: 1 sachet SID<br>15.00-34.99kg: 2 sachets SID<br>35.00kg or more: 3 sachets SID<br><br>The dose was mixed with food or sprinkled over it; dry food was wetted by some owners. For one dog (RVB27), it was necessary to dilute the powder with water and administered using a syringe.                                                                                                                   |

### 5.9.2. Placebo

|                      |                         |
|----------------------|-------------------------|
| Name:                | Placebo                 |
| Identity:            | Product B (Treatment 2) |
| Appearance:          | Reddish-brown powder    |
| Odour:               | Odourless               |
| Manufacturer's name: | Bioiberica SAU          |
| Contents:            | 660mg bentonite         |

|                |                                                                                                                                                                                                                                                                                                                                                                                                                      |
|----------------|----------------------------------------------------------------------------------------------------------------------------------------------------------------------------------------------------------------------------------------------------------------------------------------------------------------------------------------------------------------------------------------------------------------------|
|                | 400mg flavourings (hydrolysed; of pork and poultry origin)                                                                                                                                                                                                                                                                                                                                                           |
|                | 20mg iron oxide                                                                                                                                                                                                                                                                                                                                                                                                      |
| Supplied as:   | Boxes containing 30 sachets.                                                                                                                                                                                                                                                                                                                                                                                         |
| Batch Details: | K001                                                                                                                                                                                                                                                                                                                                                                                                                 |
| Expiry Date:   | 05-2018                                                                                                                                                                                                                                                                                                                                                                                                              |
| Storage:       | Stored at room temperature away from moisture and heat.<br><br>Continuous monitoring of the room containing the IVP was undertaken using a digital memory monitoring thermometer; maximum and minimum temperatures were obtained and recorded from product receipt and for the study duration. The thermometer used was validated annually.<br><br>All supplies were stored in a secure limited access storage area. |
| Dose:          | 5.00-14.99kg: 1 sachet SID<br>15.00-34.99kg: 2 sachets SID<br>35.00kg or more: 3 sachets SID                                                                                                                                                                                                                                                                                                                         |

### 5.9.3. Supply and Storage of IVP

The IVP was supplied to the RVC by the Sponsor in one shipment and was received in good condition on 25Sep15.

The boxes containing sachets of IVP were stored at room temperature and dispensed to each owner at visits 1, 2 and 3.

The IVP was labelled as follows:

Product A / B

BIOIBERICA PRJ 00238 - IBD study RVC

Batch No.

Best before date

For Veterinary Clinical Trial Use Only

Store at room temperature away from heat and moisture

Manufactured by: BIOIBERICA S.A. Plaza Francesc Macià, 7. 08029 Barcelona (SPAIN)

For Animal Treatment only

Keep out of reach of children

### 5.10. IVP Use and Fate

The CIC was responsible for maintaining records including identification, quantities and dates of the test materials received, dispensed and returned. The Dispenser in the CIC completed records at each visit. Raw data associated with drug use and accountability is available in the study file.

Records of receipt, use and unused stock were maintained. Drug accountability was performed and any discrepancies investigated and explained. Drug returns and unused stock were disposed of in pharmaceutical waste by the test site.

### 5.11. Randomisation and blinding

Dogs who met the inclusion criteria at Visit 1 were assigned one of two treatment groups (product A or B) according to the random treatment allocation plan (RTAP).

The patients were discharged from the hospital once they had recovered sufficiently from anaesthesia and the owners told to feed Purina HA exclusively whilst awaiting biopsy results.

Owners were contacted approximately one-week post discharge to assess response to diet. Dogs who were diet responsive and met all other inclusion criteria were enrolled and owners told to start study medication. Dogs who had not responded to the hypoallergenic diet were fed Purina HA for a further week, reassessed and then enrolled or excluded from the study.

If the dog was not enrolled onto the study, its treatment allocation was added to the end of the RTAP and the treatment reallocated.

Recruitment continued until twenty dogs had been enrolled with 10 dogs in each group. Both groups were fed a hydrolysed (Purina HA) exclusive to any other food from screening until visit 4. Group A (n = 10 dogs) received the test compound BIOEC2015 in addition. Group B (n = 10 dogs) received a placebo designed by Bioiberica Ltd. that was identical appearance to the probiotic formulation.

Two further dogs were replaced: RVB04 because the dog was diagnosed with adenocarcinoma after enrolment and RVB23 because the owner decided not to continue after administering only one dose of compound. Their treatments were reallocated following the same process as that described for the non-enrolled dogs.

Both the dogs' owners and evaluators (including clinicians and those analysing samples and tissues) had no knowledge of the treatment group assignments.

The study nursing staff were not blinded. The study nursing staff acted as dispensers.

Randomisation was done using block randomisation with an allocation ratio of one-to-one, a random number generator in excel and a block size of 4. The RTAP was designed according to this. The CIC nurses had access to this and as dispensers sequentially allocated the study patients to a group.

No patients required un-blinding during the courses of the study.

## 5.12. Sample fate

No study samples other those sent for diagnostics were stored or analysed. Samples collected for research (sponsor and RVC) are not reported as part of this study.

## 6. EXPERIMENTAL DESIGN

### 6.1. Study Schedule

Each dog was evaluated as indicated in the table below.

Table 1 Schedule of Events

| Visit Number | Physical examination (general and IBD) | CCECAI | Blood sample | Urine sample | Faecal sample (Diagnostic) | Ultrasound | Endoscopy |
|--------------|----------------------------------------|--------|--------------|--------------|----------------------------|------------|-----------|
| Visit 1      | √                                      | √      | √            | √            | √                          | √          | √         |
| Visit 2      | √                                      | √      | √            |              |                            |            |           |
| Visit 3      | √                                      | √      | √            | √            |                            |            | √         |
| Visit 7      | √                                      | √      | √            | √            |                            |            |           |

A telephone interview was conducted to confirm enrolment. This occurred approximately one week after endoscopy. If no improvement had been seen on Purina HA, the diet was fed for a further week and a second telephone interview conducted to established whether the dog could be included in the trial. Three dogs (RVB27, 28 and 34) required Purina HA to be fed for a further week before being confirmed as diet responsive and one dog (RVB35) had enrolment delayed by a week avoid appointments clashing with the owner's vacation.

Day 1 was defined as the first day of dosing.

Hospital Visits occurred at: Visit 2 occurred Day 14 ( $\pm$  2days) except for one dog RVB28 whose Visit 2 occurred 1 day late at Day 17; Visit 3 occurred at Day 70( $\pm$ 2days); and Visit 7 at Day 126 ( $\pm$ 5 days).

Telephone visits were conducted for Visit 4 at Day 77 ( $\pm$ 5d); Visit 5 at Day 91 ( $\pm$ 5 d) and Visit 6 at Day 105 ( $\pm$ 5d).

Details of medication given during the courses of the study were documented at each site / telephone visit; these concomitant medications are shown in Appendix 1, Tables A40 and A41.

Patient history including any medication given within three months prior to screening was also documented (details available in study file) and the information used in conjunction with visit 1 assessments to ensure all inclusion/ exclusion criterial including drug withdrawal periods were met.

## 7. OBSERVATIONS AND MEASUREMENTS

### 7.1. Physical Examination

A physical examination was performed by the investigator at each site visit (Visits 1, 2, 3 and 7). This included a general examination of the respiratory, cardiac and musculo-skeletal systems. Abnormal findings were documented and classified as clinically / not clinically significant (see Appendix 1, Table A21).

An IBD assessment was also performed by the investigator, which included assessment of abdominal pain/discomfort, pruritus, and ascites/peripheral oedema (see Appendix 1, Table A18).

Information on drinking and diet was also obtained (see Appendix 1, Tables A19 and A20).

### 7.2. CCECAI and CIBDAI

The canine chronic enteropathy clinical activity index (CCECAI) consisted of the information assessed in the owner questionnaire, clinical findings (oedema formation, ascites and pruritus) and the serum albumin level and was performed at all site visits (Visit 1, 2, 3 and 7).

The Canine IBD Activity Index (CIBDAI) consisted only of information assessed in the owner questionnaire. It formed part of the CCECAI and was also conducted at each telephone visit (Visits 4, 5 and 6).

CCECAI and CIBDAI scores from scheduled visits are shown in Appendix 1, Tables A22 and A23.

### 7.3. Diagnostic samples: blood, urine and faeces

Diagnostic samples were submitted to the Clinical Pathology Laboratory at the Royal Veterinary College. Samples for RVB12 V2 were sent to external laboratory "Powell Torrance Diagnostic Services" for albumin levels as the RVC analyser was awaiting repair. All results were reviewed by the investigator and any out of range values assessed. The results and outcome of assessment are shown in Appendix 1, Tables A5 – A17).

Additional samples were collected and stored for research purposes (RVC and sponsor); these included blood, urine and faeces / faecal swabs at each site visit. These samples are not to be analysed as part of this study and are therefore not included in this report.

#### 7.3.1. Blood samples

| Test                                   | Sample type                                       | Frequency          |
|----------------------------------------|---------------------------------------------------|--------------------|
| Biochemistry **                        | Serum gel and fluoride oxalate                    | Visits 1 , 3 and 7 |
| Albumin                                | Serum gel                                         | Visit 2            |
| Haematology **                         | EDTA                                              | Visits 1, 3 and 7  |
| TLI **                                 | Serum gel                                         | Visit 1 *          |
| Folate and Cobalamin Concentrations ** | Serum gel                                         | Visit 1, 3 and 7   |
| cPLI **                                | Serum gel                                         | Visit 1            |
| ACTH stimulation test **               | Serum gel (pre and post synacthen administration) | Visit 1 *          |

\* Where TLI and or ACTH stimulation test had been performed by the referring practice during the 3 months prior to Visit 1 this result was used and the test not repeated. All results are available in the study files.

\*\* Blood results for RVB09 were used from a hospital visit undertaken one week prior to V1.

#### 7.3.2. Biochemistry profile

Serum biochemistry profile included measurement of: Albumin, Globulin, Sodium, Potassium, Chloride, Calcium, Inorganic Phosphorous, Urea, Creatinine, Cholesterol, Total Bilirubin, Amylase, Lipase, ALT, CK and ALP. Where a fluoride oxalate tube was submitted, a glucose measurement was also performed; where this was not done, it was reported as a protocol deviation (see Appendix 1, Table A39).

#### 7.3.3. Haematology profile

Haematology profile included: WBC, Neutrophils, Lymphocytes, Monocytes, Eosinophils, Basophils, RBC, HGB, HCT, MCV, MCH, MCHC, RDW and PLT.

#### 7.3.4. Urine sample

Urinalysis was performed at visits 1 (except RVB27), 3 (except RVB09) and 7 (except RVB01, RVB16, RVB18) and included measurement urine specific gravity, dipsticks and sediment examination.

#### 7.3.5. Faecal sample

Faecal samples were submitted for parasites and culture as part of the screening process undertaken at Visit 1. This was not done for RVB13, RVB20, RVB19, RVB27, and RVB30 where it was not possible to obtain a sample or RVB22 where it was not possible to obtain sufficient sample for faecal culture (see Deviation Table). A faecal sample could not be collected at V1 for RVB32 but a sample was submitted at V2 instead and this was negative for parasites and bacteriological examination.

### 7.4. Ultrasound

Abdominal ultrasound was performed at Visit 1 as part of the diagnostic evaluation.

### 7.5. Endoscopy

#### 7.5.1. Procedure

Upper and lower GI Endoscopy was performed under general anaesthesia at Visit 1 and Visit 3. Animals were induced with propofol to effect and maintained on isoflurane / sevoflurane vapourised in oxygen. Study animals were fasted for 48hours prior to the endoscopy and prepared for colonoscopy using commercial and/ or warm water enemas +/- Kleen prep (see Appendix 1 Table A35). Biopsies were taken and placed in 10% formalin for diagnostic evaluation from the duodenum, colon (except RVB02 V1 were due to poor visibility this was not possible), ileum (when possible) and stomach when deemed clinically necessary by investigator.

Additional biopsies were collected and stored for research purposes (RVC and sponsor); these samples are not to be analysed as part of this study and are therefore not included in this report.

A decision was made to withdraw RVB09 and RVB12 at V3 due to worsening of clinical signs; only partial data was collected and endoscopy was not performed.

#### 7.5.2. Histological scoring of biopsies

Biopsies were scored by Dr Simon Priestnall, Dept of Pathobiology and Population Sciences (PPS), RVC. This was done in one sitting based on the WSAVA guidelines for the assessment of endoscopic intestinal biopsy samples. Histopathology results are shown in Appendix 1, Tables A24-A28.

Diagnostic evaluation of biopsies was performed by pathologists at the RVC Clinical Pathology Laboratory (see Appendix 1, Tables A44-46).

### 7.6. Adverse Events

An adverse event was defined as any observation in an animal that is unfavourable and unintended and occurs after the use of the veterinary product or investigational veterinary product (IVP) whether or not considered to be product related.

Details of adverse events and any therapy implemented were documented by the Investigator on an Adverse Event form, and concomitant medication form, where relevant. All adverse events occurring throughout the duration of the study were reported to the study monitor and sponsor.

For the purpose of this study, clinical signs associated with IBD, e.g. vomiting and diarrhoea were not documented as an adverse event unless thought to be IVP related or due to a cause other than inflammatory bowel disease.

No Serious Adverse Event occurred.

During the course of the study 13 adverse events (AEs) occurred, affecting 10 dogs; these are shown in Appendix 1 Tables A42: The causality was classified as: condition/disease diagnosed after enrolment (n=2), unknown/test article (n=3) and other (n=8). Four AEs required treatment (Appendix 1 Table A43).

### 7.7. Efficacy Assessments

CIBDAI and CCECAI scores were used to assess efficacy based on changes in the CCECAI/CIBDAI value. CIBDAI / CCECAI scores were obtained when site visits (V1, V2, V3 and V7) were performed; CIBDAI scores were also collected when telephone visits (V4-V6) were undertaken. Results are shown in Appendix 1 Tables A22 and A23.

Information about the dogs themselves was collected to assess similarity between groups. This information is shown in Appendix 1 Tables A1 and A2.

Blood tests and urine tests were performed at V1, V3 and V7, and histopathology on intestinal biopsies at V1 and V3 (with the exception of RVB29 and RVB31 at V3). A blood sample was also collected at V2 evaluation of albumin levels. Blood results are shown in Appendix 1 Tables A5-14; albumin results in Appendix 1 Table A7. urine results in Appendix 1 Tables A15 and A16; clinical pathology reports in Appendix 1 Tables A44-A46 and WSAVA scores in Appendix 1 Tables A24-28.

Data was compared between groups and within groups to assess similarity, disease severity and to assess improvement with treatment verse placebo. These results are shown in section 10 of the report.

### 7.8. Study End Points

Final assessment for the purposes of the study occurred at Visit 7. Thirteen dogs reached this time point with seven others requiring withdrawal prior to this visit (See Appendix 1 Table A4). Data from all completed visits was used for statistical analysis and is shown in the data tables in Appendix 1.

## 8. RECORDS AND REPORTS

### 8.1. Record Storage and Archiving

All documents relating to the conduct of the study were kept in a secure location at the RVC for the duration of the study.

All original study documentation will be retained at the RVC CIC archive facilities for a period of two years, at this time the sponsor will be contacted to decide on document retention.

An electronic copy of the study data will be sent to the sponsor following issue of the Final Study Report.



## 8.2. Protocol Amendments

Five formal amendments were made to the protocol. All were authorised by the sponsor, investigator and study monitor prior to initiation.

### Protocol Amendments

| Amendment Number         | Summary of Amendments                                                                                                                                                                                                                                                                                                                                                                                                                                                                                                                                                                                                                                                                                                                         |
|--------------------------|-----------------------------------------------------------------------------------------------------------------------------------------------------------------------------------------------------------------------------------------------------------------------------------------------------------------------------------------------------------------------------------------------------------------------------------------------------------------------------------------------------------------------------------------------------------------------------------------------------------------------------------------------------------------------------------------------------------------------------------------------|
| 1<br>(Issued<br>15Dec15) | <ul style="list-style-type: none"> <li>- Biopsies were collected into ice cold culture medium (Biopsy sample D) at Visit 1 until 10 full sets (12 biopsies from duodenum, ileum and colon) had been obtained. No further Biopsy sample D were collected after this point.</li> <li>- No biopsies needed collecting on ice cold culture medium (Biopsy sample D) at Visit 3.</li> <li>- Form 11 changed to reflect changes in Biopsy sample D collection. Additional column added to allow person entering data to sign and date form.</li> <li>- PPL number amended to 70/7393</li> <li>- Title and qualifications amended for Lead Investigator and Study Monitor</li> <li>- Full postal address of sponsor representative added.</li> </ul> |
| 2<br>(Issued<br>29Mar16) | <ul style="list-style-type: none"> <li>- Lead investigator role transferred to Oliver Garden. Karin Allenspach transferred to role of co-investigator but remains responsible for compiling Final Study Report. Contact details for co-Karin Allenspach updated</li> </ul>                                                                                                                                                                                                                                                                                                                                                                                                                                                                    |
| 3<br>(Issued<br>16Nov16) | <ul style="list-style-type: none"> <li>- Lead investigator role transferred to Barbara Glanemann following departure of Oliver Garden from RVC on 2<sup>nd</sup> December 2016. Contact details for co-investigator Karin Allenspach updated.</li> </ul>                                                                                                                                                                                                                                                                                                                                                                                                                                                                                      |
| 4<br>(Issued<br>14Sep17) | <ul style="list-style-type: none"> <li>- Form 11 changed to include biopsies for histopathology and list sample tube types required for each test. Investigator signature removed and pages labelled part A and part B; part B completed at Visits 1 and 3 only</li> </ul>                                                                                                                                                                                                                                                                                                                                                                                                                                                                    |
| 5<br>(Issued16Jul18)     | <ul style="list-style-type: none"> <li>- One additional serum aliquot from Visits 1 and 3 are the property of the sponsor.</li> </ul>                                                                                                                                                                                                                                                                                                                                                                                                                                                                                                                                                                                                         |

### 8.3. Protocol Deviations

Forty-nine protocol deviations were filed by the Investigator during the study period. A list of deviations including action taken and impact assessment can be found in the Appendix 1 Table A39. This also includes deviations relating to samples collected for non-study purposes (Sponsor and RVC).

The deviations listed do not impact the conclusions of the study.

### 8.4. Preparation of the Investigator Study Report

This is a final study report, which refers to the conduct of the study specified and appropriately summarises the data generated during the study.

### 8.5. Data Handling

Data generated was entered into spreadsheets (Microsoft<sup>®</sup> Excel 2016), which was electronically locked following 100% checking of the data.

## 9. DATA ANALYSIS

### 9.1 Statistical Analysis:

Statistical analysis was performed using R software version 3.5.1 (R Foundation for Statistical Computing, Vienna, Austria). Normality was tested for each variable using Shapiro-Wilk for all parametric approaches. When the assumption did not hold, the nonparametric test (Mann-Whitney) was used for the variables measured only at one (visit=1) or two time points (visits=1,3) to compare differences between two groups. With variables involving multiple time points (more than two), each outcome was analyzed using a linear mixed effects model for group comparison. For each analysis, time, group, and their interactions were included as a fixed effect, whereas each dog was treated as a random effect. To test the correlation between variables of interest Spearman's rank correlation coefficients and the corresponding p-values were calculated. For all statistical analyses, a p-value < 0.05 was considered significant.

### 9.2 Data exclusions:

Data from the following unscheduled visits was not included in the analysis:

- Unscheduled visit for RVB07 on 04FEB16 (Withdrawal due to progressive weight loss and diarrhoea)
- Unscheduled visit for RVB09 on 18Feb16 (Incorrect visit time point)
- Unscheduled visit for RVB05 on 21Dec15 (Withdrawn as stopped IVP 01Dec15 and receiving treatment with steroids and cyclosporine since 05Dec15)
- Unscheduled visit for RVB28 on 26Jun17 (Withdrawal, last dose of IVP 05Jun17, treatment with prednisolone and antibiotics started 08Jun17)

The following data was also excluded from the analysis:

- Visit 2 data for RVB27 due to non-compliance with dosing

## 10. RESULTS

### 10.1 Study Population

Twenty (20) client-owned dogs were enrolled onto the study. Case allocation to Group 1 and 2 are shown in in Appendix 1 Table A1.

Dogs were randomly assigned to one of the two treatment groups (10 dogs in Group 1, and 10 in Group 2), and they ranged in age from 25 to 131 months for group 1 and 19 to 80 months for group 2, at the initial visit (Visit No =1). Descriptive statistics of demographic variables (Group, Age, Gender, and Breed) are given

in Table 1. All 20 dogs were included in the analysis, and there were no significant mean differences in outcome variables between the missing (13 completed) and nonmissing (20 enrolled) groups. Note that each variable was taken at different time points (among the visits from 1 through 7). For example, TLI and cPLI were measured only at the initial visit, while Albumin, Cobalamin, Folate and Globulin were measured at the visits 1, 3 and 7. An average profile for each group for some of the variables in the dataset are given in Figures 2,3, and 4.

## 10.2 Evaluation of Efficacy

No statistically significant differences were found in CCECAI (p-value=0.5798) and CIBDAI scores (p-value=0.9520) between two groups (Figure 1). For blood samples, there were no group effects on average for Albumin (p-value=0.9358), Cobalamin (p-value=0.4094), Folate (p-value=0.445), Globulin (p-value=0.3580), TLI (p-value=0.8292), and cPLI (p-value=0.7959), (Figure 2). There were also no significant time or group effects on PCV/haematocrit, RBC, erythrocyte indices or haemoglobin concentrations (p-value=0.932) There were also no significant time and group interactions in Endoscopy scores D (p-value=0.3778), I (p-value≈1), and C (p-value=0.8785), (Figure 3). The variable WSAVA (total) is defined as the sum of sub-total scores, that is,  $WSAVA(\text{total}) = SF \text{ SubTotal} + SA \text{ SubTotal} + D \text{ SubTotal} + I \text{ SubTotal} + C \text{ SubTotal}$ . Testing for the interaction of time and group results in p-value= 0.8116 for SF SubTotal, 0.5462 for SA SubTotal, 0.1768 for D SubTotal, ≈1 for I SubTotal, and 0.5034 for C SubTotal, indicating no statistically significant interaction effects, as well as for WSAVA (total) with p-value = 0.4487 (Figure 4).

A graphical display of a correlation matrix is given in Figure 5 for the variables, CCECAI, CIBDAI, SF, SA, D, I and C sub-total scores, WSAVA total, Endoscopy D, I and C, Albumin, and Cobalamin. We see some strong positive correlations between D and I sub-totals and Endoscopy D and I scores. There are some negative correlations between Endoscopy scores (D and I, as well as D and I sub-totals) and Albumin and Cobalamin.

Individual animal data is presented in Appendix 2, Tables A1 and A2.

## 11. DISCUSSION

Of the 35 dogs enrolled into the clinical trial, 10 in each group reached the point of second endoscopy. A total of 13 dogs (n=8 in the group 1 and n=5 in group 2) reached the trial endpoint of 18 weeks. No statistically significant differences were found in CCECAI (p-value=0.4761) and CIBDAI scores (p=0.8510) between the two groups. Furthermore, there were no group effects on average for Albumin (p=0.9116), cobalamin (p=0.7170), folate (p=0.3530), globulin (p=0.1640), TLI (p=0.5503), and cPLI (p=0.8238). There were also no significant time and group interactions in Endoscopy scores for the duodenum (p=0.8162), ileum (p≈1), and colon (p=0.6289). Similarly, no statistically significant differences between groups were found in total WSAVA scores (p=0.8), and WSAVA scores for duodenum (p=0.2), ileum (p=0.1) and colon (p=0.6). There was a strong positive correlation found between WSAVA duodenal and ileal scores and duodenal and ileal endoscopy scores. Moreover, there was a negative correlation seen between endoscopy scores in the duodenum and ileum and albumin and cobalamin serum concentrations. Power calculation revealed that 60 dogs per group would have been needed to detect statistically significant differences between treatment groups.

## 12. CONCLUSIONS

Standard dietary treatment induced rapid clinical response in all cases. Because the study was underpowered, it was not possible to determine whether or not supplementation with prebiotic and GAG had an additional effect on clinical outcomes or frequency of relapses.

## 13. REFERENCES

1. Allenspach K et al. Chronic enteropathies in dogs: evaluation of risk factors for negative outcome. J Vet Intern Med. 2007;21:700-8.
2. Dandrieux et al. Evaluation of lymphocyte apoptosis in dogs with IBD. Am J Vet Res. 2008;69:1279-85.

## 14. APPENDICES

Appendix 1: Individual Animal Data

Appendix 2: Results tables

## APPENDIX 1

TABLE A1. Group 1 Signalment and enrolment data

| Group | Treatment | Patient No. | Breed                      | DOB       | Approximate Age (Months) | Gender | Body Condition Score | Inclusion confirmed |
|-------|-----------|-------------|----------------------------|-----------|--------------------------|--------|----------------------|---------------------|
| 1     | BIOEC2015 | RVB01       | Cockapoo                   | 13-Jul-14 | 14                       | ME     | Ideal (4-5)          | 28-Oct-15           |
| 1     | BIOEC2015 | RVB07       | Staffordshire Bull Terrier | 01-Jan-05 | 131                      | MN     | Too Thin (1-3)       | 09-Dec-15           |
| 1     | BIOEC2015 | RVB08       | Border Collie              | 03-Jul-13 | 29                       | ME     | Too Thin (1-3)       | 17-Dec-15           |
| 1     | BIOEC2015 | RVB13       | Labrador Retriever         | 13-Dec-11 | 53                       | MN     | Too Heavy (6-9)      | 17-Jun-16           |
| 1     | BIOEC2015 | RVB16       | Cocker Spaniel             | 16-Jul-06 | 120                      | FN     | Ideal (4-5)          | 29-Jul-16           |
| 1     | BIOEC2015 | RVB18       | Cross Breed                | 28-Nov-12 | 44                       | FN     | Ideal (4-5)          | 11-Aug-16           |
| 1     | BIOEC2015 | RVB27       | Bearded Collie             | 18-Jun-12 | 56                       | FE     | Too Thin (1-3)       | 21-Mar-17           |
| 1     | BIOEC2015 | RVB29       | Labrador Retriever         | 04-Aug-09 | 91                       | MN     | Ideal (4-5)          | 18-Apr-17           |
| 1     | BIOEC2015 | RVB32       | Lurcher                    | 07-Apr-15 | 25                       | FN     | Ideal (4-5)          | 31-May-17           |
| 1     | BIOEC2015 | RVB35       | Staffordshire Bull Terrier | 17-Feb-11 | 81                       | FN     | Ideal (4-5)          | 19-Dec-17           |

ME = male entire, MN = male neutered, FE = female entire, FN = female neutered

TABLE A2. Group 2 Signalment and enrolment data.

| Group | Treatment | Patient No. | Breed                      | DOB       | Approximate Age (Months) | Gender | Body Condition Score | Inclusion confirmed |
|-------|-----------|-------------|----------------------------|-----------|--------------------------|--------|----------------------|---------------------|
| 2     | Placebo   | RVB02       | Cross breed                | 28-Sep-12 | 36                       | ME     | Ideal (4-5)          | 30-Oct-15           |
| 2     | Placebo   | RVB05       | Staffordshire Bull Terrier | 27-Sep-09 | 73                       | MN     | Ideal (4-5)          | 26-Nov-15           |
| 2     | Placebo   | RVB09       | German Shepherd            | 30-Apr-09 | 80                       | ME     | Too Thin (1-3)       | 10-Feb-16           |
| 2     | Placebo   | RVB11       | Boxer                      | 14-Mar-14 | 22                       | ME     | Too Thin (1-3)       | 10-Feb-16           |
| 2     | Placebo   | RVB12       | German Shepherd            | 27-Aug-11 | 54                       | FE     | Ideal (4-5)          | 18-Mar-16           |
| 2     | Placebo   | RVB20       | Border Collie              | 09-Sep-14 | 23                       | ME     | Ideal (4-5)          | 01-Sep-16           |
| 2     | Placebo   | RVB28       | Whippet                    | 20-Aug-15 | 19                       | FE     | Too Thin (1-3)       | 18-Apr-17           |
| 2     | Placebo   | RVB30       | French Bulldog             | 01-May-15 | 23                       | MN     | Ideal (4-5)          | 25-Apr-17           |
| 2     | Placebo   | RVB31       | Lhasa Apso                 | 27-May-12 | 58                       | MN     | Ideal (4-5)          | 02-May-17           |
| 2     | Placebo   | RVB34       | Labradoodle                | 13-Sep-14 | 36                       | MN     | Ideal (4-5)          | 28-Sep-17           |

ME = male entire, MN = male neutered, FE = female entire, FN = female neutered

TABLE A3. Patient history.

| Group | Treatment | Patient No. | Vaccination                                                                          | Worming        | History of Disease                                                                                                                                                                                                                                                                                                                                                                                                                                                                                                                                                                                                                                 | Duration of Disease  | Seasonal Influence |
|-------|-----------|-------------|--------------------------------------------------------------------------------------|----------------|----------------------------------------------------------------------------------------------------------------------------------------------------------------------------------------------------------------------------------------------------------------------------------------------------------------------------------------------------------------------------------------------------------------------------------------------------------------------------------------------------------------------------------------------------------------------------------------------------------------------------------------------------|----------------------|--------------------|
| 1     | BIOEC2015 | RVB01       | distemper virus, hepatitis contagiosa canis, parvovirus, parinfluenza, leptospirosis | Irregular      | Mrs Hartridge has owned Harvey since he was 12 weeks old and obtained him from a breeder. Since she has owned him he has had diarrhoea, the first episode was noted on 3rd November 2014. For this episode Canikur Pro Paste and a bland diet were prescribed. On November 26th 2014 a 3 day pooled sample was analysed and found no evidence of parasites or protozoa. On 4th June 2015 Harvey re-presented for chronic diarrhoea and low BCS (2/5), he also had bilaterally full anal glands due to diarrhoea.                                                                                                                                   | 1 year               | No                 |
| 1     | BIOEC2015 | RVB07       | distemper virus, hepatitis contagiosa canis, parvovirus, parinfluenza, leptospirosis | Every 2 months | Max developed (chronic) diarrhoea in August 2015. It is described as primarily small intestine in nature and he has lost weight despite a good appetite. D+ large volume and watery.                                                                                                                                                                                                                                                                                                                                                                                                                                                               | 3.5months            | No                 |
| 1     | BIOEC2015 | RVB08       | distemper virus, hepatitis contagiosa canis, parvovirus, parinfluenza, leptospirosis | Every 3 months | The owner obtained Finn from a breeder at 8 weeks of age, a few weeks later he started having episodes of yellow diarrhoea. He has continued to have these episodes on and off since then, with no particular pattern. The longest period without diarrhoea was 3 months. Initially the diarrhoea was very mucoid and smelly, however it has now changed. Finn squats for a while and then moves around when trying to pass diarrhoea. Although at the start there was some fresh blood, this is no longer a predominant feature. Finn currently has diarrhoea and has been 6 times in the last 8-9 hours. Over the past week Finn has lost 1.5kg. | Since 8 weeks of age | No                 |
| 1     | BIOEC2015 | RVB13       | distemper virus, hepatitis contagiosa canis,                                         | Every 6 months | Presented with 3 year chronic history of vomiting and diarrhoea. The owners have tried Dillon on several diets, most recently z/d.                                                                                                                                                                                                                                                                                                                                                                                                                                                                                                                 | 3 years              | No                 |

A study investigating the efficacy of BIOEC2015 in reducing the clinical signs associated with canine inflammatory bowel disease (IBD)

FINAL

|   |           |       |                                                                                      |                |                                                                                                                                                                                                                                                                                                                                                                                                                   |                                                                 |    |
|---|-----------|-------|--------------------------------------------------------------------------------------|----------------|-------------------------------------------------------------------------------------------------------------------------------------------------------------------------------------------------------------------------------------------------------------------------------------------------------------------------------------------------------------------------------------------------------------------|-----------------------------------------------------------------|----|
|   |           |       | parvovirus, parinfluenza, leptospirosis                                              |                | This caused him to have black, watery diarrhoea. He is currently on a mix of Chappie and WAGG. The vomiting is normally just partially digested food brought up 4 hours post eating, however, there was an episode in October 2015 where Dillon had fresh blood in both his vomitus and faeces. Dillon is vaccinated and wormed. He also has a mass on his left eyelid which is being treated with steroid cream. |                                                                 |    |
| 1 | BIOEC2015 | RVB16 | distemper virus, hepatitis contagiosa canis, parvovirus, parinfluenza, leptospirosis | Every month    | Rosie presented with an intermittent 9 month history of inappetance, vomiting and mixed bowel diarrhoea. Often after I/V fluids her appetite returned, however, recently this has proved difficult. Rosie has also suffered significant weight loss over a short period.                                                                                                                                          | Since October 2015                                              | No |
| 1 | BIOEC2015 | RVB18 | distemper virus, hepatitis contagiosa canis, parvovirus, parinfluenza, leptospirosis | Every 6 months | Bella has been having intermittent chronic vomiting since May 2016, after ingestion of soil containing fertiliser. Since this she has had repeated episodes which have improved after i/v fluids and medication. Her most recent episode was 30/31 July 2016.                                                                                                                                                     | Since 28 May 16                                                 | No |
| 1 | BIOEC2015 | RVB27 | None                                                                                 | Every 4 months | Long term history of chronic vomiting and diarrhoea since 4 years ago.                                                                                                                                                                                                                                                                                                                                            | Intermittent for 4 years                                        | No |
| 1 | BIOEC2015 | RVB29 | distemper virus, hepatitis contagiosa canis, parvovirus, parinfluenza, leptospirosis | Irregular      | 8 month history of vomiting several times a week                                                                                                                                                                                                                                                                                                                                                                  | 8 months                                                        | No |
| 1 | BIOEC2015 | RVB32 | distemper virus, hepatitis contagiosa canis, parvovirus, parinfluenza, leptospirosis | Irregular      | History of 2 episodes of vomiting. The first episode was associated with diarrhoea with mucus but no blood and inappetance (April). Second episode (end April 2017) mainly vomiting and reduced appetite                                                                                                                                                                                                          | Documented since April 2017 but suspect since prior to rehoming | No |

A study investigating the efficacy of BIOEC2015 in reducing the clinical signs associated with canine inflammatory bowel disease (IBD)

FINAL



|   |           |       |                                                                                                  |                |                                                                                                                                                                                                                                                                                                                                                  |                 |    |
|---|-----------|-------|--------------------------------------------------------------------------------------------------|----------------|--------------------------------------------------------------------------------------------------------------------------------------------------------------------------------------------------------------------------------------------------------------------------------------------------------------------------------------------------|-----------------|----|
| 1 | BIOEC2015 | RVB35 | None                                                                                             |                | Chronic vomiting and diarrhoea for 4 weeks. Watery, yellow vomit three to four times a day which has decreased over the past week. Watery diarrhoea with some blood but less frequent over the past week. Showing fewer signs of lethargy over the last seven days.                                                                              | 4 weeks         | No |
| 2 | Placebo   | RVB02 | distemper virus, hepatitis contagiosa canis, parvovirus, leptospirosis, kennel cough             | Every 3 months | 12 month history of intermittent retching and diarrhoea - watery and sometimes bloody. No food trial attempted but signs worsen when scavenging or when fed chicken. No weight loss. Generally good appetite other than when retching - which is generally self-limiting in <12h.                                                                | 12 months       | No |
| 2 | Placebo   | RVB05 | distemper virus, hepatitis contagiosa canis, parvovirus, parinfluenza, leptospirosis, bordatella | Every 3 months | Acute onset yellow watery diarrhoea started in June 2015. No response to treatment with two courses of antimicrobials, or to change to veterinary prescription diet (hills i/d)                                                                                                                                                                  | 4-5 months      | No |
| 2 | Placebo   | RVB09 | distemper virus, hepatitis contagiosa canis, parvovirus, leptospirosis                           | Every 3 months | 5 years of chronic diarrhoea. Varying from very watery to sometimes soft paste. Has received various treatments at referring vets with little success. Been tried on many different diets. Thin (chronically). Cobalamin levels were found to be low here on last visit.                                                                         | 4-5 years       | No |
| 2 | Placebo   | RVB11 | distemper virus, hepatitis contagiosa canis, parvovirus, parinfluenza, leptospirosis, rabies     | Every 3 months | Onset of loose stools June 2014. Ongoing intermittent diarrhoea with occasional vomiting and weight loss. Faecal analysis on 26 Nov 15 positive for Giardia, treated with metronidazole and fenbendazole. Despite initial improvement, the diarrhoea re-presented, this time with faecal analysis for giardia negative. Diarrhoea still ongoing. | Since 13 Jun 14 | No |
| 2 | Placebo   | RVB12 | distemper virus, hepatitis contagiosa canis, parvovirus, parinfluenza, leptospirosis,            | Every 3 months | 1 year intermittent vomiting and large bowel diarrhoea. Inappetance during these episodes; resolved after several days. In between episodes, is normal. No weight loss. Trialled on amox-clavulanate, metronidazole, maripopitant and ranitidine.                                                                                                | 1 year          | No |

|   |         |       |                                                                                                    |               |                                                                                                                                                                                                                                                                                                                                                                                                                                                        |           |    |
|---|---------|-------|----------------------------------------------------------------------------------------------------|---------------|--------------------------------------------------------------------------------------------------------------------------------------------------------------------------------------------------------------------------------------------------------------------------------------------------------------------------------------------------------------------------------------------------------------------------------------------------------|-----------|----|
| 2 | Placebo | RVB20 | distemper virus, hepatitis contagiosa canis, parvovirus, parinfluenza, leptospirosis               | Every 1 month | Woody presented with a history of intermittent, mixed bowel diarrhoea. His episodes of diarrhoea have been increasing in frequency and can be up to 3 times per week. There is often blood present in his faeces. Woody appears uncomfortable during each episode, with an arched back and tense stomach. Between episodes, Woody's stool is normal and he generally has a good appetite.                                                              | ~1 year   | No |
| 2 | Placebo | RVB28 | distemper virus, hepatitis contagiosa canis, parvovirus, parinfluenza,                             | Irregular     | 15 month history of mixed bowel diarrhoea                                                                                                                                                                                                                                                                                                                                                                                                              | 15 months | No |
| 2 | Placebo | RVB30 | distemper virus, hepatitis contagiosa canis, parvovirus, parinfluenza, leptospirosis               | Every 1 month | 4 weeks of diarrhoea. Some improvement on antibiotics but still no formed stools. No vomiting, reduced appetite.                                                                                                                                                                                                                                                                                                                                       | 4 weeks   | No |
| 2 | Placebo | RVB31 | distemper virus, hepatitis contagiosa canis, parvovirus, parinfluenza, leptospirosis, Kennel Cough | Irregular     | Approximately one year history of intermittent vomiting and chronic large bowel diarrhoea. Previous increased spec cPL. Treat for pancreatitis with low fat gastrointestinal diet but ongoing diarrhoea (vomiting improved). Was very overweight (~14kg) and been on a diet but owner feels excessive weight loss. One collapse ~ 3years ago, suspect anaphylactic shock. Second collapse three weeks ago, cause unknown. Chronic history of pruritis. | ~1 year   | No |
| 2 | Placebo | RVB34 | distemper virus, hepatitis contagiosa canis, parvovirus, parinfluenza, leptospirosis, bordatella   | Every 1 month | Chronic vomiting for 3 months, no diarrhoea, normal appetite, no weight loss.                                                                                                                                                                                                                                                                                                                                                                          | 3 months  | No |

TABLE A4. Completion and withdrawal.

| Group | Treatment | Patient No. | Last scheduled visit (Visit No) | Date of last scheduled visit | Completed study? | Date of withdrawal | Reason for Withdrawal                               | Comments                                                                                    |
|-------|-----------|-------------|---------------------------------|------------------------------|------------------|--------------------|-----------------------------------------------------|---------------------------------------------------------------------------------------------|
| 1     | BIOEC2015 | RVB01       | 7                               | 02-Mar-16                    | Yes              |                    |                                                     |                                                                                             |
| 1     | BIOEC2015 | RVB07       | 2                               | 22-Dec-15                    | No               | 04-Feb-16          | Animal withdrawn due to worsening of clinical signs | Progressive weight loss and diarrhoea                                                       |
| 1     | BIOEC2015 | RVB08       | 7                               | 20-Apr-16                    | Yes              |                    |                                                     |                                                                                             |
| 1     | BIOEC2015 | RVB13       | 7                               | 19-Oct-16                    | Yes              |                    |                                                     |                                                                                             |
| 1     | BIOEC2015 | RVB16       | 7                               | 01-Dec-16                    | Yes              |                    |                                                     |                                                                                             |
| 1     | BIOEC2015 | RVB18       | 7                               | 15-Dec-16                    | Yes              |                    |                                                     |                                                                                             |
| 1     | BIOEC2015 | RVB27       | 1                               | 07-Mar-17                    | No               | 06-Jun-17          | Other                                               | Owner could not administer IVP                                                              |
| 1     | BIOEC2015 | RVB29       | 7                               | 23-Aug-17                    | Yes              |                    |                                                     |                                                                                             |
| 1     | BIOEC2015 | RVB32       | 7                               | 04-Oct-17                    | Yes              |                    |                                                     |                                                                                             |
| 1     | BIOEC2015 | RVB35       | 7                               | 24-Apr-18                    | Yes              |                    |                                                     |                                                                                             |
| 2     | Placebo   | RVB02       | 7                               | 02-Mar-16                    | Yes              |                    |                                                     |                                                                                             |
| 2     | Placebo   | RVB05       | 1                               | 16-Nov-15                    | No               | 21-Dec-15          | Animal withdrawn due to worsening of clinical signs | Clinical decision was made to put dog on steroids and cyclosporine                          |
| 2     | Placebo   | RVB09       | 3                               | 19-Apr-16                    | No               | 19-Apr-16          | Animal withdrawn due to worsening of clinical signs | Recent 4kg weight loss and chronic diarrhoea. Needs to start on immunomodulatory medication |

|   |         |       |   |           |     |           |                                                     |                                                                                                                  |
|---|---------|-------|---|-----------|-----|-----------|-----------------------------------------------------|------------------------------------------------------------------------------------------------------------------|
| 2 | Placebo | RVB11 | 7 | 16-Jun-16 | Yes |           |                                                     |                                                                                                                  |
| 2 | Placebo | RVB12 | 3 | 25-May-16 | No  | 25-May-16 | Animal withdrawn due to worsening of clinical signs | Withdrawn due to worsening signs and the need for immunomodulatory medication                                    |
| 2 | Placebo | RVB20 | 7 | 06-Jan-17 | Yes |           |                                                     |                                                                                                                  |
| 2 | Placebo | RVB28 | 2 | 04-May-17 | No  | 26-Jun-17 | Animal withdrawn due to worsening of clinical signs | Clinical signs worsened, dog required veterinary attention and received antibiotics and prednisolone (26 Jun 17) |
| 2 | Placebo | RVB30 | 2 | 09-May-17 | No  | 03-Jul-17 | Other                                               | On 19 May 17 this dog was prescribed apoquel and cephalexin for an ongoing skin condition                        |
| 2 | Placebo | RVB31 | 7 | 01-Sep-17 | Yes |           |                                                     |                                                                                                                  |
| 2 | Placebo | RVB34 | 7 | 01-Feb-18 | Yes |           |                                                     |                                                                                                                  |

TABLE A5. Biochemistry results.

|       |           |             |           | Parameter:    |         | Units:   |         | Reference range: |          |          |                      |       |            |             |                 |          |         |       |        |           |         |
|-------|-----------|-------------|-----------|---------------|---------|----------|---------|------------------|----------|----------|----------------------|-------|------------|-------------|-----------------|----------|---------|-------|--------|-----------|---------|
| Group | Treatment | Patient No. | Visit No. | Total protein | Albumin | Globulin | Sodium  | Potassium        | Chloride | Calcium  | Inorganic Phosphorus | Urea  | Creatinine | Cholesterol | Total bilirubin | Amylase  | Lipase  | ALT   | CK     | ALP (U/I) | Glucose |
|       |           |             |           | 49-71         | 28-39   | 21-41    | 142-153 | 3.9-5.5          | 105-118  | 2.13-2.7 | 0.8-2                | 3-9.1 | 59-138     | 3.3-8.9     | 0-2.4           | 176-1245 | 72-1115 | 13-88 | 61-394 | 19-285    | 3-6     |
| 1     | BIOEC2015 | RVB01       | 1         | 60.8          | 34.8    | 26.0     | 149.0   | 4.20             | 114.0    | 2.64     | 1.82                 | 5.3   | 81         | 10.9        | 1.5             | 630      | 149     | 44    | 91     | 75        |         |
| 1     | BIOEC2015 | RVB01       | 3         | 63.9          | 36.7    | 27.2     | 148.0   | 4.10             | 113.0    | 2.57     | 1.41                 | 5.7   | 87         | 5.9         | 1.2             | 622      | 158     | 73    | 100    | 44        | 5.5     |
| 1     | BIOEC2015 | RVB01       | 7         | 59.1          | 35.3    | 23.8     | 149.0   | 3.80             | 115.0    | 2.54     | 1.18                 | 5.7   | 84         | 7.0         | 1.2             | 629      | 225     | 49    | 128    | 47        |         |
| 1     | BIOEC2015 | RVB07       | 1         | 40.8          | 22.7    | 18.1     | 148.0   | 5.40             | 115.0    | 2.09     | 1.22                 | 6.7   | 67         | 3.9         | 0.7             | 1102     | 637     | 73    | 151    | 50        |         |

A study investigating the efficacy of BIOEC2015 in reducing the clinical signs associated with canine inflammatory bowel disease (IBD)

FINAL

|   |           |       |   |      |      |      |       |      |       |      |      |      |     |     |     |      |     |    |     |     |     |
|---|-----------|-------|---|------|------|------|-------|------|-------|------|------|------|-----|-----|-----|------|-----|----|-----|-----|-----|
| 1 | BIOEC2015 | RVB08 | 1 | 55.4 | 31.2 | 24.2 | 148.0 | 4.50 | 113.0 | 2.33 | 1.26 | 4.5  | 93  | 4.1 | 1.5 | 830  | 117 | 33 | 74  | 36  | 4.7 |
| 1 | BIOEC2015 | RVB08 | 7 | 56.0 | 42.0 | 14.0 | 147.0 | 4.20 | 115.0 | 2.70 | 1.30 | 5.5  | 106 | 7.6 | 2.0 | 576  | 24  | 43 | 71  | 107 |     |
| 1 | BIOEC2015 | RVB08 | 3 | 55.9 | 31.5 | 24.4 | 146.0 | 4.10 | 115.0 | 2.37 | 1.07 | 6.0  | 92  | 7.4 | 2.5 | 647  | 146 | 57 | 60  | 94  |     |
| 1 | BIOEC2015 | RVB13 | 1 | 55.9 | 32.1 | 23.8 | 148.0 | 4.80 | 113.0 | 2.43 | 1.63 | 3.7  | 90  | 4.4 | 1.4 | 858  | 466 | 29 | 93  | 40  | 4.6 |
| 1 | BIOEC2015 | RVB13 | 3 | 58.6 | 35.2 | 23.4 | 140.0 | 4.10 | 101.0 | 2.58 | 1.56 | 6.1  | 96  | 6.2 | 2.1 | 712  | 443 | 54 | 120 | 60  | 4.7 |
| 1 | BIOEC2015 | RVB13 | 7 | 55.3 | 31.9 | 23.4 | 149.0 | 4.20 | 109.0 | 2.42 | 1.27 | 4.0  | 84  | 6.3 | 1.3 | 737  | 538 | 59 | 109 | 69  | 5.0 |
| 1 | BIOEC2015 | RVB16 | 1 | 47.6 | 27.8 | 19.8 | 147.0 | 4.60 | 115.0 | 2.26 | 0.87 | 3.7  | 66  | 2.6 | 1.0 | 1090 | 126 | 19 | 57  | 9   | 5.0 |
| 1 | BIOEC2015 | RVB16 | 3 | 46.3 | 26.4 | 19.9 | 145.0 | 4.70 | 112.0 | 2.33 | 0.90 | 4.8  | 73  | 2.8 | 1.7 | 966  | 119 | 27 | 106 | 13  |     |
| 1 | BIOEC2015 | RVB16 | 7 | 55.6 | 30.6 | 25.0 | 148.0 | 4.60 | 112.0 | 2.52 | 1.20 | 5.5  | 82  | 3.1 | 1.8 | 1015 | 198 | 28 | 67  | 16  | 5.1 |
| 1 | BIOEC2015 | RVB18 | 1 | 55.8 | 32.5 | 23.3 | 151.0 | 4.30 | 114.0 | 2.54 | 1.18 | 11.2 | 100 | 3.9 | 1.7 | 759  | 245 | 30 | 127 | 29  | 5.2 |
| 1 | BIOEC2015 | RVB18 | 3 | 61.7 | 35.7 | 26.0 | 144.8 | 4.35 | 108.5 | 2.62 | 1.29 | 6.2  | 83  | 7.0 | 0.3 | 630  | 231 | 46 | 160 | 57  | 5.9 |
| 1 | BIOEC2015 | RVB18 | 7 | 61.7 | 35.7 | 26.0 | 148.0 | 4.50 | 109.0 | 2.55 | 1.33 | 6.4  | 73  | 6.5 | 1.4 | 659  | 217 | 33 | 72  | 60  | 5.6 |

|   |           |       |   |      |      |      |       |      |       |      |      |     |     |      |     |       |     |      |     |    |     |
|---|-----------|-------|---|------|------|------|-------|------|-------|------|------|-----|-----|------|-----|-------|-----|------|-----|----|-----|
| 1 | BIOEC2015 | RVB27 | 1 | 58.1 | 32.6 | 25.5 | 149.0 | 4.50 | 115.0 | 2.44 | 0.80 | 7.1 | 110 | 6.2  | 1.6 | 600   | 225 | 25   | 184 | 15 |     |
| 1 | BIOEC2015 | RVB29 | 1 | 53.3 | 33.0 | 20.3 | 149.0 | 4.60 | 115.0 | 2.33 | 0.89 | 3.4 | 91  | 4.0  | 1.9 | 522   | 437 | 35   | 126 | 40 |     |
| 1 | BIOEC2015 | RVB29 | 3 | 57.4 | 34.7 | 22.7 | 150.0 | 4.80 | 116.0 | 2.33 | 0.94 | 4.0 | 98  | 4.6  | 1.7 | 611   | 499 | 37   | 116 | 43 | 5.2 |
| 1 | BIOEC2015 | RVB29 | 7 | 58.0 | 31.7 | 26.3 | 148.9 | 4.38 | 118.2 | 2.35 | 0.84 | 4.8 | 86  | 4.58 | 2.6 | 587.8 | 508 | 34.6 | 111 | 46 | 5.1 |
| 1 | BIOEC2015 | RVB32 | 1 | 44.1 | 28.2 | 15.9 | 149.0 | 4.40 | 115.0 | 2.22 | 1.05 | 5.4 | 105 | 3.8  | 2.1 | 1368  | 427 | 101  | 77  | 37 | 5.5 |
| 1 | BIOEC2015 | RVB32 | 3 | 52.5 | 34.4 | 18.1 | 147.0 | 4.50 | 109.0 | 2.46 | 1.42 | 4.3 | 114 | 5.9  | 2.8 | 380   | 350 | 36   | 54  | 41 | 5.1 |
| 1 | BIOEC2015 | RVB32 | 7 | 55.9 | 33.7 | 22.2 | 147.2 | 4.15 | 113.0 | 2.42 | 1.26 | 7.6 | 116 | 5.58 | 3.5 | 462.3 | 382 | 34.2 | 118 | 24 | 5.2 |
| 1 | BIOEC2015 | RVB35 | 1 | 47.5 | 23.2 | 24.3 | 148.1 | 4.58 | 121.8 | 2.27 | 1.09 | 4.2 | 76  | 3.6  | 2.1 | 1151  | 203 | 44   | 152 | 65 | 5.7 |
| 1 | BIOEC2015 | RVB35 | 3 | 60.1 | 31.4 | 28.7 | 145.9 | 4.17 | 111.5 | 2.35 | 0.69 | 4.6 | 89  | 5.97 | 2.7 | 795.8 | 223 | 27.3 | 99  | 39 | 4.8 |
| 1 | BIOEC2015 | RVB35 | 7 | 59.6 | 29.4 | 30.2 | 148.8 | 4.33 | 111.3 | 2.51 | 1.18 | 5.9 | 79  | 6.31 | 3.1 | 838   | 303 | 23.1 | 170 | 25 | 5.2 |
| 2 | Placebo   | RVB02 | 1 | 53.0 | 33.1 | 19.9 | 147.0 | 4.40 | 112.0 | 2.41 | 1.28 | 3.5 | 70  | 5.2  | 0.8 | 528   | 573 | 25   | 268 | 13 | 5.2 |
| 2 | Placebo   | RVB02 | 3 | 51.3 | 32.5 | 18.8 | 146.0 | 4.40 | 109.0 | 2.38 | 0.97 | 4.9 | 78  | 5.1  | 0.0 | 624   | 359 | 27   | 222 | 40 |     |

|   |         |       |   |      |      |      |           |      |           |      |      |     |     |     |      |          |     |          |     |          |     |
|---|---------|-------|---|------|------|------|-----------|------|-----------|------|------|-----|-----|-----|------|----------|-----|----------|-----|----------|-----|
| 2 | Placebo | RVB02 | 7 | 55.5 | 35.2 | 20.3 | 147.<br>0 | 4.30 | 113.<br>0 | 2.42 | 1.23 | 4.5 | 65  | 4.2 | 1.5  | 498      | 482 | 30       | 167 | 65       | 6.8 |
| 2 | Placebo | RVB05 | 1 | 29.0 | 15.4 | 13.6 | 147.<br>0 | 4.00 | 117.<br>0 | 1.82 | 0.52 | 5.7 | 120 | 2.5 | 0.7  | 159<br>1 | 275 | 34       | 228 | 25       | 4.8 |
| 2 | Placebo | RVB09 | 1 | 45.8 | 23.4 | 22.4 | 137.<br>0 | 3.90 | 101.<br>0 | 2.26 | 1.18 | 5.7 | 74  | 5.7 | 2.9  | 147<br>2 | 147 | 602      | 170 | 547      |     |
| 2 | Placebo | RVB09 | 3 | 41.0 | 16.0 | 25.0 | 137.<br>0 | 3.40 | 110.<br>0 | 2.30 | 1.00 | 7.1 | 130 | 7.7 | 18.0 | 110<br>4 | 29  | 125<br>1 | 176 | 151<br>1 |     |
| 2 | Placebo | RVB11 | 1 | 58.3 | 35.1 | 23.2 | 147.<br>0 | 4.60 | 113.<br>0 | 2.50 | 1.90 | 8.2 | 110 | 4.4 | 1.1  | 810      | 252 | 40       | 414 | 39       |     |
| 2 | Placebo | RVB11 | 3 | 56.0 | 32.0 | 24.0 | 143.<br>0 | 4.20 | 111.<br>0 | 2.50 | 1.60 | 5.1 | 99  | 7.0 | 2.0  | 869      | 129 | 105      | 162 | 566      |     |
| 2 | Placebo | RVB11 | 7 | 62.9 | 34.0 | 28.9 | 146.<br>0 | 4.70 | 113.<br>0 | 2.48 | 1.66 | 5.9 | 96  | 6.8 | 1.0  | 776      | 227 | 47       | 271 | 244      |     |
| 2 | Placebo | RVB12 | 1 | 54.6 | 30.0 | 24.6 | 147.<br>0 | 4.90 | 114.<br>0 | 2.37 | 1.67 | 3.3 | 85  | 4.6 | 1.9  | 281      | 297 | 33       | 111 | 21       |     |
| 2 | Placebo | RVB12 | 3 | 54.5 | 31.3 | 23.2 | 149.<br>0 | 5.20 | 113.<br>0 | 1.81 | 1.03 | 5.3 | 104 | 3.6 | 1.2  | 663      | 209 | 46       | 164 | 25       |     |
| 2 | Placebo | RVB20 | 1 | 53.7 | 34.3 | 19.4 | 150.<br>0 | 4.40 | 116.<br>0 | 2.57 | 1.54 | 4.1 | 95  | 4.8 | 3.1  | 397      | 267 | 29       | 62  | 23       | 4.8 |
| 2 | Placebo | RVB20 | 3 | 57.2 | 31.8 | 25.4 | 149.<br>0 | 4.60 | 113.<br>0 | 2.52 | 1.53 | 7.3 | 82  | 4.8 | 1.5  | 558      | 202 | 34       | 117 | 52       | 5.9 |
| 2 | Placebo | RVB20 | 7 | 55.5 | 33.6 | 21.9 | 146.<br>0 | 4.30 | 112.<br>0 | 2.48 | 1.24 | 5.4 | 88  | 3.7 | 1.6  | 544      | 112 | 37       | 84  | 25       | 6.6 |



|   |         |       |   |      |      |      |           |      |           |      |      |     |     |           |     |           |     |      |     |    |     |
|---|---------|-------|---|------|------|------|-----------|------|-----------|------|------|-----|-----|-----------|-----|-----------|-----|------|-----|----|-----|
| 2 | Placebo | RVB28 | 1 | 51.3 | 31.1 | 20.2 | 147.<br>0 | 5.00 | 112.<br>0 | 2.26 | 1.70 | 4.9 | 63  | 4.5       | 0.6 | 366       | 896 | 37   | 68  | 56 |     |
| 2 | Placebo | RVB30 | 1 | 58.0 | 36.9 | 21.1 | 146.<br>0 | 4.70 | 108.<br>0 | 2.69 | 1.30 | 3.8 | 102 | 4.7       | 4.7 | 464       | 112 | 40   | 267 | 55 | 4.2 |
| 2 | Placebo | RVB31 | 1 | 54.1 | 33.3 | 20.8 | 146.<br>0 | 4.50 | 107.<br>0 | 2.58 | 1.31 | 7.0 | 85  | 5.6       | 1.4 | 589       | 241 | 76   | 73  | 70 |     |
| 2 | Placebo | RVB31 | 3 | 60.3 | 35.8 | 24.5 | 148.<br>0 | 4.70 | 108.<br>0 | 2.53 | 1.29 | 7.0 | 83  | 10.5      | 1.7 | 648       | 381 | 57   | 107 | 85 | 5.5 |
| 2 | Placebo | RVB31 | 7 | 62.8 | 32.7 | 30.1 | 147.<br>1 | 4.78 | 110.<br>3 | 2.65 | 1.11 | 6.9 | 73  | 10.1<br>0 | 2.9 | 659.<br>9 | 354 | 50.4 | 114 | 76 | 5.5 |
| 2 | Placebo | RVB34 | 1 | 56.7 | 30.6 | 26.1 | 145.<br>7 | 4.34 | 114.<br>5 | 2.46 | 1.16 | 4.4 | 80  | 8.72      | 4.1 | 596.<br>2 | 557 | 46.0 | 117 | 17 | 5.0 |
| 2 | Placebo | RVB34 | 3 | 57.3 | 30.5 | 26.8 | 144.<br>6 | 4.11 | 114.<br>5 | 2.45 | 1.20 | 4.8 | 84  | 7.85      | 5.3 | 575.<br>4 | 436 | 51.3 | 67  | 37 | 4.4 |
| 2 | Placebo | RVB34 | 7 | 61.7 | 32.8 | 28.9 | 145.<br>8 | 4.12 | 112.<br>5 | 2.49 | 1.07 | 5.1 | 75  | 9.27      | 3.6 | 481.<br>4 | 545 | 41.1 | 153 | 23 | 5.2 |

TABLE A6. Biochemistry - laboratory and investigator comments.

| Group | Treatment | Patient No. | Visit No. | Lab Comment                                                                                                                                                                                                                                                                                                                                | Investigator Comment                                                                                              |
|-------|-----------|-------------|-----------|--------------------------------------------------------------------------------------------------------------------------------------------------------------------------------------------------------------------------------------------------------------------------------------------------------------------------------------------|-------------------------------------------------------------------------------------------------------------------|
| 1     | BIOEC2015 | RVB01       | 1         | Serum is very slightly haemolysed. This may falsely increase total protein, albumin, globulins, urea, cholesterol and potassium. Sodium, chloride, calcium, creatinine, ALT, amylase, lipase and CK may be decreased. Levels of phosphorus, bilirubin and ALP may be undetectable if haemolysis is severe. Repeat sampling is recommended. | Elevated Cholesterol NCS                                                                                          |
| 1     | BIOEC2015 | RVB01       | 3         | Serum is very slightly haemolysed. This may falsely increase total protein, albumin, globulins, urea, cholesterol and potassium. Sodium, chloride, calcium, creatinine, ALT, amylase, lipase and CK may be decreased. Levels of phosphorus, bilirubin and ALP may be undetectable if haemolysis is severe. Repeat sampling is recommended. |                                                                                                                   |
| 1     | BIOEC2015 | RVB01       | 7         |                                                                                                                                                                                                                                                                                                                                            | Potassium reduction not significant                                                                               |
| 1     | BIOEC2015 | RVB07       | 1         |                                                                                                                                                                                                                                                                                                                                            | Mild reduction of protein levels, mild clinical significance                                                      |
| 1     | BIOEC2015 | RVB08       | 1         |                                                                                                                                                                                                                                                                                                                                            |                                                                                                                   |
| 1     | BIOEC2015 | RVB08       | 7         |                                                                                                                                                                                                                                                                                                                                            | Elevated Alb, Chol, ALT, ALP. Decreased Globulin = NCS. Protein levels should be monitored - sent to external lab |
| 1     | BIOEC2015 | RVB08       | 3         |                                                                                                                                                                                                                                                                                                                                            | Elevated Tbil and low CK NCS                                                                                      |
| 1     | BIOEC2015 | RVB13       | 1         |                                                                                                                                                                                                                                                                                                                                            |                                                                                                                   |
| 1     | BIOEC2015 | RVB13       | 3         |                                                                                                                                                                                                                                                                                                                                            |                                                                                                                   |

A study investigating the efficacy of BIOEC2015 in reducing the clinical signs associated with canine inflammatory bowel disease (IBD)

FINAL

|   |           |       |   |                                                                                                                                                                                                                                                                                                                                         |                                                                                                                                                               |
|---|-----------|-------|---|-----------------------------------------------------------------------------------------------------------------------------------------------------------------------------------------------------------------------------------------------------------------------------------------------------------------------------------------|---------------------------------------------------------------------------------------------------------------------------------------------------------------|
| 1 | BIOEC2015 | RVB13 | 7 |                                                                                                                                                                                                                                                                                                                                         |                                                                                                                                                               |
| 1 | BIOEC2015 | RVB16 | 1 |                                                                                                                                                                                                                                                                                                                                         | Pan hypoproteinaemia due to protein losing enteropathy (PLE) Hypocholesterolaemia suspect due to PLE. Decreased CK and ALP NCS                                |
| 1 | BIOEC2015 | RVB16 | 3 |                                                                                                                                                                                                                                                                                                                                         | Albumin and globulin low: significant pan hypoproteinaemia but essentially unchanged significantly from previous. Ongoing hypocholesterolaemia. Low ALP NCS.  |
| 1 | BIOEC2015 | RVB16 | 7 | Serum is slightly lipemic. = This may falsely elevate total protein, albumin, globulins, potassium, phosphorus, calcium, bilirubin, ALT and cholesterol. It may falsely decrease sodium, chloride, urea, creatinine, CK, ALP, amylase and lipase. A repeat fasted sample is recommended.                                                | Hypocholesterolaemia could be clinically significant. Can be associated with protein losing enteropathy. However, both proteins are within normal limits now. |
| 1 | BIOEC2015 | RVB18 | 1 |                                                                                                                                                                                                                                                                                                                                         | increased urea clinically significant, could be associated with gastrointestinal haemorrhage or dehydration                                                   |
| 1 | BIOEC2015 | RVB18 | 3 | Serum is slightly haemolysed. = This may falsely increase total protein, albumin, globulins, urea, cholesterol and potassium. Sodium, chloride, calcium, creatinine, ALT, amylase, lipase and CK may be decreased. Levels of phosphorus, bilirubin and ALP may be undetectable if haemolysis is severe. Repeat sampling is recommended. |                                                                                                                                                               |
| 1 | BIOEC2015 | RVB18 | 7 |                                                                                                                                                                                                                                                                                                                                         |                                                                                                                                                               |
| 1 | BIOEC2015 | RVB27 | 1 |                                                                                                                                                                                                                                                                                                                                         | Decreased ALP NCS                                                                                                                                             |
| 1 | BIOEC2015 | RVB29 | 1 |                                                                                                                                                                                                                                                                                                                                         | Decreased Globulin NCS                                                                                                                                        |
| 1 | BIOEC2015 | RVB29 | 3 |                                                                                                                                                                                                                                                                                                                                         |                                                                                                                                                               |
| 1 | BIOEC2015 | RVB29 | 7 |                                                                                                                                                                                                                                                                                                                                         | High chloride and Low calcium NCS                                                                                                                             |

|   |           |       |   |                                                                                                                                                                                                                                                                                                                                             |                                                                                                                                                                                                                                                                                               |
|---|-----------|-------|---|---------------------------------------------------------------------------------------------------------------------------------------------------------------------------------------------------------------------------------------------------------------------------------------------------------------------------------------------|-----------------------------------------------------------------------------------------------------------------------------------------------------------------------------------------------------------------------------------------------------------------------------------------------|
| 1 | BIOEC2015 | RVB32 | 1 |                                                                                                                                                                                                                                                                                                                                             | Low globulin concentration and total protein considered likely to be associated with gastrointestinal disease. Increased amylase activity may be associated with borderline increase in cPLi supporting possible pancreatitis. Mild increase in ALT activity not clinically significant here. |
| 1 | BIOEC2015 | RVB32 | 3 |                                                                                                                                                                                                                                                                                                                                             | Mild hyperglobulinemia likely reflects underlying IBD. Other changes NCS                                                                                                                                                                                                                      |
| 1 | BIOEC2015 | RVB32 | 7 |                                                                                                                                                                                                                                                                                                                                             | Low globulin NCS                                                                                                                                                                                                                                                                              |
| 1 | BIOEC2015 | RVB35 | 1 |                                                                                                                                                                                                                                                                                                                                             | Low total protein and albumin consistent with IBD, high chloride NCS                                                                                                                                                                                                                          |
| 1 | BIOEC2015 | RVB35 | 3 | Lipaemia Index: None detected<br>Icterus Index: None detected<br>Haemolysis Index: None detected                                                                                                                                                                                                                                            | Low Inorganic Phosphorus NCS                                                                                                                                                                                                                                                                  |
| 1 | BIOEC2015 | RVB35 | 7 | Lipaemia Index: None detected<br>Icterus Index: None detected<br>Haemolysis Index: +                                                                                                                                                                                                                                                        | High cholesterol NCS                                                                                                                                                                                                                                                                          |
| 2 | Placebo   | RVB02 | 1 | Serum is very slightly haemolysed. = This may falsely increase total protein, albumin, globulins, urea, cholesterol and potassium. Sodium, chloride, calcium, creatinine, ALT, amylase, lipase and CK may be decreased. Levels of phosphorus, bilirubin and ALP may be undetectable if haemolysis is severe. Repeat sampling is recommended | Haemolysis only slight and not significant. Globulin not clinically significant. ALP not clinically significant                                                                                                                                                                               |
| 2 | Placebo   | RVB02 | 3 | Serum is very slightly haemolysed. = This may falsely increase total protein, albumin, globulins, urea, cholesterol and potassium. Sodium, chloride, calcium, creatinine, ALT, amylase, lipase and CK may be decreased. Levels of phosphorus, bilirubin and ALP may be undetectable if haemolysis is severe. Repeat sampling is recommended | Decreased Globulin NCS                                                                                                                                                                                                                                                                        |
| 2 | Placebo   | RVB02 | 7 |                                                                                                                                                                                                                                                                                                                                             | Globulin change is not clinically significant                                                                                                                                                                                                                                                 |

A study investigating the efficacy of BIOEC2015 in reducing the clinical signs associated with canine inflammatory bowel disease (IBD)

FINAL

|   |         |       |   |                                                                                                                                                                                                                                                                                                                                             |                                                                                                                                                                                                                                                                                                               |
|---|---------|-------|---|---------------------------------------------------------------------------------------------------------------------------------------------------------------------------------------------------------------------------------------------------------------------------------------------------------------------------------------------|---------------------------------------------------------------------------------------------------------------------------------------------------------------------------------------------------------------------------------------------------------------------------------------------------------------|
| 2 | Placebo | RVB05 | 1 |                                                                                                                                                                                                                                                                                                                                             | Pan hypoproteinaemia consistent with protein losing enteropathy, total hypocalcaemia related to hypoproteinaemia, hypophosphatemia may be related to vitamin D deficiency, hypocholesterolaemia likely related to intestinal malabsorption, increased amylase non-specific change of no clinical significance |
| 2 | Placebo | RVB09 | 1 |                                                                                                                                                                                                                                                                                                                                             | Decreased Tpro and Albumin due to IBD. Decreased Sodium, Chloride and elevated Tbil, Amylase, ALT and ALP NCS.                                                                                                                                                                                                |
| 2 | Placebo | RVB09 | 3 |                                                                                                                                                                                                                                                                                                                                             | Concerned about hypoalbuminemia, total bilirubinaemia and increased ALT and ALP. Withdrawn from trial and recommended further investigations. Clarification: Withdrawn from study due to weight loss and persistent diarrhoea (before receiving these results)                                                |
| 2 | Placebo | RVB11 | 1 | Serum is very slightly haemolysed. = This may falsely increase total protein, albumin, globulins, urea, cholesterol and potassium. Sodium, chloride, calcium, creatinine, ALT, amylase, lipase and CK may be decreased. Levels of phosphorus, bilirubin and ALP may be undetectable if haemolysis is severe. Repeat sampling is recommended | Elevated CK NCS                                                                                                                                                                                                                                                                                               |
| 2 | Placebo | RVB11 | 3 |                                                                                                                                                                                                                                                                                                                                             | Raised ALP and ALT NCS                                                                                                                                                                                                                                                                                        |
| 2 | Placebo | RVB11 | 7 |                                                                                                                                                                                                                                                                                                                                             |                                                                                                                                                                                                                                                                                                               |
| 2 | Placebo | RVB12 | 1 |                                                                                                                                                                                                                                                                                                                                             |                                                                                                                                                                                                                                                                                                               |
| 2 | Placebo | RVB12 | 3 |                                                                                                                                                                                                                                                                                                                                             | Hypocalcaemia often associated with GI disease                                                                                                                                                                                                                                                                |
| 2 | Placebo | RVB20 | 1 |                                                                                                                                                                                                                                                                                                                                             | Decreased Globulin. Raised Total bilirubin. Not clinically significant                                                                                                                                                                                                                                        |

|   |         |       |   |                                                                                    |                                                                                                             |
|---|---------|-------|---|------------------------------------------------------------------------------------|-------------------------------------------------------------------------------------------------------------|
| 2 | Placebo | RVB20 | 3 |                                                                                    |                                                                                                             |
| 2 | Placebo | RVB20 | 7 |                                                                                    | Glucose not of clinical significance                                                                        |
| 2 | Placebo | RVB28 | 1 |                                                                                    | Decreased Globulin NCS                                                                                      |
| 2 | Placebo | RVB30 | 1 |                                                                                    | High Total bilirubin NCS                                                                                    |
| 2 | Placebo | RVB31 | 1 |                                                                                    | Mild hyperglobulinemia could be associated with protein losing enteropathy, but no other supportive changes |
| 2 | Placebo | RVB31 | 3 |                                                                                    | High cholesterol NCS                                                                                        |
| 2 | Placebo | RVB31 | 7 |                                                                                    | High cholesterol NCS                                                                                        |
| 2 | Placebo | RVB34 | 1 |                                                                                    | Increased cholesterol Not clinically significant                                                            |
| 2 | Placebo | RVB34 | 3 |                                                                                    | Increased cholesterol and total bilirubin NCS                                                               |
| 2 | Placebo | RVB34 | 7 | Lipaemia Index: None detected. Icterus Index: None detected<br>Haemolysis Index: + | High Cholesterol NCS                                                                                        |

TABLE A7. Albumin results for both treatment groups.

| Parameter:       |           |             | Albumin |         |         |         |
|------------------|-----------|-------------|---------|---------|---------|---------|
| Units:           |           |             | g/l     |         |         |         |
| Reference range: |           |             | 28-39   |         |         |         |
| Group            | Treatment | Patient No. | Visit 1 | Visit 2 | Visit 3 | Visit 7 |
| 1                | BIOEC2015 | RVB01       | 34.8    | 34.4    | 36.7    | 35.3    |
| 1                | BIOEC2015 | RVB07       | 22.7    | 18.6    |         |         |
| 1                | BIOEC2015 | RVB08       | 31.2    | 30.1    | 31.5    | 42.0    |
| 1                | BIOEC2015 | RVB13       | 32.1    | 33.6    | 35.2    | 31.9    |
| 1                | BIOEC2015 | RVB16       | 27.8    | 25.6    | 26.4    | 30.6    |
| 1                | BIOEC2015 | RVB18       | 32.5    | 36.3    | 35.7    | 35.7    |
| 1                | BIOEC2015 | RVB27       | 32.6    |         |         |         |
| 1                | BIOEC2015 | RVB29       | 33.0    | 32.5    | 34.7    | 31.7    |
| 1                | BIOEC2015 | RVB32       | 28.2    | 33.4    | 34.4    | 33.7    |
| 1                | BIOEC2015 | RVB35       | 23.2    | 27.8    | 31.4    | 29.4    |
| 2                | Placebo   | RVB02       | 33.1    | 33.9    | 32.5    | 35.2    |
| 2                | Placebo   | RVB05       | 15.4    |         |         |         |
| 2                | Placebo   | RVB09       | 23.4    | 18.4    | 16.0    |         |
| 2                | Placebo   | RVB11       | 35.1    | 33.2    | 32.0    | 34.0    |
| 2                | Placebo   | RVB12       | 30.0    | 36.0    | 31.3    |         |

A study investigating the efficacy of BIOEC2015 in reducing the clinical signs associated with canine inflammatory bowel disease (IBD)

FINAL

---

|   |         |       |      |      |      |      |
|---|---------|-------|------|------|------|------|
| 2 | Placebo | RVB20 | 34.3 | 30.2 | 31.8 | 33.6 |
| 2 | Placebo | RVB28 | 31.1 | 33.4 |      |      |
| 2 | Placebo | RVB30 | 36.9 | 32.5 |      |      |
| 2 | Placebo | RVB31 | 33.3 | 35.1 | 35.8 | 32.7 |
| 2 | Placebo | RVB34 | 30.6 | 30.2 | 30.5 | 32.8 |



TABLE A8. Folate results for both treatment groups.

| Parameter:       |           |             | Folate   |         |         |
|------------------|-----------|-------------|----------|---------|---------|
| Units:           |           |             | ng/ml    |         |         |
| Reference range: |           |             | 6.5-11.5 |         |         |
| Group            | Treatment | Patient No. | Visit 1  | Visit 3 | Visit 7 |
| 1                | BIOEC2015 | RVB01       | 15.0     | 18.3    | 16.9    |
| 1                | BIOEC2015 | RVB07       | 11.8     |         |         |
| 1                | BIOEC2015 | RVB08       | 7.3      | 19.0    | 16.4    |
| 1                | BIOEC2015 | RVB13       | 17.2     | 17.2    | 18.1    |
| 1                | BIOEC2015 | RVB16       | 5.9      | >24.00  | 16.4    |
| 1                | BIOEC2015 | RVB18       | >24.00   | >24.00  | 9.2     |
| 1                | BIOEC2015 | RVB27       | 5.2      |         |         |
| 1                | BIOEC2015 | RVB29       | 14.3     | 18.1    | 16.4    |
| 1                | BIOEC2015 | RVB32       | 5.4      | 13.6    | 14.2    |
| 1                | BIOEC2015 | RVB35       | 6.1      | 16.1    | 9.5     |
| 2                | Placebo   | RVB02       | 9.7      | 14.3    | 13.7    |
| 2                | Placebo   | RVB05       | 9.2      |         |         |
| 2                | Placebo   | RVB09       | 9.4      | 18.5    |         |
| 2                | Placebo   | RVB11       | 8.9      | 14.2    | 17.2    |

---

|   |         |       |      |        |      |
|---|---------|-------|------|--------|------|
| 2 | Placebo | RVB12 | 13.9 |        |      |
| 2 | Placebo | RVB20 | 7.8  | >24.00 | 4.3  |
| 2 | Placebo | RVB28 | 6.4  |        |      |
| 2 | Placebo | RVB30 | 11.4 |        |      |
| 2 | Placebo | RVB31 | 10.8 | 15.2   | 12.5 |
| 2 | Placebo | RVB34 | 11.0 | 15.0   | 8.1  |

TABLE A9. Cobalamin results for both treatment groups.

| Parameter:       |           |             | Cobalamin |         |         |
|------------------|-----------|-------------|-----------|---------|---------|
| Units:           |           |             | ng/ml     |         |         |
| Reference range: |           |             | >200      |         |         |
| Group            | Treatment | Patient No. | Visit 1   | Visit 3 | Visit 7 |
| 1                | BIOEC2015 | RVB01       | 709.0     | 487.0   | 425.0   |
| 1                | BIOEC2015 | RVB07       | 153.0     |         |         |
| 1                | BIOEC2015 | RVB08       | 461.0     | 429.0   | 442.0   |
| 1                | BIOEC2015 | RVB13       | 237.0     | 265.0   | 171.0   |
| 1                | BIOEC2015 | RVB16       | 226.0     | 636.0   | 653.0   |
| 1                | BIOEC2015 | RVB18       | 257.0     | 1083.0  | 924.0   |
| 1                | BIOEC2015 | RVB27       | 177.0     |         |         |
| 1                | BIOEC2015 | RVB29       | 595.0     | 583.0   | 561.0   |
| 1                | BIOEC2015 | RVB32       | 268.0     | 530.0   | 458.0   |
| 1                | BIOEC2015 | RVB35       | 623.0     | 290.0   | 406.0   |
| 2                | Placebo   | RVB02       | 462.0     | 529.0   | 420.0   |
| 2                | Placebo   | RVB05       | <150.00   |         |         |
| 2                | Placebo   | RVB09       | <150.00   | >1200   |         |
| 2                | Placebo   | RVB11       | 361.0     | 433.0   | 454.0   |

A study investigating the efficacy of BIOEC2015 in reducing the clinical signs associated with canine inflammatory bowel disease (IBD)

FINAL

---

|   |         |       |        |        |       |
|---|---------|-------|--------|--------|-------|
| 2 | Placebo | RVB12 | 203.0  | 1001.0 |       |
| 2 | Placebo | RVB20 | 504.0  | 909.0  | 675.0 |
| 2 | Placebo | RVB28 | 585.0  |        |       |
| 2 | Placebo | RVB30 | 1052.0 |        |       |
| 2 | Placebo | RVB31 | 43.0   | 1062.0 | 803.0 |
| 2 | Placebo | RVB34 | >1200  | 562.0  | 418.0 |

TABLE A10. Screening blood tests.

| Parameter:       |           |             |           | cPLI  | TLI   | Cortisol | Cortisol - post ACTH |
|------------------|-----------|-------------|-----------|-------|-------|----------|----------------------|
| Units:           |           |             |           | ug/l  | ug/l  | nmol/l   | nmol/l               |
| Reference range: |           |             |           | 0-200 | 6-35  | <250     | <500                 |
| Group            | Treatment | Patient No. | Visit No. |       |       |          |                      |
| 1                | BIOEC2015 | RVB01       | 1         | 45.0  | 11.1  | 126.0    | 461.0                |
| 1                | BIOEC2015 | RVB07       | 1         | 61.0  | 42.0  | 71.2     | 61.7                 |
| 1                | BIOEC2015 | RVB08       | 1         | 40.0  | 23.6  | 48.9     | 244.0                |
| 1                | BIOEC2015 | RVB13       | 1         | 72.0  | 10.0  | 51.5     | 322.0                |
| 1                | BIOEC2015 | RVB16       | 1         | 111.0 | 10.7  | 73.8     | 498.0                |
| 1                | BIOEC2015 | RVB18       | 1         | 68.0  | 14.6  | 25.5     | 433.0                |
| 1                | BIOEC2015 | RVB27       | 1         | 43.0  | 29.4  | 166.0    | 245.0                |
| 1                | BIOEC2015 | RVB29       | 1         | 39.0  | 25.4  | 41.1     | 339.0                |
| 1                | BIOEC2015 | RVB32       | 1         | 316.0 | >50.0 | 30.3     | 345.0                |
| 1                | BIOEC2015 | RVB35       | 1         | 93.0  | 35.3  | 138.0    | 345.0                |
| 2                | Placebo   | RVB02       | 1         | 48.0  | 36.4  | 100.0    | 440.0                |
| 2                | Placebo   | RVB05       | 1         | 296.0 | 25.7  | 81.8     | 403.0                |
| 2                | Placebo   | RVB09       | 1         | 74.0  | 15.6  | 47.5     | 350.0                |
| 2                | Placebo   | RVB11       | 1         | 76.0  | 30.1  | 34.4     | 239.0                |
| 2                | Placebo   | RVB12       | 1         | 41.0  | 5.8   | 32.1     | 279.0                |

A study investigating the efficacy of BIOEC2015 in reducing the clinical signs associated with canine inflammatory bowel disease (IBD)

FINAL

---

|   |         |       |   |       |       |       |       |
|---|---------|-------|---|-------|-------|-------|-------|
| 2 | Placebo | RVB20 | 1 | 62.0  | 15.7  | 91.8  | 282.0 |
| 2 | Placebo | RVB28 | 1 | 54.0  | 25.4  | 122.0 | 400.0 |
| 2 | Placebo | RVB30 | 1 | 30.0  | 29.9  | 129.0 | 317.0 |
| 2 | Placebo | RVB31 | 1 | 89.0  | 30.4  | 207.0 | 400.0 |
| 2 | Placebo | RVB34 | 1 | 142.0 | >50.0 | 37.8  | 320.0 |

TABLE A11. Haematology results for treatment group 1.

| Parameter:        |               |             |           | WBC    | Neutrophils | Lymphocytes | Monocytes    | Eosinophils | Basophils | RBC         | Hgb   | HCT   | MCV   | MCH           | MCHC  | RDW   | Plt         | PCV |
|-------------------|---------------|-------------|-----------|--------|-------------|-------------|--------------|-------------|-----------|-------------|-------|-------|-------|---------------|-------|-------|-------------|-----|
| Units:            |               |             |           | 10e9/l | 10e9/l      | 10e9/l      | 10e9/l       | 10e9/l      | 10e9/l    | 10e12/<br>l | g/dL  | %     | fl    | pg            | g/dl  | %     | 10e9/l      | %   |
| Reference ranges: |               |             |           | 6-17.1 | 3-11.5      | 1-4.8       | 0.15-<br>1.5 | 0-1.3       | 0-0       | 5.5-8.5     | 12-18 | 37-55 | 60-77 | 19.5-<br>24.5 | 32-36 | N/A   | 150-<br>900 | N/A |
| Group             | Treatment     | Patient No. | Visit No. |        |             |             |              |             |           |             |       |       |       |               |       |       |             |     |
| 1                 | BIOEC20<br>15 | RVB0<br>1   | 1         | 14.39  | 11.22       | 2.30        | 0.43         | 0.43        | 0.00      | 8.08        | 19.20 | 56.30 | 69.70 | 23.70         | 34.00 | 12.80 | 186.0<br>0  | 54  |
| 1                 | BIOEC20<br>15 | RVB0<br>1   | 3         | 13.21  | 11.23       | 1.59        | 0.40         | 0.00        | 0.00      | 8.03        | 19.20 | 55.70 | 69.30 | 24.00         | 34.60 | 13.20 | 136.0<br>0  | 56  |
| 1                 | BIOEC20<br>15 | RVB0<br>1   | 7         | 10.85  | 8.14        | 2.17        | 0.33         | 0.22        | 0.00      | 7.68        | 18.40 | 54.50 | 71.00 | 24.00         | 33.80 | 13.50 | 215.0<br>0  | 53  |
| 1                 | BIOEC20<br>15 | RVB0<br>7   | 1         | 6.95   | 5.77        | 0.70        | 0.28         | 0.21        | 0.00      | 6.08        | 13.90 | 41.70 | 68.50 | 22.80         | 33.30 | 14.80 | 923.0<br>0  | 40  |
| 1                 | BIOEC20<br>15 | RVB0<br>8   | 1         | 14.10  | 9.87        | 2.40        | 0.42         | 1.41        | 0.00      | 6.98        | 16.90 | 49.50 | 70.90 | 24.20         | 34.20 | 12.30 | 344.0<br>0  | 51  |

A study investigating the efficacy of BIOEC2015 in reducing the clinical signs associated with canine inflammatory bowel disease (IBD)

FINAL

|   |               |           |   |       |      |      |      |      |      |      |       |       |       |       |       |       |            |    |
|---|---------------|-----------|---|-------|------|------|------|------|------|------|-------|-------|-------|-------|-------|-------|------------|----|
| 1 | BIOEC20<br>15 | RVB0<br>8 | 7 | 10.67 | 4.16 | 5.23 | 0.53 | 0.75 | 0.00 | 6.77 | 16.10 | 48.10 | 71.10 | 23.80 | 33.50 | 13.60 | 261.0<br>0 | 47 |
| 1 | BIOEC20<br>15 | RVB0<br>8 | 3 | 10.53 | 4.95 | 4.21 | 0.74 | 0.63 | 0.00 | 6.70 | 16.20 | 47.20 | 70.40 | 24.30 | 34.50 | 13.40 | 283.0<br>0 | 46 |
| 1 | BIOEC20<br>15 | RVB1<br>3 | 1 | 6.71  | 3.89 | 2.15 | 0.40 | 0.27 | 0.00 | 5.85 | 13.70 | 39.00 | 66.60 | 23.40 | 35.20 | 12.80 | 290.0<br>0 | 40 |
| 1 | BIOEC20<br>15 | RVB1<br>3 | 3 | 7.86  | 4.32 | 2.99 | 0.47 | 0.08 | 0.00 | 6.20 | 14.40 | 41.50 | 66.90 | 23.20 | 34.70 | 12.40 | 242.0<br>0 | 43 |
| 1 | BIOEC20<br>15 | RVB1<br>3 | 7 | 8.81  | 6.17 | 1.59 | 0.97 | 0.09 | 0.00 | 6.08 | 14.30 | 41.00 | 67.30 | 23.40 | 34.80 | 11.90 | 251.0<br>0 | 42 |
| 1 | BIOEC20<br>15 | RVB1<br>6 | 1 | 8.04  | 5.87 | 1.69 | 0.16 | 0.32 | 0.00 | 5.41 | 12.50 | 36.40 | 67.30 | 23.10 | 34.30 | 13.00 | 333.0<br>0 | 37 |
| 1 | BIOEC20<br>15 | RVB1<br>6 | 3 | 8.68  | 5.73 | 2.34 | 0.26 | 0.35 | 0.00 | 6.03 | 14.40 | 41.00 | 67.90 | 23.80 | 35.10 | 13.10 | 411.0<br>0 | 41 |
| 1 | BIOEC20<br>15 | RVB1<br>6 | 7 | 12.95 | 7.77 | 2.98 | 0.65 | 1.30 | 0.26 | 6.40 | 15.10 | 43.40 | 67.80 | 23.60 | 34.90 | 12.40 | 404.0<br>0 | 44 |
| 1 | BIOEC20<br>15 | RVB1<br>8 | 1 | 11.44 | 7.55 | 1.72 | 0.69 | 1.37 | 0.11 | 7.47 | 16.10 | 46.60 | 62.40 | 21.50 | 34.50 | 12.30 | 343.0<br>0 | 48 |
| 1 | BIOEC20<br>15 | RVB1<br>8 | 3 | 7.41  | 3.78 | 2.89 | 0.37 | 0.37 | 0.00 | 7.88 | 16.90 | 50.30 | 63.80 | 21.40 | 33.60 | 12.20 | 115.0<br>0 | 50 |
| 1 | BIOEC20<br>15 | RVB1<br>8 | 7 | 8.17  | 4.74 | 2.37 | 0.41 | 0.65 | 0.00 | 7.44 | 16.40 | 47.60 | 63.90 | 22.10 | 34.50 | 12.20 | 302.0<br>0 | 48 |

A study investigating the efficacy of BIOEC2015 in reducing the clinical signs associated with canine inflammatory bowel disease (IBD)

FINAL



|   |               |           |   |       |      |      |      |      |      |      |       |       |       |       |       |       |            |    |
|---|---------------|-----------|---|-------|------|------|------|------|------|------|-------|-------|-------|-------|-------|-------|------------|----|
| 1 | BIOEC20<br>15 | RVB2<br>7 | 1 | 7.72  | 5.40 | 0.85 | 0.46 | 1.00 | 0.00 | 7.94 | 18.00 | 52.10 | 65.70 | 22.70 | 34.60 | 11.80 | 324.0<br>0 | 53 |
| 1 | BIOEC20<br>15 | RVB2<br>9 | 1 | 5.08  | 3.25 | 1.17 | 0.30 | 0.36 | 0.00 | 6.23 | 14.70 | 42.40 | 68.00 | 23.60 | 34.70 | 12.00 | 175.0<br>0 | 43 |
| 1 | BIOEC20<br>15 | RVB2<br>9 | 3 | 4.52  | 3.39 | 0.50 | 0.23 | 0.41 | 0.00 | 6.27 | 15.00 | 42.70 | 68.20 | 23.90 | 35.10 | 12.10 | 176.0<br>0 | 47 |
| 1 | BIOEC20<br>15 | RVB2<br>9 | 7 | 4.91  | 3.39 | 0.93 | 0.29 | 0.29 | 0.00 | 6.72 | 15.80 | 47.80 | 71.10 | 23.50 | 33.10 | 11.70 | 171.0<br>0 | 47 |
| 1 | BIOEC20<br>15 | RVB3<br>2 | 1 | 8.41  | 5.63 | 1.26 | 0.50 | 0.93 | 0.08 | 6.61 | 16.20 | 45.10 | 68.20 | 24.50 | 35.90 | 11.70 | 224.0<br>0 | 46 |
| 1 | BIOEC20<br>15 | RVB3<br>2 | 3 | 4.34  | 2.17 | 1.87 | 0.22 | 0.09 | 0.00 | 6.62 | 16.50 | 48.40 | 73.00 | 25.00 | 34.20 | 11.70 | 156.0<br>0 | 46 |
| 1 | BIOEC20<br>15 | RVB3<br>2 | 7 | 5.72  | 3.03 | 1.94 | 0.34 | 0.40 | 0.00 | 6.54 | 16.20 | 48.40 | 73.90 | 24.80 | 33.50 | 11.20 | 169.0<br>0 | 48 |
| 1 | BIOEC20<br>15 | RVB3<br>5 | 1 | 10.96 | 9.32 | 0.88 | 0.66 | 0.11 | 0.00 | 6.63 | 17.10 | 50.50 | 76.20 | 25.90 | 33.90 | 13.90 | 294.0<br>0 | 52 |
| 1 | BIOEC20<br>15 | RVB3<br>5 | 3 | 6.00  | 4.38 | 1.32 | 0.18 | 0.12 | 0.00 | 7.65 | 18.60 | 56.80 | 74.20 | 24.30 | 32.80 | 12.70 | 304.0<br>0 | 55 |
| 1 | BIOEC20<br>15 | RVB3<br>5 | 7 | 6.02  | 4.64 | 0.96 | 0.30 | 0.12 | 0.00 | 7.41 | 18.10 | 55.50 | 74.80 | 24.50 | 32.70 | 12.70 | 354.0<br>0 | 55 |

TABLE A12. Laboratory and investigator comments on haematology results group 1.

| Group | Treatment | Patient No. | Visit No. | Lab Comment                                                                                                                                                                                                                                                                                                                                                                                                                                                                                                                                                | Investigator Comment                                                       |
|-------|-----------|-------------|-----------|------------------------------------------------------------------------------------------------------------------------------------------------------------------------------------------------------------------------------------------------------------------------------------------------------------------------------------------------------------------------------------------------------------------------------------------------------------------------------------------------------------------------------------------------------------|----------------------------------------------------------------------------|
| 1     | BIOEC2015 | RVB01       | 1         | PLT: Few small clumps seen RBC: 1+ polychromasia, 3+ echinocytosis WBC: Unremarkable morphology                                                                                                                                                                                                                                                                                                                                                                                                                                                            | Elevated HGB and HCT: NCS.                                                 |
| 1     | BIOEC2015 | RVB01       | 3         | PLT: Abundant small and large clumps seen at feathered edge, thus measured conc. is INVALID. Manual minimum estimate is >200 x 10 <sup>9</sup> /L RBC: Unremarkable WBC: Unremarkable                                                                                                                                                                                                                                                                                                                                                                      | Elevated HGB and HCT: NCS.<br>Low PLT: Invalid                             |
| 1     | BIOEC2015 | RVB01       | 7         | PLT: Low number of small clumps seen at feathered edge, thus true conc. is likely higher than measured. RBC: Unremarkable.<br>WBC: Reactive lymphocytes present.                                                                                                                                                                                                                                                                                                                                                                                           | Slight increase in haemoglobin concentration is not clinically significant |
| 1     | BIOEC2015 | RVB07       | 1         | PLT: Clumping in the feathered edge, thus measured concentration should be considered minimum value only. RBC:2+ eccentrocytosis. WBC: Unremarkable.<br>Interpretation: Eccentrocytosis indicates oxidative injury to the erythrocyte membranes. Mild lymphopenia is likely stress/glucocorticoid associated.                                                                                                                                                                                                                                              | Reduced lymphocytes NCS                                                    |
| 1     | BIOEC2015 | RVB08       | 1         | PLT: No clumps seen. RBC: occ. eccentrocytosis, 3+ echinocytosis. Occasional rouleaux. WBC: Reactive lymphocytes present, often with cleaved nucleus, occasionally nucleus appears convoluted on one side. Occasional hyper segmented neutrophils. The low numbers of eccentrocytes present may suggest a degree of oxidative damage. Neutrophil hyper segmentation may suggest a corticosteroid response. Mild eosinophilia, may reflect a hypersensitivity response, eg to parasite burden or allergen, less commonly noted as a paraneoplastic response | Eosinophils increased - likely due to hypersensitivity e.g. to parasites.  |
| 1     | BIOEC2015 | RVB08       | 7         | PLT: No clumps seen. RBC: Unremarkable morphology. WBC: Unremarkable morphology                                                                                                                                                                                                                                                                                                                                                                                                                                                                            | Raised Lymphocytes NCS                                                     |
| 1     | BIOEC2015 | RVB08       | 3         | PLT: Occ small clumps seen, thus true concentration is likely higher than measured RBC: 3+ echinocytosis WBC: Unremarkable morphology                                                                                                                                                                                                                                                                                                                                                                                                                      |                                                                            |

|   |           |       |   |                                                                                                                                                                      |                                                                                                    |
|---|-----------|-------|---|----------------------------------------------------------------------------------------------------------------------------------------------------------------------|----------------------------------------------------------------------------------------------------|
| 1 | BIOEC2015 | RVB13 | 1 | PLT: Low number of small clumps seen, thus true concentration is likely higher than measured. RBC: 1+ codocytosis. WBC: Reactive lymphocytes present.                |                                                                                                    |
| 1 | BIOEC2015 | RVB13 | 3 | PLT: Low number of small clumps seen at feathered edge, thus true conc. is likely higher than measured. RBC: 1+ codocytosis.<br>WBC: Unremarkable                    |                                                                                                    |
| 1 | BIOEC2015 | RVB13 | 7 | PLT: Low number of small clumps seen at feathered edge, thus true conc. is likely higher than measured. RBC: Occ. codocytosis, occ. keratocytosis. WBC: Unremarkable |                                                                                                    |
| 1 | BIOEC2015 | RVB16 | 1 | PLT: No clumps seen. RBC: 1+ codocytosis. WBC: Unremarkable morphology                                                                                               | Low RBC and HCT mild non-regenerative anaemia, suspect secondary to chronic inflammatory condition |
| 1 | BIOEC2015 | RVB16 | 3 | PLT: No clumps seen. Occ. macro platelets noted. RBC: Unremarkable. WBC: Reactive lymphocytes present.                                                               |                                                                                                    |
| 1 | BIOEC2015 | RVB16 | 7 | PLT: No clumps seen. RBC: 1+ codocytosis, smudged cells present (lipaemia). WBC: Reactive lymphocytes present.                                                       | Basophils NCS                                                                                      |
| 1 | BIOEC2015 | RVB18 | 1 | PLT: Low number of small clumps seen at feathered edge, thus true conc. is likely higher than measured. RBC: Unremarkable.<br>WBC: Reactive lymphocytes present      | Eosinophilia clinically significant, could be associated with parasites or hypersensitivity        |
| 1 | BIOEC2015 | RVB18 | 3 | PLT: Moderate number of large clumps seen, thus measured conc. is INVALID. Manual estimate: > 210 x10e9/L. RBC: Unremarkable. WBC: Reactive lymphocytes present      |                                                                                                    |
| 1 | BIOEC2015 | RVB18 | 7 | PLT: No clumps seen. RBC: 1+ polychromasia, WBC: Reactive lymphocytes present.                                                                                       |                                                                                                    |
| 1 | BIOEC2015 | RVB27 | 1 | PLT: No clumps seen. RBC: Unremarkable. WBC: Reactive lymphocytes present                                                                                            | Decreased Lymphocytes NCS                                                                          |
| 1 | BIOEC2015 | RVB29 | 1 | PLT: Occ. small clumps seen, thus true conc. is higher than measured. Macro platelets noted. RBC: Unremarkable.<br>WBC: Reactive lymphocytes present                 | Decreased WBC NCS                                                                                  |

|   |           |       |   |                                                                                                                                                                                                                                                                                                                                                                     |                                                                                                                 |
|---|-----------|-------|---|---------------------------------------------------------------------------------------------------------------------------------------------------------------------------------------------------------------------------------------------------------------------------------------------------------------------------------------------------------------------|-----------------------------------------------------------------------------------------------------------------|
| 1 | BIOEC2015 | RVB29 | 3 | PLT: No clumps seen. RBC: Unremarkable. WBC: Reactive lymphocytes present                                                                                                                                                                                                                                                                                           | Low WBC's and lymphocytes NCS                                                                                   |
| 1 | BIOEC2015 | RVB29 | 7 | PLT: Low number of small clumps seen, thus true conc. is higher than measured. RBC: Smudged cells present. WBC: Reactive lymphocytes present                                                                                                                                                                                                                        | Low WBC and lymphocytes not clinically significant                                                              |
| 1 | BIOEC2015 | RVB32 | 1 | PLT: Low number of small clumps seen, thus true conc. is higher than measured. RBC: Unremarkable. WBC: Reactive lymphocytes present                                                                                                                                                                                                                                 | Raised Basophils - Not Clinically significant                                                                   |
| 1 | BIOEC2015 | RVB32 | 3 | PLT: Occ. small clumps seen, thus true conc. is higher than measured. RBC: Unremarkable morphology. WBC: Low numbers of neutrophils display subtle cytoplasmic basophilia.<br>Neutropenia with possible slight toxicity raises concerns for overwhelming inflammation, but drug-induced neutropenia may also be considered, and breed-variation may also contribute | Decreased WBC; decreased neutrophils and raised MCH of no apparent clinical significance as clinically well dog |
| 1 | BIOEC2015 | RVB32 | 7 | PLT: No clumps seen. RBC: Unremarkable morphology<br>WBC: Reactive lymphocytes present                                                                                                                                                                                                                                                                              | Low WBC, high MCH NCS                                                                                           |
| 1 | BIOEC2015 | RVB35 | 1 | PLT: Moderate number of large clumps seen, thus true conc. is higher than measured. RBC: Unremarkable. WBC: Reactive lymphocytes present                                                                                                                                                                                                                            | Low lymphocytes and high MCH NCS                                                                                |
| 1 | BIOEC2015 | RVB35 | 3 | PLT: No clumps seen. RBC: Unremarkable morphology. WBC: Reactive lymphocytes present.                                                                                                                                                                                                                                                                               | High HGB and HCT NCS                                                                                            |
| 1 | BIOEC2015 | RVB35 | 7 | PLT: Low number of large clumps seen at feathered edge, thus true conc. is likely higher than measured. RBC: Unremarkable morphology. WBC: Unremarkable.                                                                                                                                                                                                            | Low lymphocytes. High HGB and HCT NCS                                                                           |

TABLE A13. Haematology results for treatment group 2.

| Parameter:        |            |             |           | WBC    | Neutrophils | Lymphocytes | Monocytes | Eosinophils | Basophils | RBC     | Hgb   | HCT   | MCV   | MCH       | MCHC  | RDW   | Plt     | PCV |
|-------------------|------------|-------------|-----------|--------|-------------|-------------|-----------|-------------|-----------|---------|-------|-------|-------|-----------|-------|-------|---------|-----|
| Units:            |            |             |           | 10e9/l | 10e9/l      | 10e9/l      | 10e9/l    | 10e9/l      | 10e9/l    | 10e12/l | g/dL  | %     | fL    | pg        | g/dl  | %     | 10e9/l  | %   |
| Reference ranges: |            |             |           | 6-17.1 | 3-11.5      | 1-4.8       | 0.15-1.5  | 0-1.3       | 0-0       | 5.5-8.5 | 12-18 | 37-55 | 60-77 | 19.5-24.5 | 32-36 | N/A   | 150-900 | N/A |
| Gro up            | Treat ment | Patient No. | Visit No. |        |             |             |           |             |           |         |       |       |       |           |       |       |         |     |
| 2                 | Place bo   | RVB02       | 1         | 11.42  | 7.88        | 2.63        | 0.69      | 0.23        | 0.00      | 6.65    | 15.40 | 46.00 | 69.20 | 23.20     | 33.50 | 12.00 | 255.00  | 44  |
| 2                 | Place bo   | RVB02       | 3         | 8.14   | 4.40        | 2.69        | 0.49      | 0.57        | 0.00      | 6.97    | 16.30 | 50.60 | 72.60 | 23.40     | 32.20 | 11.50 | 220.00  | 49  |
| 2                 | Place bo   | RVB02       | 7         | 9.25   | 5.46        | 2.96        | 0.09      | 0.74        | 0.00      | 6.72    | 16.10 | 47.80 | 71.10 | 23.90     | 33.60 | 12.80 | 253.00  | 46  |
| 2                 | Place bo   | RVB05       | 1         | 11.68  | 10.63       | 0.35        | 0.47      | 0.23        | 0.00      | 6.13    | 15.50 | 45.00 | 73.30 | 25.20     | 34.40 | 13.20 | 451.00  | 45  |
| 2                 | Place bo   | RVB09       | 1         | 9.37   | 6.93        | 1.22        | 0.56      | 0.66        | 0.00      | 7.64    | 17.00 | 51.20 | 66.90 | 22.20     | 33.20 | 11.80 | 323.00  | 52  |
| 2                 | Place bo   | RVB09       | 3         | 8.37   | 6.70        | 0.92        | 0.67      | 0.08        | 0.00      | 7.76    | 17.00 | 51.40 | 66.30 | 22.00     | 33.10 | 12.80 | 319.00  | 52  |

A study investigating the efficacy of BIOEC2015 in reducing the clinical signs associated with canine inflammatory bowel disease (IBD)

FINAL

|   |             |       |   |       |      |      |      |      |      |      |       |       |       |       |       |       |            |    |
|---|-------------|-------|---|-------|------|------|------|------|------|------|-------|-------|-------|-------|-------|-------|------------|----|
| 2 | Place<br>bo | RVB11 | 1 | 11.25 | 7.99 | 2.03 | 0.68 | 0.56 | 0.00 | 7.41 | 16.80 | 49.50 | 66.80 | 22.70 | 34.00 | 14.40 | 290.0<br>0 | 49 |
| 2 | Place<br>bo | RVB11 | 3 | 8.84  | 5.75 | 2.30 | 0.53 | 0.27 | 0.00 | 6.15 | 13.80 | 42.00 | 68.40 | 22.40 | 32.70 | 13.90 | 410.0<br>0 | 41 |
| 2 | Place<br>bo | RVB11 | 7 | 9.60  | 7.39 | 1.54 | 0.19 | 0.48 | 0.00 | 6.95 | 16.10 | 46.50 | 66.90 | 23.10 | 34.60 | 14.00 | 395.0<br>0 | 48 |
| 2 | Place<br>bo | RVB12 | 1 | 8.64  | 5.79 | 1.56 | 0.52 | 0.78 | 0.00 | 5.57 | 13.80 | 39.70 | 71.20 | 24.70 | 34.70 | 14.40 | 275.0<br>0 | 39 |
| 2 | Place<br>bo | RVB12 | 3 | 7.85  | 6.12 | 1.02 | 0.39 | 0.24 | 0.08 | 7.78 | 18.50 | 55.30 | 71.20 | 23.80 | 33.40 | 13.80 | 205.0<br>0 | 55 |
| 2 | Place<br>bo | RVB20 | 1 | 6.15  | 3.75 | 1.78 | 0.31 | 0.31 | 0.00 | 6.03 | 15.00 | 42.00 | 69.70 | 24.90 | 35.60 | 11.90 | 202.0<br>0 | 42 |
| 2 | Place<br>bo | RVB20 | 3 | 8.95  | 4.56 | 2.86 | 0.72 | 0.81 | 0.00 | 6.17 | 15.40 | 44.50 | 72.00 | 25.00 | 34.70 | 12.10 | 215.0<br>0 | 45 |
| 2 | Place<br>bo | RVB20 | 7 | 7.63  | 4.50 | 1.98 | 0.38 | 0.76 | 0.00 | 6.70 | 15.80 | 46.80 | 69.70 | 23.60 | 33.90 | 11.90 | 197.0<br>0 | 45 |
| 2 | Place<br>bo | RVB28 | 1 | 6.37  | 4.71 | 1.08 | 0.25 | 0.32 | 0.00 | 6.19 | 15.60 | 44.50 | 71.80 | 25.10 | 35.00 | 12.10 | 268.0<br>0 | 47 |
| 2 | Place<br>bo | RVB30 | 1 | 6.98  | 4.33 | 1.88 | 0.21 | 0.56 | 0.00 | 7.16 | 18.00 | 50.90 | 71.10 | 25.10 | 35.30 | 11.90 | 278.0<br>0 | 53 |
| 2 | Place<br>bo | RVB31 | 1 | 12.09 | 7.13 | 3.99 | 0.24 | 0.73 | 0.00 | 6.48 | 13.70 | 39.00 | 60.20 | 21.10 | 35.10 | 12.60 | 311.0<br>0 | 41 |
| 2 | Place<br>bo | RVB31 | 3 | 14.57 | 9.03 | 4.81 | 0.44 | 0.29 | 0.00 | 7.27 | 15.40 | 43.50 | 59.90 | 21.20 | 35.40 | 12.90 | 294.0<br>0 | 46 |

|   |         |       |   |       |       |      |      |      |      |      |       |       |       |       |       |       |        |    |
|---|---------|-------|---|-------|-------|------|------|------|------|------|-------|-------|-------|-------|-------|-------|--------|----|
| 2 | Placebo | RVB31 | 7 | 21.91 | 10.08 | 9.86 | 0.88 | 1.10 | 0.00 | 7.19 | 15.80 | 47.00 | 65.30 | 22.00 | 33.70 | 11.90 | 217.00 | 46 |
| 2 | Placebo | RVB34 | 1 | 10.67 | 5.12  | 4.05 | 0.75 | 0.75 | 0.00 | 6.86 | 16.20 | 48.60 | 70.80 | 23.60 | 33.40 | 11.50 | 238.00 | 49 |
| 2 | Placebo | RVB34 | 3 | 9.11  | 5.10  | 2.10 | 0.73 | 1.18 | 0.00 | 6.77 | 15.40 | 48.30 | 71.30 | 22.80 | 31.90 | 11.90 | 260.00 | 46 |
| 2 | Placebo | RVB34 | 7 | 8.56  | 5.74  | 1.97 | 0.09 | 0.77 | 0.00 | 7.63 | 17.80 | 53.80 | 70.50 | 23.30 | 33.10 | 11.60 | 184.00 | 51 |

TABLE A14. Laboratory and investigator comments on haematology results group 2.

| Group | Treatment | Patient No. | Visit No. | Lab Comment                                                                                                                                                                                                                                                                                                                                                                                                                                                                                                                                                                                                                                                             | Investigator Comment                                                                                          |
|-------|-----------|-------------|-----------|-------------------------------------------------------------------------------------------------------------------------------------------------------------------------------------------------------------------------------------------------------------------------------------------------------------------------------------------------------------------------------------------------------------------------------------------------------------------------------------------------------------------------------------------------------------------------------------------------------------------------------------------------------------------------|---------------------------------------------------------------------------------------------------------------|
| 2     | Placebo   | RVB02       | 1         | PLT: Occ small clumps seen, concentration will be higher RBC: 1+ codocytosis WBC: Reactive lymphocytes seen                                                                                                                                                                                                                                                                                                                                                                                                                                                                                                                                                             |                                                                                                               |
| 2     | Placebo   | RVB02       | 3         | PLT: Numerous small clumps. RBC: Unremarkable. WBC: Reactive lymphocytes present.                                                                                                                                                                                                                                                                                                                                                                                                                                                                                                                                                                                       | mild haemolysis NCS                                                                                           |
| 2     | Placebo   | RVB02       | 7         | PLT: No clumps seen. RBC: 1+ codocytosis WBC: Reactive lymphocytes present.                                                                                                                                                                                                                                                                                                                                                                                                                                                                                                                                                                                             | Monocytopenia not clinically significant                                                                      |
| 2     | Placebo   | RVB05       | 1         | PLT: Occ small clumps seen RBC: 3+ echinocytosis WBC: Unremarkable morphology                                                                                                                                                                                                                                                                                                                                                                                                                                                                                                                                                                                           | Low lymphocytes consistent with stress or excitement at time of sampling, high MCH not clinically significant |
| 2     | Placebo   | RVB09       | 1         | PLT: No clumps seen. Macro platelets present. RBC: Unremarkable. WBC: Unremarkable                                                                                                                                                                                                                                                                                                                                                                                                                                                                                                                                                                                      |                                                                                                               |
| 2     | Placebo   | RVB09       | 3         | PLT: No clumps seen RBC: 3+ echinocytosis WBC: Unremarkable morphology                                                                                                                                                                                                                                                                                                                                                                                                                                                                                                                                                                                                  | NCS                                                                                                           |
| 2     | Placebo   | RVB11       | 1         | PLT: Numerous small clumps seen at feathered edge, thus true conc. is likely higher than measured. RBC: 1+ anisocytosis. WBC: Reactive lymphocytes present                                                                                                                                                                                                                                                                                                                                                                                                                                                                                                              |                                                                                                               |
| 2     | Placebo   | RVB11       | 3         | PLT: Occ small clumps seen, thus true concentration is likely higher than measured RBC: 2+ acanthocytosis, 3+ echinocytosis WBC: Unremarkable morphology Interpretation: Moderate acanthocytosis reflects shear injury/microangiopathic disease; not previously reported in this patient. Consider checking for possible cardiac disease, splenic haemangiosarcoma or localised vasculitis if the cause is not clinically apparent.                                                                                                                                                                                                                                     |                                                                                                               |
| 2     | Placebo   | RVB11       | 7         | PLT: Low number of small clumps seen, thus true concentration is likely higher than measured. RBC: Unremarkable. WBC: Unremarkable                                                                                                                                                                                                                                                                                                                                                                                                                                                                                                                                      |                                                                                                               |
| 2     | Placebo   | RVB12       | 1         | PLT: Low number of small clumps seen, thus true concentration is likely higher than measured. RBC: 1+ anisocytosis, 1+ macrocytosis Occ. polychromasia, 1+ eccentrocytosis rare keratocytes WBC: Reactive lymphocytes present. Pyknotic cells are noted. Given that blood was obtained and run within a short period (according to submission form) the presence of pyknotic cells is of concern over a more rapid turnover of leukocytes, which may be seen with inflammatory disorders, or occasionally as a response to some drugs. The presence of eccentrocytes indicates oxidative damage. Keratocytes are more likely to reflect microangiopathic damage however | NCS                                                                                                           |



|   |         |       |   |                                                                                                                                                                                                                                                                                                                                                                                                                                                                                                                                                                                                                                                                                                                                                                                                                                                                       |                                                  |
|---|---------|-------|---|-----------------------------------------------------------------------------------------------------------------------------------------------------------------------------------------------------------------------------------------------------------------------------------------------------------------------------------------------------------------------------------------------------------------------------------------------------------------------------------------------------------------------------------------------------------------------------------------------------------------------------------------------------------------------------------------------------------------------------------------------------------------------------------------------------------------------------------------------------------------------|--------------------------------------------------|
| 2 | Placebo | RVB12 | 3 | PLT: Low number of small clumps seen, thus true concentration is likely higher than measured. RBC: 1+ anisocytosis, 1+ macrocytosis, 1+ polychromasia, occ. eccentrocytosis. WBC: Reactive lymphocytes present                                                                                                                                                                                                                                                                                                                                                                                                                                                                                                                                                                                                                                                        | NCS                                              |
| 2 | Placebo | RVB20 | 1 | PLT: No clumps seen. RBC: Occ. acanthocytosis. WBC: Reactive lymphocytes present, consistent with antigenic stimulation                                                                                                                                                                                                                                                                                                                                                                                                                                                                                                                                                                                                                                                                                                                                               | Raised MCH - Not clinically significant          |
| 2 | Placebo | RVB20 | 3 | PLT: Low number of small clumps seen at feathered edge, thus true conc. is likely higher than measured. RBC: Smudged cells present (Lipaemia). WBC: Reactive lymphocytes present                                                                                                                                                                                                                                                                                                                                                                                                                                                                                                                                                                                                                                                                                      | Increased MCH NCS                                |
| 2 | Placebo | RVB20 | 7 | PLT: No clumps seen. RBC: Unremarkable. WBC: Unremarkable.                                                                                                                                                                                                                                                                                                                                                                                                                                                                                                                                                                                                                                                                                                                                                                                                            |                                                  |
| 2 | Placebo | RVB28 | 1 | PLT: Low number of small clumps seen, thus true conc. is higher than measured. RBC: Unremarkable morphology. WBC: Reactive lymphocytes present.                                                                                                                                                                                                                                                                                                                                                                                                                                                                                                                                                                                                                                                                                                                       | High MCH NCS                                     |
| 2 | Placebo | RVB30 | 1 | PLT: No clumps seen. RBC: Unremarkable. WBC: Reactive lymphocytes present                                                                                                                                                                                                                                                                                                                                                                                                                                                                                                                                                                                                                                                                                                                                                                                             | High MCH NCS                                     |
| 2 | Placebo | RVB31 | 1 | PLT: Unremarkable. RBC: 1+ Anisocytosis, 1+ Codocytosis, rare polychromasia. WBC: Reactive lymphocytes present.                                                                                                                                                                                                                                                                                                                                                                                                                                                                                                                                                                                                                                                                                                                                                       | rare polychromasia NCS                           |
| 2 | Placebo | RVB31 | 3 | PLT: Occ. small clumps seen, thus true conc. is higher than measured. Macro platelets noted. RBC: 1+ anisocytosis, 1+ macrocytosis, 2+ microcytosis, 1+ polychromasia. WBC: Reactive lymphocytes present. PLT: Occasional small clumps present, thus true cons. is likely higher than measured. Occasional macro platelets seen. RBC: 2+ anisocytosis, 2+ macrocytosis, 1+ microcytosis, occ-1+ polychromasia; nRBCs were mostly metarubricytes. WBC: Moderate numbers of lymphocytes have increased amount of pale blue cytoplasm and rare lymphocytes have dark blue cytoplasm. Lymphocytosis is likely reactive. Slight regenerative picture without anaemia could be due to splenic contraction, recovery from previous anaemia, or possibly compensated blood loss. Low MCV is likely to be individual variability (given previous CBC result of similar value). | High Lymphocytes, low MCV NCS                    |
| 2 | Placebo | RVB31 | 7 | PLT: No clumps seen. RBC: 1+ polychromasia. WBC: Lymphocytes are intermediate size with irregularly round nuclei, stippled to clumped chromatin and moderate pale basophilic cytoplasm. Interpretation: Mild lymphocytosis may be reactive (due to chronic inflammation/antigenic stimulation) however a lymphoproliferative disease process (stage V lymphoma vs CLL) is also possible; further investigation (e.g. PARR on a buffy coat/imaging/aspiration of enlarged lymphoid organs) vs monitoring may be considered, depending on the overall clinical picture.                                                                                                                                                                                                                                                                                                 | High WBC and lymphocytes not clinically relevant |
| 2 | Placebo | RVB34 | 1 | PLT: Low number of small clumps seen at feathered edge, thus true conc. is likely higher than measured. RBC: Unremarkable. WBC: Reactive lymphocytes present.                                                                                                                                                                                                                                                                                                                                                                                                                                                                                                                                                                                                                                                                                                         |                                                  |
| 2 | Placebo | RVB34 | 3 | PLT: No clumps seen. RBC: Unremarkable morphology. WBC: Reactive lymphocytes present                                                                                                                                                                                                                                                                                                                                                                                                                                                                                                                                                                                                                                                                                                                                                                                  | decreased MCHC NCS                               |
| 2 | Placebo | RVB34 | 7 | PLT: Low number of small clumps seen at feathered edge, thus true conc. is likely higher than measured. RBC: Unremarkable. WBC: Reactive lymphocytes present.                                                                                                                                                                                                                                                                                                                                                                                                                                                                                                                                                                                                                                                                                                         | Low monocytes NCS                                |

A study investigating the efficacy of BIOEC2015 in reducing the clinical signs associated with canine inflammatory bowel disease (IBD)

FINAL



TABLE A15. Urinalysis Group 1.

| Group | Treatment | Patient No. | Visit No. | Urine Collection Method | Urine Specific Gravity | Urine-pH | Urine Dip Stick *        | Urine Sediment                                                                                                                                                                                            | Investigator Comment |
|-------|-----------|-------------|-----------|-------------------------|------------------------|----------|--------------------------|-----------------------------------------------------------------------------------------------------------------------------------------------------------------------------------------------------------|----------------------|
| 1     | BIOEC2015 | RVB01       | 1         | Free Catch              | >1.050                 | 6        | Bilirubin 2+             | Urine colour: dull yellow coloured and cloudy. RBC = 0-10 per HPF (x400) WBC = 0-1 per HPF (x400). Fat droplets, very occasional epithelial cell.                                                         | Bilirubin 2+ NCS     |
| 1     | BIOEC2015 | RVB01       | 3         | Free Catch              | 1.050                  | 6        | Protein 1+, Bilirubin 1+ | Urine colour: amber coloured and turbid. RBC = 0-10 per HPF (x400) WBC = 0-1 per HPF (x400). Some stained/organic debris. Few fat droplets. Spermatozoa.                                                  |                      |
| 1     | BIOEC2015 | RVB01       | 7         | Unable to obtain        |                        |          |                          |                                                                                                                                                                                                           |                      |
| 1     | BIOEC2015 | RVB07       | 1         | Free Catch              | 1.014                  | 7.5      | Bilirubin 1+             | urine colour : yellow coloured and slightly cloudy = Rbc = 0 - 10 per HPF (x400)<br>Wbc = 0 - 1 per HPF (x400)<br>some stained/organic debris<br>few fat droplets<br>occasional epithelial cell           |                      |
| 1     | BIOEC2015 | RVB08       | 1         | Free Catch              | 1.025                  | 6        | Bilirubin 1+             | urine colour : yellow coloured and clear<br>Rbc = 0 - 10 per HPF (x400)<br>Wbc = 5 - 20 per HPF (x400)<br>occasional bilirubin crystals<br>occasional spermatozoa<br>occasional squamous epithelial cells | Bilirubin 1+ NCS     |
| 1     | BIOEC2015 | RVB08       | 7         | Free Catch              | 1.045                  | 5.5      | Negative                 | urine colour : amber and clear =<br>Rbc = 0 - 10 per HPF (x400)<br>Wbc = 0 - 1 per HPF (x400)<br>spermatozoa                                                                                              |                      |

|   |           |       |   |                                                     |       |     |                                  |                                                                                                                                                                                                                                               |                                                       |
|---|-----------|-------|---|-----------------------------------------------------|-------|-----|----------------------------------|-----------------------------------------------------------------------------------------------------------------------------------------------------------------------------------------------------------------------------------------------|-------------------------------------------------------|
| 1 | BIOEC2015 | RVB08 | 3 | Free Catch                                          | 1.034 | 6   | Bilirubin 1+                     | urine colour : yellow coloured and cloudy<br>Rbc = 0 - 10 per HPF (x400)<br>Wbc = 1 - 5 per HPF (x400)<br>some pigmented debris<br>spermatozoa                                                                                                | Bilirubin 1+ NCS                                      |
| 1 | BIOEC2015 | RVB13 | 1 | Free Catch                                          | 1.036 | 6.5 | Bilirubin 1+                     | urine colour : dark yellow coloured and clear<br>= Rbc = 0 - 10 per HPF (x400)<br>Wbc = 0 - 1 per HPF (x400)<br>debris few fat droplets<br>occasional squamous epithelial cell                                                                | Bilirubin 1+ NCS                                      |
| 1 | BIOEC2015 | RVB13 | 3 | Free Catch                                          | 1.035 | 6   | Bilirubin 2+                     | urine colour : yellow coloured and clear<br>Rbc = 0 - 10 per HPF (x400)<br>Wbc = 0 - 1 per HPF (x400)<br>no significant deposit                                                                                                               | Not clinically significant                            |
| 1 | BIOEC2015 | RVB13 | 7 | Free Catch                                          | 1.045 | 5.5 | Protein trace<br>Bilirubin trace | Urine colour: Orange/ yellow coloured and clear. = Rbc = 0 - 10 per HPF (x400)<br>Wbc = 0 - 1 per HPF (x400)<br>Some stained/organic debris<br>Occasional squamous epithelial cell.                                                           | NCS                                                   |
| 1 | BIOEC2015 | RVB16 | 1 | Expressed bladder under GA                          | 1.010 | 7   | Negative                         | Urine colour: Straw coloured and slightly cloudy. = Rbc = 0 - 10 per HPF (x400)<br>Wbc = 0 - 1 per HPF (x400)<br>Stained, granular aggregates, size and shape suggestive of granular cast fragments.                                          | SG result NCS, on intravenous fluids                  |
| 1 | BIOEC2015 | RVB16 | 3 | Free Catch                                          | 1.032 | 6.5 | Blood 4+                         | urine colour : yellow coloured and cloudy<br>Rbc = 100 - 200 per HPF (x400)<br>Wbc = 1 - 5 per HPF (x400) fat droplets<br>epithelial cells                                                                                                    | Blood - may be significant but from manual expression |
| 1 | BIOEC2015 | RVB16 | 7 | Not collected                                       |       |     |                                  |                                                                                                                                                                                                                                               |                                                       |
| 1 | BIOEC2015 | RVB18 | 1 | Expressed bladder manually whilst under anaesthetic | 1.016 | 7.5 | Bilirubin 1+                     | urine colour : pale yellow coloured and cloudy = Rbc = 0 - 10 per HPF (x400)<br>Wbc = 0 - 2 per HPF (x400) some pigmented debris amorphous clear crystals (most commonly phosphates or calcium oxalates )<br>epithelial cell few fat droplets | Bilirubin 1+ NCS<br>SG 1.016 - on intravenous fluids  |

|   |           |       |   |                                                                     |       |     |                                             |                                                                                                                                                                                                                                        |                                                                                        |
|---|-----------|-------|---|---------------------------------------------------------------------|-------|-----|---------------------------------------------|----------------------------------------------------------------------------------------------------------------------------------------------------------------------------------------------------------------------------------------|----------------------------------------------------------------------------------------|
| 1 | BIOEC2015 | RVB18 | 3 | Free catch for U/A, Manually expressed bladder under GA for storage | 1.031 | 5   | Negative                                    | urine colour : yellow coloured and slightly cloudy = Rbc = 0 - 10 per HPF (x400)<br>Wbc = 0 - 2 per HPF (x400) some stained debris few fat droplets 1 x hyaline casts with fatty inclusions seen in 81 HPF (x400) epithelial cells     | Not clinically significant                                                             |
| 1 | BIOEC2015 | RVB18 | 7 | None collected                                                      |       |     |                                             |                                                                                                                                                                                                                                        |                                                                                        |
| 1 | BIOEC2015 | RVB27 | 1 | Unable to collect                                                   |       |     |                                             |                                                                                                                                                                                                                                        |                                                                                        |
| 1 | BIOEC2015 | RVB29 | 1 | Free Catch                                                          | 1.024 | 6.5 | Bilirubin 2+, blood trace                   | urine colour : yellow coloured and cloudy<br>Rbc = 0 - 10 per HPF (x400)<br>Wbc = 0 - 1 per HPF (x400)<br>many fat droplets very occasional epithelial cell                                                                            | Bilirubin 2+ and trace blood NCS                                                       |
| 1 | BIOEC2015 | RVB29 | 3 | Free Catch                                                          | 1.020 | 8   | Protein 1+                                  | Urine colour: Yellow coloured and cloudy<br>Rbc = 0 - 10 per HPF (x400)<br>Wbc = 0 - 1 per HPF (x400)<br>Organic debris. Unstained, clear granular debris. Occasional epithelial cell.                                                 | Protein 1+ NCS                                                                         |
| 1 | BIOEC2015 | RVB29 | 7 | Free Catch                                                          | 1.019 | 6   | Nitrite positive, blood trace protein trace | urine colour : yellow coloured and cloudy<br>Rbc = 0 - 10 per HPF (x400)<br>Wbc = 0 - 2 per HPF (x400)<br>bacteria (rods) amorphous clear crystals (most commonly phosphates or calcium oxalates ) occasional squamous epithelial cell | Nitrite positive not clinically significant, likely contamination as free catch sample |
| 1 | BIOEC2015 | RVB32 | 1 | Free Catch                                                          | 1.023 | 8   | Protein trace, bilirubin 1+                 | urine colour : yellow coloured and cloudy<br>Rbc = 0 - 10 per HPF (x400)<br>Wbc = 0 - 1 per HPF (x400)<br>fat droplets                                                                                                                 | Protein trace and bilirubin 1+ not clinically significant                              |
| 1 | BIOEC2015 | RVB32 | 3 | Free Catch                                                          | 1.037 | 7   | Protein trace, 2+ bilirubin                 | urine colour : yellow coloured and cloudy<br>Rbc = 0 - 10 per HPF (x400)<br>Wbc = 0 - 1 per HPF (x400)<br>many fat droplets                                                                                                            | Protein trace and 2+ bilirubin not clinically significant                              |

|   |           |       |   |            |       |     |               |                                                                                                                                                        |                 |
|---|-----------|-------|---|------------|-------|-----|---------------|--------------------------------------------------------------------------------------------------------------------------------------------------------|-----------------|
| 1 | BIOEC2015 | RVB32 | 7 | Free Catch | 1.038 | 9   | Protein 3+    | urine colour : yellow coloured and turbid =<br>Rbc = 0 - 10 per HPF (x400)<br>Wbc = 0 - 1 per HPF (x400)<br>many fat droplets                          | Protein 3+ NCS  |
| 1 | BIOEC2015 | RVB35 | 1 | Free Catch | 1.018 | 8.5 | Trace protein | Urine colour: straw coloured and slightly cloudy = Rbc = 0 - 10 per HPF (x400)<br>Wbc = 0 - 1 per HPF (x400)<br>Few fat droplets.                      |                 |
| 1 | BIOEC2015 | RVB35 | 3 | Free Catch | 1.030 | 6.5 | Negative      | Urine colour : yellow coloured and very slightly cloudy = Rbc = 0 - 10 per HPF (x400)<br>Wbc = 0 - 1 per HPF (x400)<br>some debris<br>few fat droplets |                 |
| 1 | BIOEC2015 | RVB35 | 7 | Free Catch | 1.035 | 7   | Blood trace   | Urine colour: pale orange coloured and cloudy = Rbc = 5 - 10 per HPF (x400)<br>Wbc = 1 - 3 per HPF (x400)<br>Triple phosphate crystals.                | Blood trace NCS |

\*Negative results on urine dip stick not listed in table.

NCS = not clinically significant.

TABLE A16. Urinalysis Group 2

| Group | Treatment | Patient No. | Visit No. | Urine Collection Method | Urine Specific Gravity | Urine-pH | Urine Dip Stick *        | Urine Sediment                                                                                                                                                                                                                                   | Investigator Comment                                                                          |
|-------|-----------|-------------|-----------|-------------------------|------------------------|----------|--------------------------|--------------------------------------------------------------------------------------------------------------------------------------------------------------------------------------------------------------------------------------------------|-----------------------------------------------------------------------------------------------|
| 2     | Placebo   | RVB02       | 1         | Free Catch              | 1.043                  | 6        | Negative                 | Urine colour: yellow and turbid. RBC = 0-10 per HPF (x400) WBC = 0-1 per HPF (x400). Many Fat droplets                                                                                                                                           | Trace of blood likely as a result of cystocentesis sampling (i.e. iatrogenic bleeding)        |
| 2     | Placebo   | RVB02       | 3         | Unable to obtain        | >1.050                 |          |                          |                                                                                                                                                                                                                                                  |                                                                                               |
| 2     | Placebo   | RVB02       | 7         | Free Catch              | 1.040                  | 9        | Negative                 | Urine colour: straw coloured and cloudy. RBC = 0-10 per HPF (x400) WBC = 0-1 per HPF (x400). Some stained/organic debris. Triple phosphate crystals. Amorphous clear crystals (may be phosphates or calcium oxalates) occasional epithelial cell |                                                                                               |
| 2     | Placebo   | RVB05       | 1         | Free Catch              | 1.046                  | 6        | Protein 1+, Bilirubin 2+ | Urine Colour : amber and cloudy = RBC = 0 - 10 per HPF (x400) WBC = 0 - 1 per HPF (x400) Some stained/organic debris Fat droplets Some epithelial cell                                                                                           | Protein 1+ considered normal for highly concentrated urine, \bilirubin 2+ normal for male dog |
| 2     | Placebo   | RVB09       | 1         | Free Catch              | 1.016                  | 5        | Negative                 | urine colour : yellow coloured and clear = Rbc = 1 - 10 per HPF (x400) Wbc = 0 - 1 per HPF (x400) occasional epithelial cell                                                                                                                     |                                                                                               |
| 2     | Placebo   | RVB09       | 3         | None collected          |                        |          |                          |                                                                                                                                                                                                                                                  |                                                                                               |
| 2     | Placebo   | RVB11       | 1         | Free Catch              | >1.050                 | 6.5      | Trace protein            | urine colour : yellow coloured and slightly cloudy = Rbc = 0 - 10 per HPF (x400) Wbc = 25 - 50 per HPF (x400) few fat droplets squamous epithelial cells spermatozoa                                                                             | WBC in sediment NCS                                                                           |

A study investigating the efficacy of BIOEC2015 in reducing the clinical signs associated with canine inflammatory bowel disease (IBD)

FINAL

|   |         |       |   |                   |        |     |                                   |                                                                                                                                                                                                                                        |                                                                                                      |
|---|---------|-------|---|-------------------|--------|-----|-----------------------------------|----------------------------------------------------------------------------------------------------------------------------------------------------------------------------------------------------------------------------------------|------------------------------------------------------------------------------------------------------|
| 2 | Placebo | RVB11 | 3 | Free Catch        | 1.033  | 6   | Protein 1+                        | urine colour : yellow and cloudy =<br>Rbc = 0 - 10 per HPF (x400)<br>Wbc = 0 - 1 per HPF (x400)<br>spermatozoa Debris - some spherical<br>yellow/green artefacts, possible<br>contaminant if free catch/floor sample                   | Protein 1+ NCS                                                                                       |
| 2 | Placebo | RVB11 | 7 | Free Catch        | 1.039  | 5   | Trace<br>protein<br>Blood 2+      | urine colour : yellow coloured and clear =<br>Rbc = 0 - 10 per HPF (x400)<br>Wbc = 0 - 1 per HPF (x400) very little debris                                                                                                             | Blood 2+ NCS                                                                                         |
| 2 | Placebo | RVB12 | 1 | cystocentesis     | >1.050 | 6.5 | Negative                          | Urine colour: amber coloured and cloudy. =<br>Rbc = 0 - 10 per HPF (x400)<br>Wbc = 0 - 1 per HPF (x400)<br>Occasional triple phosphate crystal. Many<br>fat droplets                                                                   |                                                                                                      |
| 2 | Placebo | RVB12 | 3 | None<br>collected |        |     |                                   |                                                                                                                                                                                                                                        |                                                                                                      |
| 2 | Placebo | RVB20 | 1 | Cystocentesis     | 1.013  | 8.5 | Bilirubin 1+                      | urine colour : straw coloured and clear =<br>Rbc = 0 - 10 per HPF (x400)<br>Wbc = 0 - 1 per HPF (x400)<br>few fat droplets                                                                                                             | Bilirubin 1+ Not<br>clinically significant                                                           |
| 2 | Placebo | RVB20 | 3 | Free Catch        | 1.042  | 6.5 | Trace<br>protein                  | Urine colour: Yellow coloured and cloudy. =<br>Rbc = 0 - 10 per HPF (x400)<br>Wbc = 3 - 10 per HPF (x400)<br>Few fat droplets. Few squamous epithelial<br>cells.                                                                       |                                                                                                      |
| 2 | Placebo | RVB20 | 7 | Free catch        | 1.034  | 6.5 | Protein 1+,<br>bilirubin 1+       | urine colour : yellow coloured and cloudy =<br>Rbc = 0 - 10 per HPF (x400)<br>Wbc = 50 - 75 per HPF (x400) triple<br>phosphate crystals squamous epithelial cells                                                                      | sediment and white<br>blood cells, 1+<br>protein and 1+<br>bilirubin not of<br>clinical significance |
| 2 | Placebo | RVB28 | 1 | Free Catch        | 1.042  | 8   | Protein<br>trace,<br>Bilirubin 1+ | urine colour : yellow coloured and cloudy =<br>Rbc = 0 - 10 per HPF (x400)<br>Wbc = 0 - 1 per HPF (x400)<br>many fat droplets triple phosphate crystals<br>amorphous clear crystals (most commonly<br>phosphates or calcium oxalates ) | Bilirubin 1+ NCS                                                                                     |

A study investigating the efficacy of BIOEC2015 in reducing the clinical signs associated with canine inflammatory bowel disease (IBD)

FINAL



|   |         |       |   |            |        |     |                                |                                                                                                                                                                                  |                                                                |
|---|---------|-------|---|------------|--------|-----|--------------------------------|----------------------------------------------------------------------------------------------------------------------------------------------------------------------------------|----------------------------------------------------------------|
| 2 | Placebo | RVB30 | 1 | Free Catch | 1.035  | 6   | Bilirubin 1+                   | urine colour : yellow coloured and slightly cloudy = Rbc = 0 - 10 per HPF (x400)<br>Wbc = 0 - 1 per HPF (x400)<br>few fat droplets                                               | Bilirubin 1+ NCS                                               |
| 2 | Placebo | RVB31 | 1 | Free Catch | >1.050 | 6.5 | Protein 1+<br>Ketones trace    | Urine colour: yellow coloured and cloudy. =<br>Rbc = 0 - 10 per HPF (x400)<br>Wbc = 0 - 1 per HPF (x400)<br>Triple phosphate crystals.<br>Occasional epithelial cell             | Protein 1+, ketones trace and triple phosphate crystals<br>NCS |
| 2 | Placebo | RVB31 | 3 | Free Catch | 1.025  | 5.5 | Negative                       | Urine colour: Straw coloured and slightly cloudy = Rbc = 0 - 10 per HPF (x400)<br>Wbc = 0 - 1 per HPF (x400)<br>Some stained/ organic debris.<br>Very occasional epithelial cell |                                                                |
| 2 | Placebo | RVB31 | 7 | Free Catch | 1.050  | 5   | protein trace                  | urine colour : amber coloured and clear =<br>Rbc = 0 - 10 per HPF (x400)<br>Wbc = 0 - 1 per HPF (x400)<br>some stained/organic debris few fat droplets                           |                                                                |
| 2 | Placebo | RVB34 | 1 | Free Catch | 1.031  | 8   | Protein trace,<br>bilirubin 1+ | urine colour : yellow coloured and cloudy =<br>Rbc = 0 - 10 per HPF (x400)<br>Wbc = 0 - 1 per HPF (x400)<br>fat droplets squamous epithelial cells                               | Bilirubin 1+ not clinically significant                        |
| 2 | Placebo | RVB34 | 3 | Free Catch | 1.044  | 5.5 | bilirubin 2+                   | Urine colour: orange coloured and cloudy =<br>Rbc = 0 - 10 per HPF (x400)<br>Wbc = 0 - 1 per HPF (x400)<br>Squamous epithelial cells.<br>Fat droplets.                           | Bilirubin 2+ NCS                                               |
| 2 | Placebo | RVB34 | 7 | Free Catch | 1.050  | 5.5 | Protein trace,<br>Bilirubin 2+ | Urine colour: orange coloured and slightly cloudy = Rbc = 0 - 10 per HPF (x400)<br>Wbc = 0 - 1 per HPF (x400)<br>Occasional squamous epithelial cell. Fat droplets.              | Bilirubin 2+ NCS                                               |

\*Negative results on urine dip stick not listed in table.

NCS = not clinically significant.

TABLE A17. Faecal tests.

| Group | Treatment | Patient No. | Visit No. | Faecal Culture Result                                                                | Faecal Culture - Lab Comment                                                                                                                | Faecal Parasites - Endo-egg count                             | Investigator comment                                                                                                                                                                                                                  |
|-------|-----------|-------------|-----------|--------------------------------------------------------------------------------------|---------------------------------------------------------------------------------------------------------------------------------------------|---------------------------------------------------------------|---------------------------------------------------------------------------------------------------------------------------------------------------------------------------------------------------------------------------------------|
| 1     | BIOEC2015 | RVB01       | 1         | -ve                                                                                  | Normal Faecal flora isolated                                                                                                                | no faecal eggs or coccidia oocysts seen                       |                                                                                                                                                                                                                                       |
| 1     | BIOEC2015 | RVB07       | 1         | -ve                                                                                  | Normal faecal flora only                                                                                                                    | no faecal eggs or coccidia oocysts seen                       |                                                                                                                                                                                                                                       |
| 1     | BIOEC2015 | RVB08       | 1         | -ve                                                                                  | Normal faecal flora only                                                                                                                    | no faecal eggs or coccidia oocysts seen                       |                                                                                                                                                                                                                                       |
| 1     | BIOEC2015 | RVB13       | 1         |                                                                                      |                                                                                                                                             |                                                               |                                                                                                                                                                                                                                       |
| 1     | BIOEC2015 | RVB16       | 1         | Growth of campylobacter spp. isolated after 48 hours incubation                      | Growth of Campylobacter spp. isolated after 48 hours incubation. The isolated Campylobacter spp. has been identified as Campylobacter coli. | No faecal eggs or coccidia oocysts seen                       | Clinical significance unknown as can be present in clinically well patients. In the absence of haemorrhagic diarrhoea, significance of campylobacter spp. tenuous. I would not ascribe any clinical significance to this observation. |
| 1     | BIOEC2015 | RVB18       | 1         | -ve                                                                                  | Normal faecal flora                                                                                                                         | no faecal eggs or coccidia oocysts seen                       |                                                                                                                                                                                                                                       |
| 1     | BIOEC2015 | RVB27       | 1         |                                                                                      |                                                                                                                                             |                                                               |                                                                                                                                                                                                                                       |
| 1     | BIOEC2015 | RVB29       | 1         | -ve                                                                                  | Normal faecal flora after 48 hours incubation.<br>No Campylobacter isolated.<br>No Salmonella spp. isolated.                                | No faecal eggs or coccidia oocysts seen                       |                                                                                                                                                                                                                                       |
| 1     | BIOEC2015 | RVB32       | 1         |                                                                                      |                                                                                                                                             |                                                               |                                                                                                                                                                                                                                       |
| 1     | BIOEC2015 | RVB32       | 2         | -ve                                                                                  | Normal faecal flora after 48 hours incubation.<br>No Campylobacter isolated.<br>No Salmonella spp. isolated.                                | No faecal egg or coccidia oocyst seen                         |                                                                                                                                                                                                                                       |
| 1     | BIOEC2015 | RVB35       | 1         | Campylobacter spp isolated.<br>No salmonella spp or Yersinia enterocolitica isolated | Campylobacter spp isolated,<br>No salmonella spp or Yersinia enterocolitica isolated                                                        | No faecal egg or coccidia oocyt seen                          | In the absence of haemorrhagic diarrhoea significance of Campylobacter spp. Tenuous. I do not ascribe any clinical significance to this observation for this patient                                                                  |
| 2     | Placebo   | RVB02       | 1         | -ve                                                                                  | Normal faecal flora only                                                                                                                    | <50 Capillaria eggs per gram seen, average size 70x30 microns |                                                                                                                                                                                                                                       |

A study investigating the efficacy of BIOEC2015 in reducing the clinical signs associated with canine inflammatory bowel disease (IBD)

FINAL

|   |         |       |   |                             |                                                                                                          |                                                                    |                                                                                                                                        |
|---|---------|-------|---|-----------------------------|----------------------------------------------------------------------------------------------------------|--------------------------------------------------------------------|----------------------------------------------------------------------------------------------------------------------------------------|
| 2 | Placebo | RVB05 | 1 | -ve                         | Normal faecal flora only                                                                                 | no faecal eggs or coccidia oocysts seen                            |                                                                                                                                        |
| 2 | Placebo | RVB09 | 1 | -ve                         | Normal faecal flora only                                                                                 | No faecal eggs or coccidia oocysts seen                            |                                                                                                                                        |
| 2 | Placebo | RVB11 | 1 | Campylobacter lari isolated | Campylobacter lari isolated, mixed faecal flora                                                          | Zinc sulphate flotation with centrifugation: Giardia cysts present |                                                                                                                                        |
| 2 | Placebo | RVB12 | 1 | -ve                         | Normal faecal flora only                                                                                 | No faecal eggs or coccidia oocysts seen                            | NCS                                                                                                                                    |
| 2 | Placebo | RVB20 | 1 |                             |                                                                                                          |                                                                    |                                                                                                                                        |
| 2 | Placebo | RVB28 | 1 | -ve                         | Normal faecal flora after 48 hours incubation. = No Campylobacter isolated. No Salmonella spp. isolated. | 2500 Capillaria eggs per gram seen, average size 65 x 30 microns   | Not responsible for diarrhoea but most likely respiratory/urinary disease. Should also be cleared up after treatment with fenbendazole |
| 2 | Placebo | RVB30 | 1 | -ve                         | Normal faecal flora isolated = No Salmonella spp, Campylobacter spp or Yersinia enterocolitica isolated  | No faecal egg or coccidia oocyst seen                              |                                                                                                                                        |
| 2 | Placebo | RVB31 | 1 | -ve                         | Normal faecal flora isolated = No Salmonella spp, Campylobacter spp or Yersinia enterocolitica isolated  | No faecal egg or coccidia oocyst seen                              |                                                                                                                                        |
| 2 | Placebo | RVB34 | 1 | -ve                         | Normal faecal flora isolated. No campylobacter spp, Yersinis enterocolitica or Salmonella spp isolated   | No faecal egg or coccidia oocyst seen                              |                                                                                                                                        |

NCS = not clinically significant.

A faecal sample not collected at Visit 1 for cases RVB13, 20, 27 and 32. A faecal sample for RVB32 was submitted at visit 2 instead.

TABLE A18. IBD Physical exam.

| Group | Treatment | Patient No. | Visit No. | Abdominal Pain/Discomfort | Pain On Palpation | Pruritis | Ascites and Peripheral Edema |
|-------|-----------|-------------|-----------|---------------------------|-------------------|----------|------------------------------|
| 1     | BIOEC2015 | RVB01       | 1         | None                      | No                | None     | None                         |
| 1     | BIOEC2015 | RVB01       | 2         | Hardly ever               | No                | None     | None                         |
| 1     | BIOEC2015 | RVB01       | 3         | None                      | No                | None     | None                         |
| 1     | BIOEC2015 | RVB01       | 7         | None                      |                   | None     | None                         |
| 1     | BIOEC2015 | RVB07       | 1         | Hardly ever               | No                | None     | None                         |
| 1     | BIOEC2015 | RVB07       | 2         | Occasionally              | No                | None     | None                         |
| 1     | BIOEC2015 | RVB08       | 1         | None                      | No                | None     | None                         |
| 1     | BIOEC2015 | RVB08       | 2         | Occasionally              | No                | None     | None                         |
| 1     | BIOEC2015 | RVB08       | 7         | None                      | No                | None     | None                         |
| 1     | BIOEC2015 | RVB08       | 3         | None                      | No                | None     | None                         |
| 1     | BIOEC2015 | RVB13       | 1         | None                      | No                | None     | None                         |
| 1     | BIOEC2015 | RVB13       | 3         | None                      | No                | None     | None                         |
| 1     | BIOEC2015 | RVB13       | 7         | None                      | No                | None     | None                         |
| 1     | BIOEC2015 | RVB13       | 2         | None                      | No                | None     | None                         |
| 1     | BIOEC2015 | RVB16       | 1         | Occasionally              | No                | None     | None                         |

A study investigating the efficacy of BIOEC2015 in reducing the clinical signs associated with canine inflammatory bowel disease (IBD)

FINAL

|   |           |       |   |              |    |                                                   |      |
|---|-----------|-------|---|--------------|----|---------------------------------------------------|------|
| 1 | BIOEC2015 | RVB16 | 2 | Occasionally | No | Occasional episodes of itching                    | None |
| 1 | BIOEC2015 | RVB16 | 3 | Occasionally | No | None                                              | None |
| 1 | BIOEC2015 | RVB16 | 7 | None         | No | None                                              | None |
| 1 | BIOEC2015 | RVB18 | 1 | Occasionally | No | None                                              | None |
| 1 | BIOEC2015 | RVB18 | 2 | Hardly ever  | No | None                                              | None |
| 1 | BIOEC2015 | RVB18 | 3 | None         | No | None                                              | None |
| 1 | BIOEC2015 | RVB18 | 7 | None         | No | None                                              | None |
| 1 | BIOEC2015 | RVB27 | 1 | None         | No | None                                              | None |
| 1 | BIOEC2015 | RVB29 | 1 | None         | No | None                                              | None |
| 1 | BIOEC2015 | RVB29 | 2 | None         | No | None                                              | None |
| 1 | BIOEC2015 | RVB29 | 3 | Hardly ever  | No | None                                              | None |
| 1 | BIOEC2015 | RVB29 | 7 | Occasionally | No | Regular episodes of itching but not when sleeping | None |
| 1 | BIOEC2015 | RVB32 | 1 | None         | No | None                                              | None |
| 1 | BIOEC2015 | RVB32 | 2 | None         | No | None                                              | None |
| 1 | BIOEC2015 | RVB32 | 3 | None         | No | None                                              | None |
| 1 | BIOEC2015 | RVB32 | 7 | None         | No | None                                              | None |
| 1 | BIOEC2015 | RVB35 | 1 | Occasionally | No | None                                              | None |
| 1 | BIOEC2015 | RVB35 | 2 | None         | No | None                                              | None |

A study investigating the efficacy of BIOEC2015 in reducing the clinical signs associated with canine inflammatory bowel disease (IBD)

FINAL

|   |           |       |   |              |    |                                |      |
|---|-----------|-------|---|--------------|----|--------------------------------|------|
| 1 | BIOEC2015 | RVB35 | 3 | None         | No | None                           | None |
| 1 | BIOEC2015 | RVB35 | 7 | None         | No | None                           | None |
| 2 | Placebo   | RVB02 | 1 | Hardly ever  | No | None                           | None |
| 2 | Placebo   | RVB02 | 2 | None         | No | None                           | None |
| 2 | Placebo   | RVB02 | 3 | Hardly ever  | No | None                           | None |
| 2 | Placebo   | RVB02 | 7 | None         | No | None                           | None |
| 2 | Placebo   | RVB05 | 1 | None         | No | None                           | None |
| 2 | Placebo   | RVB09 | 1 | Hardly ever  | No | None                           | None |
| 2 | Placebo   | RVB09 | 2 | None         | No | None                           | None |
| 2 | Placebo   | RVB09 | 3 | None         | No | None                           | None |
| 2 | Placebo   | RVB11 | 1 | None         | No | None                           | None |
| 2 | Placebo   | RVB11 | 2 | None         | No | None                           | None |
| 2 | Placebo   | RVB11 | 3 | None         | No | None                           | None |
| 2 | Placebo   | RVB11 | 7 | None         | No | None                           | None |
| 2 | Placebo   | RVB12 | 1 | Occasionally | No | None                           | None |
| 2 | Placebo   | RVB12 | 2 | None         | No | None                           | None |
| 2 | Placebo   | RVB12 | 3 | Occasionally | No | None                           | None |
| 2 | Placebo   | RVB20 | 1 | None         | No | None                           | None |
| 2 | Placebo   | RVB20 | 2 | None         | No | None                           | None |
| 2 | Placebo   | RVB20 | 3 | Hardly ever  | No | None                           | None |
| 2 | Placebo   | RVB20 | 7 | None         | No | None                           | None |
| 2 | Placebo   | RVB28 | 1 | None         | No | None                           | None |
| 2 | Placebo   | RVB28 | 2 | Every day    | No | None                           | None |
| 2 | Placebo   | RVB30 | 1 | Occasionally | No | None                           | None |
| 2 | Placebo   | RVB30 | 2 | None         | No | None                           | None |
| 2 | Placebo   | RVB31 | 1 | Occasionally | No | Occasional episodes of itching | None |
| 2 | Placebo   | RVB31 | 2 | None         | No | Occasional episodes of itching | None |
| 2 | Placebo   | RVB31 | 3 | None         | No | Occasional episodes of itching | None |
| 2 | Placebo   | RVB31 | 7 | Other        | No | None                           | None |

A study investigating the efficacy of BIOEC2015 in reducing the clinical signs associated with canine inflammatory bowel disease (IBD)

FINAL

---

|   |         |       |   |      |    |      |      |
|---|---------|-------|---|------|----|------|------|
| 2 | Placebo | RVB34 | 1 | None | No | None | None |
| 2 | Placebo | RVB34 | 2 | None | No | None | None |
| 2 | Placebo | RVB34 | 3 | None | No | None | None |
| 2 | Placebo | RVB34 | 7 | None | No | None | None |

TABLE A19. Drinking.

| Group | Treatment | Patient No. | Visit 1   | Visit 2   | Visit 3   | Visit 7 | Withdrawal |
|-------|-----------|-------------|-----------|-----------|-----------|---------|------------|
| 1     | BIOEC2015 | RVB01       | Normal    | Normal    | Normal    | Normal  |            |
| 1     | BIOEC2015 | RVB07       | Normal    | Increased |           |         | Increased  |
| 1     | BIOEC2015 | RVB08       | Normal    | Increased | Normal    | Normal  |            |
| 1     | BIOEC2015 | RVB13       | Normal    | Normal    | Normal    | Normal  |            |
| 1     | BIOEC2015 | RVB16       | Normal    | Normal    | Normal    | Normal  |            |
| 1     | BIOEC2015 | RVB18       | Decreased | Normal    | Normal    | Normal  |            |
| 1     | BIOEC2015 | RVB27       | Normal    |           |           |         |            |
| 1     | BIOEC2015 | RVB29       | Normal    | Normal    | Normal    | Normal  |            |
| 1     | BIOEC2015 | RVB32       | Normal    | Decreased | Normal    | Normal  |            |
| 1     | BIOEC2015 | RVB35       | Normal    | Normal    | Normal    | Normal  |            |
| 2     | Placebo   | RVB02       | Normal    | Normal    | Normal    | Normal  |            |
| 2     | Placebo   | RVB05       | Normal    |           |           |         |            |
| 2     | Placebo   | RVB09       | Normal    | Normal    | Increased |         | Increased  |
| 2     | Placebo   | RVB11       | Normal    | Normal    | Normal    | Normal  |            |
| 2     | Placebo   | RVB12       | Normal    | Normal    | Normal    |         | Normal     |
| 2     | Placebo   | RVB20       | Normal    | Normal    | Normal    | Normal  |            |
| 2     | Placebo   | RVB28       | Increased | Normal    |           |         |            |
| 2     | Placebo   | RVB30       | Normal    | Increased |           |         |            |
| 2     | Placebo   | RVB31       | Normal    | Increased | Normal    | Normal  |            |
| 2     | Placebo   | RVB34       | Increased | Normal    | Normal    | Normal  |            |



TABLE A20. Diet.

| Group | Treatment | Patient No. | Pre Visit 1                                                                                                                  |        | Visit 1 - 2         | Visit 2 - 3   | Visit 3 - 4   | Visit 4 - 5                                                         |        | Visit 5 - 6                                 |        | Visit 6 - 7                         |                          |
|-------|-----------|-------------|------------------------------------------------------------------------------------------------------------------------------|--------|---------------------|---------------|---------------|---------------------------------------------------------------------|--------|---------------------------------------------|--------|-------------------------------------|--------------------------|
|       |           |             | Diet History                                                                                                                 | Treats | Purina HA/day       | Purina HA/day | Purina HA/day | Feed/day                                                            | Treats | Feed/day                                    | Treats | Feed/day                            | Treats                   |
| 1     | BIOEC2015 | RVB01       | Purina HA. Fish and potatoes diet. Hills z/d (1tin + 100g dry/day)                                                           |        | 220g                | 180g          | 200g          | 160g Hills z/d dry                                                  |        | 135g Purina HA + 36g z/d dry                |        | 190g Purina HA                      | Advance Hydrolysed treat |
| 1     | BIOEC2015 | RVB07       | Royal Canin GI Low fat. id canine low fat. Chappie (fish) and butchers (tripe & chicken and tripe & beef) - two meals a day. |        | As much as he wants |               |               |                                                                     |        |                                             |        |                                     |                          |
| 1     | BIOEC2015 | RVB08       | Royal Canin GI, boiled chicken and rice 125g BID                                                                             |        | 315g                | 380g          | 310g          | 128g Purina HA and 26g Arden Grange Sensitive White fish and potato |        | 48g Purina HA and 98g Arden Grange          |        | 130g Purina HA and 40g Arden Grange |                          |
| 1     | BIOEC2015 | RVB13       | Chappie fed long term. Tried Hills z/d but had severe diarrhoea so changed back to Chappie. 824g Chappie and 100g            |        | 440g                | 440g          | 400g          | Chappie /Purina mix from V4 but clinical signs worsened             |        | 440g Purina HA + 1/2 handful of Chappie dry |        | 440g Purina HA and WAGG             |                          |

A study investigating the efficacy of BIOEC2015 in reducing the clinical signs associated with canine inflammatory bowel disease (IBD)

FINAL

|   |            |       |                                                                                                                        |                                                   |      |      |      |                                        |                   |                                                                     |                                          |                                        |                                          |
|---|------------|-------|------------------------------------------------------------------------------------------------------------------------|---------------------------------------------------|------|------|------|----------------------------------------|-------------------|---------------------------------------------------------------------|------------------------------------------|----------------------------------------|------------------------------------------|
|   |            |       | WAGG meaty chunks per day.                                                                                             |                                                   |      |      |      | so exclusively fed 440g Purina HA      |                   |                                                                     |                                          |                                        |                                          |
| 1 | BIOEC2 015 | RVB16 | Hills w/d, chicken, low fat Royal Canin                                                                                |                                                   | 120g | 170g | 170g | 180g Hills w/d dry                     |                   | 180g Hills w/d dry                                                  |                                          | 180g Hills w/d dry                     | Hills w/d dry                            |
| 1 | BIOEC2 015 | RVB18 | Started RCW Hypoallergenic diet (150g) on 15Jul16, previous to this was on James Well Beloved per day.                 |                                                   | 155g | 155g | 155g | 155g Purina HA                         |                   | 155g Purina HA                                                      |                                          | 155g Purina HA                         | Wainwrights hypoallergenic treats x 2    |
| 1 | BIOEC2 015 | RVB27 | Butchers 400g and sausages                                                                                             | Sausages                                          |      |      |      |                                        |                   |                                                                     |                                          |                                        |                                          |
| 1 | BIOEC2 015 | RVB29 | Purina HA (375g) from Feb 17. Dog chews, vegetables                                                                    | Dog chews, carrots, vegetables                    | 300g | 325g | 325g | 300-350g Purina HA                     |                   | 230g Purina HA and 120g Barking Heads gentle digestion with chicken |                                          | 280-300g Purina HA                     |                                          |
| 1 | BIOEC2 015 | RVB32 | Chappie at rehoming centre and a few weeks after rehoming. 150g dry plus one tin Milly's Wolfeheart per day since then | Pedigree dentistix SID plus pedigree tasty treats | 350g | 350g | 350g | 150g dry plus 1 tin Millies Wolfeheart | Bonio x 2 per day | 150g dry plus 1 tin Millies Wolfeheart                              | Bonio x 2 per day, Dentistix x 1 per day | 150g dry plus 1 tin Millies Wolfeheart | Bonio x 2 per day, Dentistix x 1 per day |

|   |           |       |                                                                                                                        |                           |      |                                             |      |                                                   |           |                            |           |                                       |                                    |
|---|-----------|-------|------------------------------------------------------------------------------------------------------------------------|---------------------------|------|---------------------------------------------|------|---------------------------------------------------|-----------|----------------------------|-----------|---------------------------------------|------------------------------------|
| 1 | BIOEC2015 | RVB35 | Butchers Original dry (250g). Chicken and rice                                                                         | Dentastix, dog chews-beef | 326g | 326g                                        | 326g | 250g Butchers original dry                        | Dentastix | 250g Butchers original dry | Dentastix | 326g Bakers dry food                  | Dentastix, Meaty chews             |
| 2 | Placebo   | RVB02 | James Well beloved Lamb and rice. Hills i/d duck and rice. Chicken. White fish. 450g /day of Lily's Kitchen Venison    | Tit-bits                  | 160g | 160g                                        | 160g | 160g Wainwrights Rabbit and Vegetable + Purina HA |           | 160g Fish complete diet    |           | 160g Purina HA and 2 sardines per day | Rawhide chew and Liver and Venison |
| 2 | Placebo   | RVB05 | James Well beloved wet and dry food. Hills i/d chicken and rice.                                                       | chicken                   |      |                                             |      |                                                   |           |                            |           |                                       |                                    |
| 2 | Placebo   | RVB09 | Cooked chicken with rice/potato and cooked lamb. This is the most recent but was on a GI diet for a short while.       |                           | 400g | 300g - not wanting to eat as much as before |      |                                                   |           |                            |           |                                       |                                    |
| 2 | Placebo   | RVB11 | Previously tried i/d diet, starting on 01 Dec 15 for ~ 3 weeks. 500g/day of raw food mixed with kibble (Origin Tundra) |                           | 600g | 500-600g                                    | 700g | 340g Orijen Tundra                                |           | 700g Purina HA             |           | 700g Purina HA                        |                                    |

|   |         |       |                                                                                                                                                                                         |                                  |            |        |          |                  |  |                                  |  |                                  |                             |
|---|---------|-------|-----------------------------------------------------------------------------------------------------------------------------------------------------------------------------------------|----------------------------------|------------|--------|----------|------------------|--|----------------------------------|--|----------------------------------|-----------------------------|
| 2 | Placebo | RVB12 | Feeding chicken and rice or WAGG sensitive. Was on James Well beloved before that.                                                                                                      |                                  | 4 cups     | 4 cups |          |                  |  |                                  |  |                                  |                             |
| 2 | Placebo | RVB20 | Chicken and rice, Hills z/d. Natures menu raw food diet (300g meat, 100g veg, 100g biscuit)                                                                                             | Bonio. Although stopped recently | 300g       | 300g   | 300g     | 310g Chappie Dry |  | 310g Chappie dry, beef flavoured |  | 310g Chappie dry beef wholegrain | Chappie dry beef wholegrain |
| 2 | Placebo | RVB28 | Puppy dry food, Purina HA, Anallergenic (Royal Canin), chicken/lamb/brown rice                                                                                                          |                                  | 6 handfuls |        |          |                  |  |                                  |  |                                  |                             |
| 2 | Placebo | RVB30 | Raw food diet initially then at 6 months age changed on to Caninde Duck dry biscuits and cooked chicken. One week ago changed to Purina HA (360g) and Hills z/d (6 spoonful's) per day. |                                  | 240g       |        |          |                  |  |                                  |  |                                  |                             |
| 2 | Placebo | RVB31 | Chappie, i/d (Hills) with chicken, Burns sensitivity, Hills low fat i/d (1tin/day).                                                                                                     |                                  | 200g       | 210g   | 190-200g | 200g Purina HA   |  | 200g Purina HA                   |  | 190-200g Purina HA               |                             |

A study investigating the efficacy of BIOEC2015 in reducing the clinical signs associated with canine inflammatory bowel disease (IBD)

FINAL

|   |         |       |                                                                                          |               |      |      |      |                                    |                                   |                                    |                                                                                 |                                                 |                                  |
|---|---------|-------|------------------------------------------------------------------------------------------|---------------|------|------|------|------------------------------------|-----------------------------------|------------------------------------|---------------------------------------------------------------------------------|-------------------------------------------------|----------------------------------|
| 2 | Placebo | RVB34 | Royal Canin Veterinary Gastro intestinal (350g/day) and fresh chicken. Hills i/d tinned. | Fresh chicken | 310g | 310g | 310g | 310g Hills sensitive stomach adult | Training treats - chicken flavour | 310g Hills sensitive stomach adult | Training treats (chicken flavour) and small amounts of roast chicken on Sundays | 320g Hills science plan sensitive stomach adult | Chicken and chicken based treats |
|---|---------|-------|------------------------------------------------------------------------------------------|---------------|------|------|------|------------------------------------|-----------------------------------|------------------------------------|---------------------------------------------------------------------------------|-------------------------------------------------|----------------------------------|

TABLE A21. General physical exam.

| Group | Treatment  | Patient No. | Visit No. | Temperature (°C) | Respiratory System | Cardiac system | Musculo-Skeletal system               | Comments                                       | Current Weight (kg) | * Baseline Weight (kg) | Baseline Weight Date | Estimated Weight Loss |
|-------|------------|-------------|-----------|------------------|--------------------|----------------|---------------------------------------|------------------------------------------------|---------------------|------------------------|----------------------|-----------------------|
| 1     | BIOE C2015 | RVBO 1      | 1         | 38.5             | Normal             | Normal         | Normal                                |                                                | 10.10               | 10.60                  | 15-Sep-15            | Mild (<5%)            |
| 1     | BIOE C2015 | RVBO 1      | 2         | 38.5             | Normal             | Normal         | Normal                                |                                                | 10.60               | 10.10                  | 13-Oct-15            | None                  |
| 1     | BIOE C2015 | RVBO 1      | 3         | 38.3             | Normal             | Normal         | Normal                                |                                                | 10.35               | 10.10                  | 13-Oct-15            | None                  |
| 1     | BIOE C2015 | RVBO 1      | 7         | 38.2             | Normal             | Normal         | Normal                                |                                                | 10.40               | 10.10                  | 13-Oct-15            | None                  |
| 1     | BIOE C2015 | RVBO 7      | 1         | 38.4             | Normal             | Normal         | Abnormal - clinically significant     | Muscle mass loss                               | 18.70               | 19.20                  | 30-Nov-15            | Mild (<5%)            |
| 1     | BIOE C2015 | RVBO 7      | 2         | 38.3             | Normal             | Normal         | Abnormal - not clinically significant | mild muscle atrophy: HL and temporal + epaxial | 18.45               | 18.70                  | 30-Nov-15            | Mild (<5%)            |
| 1     | BIOE C2015 | RVBO 8      | 1         | 37.4             | Normal             | Normal         | Normal                                |                                                | 17.40               | 19.00                  | 25-Sep-15            | Moderate (5-10%)      |
| 1     | BIOE C2015 | RVBO 8      | 2         | 37.9             | Normal             | Normal         | Normal                                |                                                | 18.15               | 17.40                  | 07-Dec-15            | None                  |
| 1     | BIOE C2015 | RVBO 8      | 7         | 38.8             | Normal             | Normal         | Normal                                | Within Normal Limits                           | 18.45               | 17.40                  | 07-Dec-15            | None                  |

A study investigating the efficacy of BIOEC2015 in reducing the clinical signs associated with canine inflammatory bowel disease (IBD)

FINAL

|   |             |        |   |      |        |                                       |        |                                   |       |       |           |                  |
|---|-------------|--------|---|------|--------|---------------------------------------|--------|-----------------------------------|-------|-------|-----------|------------------|
| 1 | BIOE C201 5 | RVB0 8 | 3 | 38.0 | Normal | Normal                                | Normal |                                   | 18.25 | 17.40 | 07-Dec-15 | None             |
| 1 | BIOE C201 5 | RVB1 3 | 1 | 38.2 | Normal | Normal                                | Normal |                                   | 36.50 | 38.10 | 01-Jun-16 | Mild (<5%)       |
| 1 | BIOE C201 5 | RVB1 3 | 3 | 38.2 | Normal | Normal                                | Normal |                                   | 38.95 | 36.50 | 08-Jun-16 | None             |
| 1 | BIOE C201 5 | RVB1 3 | 7 | 38.1 | Normal | Normal                                | Normal |                                   | 39.10 | 36.50 | 08-Jun-18 | None             |
| 1 | BIOE C201 5 | RVB1 3 | 2 | 38.9 | Normal | Normal                                | Normal |                                   | 37.60 | 36.50 | 08-Jun-16 | None             |
| 1 | BIOE C201 5 | RVB1 6 | 1 | 38.0 | Normal | Abnormal - not clinically significant | Normal | II/VI left sided systolic murmur  | 9.60  | 9.40  | 18-Jul-16 | None             |
| 1 | BIOE C201 5 | RVB1 6 | 2 | 39.1 | Normal | Abnormal - not clinically significant | Normal | Grade II/VI L apical murmur       | 8.90  | 9.60  | 20-Jul-16 | Moderate (5-10%) |
| 1 | BIOE C201 5 | RVB1 6 | 3 | 39.5 | Normal | Normal                                | Normal |                                   | 9.50  | 9.60  | 20-Jul-16 | Mild (<5%)       |
| 1 | BIOE C201 5 | RVB1 6 | 7 | 38.7 | Normal | Abnormal - not clinically significant | Normal | III/VI left sided systolic murmur | 9.85  | 9.60  | 20-Jul-16 | None             |
| 1 | BIOE C201 5 | RVB1 8 | 1 | 38.6 | Normal | Normal                                | Normal |                                   | 7.85  | 7.50  | 09-Apr-15 | None             |
| 1 | BIOE C201 5 | RVB1 8 | 2 | 39.0 | Normal | Normal                                | Normal |                                   | 8.30  | 7.85  | 02-Aug-16 | None             |

A study investigating the efficacy of BIOEC2015 in reducing the clinical signs associated with canine inflammatory bowel disease (IBD)

FINAL

|   |            |       |   |      |        |                                       |        |                                                                                                     |       |       |           |                  |
|---|------------|-------|---|------|--------|---------------------------------------|--------|-----------------------------------------------------------------------------------------------------|-------|-------|-----------|------------------|
| 1 | BIOE C2015 | RVB18 | 3 | 38.2 | Normal | Abnormal - not clinically significant | Normal | Grade I heart murmur                                                                                | 8.60  | 7.85  | 02-Aug-16 | None             |
| 1 | BIOE C2015 | RVB18 | 7 | 39.1 | Normal | Normal                                | Normal |                                                                                                     | 8.40  | 7.85  | 02-Aug-16 | None             |
| 1 | BIOE C2015 | RVB27 | 1 | 38.5 | Normal | Normal                                | Normal |                                                                                                     | 19.90 | 20.70 | 21-Dec-16 | Mild (<5%)       |
| 1 | BIOE C2015 | RVB29 | 1 | 38.3 | Normal | Normal                                | Normal |                                                                                                     | 25.85 | 26.60 | 09-Mar-17 | Mild (<5%)       |
| 1 | BIOE C2015 | RVB29 | 2 | 38.9 | Normal | Normal                                | Normal |                                                                                                     | 25.65 | 25.85 | 03-Apr-17 | Mild (<5%)       |
| 1 | BIOE C2015 | RVB29 | 3 | 38.5 | Normal | Normal                                | Normal |                                                                                                     | 26.05 | 25.85 | 03-Apr-17 | None             |
| 1 | BIOE C2015 | RVB29 | 7 | 39.0 | Normal | Normal                                | Normal |                                                                                                     | 26.50 | 25.85 | 03-Apr-17 | None             |
| 1 | BIOE C2015 | RVB32 | 1 | 38.6 | Normal | Normal                                | Normal |                                                                                                     | 22.60 | 24.60 | 07-May-17 | Moderate (5-10%) |
| 1 | BIOE C2015 | RVB32 | 2 | 38.4 | Normal | Abnormal - not clinically significant | Normal | Intermittent early systolic grade I/II left systolic heart murmur, suspect physiologic heart murmur | 24.00 | 22.60 | 16-May-17 | None             |

A study investigating the efficacy of BIOEC2015 in reducing the clinical signs associated with canine inflammatory bowel disease (IBD)

FINAL



|   |             |        |   |      |        |                                       |        |                                        |       |       |           |                  |
|---|-------------|--------|---|------|--------|---------------------------------------|--------|----------------------------------------|-------|-------|-----------|------------------|
| 1 | BIOE C201 5 | RVB3 2 | 3 | 38.5 | Normal | Abnormal - not clinically significant | Normal | Grade I/VI left apical systolic murmur | 24.30 | 22.60 | 16-May-17 | None             |
| 1 | BIOE C201 5 | RVB3 2 | 7 | 38.7 | Normal | Abnormal - not clinically significant | Normal | G I/VI apical systolic murmur          | 22.95 | 22.60 | 16-May-17 | None             |
| 1 | BIOE C201 5 | RVB3 5 | 1 | 38.4 | Normal | Normal                                | Normal |                                        | 18.80 | 18.60 | 27-Nov-17 | None             |
| 1 | BIOE C201 5 | RVB3 5 | 2 | 38.7 | Normal | Normal                                | Normal |                                        | 17.05 | 18.80 | 04-Dec-17 | Moderate (5-10%) |
| 1 | BIOE C201 5 | RVB3 5 | 3 | 38.4 | Normal | Normal                                | Normal |                                        | 18.40 | 18.80 | 04-Dec-17 | Mild (<5%)       |
| 1 | BIOE C201 5 | RVB3 5 | 7 | 37.7 | Normal | Normal                                | Normal |                                        | 20.60 | 18.80 | 04-Dec-17 | None             |
| 2 | Place bo    | RVB0 2 | 1 | 38.2 | Normal | Normal                                | Normal |                                        | 8.20  | 8.20  | 14-Oct-15 | None             |
| 2 | Place bo    | RVB0 2 | 2 | 37.9 | Normal | Normal                                | Normal |                                        | 7.95  | 8.20  | 14-Oct-15 | Mild (<5%)       |
| 2 | Place bo    | RVB0 2 | 3 | 38.3 | Normal | Normal                                | Normal |                                        | 8.05  | 8.20  | 14-Oct-15 | Mild (<5%)       |
| 2 | Place bo    | RVB0 2 | 7 | 38.1 | Normal | Normal                                | Normal |                                        | 8.40  | 8.20  | 14-Oct-15 | None             |
| 2 | Place bo    | RVB0 5 | 1 | 38.8 | Normal | Normal                                | Normal |                                        | 20.30 | 21.80 | 21-Oct-15 | Moderate (5-10%) |
| 2 | Place bo    | RVB0 9 | 1 | 38.6 | Normal | Normal                                | Normal |                                        | 30.40 | 30.05 | 12-Jan-16 | None             |
| 2 | Place bo    | RVB0 9 | 2 | 38.6 | Normal | Normal                                | Normal |                                        | 31.50 | 30.40 | 26-Jan-16 | None             |
| 2 | Place bo    | RVB0 9 | 3 | 38.9 | Normal | Normal                                | Normal |                                        | 27.30 | 30.40 | 26-Jan-16 | Severe (>10%)    |

A study investigating the efficacy of BIOEC2015 in reducing the clinical signs associated with canine inflammatory bowel disease (IBD)

FINAL

|   |         |           |   |           |                                       |        |        |                                       |       |       |           |                  |
|---|---------|-----------|---|-----------|---------------------------------------|--------|--------|---------------------------------------|-------|-------|-----------|------------------|
| 2 | Placebo | RVB1<br>1 | 1 | 38.3      | Normal                                | Normal | Normal | underweight                           | 29.00 | 29.35 | 30-Dec-15 | Mild (<5%)       |
| 2 | Placebo | RVB1<br>1 | 2 | 38.2      | Normal                                | Normal | Normal |                                       | 29.25 | 29.00 | 01-Feb-16 | None             |
| 2 | Placebo | RVB1<br>1 | 3 | 38.0      | Normal                                | Normal | Normal |                                       | 30.00 | 29.00 | 01-Feb-16 | None             |
| 2 | Placebo | RVB1<br>1 | 7 | Not taken | Normal                                | Normal | Normal |                                       | 30.35 | 29.00 | 01-Feb-16 | None             |
| 2 | Placebo | RVB1<br>2 | 1 | 38.4      | Normal                                | Normal | Normal |                                       | 34.00 | 33.85 | 07-Mar-16 | None             |
| 2 | Placebo | RVB1<br>2 | 2 | 39.2      | Normal                                | Normal | Normal |                                       | 35.00 | 34.00 | 09-Mar-16 | None             |
| 2 | Placebo | RVB1<br>2 | 3 | 39.2      | Normal                                | Normal | Normal |                                       | 33.75 | 34.00 | 09-Mar-16 | Mild (<5%)       |
| 2 | Placebo | RVB2<br>0 | 1 | 38.8      | Normal                                | Normal | Normal |                                       | 18.15 | 18.60 | 11-Aug-16 | Mild (<5%)       |
| 2 | Placebo | RVB2<br>0 | 2 | 38.2      | Normal                                | Normal | Normal |                                       | 19.50 | 18.15 | 23-Aug-16 | None             |
| 2 | Placebo | RVB2<br>0 | 3 | 38.3      | Normal                                | Normal | Normal |                                       | 20.80 | 18.15 | 23-Aug-16 | None             |
| 2 | Placebo | RVB2<br>0 | 7 | 38.6      | Normal                                | Normal | Normal |                                       | 20.20 | 18.15 | 23-Aug-16 | None             |
| 2 | Placebo | RVB2<br>8 | 1 | 38.8      | Normal                                | Normal | Normal |                                       | 9.00  | 8.95  | 18-Nov-16 | None             |
| 2 | Placebo | RVB2<br>8 | 2 | 38.1      | Normal                                | Normal | Normal |                                       | 8.70  | 9.00  | 30-Mar-17 | Mild (<5%)       |
| 2 | Placebo | RVB3<br>0 | 1 | 37.8      | Abnormal - not clinically significant | Normal | Normal |                                       | 13.00 | 13.70 | 27-Mar-17 | Moderate (5-10%) |
| 2 | Placebo | RVB3<br>0 | 2 | 38.3      | Abnormal - not clinically significant | Normal | Normal | BOAS, not causing problems at present | 13.25 | 13.00 | 10-Apr-17 | None             |

|   |          |        |   |      |        |                                       |        |                                          |       |       |           |            |
|---|----------|--------|---|------|--------|---------------------------------------|--------|------------------------------------------|-------|-------|-----------|------------|
| 2 | Place bo | RVB3 1 | 1 | 37.8 | Normal | Abnormal - not clinically significant | Normal | Grade II/VI left apical systolic murmur  | 10.40 | 10.30 | 07-Apr-17 | None       |
| 2 | Place bo | RVB3 1 | 2 | 38.3 | Normal | Normal                                | Normal |                                          | 10.75 | 10.40 | 18-Apr-17 | None       |
| 2 | Place bo | RVB3 1 | 3 | 38.6 | Normal | Normal                                | Normal |                                          | 12.30 | 10.40 | 18-Apr-17 | None       |
| 2 | Place bo | RVB3 1 | 7 | 38.4 | Normal | Abnormal - not clinically significant | Normal | Grade I/VI left sided heart murmur noted | 12.15 | 10.40 | 18-Apr-18 | None       |
| 2 | Place bo | RVB3 4 | 1 | 38.4 | Normal | Normal                                | Normal |                                          | 24.25 | 24.60 | 11-Sep-17 | Mild (<5%) |
| 2 | Place bo | RVB3 4 | 2 | 37.6 | Normal | Normal                                | Normal |                                          | 24.10 | 24.25 | 13-Sep-17 | Mild (<5%) |
| 2 | Place bo | RVB3 4 | 3 | 37.7 | Normal | Normal                                | Normal |                                          | 24.75 | 24.25 | 13-Sep-17 | None       |
| 2 | Place bo | RVB3 4 | 7 | 38.7 | Normal | Normal                                | Normal |                                          | 26.15 | 24.25 | 13-Sep-17 | None       |

\* Baseline weight at Visit 1 is last documented weight by referring veterinary surgeon, at subsequent visits the weight from Visit 1 was used the baseline weight

TABLE A22. CCECAI Scores.

| Group | Treatment   | Patient No. | Visit No. | Attitude /Activity Score | Appetite Score           | Vomiting Score               | Stool Consistency Score                                 | Stool Frequency Score                  | Weight Loss Score    | Albumin Levels Score | Ascites and Peripheral Oedema Score | Pruritus Score  | CCECAI Total |
|-------|-------------|-------------|-----------|--------------------------|--------------------------|------------------------------|---------------------------------------------------------|----------------------------------------|----------------------|----------------------|-------------------------------------|-----------------|--------------|
| 1     | BIO EC2 015 | RVB 01      | 1         | 0 = normal               | 0 = normal               | 0 = normal                   | 1 = slightly soft faeces or faecal blood, mucus or both | 1 = slightly increased (2-3 x per day) | 0 = None             | 0 = >20g/l           | 0 = none                            | 0 = no pruritis | 2            |
| 1     | BIO EC2 015 | RVB 01      | 2         | 1 = slightly decreased   | 0 = normal               | 1 = mild (up to once a week) | 0 = normal                                              | 0 = normal                             | 0 = None             | 0 = >20g/l           | 0 = none                            | 0 = no pruritis | 2            |
| 1     | BIO EC2 015 | RVB 01      | 3         | 0 = normal               | 0 = normal               | 0 = normal                   | 1 = slightly soft faeces or faecal blood, mucus or both | 1 = slightly increased (2-3 x per day) | 1 = mild (<5%)       | 0 = >20g/l           | 0 = none                            | 0 = no pruritis | 3            |
| 1     | BIO EC2 015 | RVB 01      | 7         | 0 = normal               | 0 = normal               | 0 = normal                   | 0 = normal                                              | 1 = slightly increased (2-3 x per day) | 0 = None             | 0 = >20g/l           | 0 = none                            | 0 = no pruritis | 1            |
| 1     | BIO EC2 015 | RVB 07      | 1         | 0 = normal               | 0 = normal               | 0 = normal                   | 4 = watery diarrhoea                                    | 1 = slightly increased (2-3 x per day) | 1 = mild (<5%)       | 0 = >20g/l           | 0 = none                            | 0 = no pruritis | 6            |
| 1     | BIO EC2 015 | RVB 07      | 2         | 0 = normal               | 0 = normal               | 0 = normal                   | 4 = watery diarrhoea                                    | 0 = normal                             | 1 = mild (<5%)       | 1 = 15-19.9g/l       | 0 = none                            | 0 = no pruritis | 6            |
| 1     | BIO EC2 015 | RVB 08      | 1         | 0 = normal               | 0 = normal               | 0 = normal                   | 2 = very soft faeces                                    | 3 = severely increased (>5 x per day)  | 2 = moderate (5-10%) | 0 = >20g/l           | 0 = none                            | 0 = no pruritis | 7            |
| 1     | BIO EC2 015 | RVB 08      | 2         | 0 = normal               | 2 = moderately decreased | 0 = normal                   | 0 = normal                                              | 1 = slightly increased (2-3 x per day) | 0 = None             | 0 = >20g/l           | 0 = none                            | 0 = no pruritis | 3            |

A study investigating the efficacy of BIOEC2015 in reducing the clinical signs associated with canine inflammatory bowel disease (IBD)

FINAL

|   |                   |           |   |                                  |                           |                                            |                                                                  |                                                   |                                 |               |          |                                       |   |
|---|-------------------|-----------|---|----------------------------------|---------------------------|--------------------------------------------|------------------------------------------------------------------|---------------------------------------------------|---------------------------------|---------------|----------|---------------------------------------|---|
| 1 | BIO<br>EC2<br>015 | RVB<br>08 | 7 | 0 =<br>normal                    | 0 = normal                | 0 = normal                                 | 0 = normal                                                       | 1 = slightly<br>increased (2-3<br>x per day)      | 0 =<br>None                     | 0 =<br>>20g/l | 0 = none | 0 = no puritis                        | 1 |
| 1 | BIO<br>EC2<br>015 | RVB<br>08 | 3 | 0 =<br>normal                    | 1 = slightly<br>decreased | 0 = normal                                 | 1 = slightly soft<br>faeces or faecal<br>blood, mucus or<br>both | 1 = slightly<br>increased (2-3<br>x per day)      | 0 =<br>None                     | 0 =<br>>20g/l | 0 = none | 0 = no puritis                        | 3 |
| 1 | BIO<br>EC2<br>015 | RVB<br>13 | 1 | 0 =<br>normal                    | 0 = normal                | 3 = severe<br>(>3x per<br>week)            | 0 = normal                                                       | 0 = normal                                        | 1 =<br>mild<br>(<5%)            | 0 =<br>>20g/l | 0 = none | 0 = no puritis                        | 4 |
| 1 | BIO<br>EC2<br>015 | RVB<br>13 | 3 | 0 =<br>normal                    | 0 = normal                | 1 = mild (up<br>to once a<br>week)         | 0 = normal                                                       | 0 = normal                                        | 0 =<br>None                     | 0 =<br>>20g/l | 0 = none | 0 = no puritis                        | 1 |
| 1 | BIO<br>EC2<br>015 | RVB<br>13 | 7 | 0 =<br>normal                    | 0 = normal                | 0 = normal                                 | 0 = normal                                                       | 1 = slightly<br>increased (2-3<br>x per day)      | 0 =<br>None                     | 0 =<br>>20g/l | 0 = none | 0 = no puritis                        | 1 |
| 1 | BIO<br>EC2<br>015 | RVB<br>13 | 2 | 0 =<br>normal                    | 0 = normal                | 0 = normal                                 | 0 = normal                                                       | 0 = normal                                        | 0 =<br>None                     | 0 =<br>>20g/l | 0 = none | 0 = no puritis                        | 0 |
| 1 | BIO<br>EC2<br>015 | RVB<br>16 | 1 | 1 =<br>slightly<br>decrease<br>d | 0 = normal                | 2 =<br>moderate<br>(1-3 times<br>per week) | 1 = slightly soft<br>faeces or faecal<br>blood, mucus or<br>both | 2 =<br>moderately<br>increased (4-5<br>x per day) | 0 =<br>None                     | 0 =<br>>20g/l | 0 = none | 1 = occasional<br>episodes of itching | 7 |
| 1 | BIO<br>EC2<br>015 | RVB<br>16 | 2 | 1 =<br>slightly<br>decrease<br>d | 1 = slightly<br>decreased | 2 =<br>moderate<br>(1-3 times<br>per week) | 1 = slightly soft<br>faeces or faecal<br>blood, mucus or<br>both | 1 = slightly<br>increased (2-3<br>x per day)      | 2 =<br>modera<br>te (5-<br>10%) | 0 =<br>>20g/l | 0 = none | 1 = occasional<br>episodes of itching | 9 |
| 1 | BIO<br>EC2<br>015 | RVB<br>16 | 3 | 1 =<br>slightly<br>decrease<br>d | 1 = slightly<br>decreased | 2 =<br>moderate<br>(1-3 times<br>per week) | 1 = slightly soft<br>faeces or faecal<br>blood, mucus or<br>both | 1 = slightly<br>increased (2-3<br>x per day)      | 1 =<br>mild<br>(<5%)            | 0 =<br>>20g/l | 0 = none | 0 = no puritis                        | 7 |
| 1 | BIO<br>EC2<br>015 | RVB<br>16 | 7 | 0 =<br>normal                    | 0 = normal                | 0 = normal                                 | 0 = normal                                                       | 2 =<br>moderately<br>increased (4-5<br>x per day) | 0 =<br>None                     | 0 =<br>>20g/l | 0 = none | 0 = no puritis                        | 2 |

|   |                   |           |   |                                  |                           |                                            |                                                                  |                                              |                                 |               |          |                                                                  |   |
|---|-------------------|-----------|---|----------------------------------|---------------------------|--------------------------------------------|------------------------------------------------------------------|----------------------------------------------|---------------------------------|---------------|----------|------------------------------------------------------------------|---|
| 1 | BIO<br>EC2<br>015 | RVB<br>18 | 1 | 1 =<br>slightly<br>decrease<br>d | 1 = slightly<br>decreased | 3 = severe<br>(>3x per<br>week)            | 0 = normal                                                       | 1 = slightly<br>increased (2-3<br>x per day) | 0 =<br>None                     | 0 =<br>>20g/l | 0 = none | 0 = no puritis                                                   | 6 |
| 1 | BIO<br>EC2<br>015 | RVB<br>18 | 2 | 0 =<br>normal                    | 0 = normal                | 0 = normal                                 | 0 = normal                                                       | 0 = normal                                   | 0 =<br>None                     | 0 =<br>>20g/l | 0 = none | 0 = no puritis                                                   | 0 |
| 1 | BIO<br>EC2<br>015 | RVB<br>18 | 3 | 0 =<br>normal                    | 0 = normal                | 1 = mild (up<br>to once a<br>week)         | 0 = normal                                                       | 0 = normal                                   | 0 =<br>None                     | 0 =<br>>20g/l | 0 = none | 0 = no puritis                                                   | 1 |
| 1 | BIO<br>EC2<br>015 | RVB<br>18 | 7 | 0 =<br>normal                    | 0 = normal                | 0 = normal                                 | 0 = normal                                                       | 1 = slightly<br>increased (2-3<br>x per day) | 0 =<br>None                     | 0 =<br>>20g/l | 0 = none | 0 = no puritis                                                   | 1 |
| 1 | BIO<br>EC2<br>015 | RVB<br>27 | 1 | 0 =<br>normal                    | 0 = normal                | 2 =<br>moderate<br>(1-3 times<br>per week) | 1 = slightly soft<br>faeces or faecal<br>blood, mucus or<br>both | 1 = slightly<br>increased (2-3<br>x per day) | 1 =<br>mild<br>(<5%)            | 0 =<br>>20g/l | 0 = none | 0 = no puritis                                                   | 5 |
| 1 | BIO<br>EC2<br>015 | RVB<br>29 | 1 | 0 =<br>normal                    | 0 = normal                | 2 =<br>moderate<br>(1-3 times<br>per week) | 0 = normal                                                       | 0 = normal                                   | 1 =<br>mild<br>(<5%)            | 0 =<br>>20g/l | 0 = none | 0 = no puritis                                                   | 3 |
| 1 | BIO<br>EC2<br>015 | RVB<br>29 | 2 | 0 =<br>normal                    | 1 = slightly<br>decreased | 0 = normal                                 | 0 = normal                                                       | 0 = normal                                   | 1 =<br>mild<br>(<5%)            | 0 =<br>>20g/l | 0 = none | 0 = no puritis                                                   | 2 |
| 1 | BIO<br>EC2<br>015 | RVB<br>29 | 3 | 0 =<br>normal                    | 0 = normal                | 0 = normal                                 | 0 = normal                                                       | 0 = normal                                   | 0 =<br>None                     | 0 =<br>>20g/l | 0 = none | 0 = no puritis                                                   | 0 |
| 1 | BIO<br>EC2<br>015 | RVB<br>29 | 7 | 0 =<br>normal                    | 1 = slightly<br>decreased | 0 = normal                                 | 0 = normal                                                       | 0 = normal                                   | 0 =<br>None                     | 0 =<br>>20g/l | 0 = none | 2 = regular<br>episodes of itching<br>, but stops when<br>asleep | 3 |
| 1 | BIO<br>EC2<br>015 | RVB<br>32 | 1 | 0 =<br>normal                    | 0 = normal                | 1 = mild (up<br>to once a<br>week)         | 1 = slightly soft<br>faeces or faecal<br>blood, mucus or<br>both | 1 = slightly<br>increased (2-3<br>x per day) | 2 =<br>modera<br>te (5-<br>10%) | 0 =<br>>20g/l | 0 = none | 0 = no puritis                                                   | 5 |

|   |                   |           |   |                                  |                           |                                    |                                                                  |                                              |                                 |               |          |                |   |
|---|-------------------|-----------|---|----------------------------------|---------------------------|------------------------------------|------------------------------------------------------------------|----------------------------------------------|---------------------------------|---------------|----------|----------------|---|
| 1 | BIO<br>EC2<br>015 | RVB<br>32 | 2 | 0 =<br>normal                    | 0 = normal                | 0 = normal                         | 0 = normal                                                       | 1 = slightly<br>increased (2-3<br>x per day) | 0 =<br>None                     | 0 =<br>>20g/l | 0 = none | 0 = no puritis | 1 |
| 1 | BIO<br>EC2<br>015 | RVB<br>32 | 3 | 0 =<br>normal                    | 0 = normal                | 0 = normal                         | 0 = normal                                                       | 1 = slightly<br>increased (2-3<br>x per day) | 0 =<br>None                     | 0 =<br>>20g/l | 0 = none | 0 = no puritis | 1 |
| 1 | BIO<br>EC2<br>015 | RVB<br>32 | 7 | 0 =<br>normal                    | 0 = normal                | 0 = normal                         | 0 = normal                                                       | 1 = slightly<br>increased (2-3<br>x per day) | 0 =<br>None                     | 0 =<br>>20g/l | 0 = none | 0 = no puritis | 1 |
| 1 | BIO<br>EC2<br>015 | RVB<br>35 | 1 | 1 =<br>slightly<br>decrease<br>d | 0 = normal                | 0 = normal                         | 1 = slightly soft<br>faeces or faecal<br>blood, mucus or<br>both | 1 = slightly<br>increased (2-3<br>x per day) | 2 =<br>modera<br>te (5-<br>10%) | 0 =<br>>20g/l | 0 = none | 0 = no puritis | 5 |
| 1 | BIO<br>EC2<br>015 | RVB<br>35 | 2 | 0 =<br>normal                    | 0 = normal                | 0 = normal                         | 0 = normal                                                       | 1 = slightly<br>increased (2-3<br>x per day) | 2 =<br>modera<br>te (5-<br>10%) | 0 =<br>>20g/l | 0 = none | 0 = no puritis | 3 |
| 1 | BIO<br>EC2<br>015 | RVB<br>35 | 3 | 0 =<br>normal                    | 0 = normal                | 0 = normal                         | 0 = normal                                                       | 1 = slightly<br>increased (2-3<br>x per day) | 1 =<br>mild<br>(<5%)            | 0 =<br>>20g/l | 0 = none | 0 = no puritis | 2 |
| 1 | BIO<br>EC2<br>015 | RVB<br>35 | 7 | 0 =<br>normal                    | 0 = normal                | 0 = normal                         | 0 = normal                                                       | 1 = slightly<br>increased (2-3<br>x per day) | 0 =<br>None                     | 0 =<br>>20g/l | 0 = none | 0 = no puritis | 1 |
| 2 | Plac<br>ebo       | RVB<br>02 | 1 | 1 =<br>slightly<br>decrease<br>d | 1 = slightly<br>decreased | 1 = mild (up<br>to once a<br>week) | 1 = slightly soft<br>faeces or faecal<br>blood, mucus or<br>both | 1 = slightly<br>increased (2-3<br>x per day) | 0 =<br>None                     | 0 =<br>>20g/l | 0 = none | 0 = no puritis | 5 |
| 2 | Plac<br>ebo       | RVB<br>02 | 2 | 0 =<br>normal                    | 0 = normal                | 0 = normal                         | 0 = normal                                                       | 0 = normal                                   | 1 =<br>mild<br>(<5%)            | 0 =<br>>20g/l | 0 = none | 0 = no puritis | 1 |
| 2 | Plac<br>ebo       | RVB<br>02 | 3 | 0 =<br>normal                    | 0 = normal                | 1 = mild (up<br>to once a<br>week) | 0 = normal                                                       | 1 = slightly<br>increased (2-3<br>x per day) | 0 =<br>None                     | 0 =<br>>20g/l | 0 = none | 0 = no puritis | 2 |

|   |             |           |   |               |                           |                                    |                         |                                                   |                             |                    |                                               |                |    |
|---|-------------|-----------|---|---------------|---------------------------|------------------------------------|-------------------------|---------------------------------------------------|-----------------------------|--------------------|-----------------------------------------------|----------------|----|
| 2 | Plac<br>ebo | RVB<br>02 | 7 | 0 =<br>normal | 0 = normal                | 0 = normal                         | 0 = normal              | 0 = normal                                        | 0 =<br>None                 | 0 =<br>>20g/l      | 0 = none                                      | 0 = no puritis | 0  |
| 2 | Plac<br>ebo | RVB<br>05 | 1 | 0 =<br>normal | 0 = normal                | 0 = normal                         | 4 = watery<br>diarrhoea | 2 =<br>moderately<br>increased (4-5<br>x per day) | 2 =<br>moderate (5-<br>10%) | 1 = 15-<br>19.9g/l | 1 = mild<br>ascites or<br>peripheral<br>edema | 0 = no puritis | 10 |
| 2 | Plac<br>ebo | RVB<br>09 | 1 | 0 =<br>normal | 0 = normal                | 0 = normal                         | 4 = watery<br>diarrhoea | 1 = slightly<br>increased (2-3<br>x per day)      | 0 =<br>None                 | 0 =<br>>20g/l      | 0 = none                                      | 0 = no puritis | 5  |
| 2 | Plac<br>ebo | RVB<br>09 | 2 | 0 =<br>normal | 0 = normal                | 0 = normal                         | 4 = watery<br>diarrhoea | 0 = normal                                        | 0 =<br>None                 | 1 = 15-<br>19.9g/l | 0 = none                                      | 0 = no puritis | 5  |
| 2 | Plac<br>ebo | RVB<br>09 | 3 | 0 =<br>normal | 1 = slightly<br>decreased | 0 = normal                         | 4 = watery<br>diarrhoea | 0 = normal                                        | 3 =<br>severe<br>(>10%)     | 1 = 15-<br>19.9g/l | 0 = none                                      | 0 = no puritis | 9  |
| 2 | Plac<br>ebo | RVB<br>11 | 1 | 0 =<br>normal | 0 = normal                | 1 = mild (up<br>to once a<br>week) | 4 = watery<br>diarrhoea | 3 = severely<br>increased (>5<br>x per day)       | 1 =<br>mild<br>(<5%)        | 0 =<br>>20g/l      | 0 = none                                      | 0 = no puritis | 9  |
| 2 | Plac<br>ebo | RVB<br>11 | 2 | 0 =<br>normal | 0 = normal                | 0 = normal                         | 0 = normal              | 2 =<br>moderately<br>increased (4-5<br>x per day) | 0 =<br>None                 | 0 =<br>>20g/l      | 0 = none                                      | 0 = no puritis | 2  |
| 2 | Plac<br>ebo | RVB<br>11 | 3 | 0 =<br>normal | 0 = normal                | 1 = mild (up<br>to once a<br>week) | 0 = normal              | 3 = severely<br>increased (>5<br>x per day)       | 0 =<br>None                 | 0 =<br>>20g/l      | 0 = none                                      | 0 = no puritis | 4  |
| 2 | Plac<br>ebo | RVB<br>11 | 7 | 0 =<br>normal | 0 = normal                | 0 = normal                         | 3 = severe              | 3 = severely<br>increased (>5<br>x per day)       | 0 =<br>None                 | 0 =<br>>20g/l      | 0 = none                                      | 0 = no puritis | 6  |
| 2 | Plac<br>ebo | RVB<br>12 | 1 | 0 =<br>normal | 0 = normal                | 1 = mild (up<br>to once a<br>week) | 0 = normal              | 0 = normal                                        | 0 =<br>None                 | 0 =<br>>20g/l      | 0 = none                                      | 0 = no puritis | 1  |
| 2 | Plac<br>ebo | RVB<br>12 | 2 | 0 =<br>normal | 0 = normal                | 0 = normal                         | 0 = normal              | 0 = normal                                        | 0 =<br>None                 | 0 =<br>>20g/l      | 0 = none                                      | 0 = no puritis | 0  |

A study investigating the efficacy of BIOEC2015 in reducing the clinical signs associated with canine inflammatory bowel disease (IBD)

FINAL



|   |             |           |   |                                        |                              |                                    |                         |                                                   |                                 |               |          |                |    |
|---|-------------|-----------|---|----------------------------------------|------------------------------|------------------------------------|-------------------------|---------------------------------------------------|---------------------------------|---------------|----------|----------------|----|
| 2 | Plac<br>ebo | RVB<br>12 | 3 | 0 =<br>normal                          | 1 = slightly<br>decreased    | 1 = mild (up<br>to once a<br>week) | 3 = severe              | 0 = normal                                        | 1 =<br>mild<br>(<5%)            | 0 =<br>>20g/l | 0 = none | 0 = no puritis | 6  |
| 2 | Plac<br>ebo | RVB<br>20 | 1 | 0 =<br>normal                          | 0 = normal                   | 0 = normal                         | 3 = severe              | 1 = slightly<br>increased (2-3<br>x per day)      | 1 =<br>mild<br>(<5%)            | 0 =<br>>20g/l | 0 = none | 0 = no puritis | 5  |
| 2 | Plac<br>ebo | RVB<br>20 | 2 | 0 =<br>normal                          | 0 = normal                   | 1 = mild (up<br>to once a<br>week) | 2 = very soft<br>faeces | 0 = normal                                        | 0 =<br>None                     | 0 =<br>>20g/l | 0 = none | 0 = no puritis | 3  |
| 2 | Plac<br>ebo | RVB<br>20 | 3 | 0 =<br>normal                          | 0 = normal                   | 0 = normal                         | 0 = normal              | 2 =<br>moderately<br>increased (4-5<br>x per day) | 0 =<br>None                     | 0 =<br>>20g/l | 0 = none | 0 = no puritis | 2  |
| 2 | Plac<br>ebo | RVB<br>20 | 7 | 0 =<br>normal                          | 0 = normal                   | 0 = normal                         | 0 = normal              | 2 =<br>moderately<br>increased (4-5<br>x per day) | 0 =<br>None                     | 0 =<br>>20g/l | 0 = none | 0 = no puritis | 2  |
| 2 | Plac<br>ebo | RVB<br>28 | 1 | 1 =<br>slightly<br>decrease<br>d       | 0 = normal                   | 0 = normal                         | 4 = watery<br>diarrhoea | 2 =<br>moderately<br>increased (4-5<br>x per day) | 0 =<br>None                     | 0 =<br>>20g/l | 0 = none | 0 = no puritis | 7  |
| 2 | Plac<br>ebo | RVB<br>28 | 2 | 0 =<br>normal                          | 0 = normal                   | 0 = normal                         | 2 = very soft<br>faeces | 1 = slightly<br>increased (2-3<br>x per day)      | 1 =<br>mild<br>(<5%)            | 0 =<br>>20g/l | 0 = none | 0 = no puritis | 4  |
| 2 | Plac<br>ebo | RVB<br>30 | 1 | 2 =<br>moderat<br>ely<br>decrease<br>d | 3 =<br>severely<br>decreased | 0 = normal                         | 3 = severe              | 0 = normal                                        | 2 =<br>modera<br>te (5-<br>10%) | 0 =<br>>20g/l | 0 = none | 0 = no puritis | 10 |
| 2 | Plac<br>ebo | RVB<br>30 | 2 | 0 =<br>normal                          | 0 = normal                   | 0 = normal                         | 0 = normal              | 1 = slightly<br>increased (2-3<br>x per day)      | 0 =<br>None                     | 0 =<br>>20g/l | 0 = none | 0 = no puritis | 1  |

|   |             |           |   |               |            |                                    |                         |                                              |                      |               |          |                                       |   |
|---|-------------|-----------|---|---------------|------------|------------------------------------|-------------------------|----------------------------------------------|----------------------|---------------|----------|---------------------------------------|---|
| 2 | Plac<br>ebo | RVB<br>31 | 1 | 0 =<br>normal | 0 = normal | 0 = normal                         | 2 = very soft<br>faeces | 1 = slightly<br>increased (2-3<br>x per day) | 0 =<br>None          | 0 =<br>>20g/l | 0 = none | 1 = occasional<br>episodes of itching | 4 |
| 2 | Plac<br>ebo | RVB<br>31 | 2 | 0 =<br>normal | 0 = normal | 0 = normal                         | 0 = normal              | 0 = normal                                   | 0 =<br>None          | 0 =<br>>20g/l | 0 = none | 1 = occasional<br>episodes of itching | 1 |
| 2 | Plac<br>ebo | RVB<br>31 | 3 | 0 =<br>normal | 0 = normal | 0 = normal                         | 0 = normal              | 0 = normal                                   | 0 =<br>None          | 0 =<br>>20g/l | 0 = none | 1 = occasional<br>episodes of itching | 1 |
| 2 | Plac<br>ebo | RVB<br>31 | 7 | 0 =<br>normal | 0 = normal | 0 = normal                         | 0 = normal              | 0 = normal                                   | 0 =<br>None          | 0 =<br>>20g/l | 0 = none | 0 = no puritis                        | 0 |
| 2 | Plac<br>ebo | RVB<br>34 | 1 | 0 =<br>normal | 0 = normal | 3 = severe<br>(>3x per<br>week)    | 0 = normal              | 0 = normal                                   | 1 =<br>mild<br>(<5%) | 0 =<br>>20g/l | 0 = none | 0 = no puritis                        | 4 |
| 2 | Plac<br>ebo | RVB<br>34 | 2 | 0 =<br>normal | 0 = normal | 1 = mild (up<br>to once a<br>week) | 0 = normal              | 1 = slightly<br>increased (2-3<br>x per day) | 1 =<br>mild<br>(<5%) | 0 =<br>>20g/l | 0 = none | 0 = no puritis                        | 3 |
| 2 | Plac<br>ebo | RVB<br>34 | 3 | 0 =<br>normal | 0 = normal | 1 = mild (up<br>to once a<br>week) | 0 = normal              | 1 = slightly<br>increased (2-3<br>x per day) | 0 =<br>None          | 0 =<br>>20g/l | 0 = none | 0 = no puritis                        | 2 |
| 2 | Plac<br>ebo | RVB<br>34 | 7 | 0 =<br>normal | 0 = normal | 0 = normal                         | 0 = normal              | 1 = slightly<br>increased (2-3<br>x per day) | 0 =<br>None          | 0 =<br>>20g/l | 0 = none | 0 = no puritis                        | 1 |

TABLE A23. CIBDAI scores.

| Group | Treatment  | Patient No. | Visit No. | Attitude/Activity Score | Appetite Score           | Vomiting Score               | Stool Consistency Score                                 | Stool Frequency Score                  | Weight Loss Score    | CIBDAI Total |
|-------|------------|-------------|-----------|-------------------------|--------------------------|------------------------------|---------------------------------------------------------|----------------------------------------|----------------------|--------------|
| 1     | BIOEC 2015 | RVB0 1      | 1         | 0 = normal              | 0 = normal               | 0 = normal                   | 1 = slightly soft faeces or faecal blood, mucus or both | 1 = slightly increased (2-3 x per day) | 0 = None             | 2            |
| 1     | BIOEC 2015 | RVB0 1      | 2         | 1 = slightly decreased  | 0 = normal               | 1 = mild (up to once a week) | 0 = normal                                              | 0 = normal                             | 0 = None             | 2            |
| 1     | BIOEC 2015 | RVB0 1      | 3         | 0 = normal              | 0 = normal               | 0 = normal                   | 1 = slightly soft faeces or faecal blood, mucus or both | 1 = slightly increased (2-3 x per day) | 1 = mild (<5%)       | 3            |
| 1     | BIOEC 2015 | RVB0 1      | 4         | 0 = normal              | 0 = normal               | 0 = normal                   | 0 = normal                                              | 0 = normal                             | 0 = None             | 0            |
| 1     | BIOEC 2015 | RVB0 1      | 5         | 0 = normal              | 0 = normal               | 0 = normal                   | 1 = slightly soft faeces or faecal blood, mucus or both | 0 = normal                             | 0 = None             | 1            |
| 1     | BIOEC 2015 | RVB0 1      | 6         | 0 = normal              | 0 = normal               | 0 = normal                   | 0 = normal                                              | 0 = normal                             | 0 = None             | 0            |
| 1     | BIOEC 2015 | RVB0 1      | 7         | 0 = normal              | 0 = normal               | 0 = normal                   | 0 = normal                                              | 1 = slightly increased (2-3 x per day) | 0 = None             | 1            |
| 1     | BIOEC 2015 | RVB0 7      | 1         | 0 = normal              | 0 = normal               | 0 = normal                   | 4 = watery diarrhoea                                    | 1 = slightly increased (2-3 x per day) | 1 = mild (<5%)       | 6            |
| 1     | BIOEC 2015 | RVB0 7      | 2         | 0 = normal              | 0 = normal               | 0 = normal                   | 4 = watery diarrhoea                                    | 0 = normal                             | 1 = mild (<5%)       | 5            |
| 1     | BIOEC 2015 | RVB0 8      | 1         | 0 = normal              | 0 = normal               | 0 = normal                   | 2 = very soft faeces                                    | 3 = severely increased (>5 x per day)  | 2 = moderate (5-10%) | 7            |
| 1     | BIOEC 2015 | RVB0 8      | 2         | 0 = normal              | 2 = moderately decreased | 0 = normal                   | 0 = normal                                              | 1 = slightly increased (2-3 x per day) | 0 = None             | 3            |
| 1     | BIOEC 2015 | RVB0 8      | 4         | 0 = normal              | 0 = normal               | 0 = normal                   | 1 = slightly soft faeces or faecal blood, mucus or both | 0 = normal                             | 0 = None             | 1            |
| 1     | BIOEC 2015 | RVB0 8      | 5         | 0 = normal              | 0 = normal               | 0 = normal                   | 0 = normal                                              | 0 = normal                             | 0 = None             | 0            |
| 1     | BIOEC 2015 | RVB0 8      | 6         | 0 = normal              | 0 = normal               | 0 = normal                   | 0 = normal                                              | 0 = normal                             | 1 = mild (<5%)       | 1            |

A study investigating the efficacy of BIOEC2015 in reducing the clinical signs associated with canine inflammatory bowel disease (IBD)

FINAL

|   |            |        |   |                        |                        |                                   |                                                         |                                          |                      |   |
|---|------------|--------|---|------------------------|------------------------|-----------------------------------|---------------------------------------------------------|------------------------------------------|----------------------|---|
| 1 | BIOEC 2015 | RVB0 8 | 7 | 0 = normal             | 0 = normal             | 0 = normal                        | 0 = normal                                              | 1 = slightly increased (2-3 x per day)   | 0 = None             | 1 |
| 1 | BIOEC 2015 | RVB0 8 | 3 | 0 = normal             | 1 = slightly decreased | 0 = normal                        | 1 = slightly soft faeces or faecal blood, mucus or both | 1 = slightly increased (2-3 x per day)   | 0 = None             | 3 |
| 1 | BIOEC 2015 | RVB1 3 | 1 | 0 = normal             | 0 = normal             | 3 = severe (>3x per week)         | 0 = normal                                              | 0 = normal                               | 1 = mild (<5%)       | 4 |
| 1 | BIOEC 2015 | RVB1 3 | 3 | 0 = normal             | 0 = normal             | 1 = mild (up to once a week)      | 0 = normal                                              | 0 = normal                               | 0 = None             | 1 |
| 1 | BIOEC 2015 | RVB1 3 | 4 | 0 = normal             | 0 = normal             | 0 = normal                        | 0 = normal                                              | 0 = normal                               | 1 = mild (<5%)       | 1 |
| 1 | BIOEC 2015 | RVB1 3 | 5 | 0 = normal             | 0 = normal             | 1 = mild (up to once a week)      | 2 = very soft faeces                                    | 0 = normal                               | 1 = mild (<5%)       | 4 |
| 1 | BIOEC 2015 | RVB1 3 | 6 | 0 = normal             | 0 = normal             | 0 = normal                        | 0 = normal                                              | 0 = normal                               | 0 = None             | 0 |
| 1 | BIOEC 2015 | RVB1 3 | 7 | 0 = normal             | 0 = normal             | 0 = normal                        | 0 = normal                                              | 1 = slightly increased (2-3 x per day)   | 0 = None             | 1 |
| 1 | BIOEC 2015 | RVB1 3 | 2 | 0 = normal             | 0 = normal             | 0 = normal                        | 0 = normal                                              | 0 = normal                               | 0 = None             | 0 |
| 1 | BIOEC 2015 | RVB1 6 | 1 | 1 = slightly decreased | 0 = normal             | 2 = moderate (1-3 times per week) | 1 = slightly soft faeces or faecal blood, mucus or both | 2 = moderately increased (4-5 x per day) | 0 = None             | 6 |
| 1 | BIOEC 2015 | RVB1 6 | 2 | 1 = slightly decreased | 1 = slightly decreased | 2 = moderate (1-3 times per week) | 1 = slightly soft faeces or faecal blood, mucus or both | 1 = slightly increased (2-3 x per day)   | 2 = moderate (5-10%) | 8 |
| 1 | BIOEC 2015 | RVB1 6 | 3 | 1 = slightly decreased | 1 = slightly decreased | 2 = moderate (1-3 times per week) | 1 = slightly soft faeces or faecal blood, mucus or both | 1 = slightly increased (2-3 x per day)   | 1 = mild (<5%)       | 7 |
| 1 | BIOEC 2015 | RVB1 6 | 4 | 1 = slightly decreased | 0 = normal             | 2 = moderate (1-3 times per week) | 0 = normal                                              | 1 = slightly increased (2-3 x per day)   | 0 = None             | 4 |
| 1 | BIOEC 2015 | RVB1 6 | 5 | 0 = normal             | 0 = normal             | 0 = normal                        | 0 = normal                                              | 0 = normal                               | 0 = None             | 0 |
| 1 | BIOEC 2015 | RVB1 6 | 6 | 0 = normal             | 0 = normal             | 0 = normal                        | 0 = normal                                              | 3 = severely increased (>5 x per day)    | 0 = None             | 3 |
| 1 | BIOEC 2015 | RVB1 6 | 7 | 0 = normal             | 0 = normal             | 0 = normal                        | 0 = normal                                              | 2 = moderately increased (4-5 x per day) | 0 = None             | 2 |

A study investigating the efficacy of BIOEC2015 in reducing the clinical signs associated with canine inflammatory bowel disease (IBD)

FINAL

|   |            |        |   |                          |                        |                                   |                                                         |                                        |                      |   |
|---|------------|--------|---|--------------------------|------------------------|-----------------------------------|---------------------------------------------------------|----------------------------------------|----------------------|---|
| 1 | BIOEC 2015 | RVB1 8 | 1 | 1 = slightly decreased   | 1 = slightly decreased | 3 = severe (>3x per week)         | 0 = normal                                              | 1 = slightly increased (2-3 x per day) | 0 = None             | 6 |
| 1 | BIOEC 2015 | RVB1 8 | 2 | 0 = normal               | 0 = normal             | 0 = normal                        | 0 = normal                                              | 0 = normal                             | 0 = None             | 0 |
| 1 | BIOEC 2015 | RVB1 8 | 3 | 0 = normal               | 0 = normal             | 1 = mild (up to once a week)      | 0 = normal                                              | 0 = normal                             | 0 = None             | 1 |
| 1 | BIOEC 2015 | RVB1 8 | 4 | 2 = moderately decreased | 1 = slightly decreased | 2 = moderate (1-3 times per week) | 1 = slightly soft faeces or faecal blood, mucus or both | 0 = normal                             | 0 = None             | 6 |
| 1 | BIOEC 2015 | RVB1 8 | 5 | 0 = normal               | 0 = normal             | 1 = mild (up to once a week)      | 0 = normal                                              | 0 = normal                             | 0 = None             | 1 |
| 1 | BIOEC 2015 | RVB1 8 | 6 | 0 = normal               | 0 = normal             | 0 = normal                        | 0 = normal                                              | 1 = slightly increased (2-3 x per day) | 0 = None             | 1 |
| 1 | BIOEC 2015 | RVB1 8 | 7 | 0 = normal               | 0 = normal             | 0 = normal                        | 0 = normal                                              | 1 = slightly increased (2-3 x per day) | 0 = None             | 1 |
| 1 | BIOEC 2015 | RVB2 7 | 1 | 0 = normal               | 0 = normal             | 2 = moderate (1-3 times per week) | 1 = slightly soft faeces or faecal blood, mucus or both | 1 = slightly increased (2-3 x per day) | 1 = mild (<5%)       | 5 |
| 1 | BIOEC 2015 | RVB2 9 | 1 | 0 = normal               | 0 = normal             | 2 = moderate (1-3 times per week) | 0 = normal                                              | 0 = normal                             | 1 = mild (<5%)       | 3 |
| 1 | BIOEC 2015 | RVB2 9 | 2 | 0 = normal               | 1 = slightly decreased | 0 = normal                        | 0 = normal                                              | 0 = normal                             | 1 = mild (<5%)       | 2 |
| 1 | BIOEC 2015 | RVB2 9 | 3 | 0 = normal               | 0 = normal             | 0 = normal                        | 0 = normal                                              | 0 = normal                             | 0 = None             | 0 |
| 1 | BIOEC 2015 | RVB2 9 | 4 | 0 = normal               | 0 = normal             | 0 = normal                        | 0 = normal                                              | 0 = normal                             | 0 = None             | 0 |
| 1 | BIOEC 2015 | RVB2 9 | 5 | 0 = normal               | 0 = normal             | 0 = normal                        | 0 = normal                                              | 0 = normal                             | 0 = None             | 0 |
| 1 | BIOEC 2015 | RVB2 9 | 6 | 0 = normal               | 1 = slightly decreased | 0 = normal                        | 1 = slightly soft faeces or faecal blood, mucus or both | 1 = slightly increased (2-3 x per day) | 0 = None             | 3 |
| 1 | BIOEC 2015 | RVB2 9 | 7 | 0 = normal               | 1 = slightly decreased | 0 = normal                        | 0 = normal                                              | 0 = normal                             | 0 = None             | 1 |
| 1 | BIOEC 2015 | RVB3 2 | 1 | 0 = normal               | 0 = normal             | 1 = mild (up to once a week)      | 1 = slightly soft faeces or faecal blood, mucus or both | 1 = slightly increased (2-3 x per day) | 2 = moderate (5-10%) | 5 |

A study investigating the efficacy of BIOEC2015 in reducing the clinical signs associated with canine inflammatory bowel disease (IBD)

FINAL

|   |            |        |   |                        |                        |                              |                                                         |                                        |                      |   |
|---|------------|--------|---|------------------------|------------------------|------------------------------|---------------------------------------------------------|----------------------------------------|----------------------|---|
| 1 | BIOEC 2015 | RVB3 2 | 2 | 0 = normal             | 0 = normal             | 0 = normal                   | 0 = normal                                              | 1 = slightly increased (2-3 x per day) | 0 = None             | 1 |
| 1 | BIOEC 2015 | RVB3 2 | 3 | 0 = normal             | 0 = normal             | 0 = normal                   | 0 = normal                                              | 1 = slightly increased (2-3 x per day) | 0 = None             | 1 |
| 1 | BIOEC 2015 | RVB3 2 | 4 | 0 = normal             | 0 = normal             | 0 = normal                   | 0 = normal                                              | 1 = slightly increased (2-3 x per day) | 0 = None             | 1 |
| 1 | BIOEC 2015 | RVB3 2 | 5 | 0 = normal             | 0 = normal             | 0 = normal                   | 0 = normal                                              | 1 = slightly increased (2-3 x per day) | 0 = None             | 1 |
| 1 | BIOEC 2015 | RVB3 2 | 6 | 0 = normal             | 0 = normal             | 0 = normal                   | 0 = normal                                              | 1 = slightly increased (2-3 x per day) | 0 = None             | 1 |
| 1 | BIOEC 2015 | RVB3 2 | 7 | 0 = normal             | 0 = normal             | 0 = normal                   | 0 = normal                                              | 1 = slightly increased (2-3 x per day) | 0 = None             | 1 |
| 1 | BIOEC 2015 | RVB3 5 | 1 | 1 = slightly decreased | 0 = normal             | 0 = normal                   | 1 = slightly soft faeces or faecal blood, mucus or both | 1 = slightly increased (2-3 x per day) | 2 = moderate (5-10%) | 5 |
| 1 | BIOEC 2015 | RVB3 5 | 2 | 0 = normal             | 0 = normal             | 0 = normal                   | 0 = normal                                              | 1 = slightly increased (2-3 x per day) | 2 = moderate (5-10%) | 3 |
| 1 | BIOEC 2015 | RVB3 5 | 3 | 0 = normal             | 0 = normal             | 0 = normal                   | 0 = normal                                              | 1 = slightly increased (2-3 x per day) | 1 = mild (<5%)       | 2 |
| 1 | BIOEC 2015 | RVB3 5 | 4 | 0 = normal             | 0 = normal             | 0 = normal                   | 0 = normal                                              | 0 = normal                             | 0 = None             | 0 |
| 1 | BIOEC 2015 | RVB3 5 | 5 | 0 = normal             | 0 = normal             | 0 = normal                   | 0 = normal                                              | 0 = normal                             | 0 = None             | 0 |
| 1 | BIOEC 2015 | RVB3 5 | 6 | 0 = normal             | 0 = normal             | 0 = normal                   | 0 = normal                                              | 0 = normal                             | 0 = None             | 0 |
| 1 | BIOEC 2015 | RVB3 5 | 7 | 0 = normal             | 0 = normal             | 0 = normal                   | 0 = normal                                              | 1 = slightly increased (2-3 x per day) | 0 = None             | 1 |
| 2 | Place bo   | RVB0 2 | 1 | 1 = slightly decreased | 1 = slightly decreased | 1 = mild (up to once a week) | 1 = slightly soft faeces or faecal blood, mucus or both | 1 = slightly increased (2-3 x per day) | 0 = None             | 5 |
| 2 | Place bo   | RVB0 2 | 2 | 0 = normal             | 0 = normal             | 0 = normal                   | 0 = normal                                              | 0 = normal                             | 1 = mild (<5%)       | 1 |
| 2 | Place bo   | RVB0 2 | 3 | 0 = normal             | 0 = normal             | 1 = mild (up to once a week) | 0 = normal                                              | 1 = slightly increased (2-3 x per day) | 0 = None             | 2 |
| 2 | Place bo   | RVB0 2 | 4 | 0 = normal             | 0 = normal             | 0 = normal                   | 0 = normal                                              | 0 = normal                             | 1 = mild (<5%)       | 1 |

A study investigating the efficacy of BIOEC2015 in reducing the clinical signs associated with canine inflammatory bowel disease (IBD)

FINAL

|   |          |        |   |            |                        |                              |                                                         |                                          |                      |   |
|---|----------|--------|---|------------|------------------------|------------------------------|---------------------------------------------------------|------------------------------------------|----------------------|---|
| 2 | Place bo | RVB0 2 | 5 | 0 = normal | 0 = normal             | 0 = normal                   | 0 = normal                                              | 0 = normal                               | 0 = None             | 0 |
| 2 | Place bo | RVB0 2 | 6 | 0 = normal | 0 = normal             | 0 = normal                   | 0 = normal                                              | 0 = normal                               | 0 = None             | 0 |
| 2 | Place bo | RVB0 2 | 7 | 0 = normal | 0 = normal             | 0 = normal                   | 0 = normal                                              | 0 = normal                               | 0 = None             | 0 |
| 2 | Place bo | RVB0 5 | 1 | 0 = normal | 0 = normal             | 0 = normal                   | 4 = watery diarrhoea                                    | 2 = moderately increased (4-5 x per day) | 2 = moderate (5-10%) | 8 |
| 2 | Place bo | RVB0 9 | 1 | 0 = normal | 0 = normal             | 0 = normal                   | 4 = watery diarrhoea                                    | 1 = slightly increased (2-3 x per day)   | 0 = None             | 5 |
| 2 | Place bo | RVB0 9 | 2 | 0 = normal | 0 = normal             | 0 = normal                   | 4 = watery diarrhoea                                    | 0 = normal                               | 0 = None             | 4 |
| 2 | Place bo | RVB0 9 | 3 | 0 = normal | 1 = slightly decreased | 0 = normal                   | 4 = watery diarrhoea                                    | 0 = normal                               | 3 = severe (>10%)    | 8 |
| 2 | Place bo | RVB1 1 | 1 | 0 = normal | 0 = normal             | 1 = mild (up to once a week) | 4 = watery diarrhoea                                    | 3 = severely increased (>5 x per day)    | 1 = mild (<5%)       | 9 |
| 2 | Place bo | RVB1 1 | 2 | 0 = normal | 0 = normal             | 0 = normal                   | 0 = normal                                              | 2 = moderately increased (4-5 x per day) | 0 = None             | 2 |
| 2 | Place bo | RVB1 1 | 3 | 0 = normal | 0 = normal             | 1 = mild (up to once a week) | 0 = normal                                              | 3 = severely increased (>5 x per day)    | 0 = None             | 4 |
| 2 | Place bo | RVB1 1 | 4 | 0 = normal | 0 = normal             | 0 = normal                   | 0 = normal                                              | 3 = severely increased (>5 x per day)    | 0 = None             | 3 |
| 2 | Place bo | RVB1 1 | 5 | 0 = normal | 0 = normal             | 0 = normal                   | 1 = slightly soft faeces or faecal blood, mucus or both | 3 = severely increased (>5 x per day)    | 1 = mild (<5%)       | 5 |
| 2 | Place bo | RVB1 1 | 6 | 0 = normal | 0 = normal             | 0 = normal                   | 0 = normal                                              | 3 = severely increased (>5 x per day)    | 0 = None             | 3 |
| 2 | Place bo | RVB1 1 | 7 | 0 = normal | 0 = normal             | 0 = normal                   | 3 = severe                                              | 3 = severely increased (>5 x per day)    | 0 = None             | 6 |
| 2 | Place bo | RVB1 2 | 1 | 0 = normal | 0 = normal             | 1 = mild (up to once a week) | 0 = normal                                              | 0 = normal                               | 0 = None             | 1 |
| 2 | Place bo | RVB1 2 | 2 | 0 = normal | 0 = normal             | 0 = normal                   | 0 = normal                                              | 0 = normal                               | 0 = None             | 0 |
| 2 | Place bo | RVB1 2 | 3 | 0 = normal | 1 = slightly decreased | 1 = mild (up to once a week) | 3 = severe                                              | 0 = normal                               | 1 = mild (<5%)       | 6 |

A study investigating the efficacy of BIOEC2015 in reducing the clinical signs associated with canine inflammatory bowel disease (IBD)

FINAL

|   |          |        |   |                          |                        |                              |                                                         |                                          |                      |    |
|---|----------|--------|---|--------------------------|------------------------|------------------------------|---------------------------------------------------------|------------------------------------------|----------------------|----|
| 2 | Place bo | RVB2 0 | 1 | 0 = normal               | 0 = normal             | 0 = normal                   | 3 = severe                                              | 1 = slightly increased (2-3 x per day)   | 1 = mild (<5%)       | 5  |
| 2 | Place bo | RVB2 0 | 2 | 0 = normal               | 0 = normal             | 1 = mild (up to once a week) | 2 = very soft faeces                                    | 0 = normal                               | 0 = None             | 3  |
| 2 | Place bo | RVB2 0 | 3 | 0 = normal               | 0 = normal             | 0 = normal                   | 0 = normal                                              | 2 = moderately increased (4-5 x per day) | 0 = None             | 2  |
| 2 | Place bo | RVB2 0 | 4 | 1 = slightly decreased   | 0 = normal             | 0 = normal                   | 1 = slightly soft faeces or faecal blood, mucus or both | 1 = slightly increased (2-3 x per day)   | 0 = None             | 3  |
| 2 | Place bo | RVB2 0 | 5 | 0 = normal               | 0 = normal             | 0 = normal                   | 0 = normal                                              | 1 = slightly increased (2-3 x per day)   | 0 = None             | 1  |
| 2 | Place bo | RVB2 0 | 6 | 0 = normal               | 0 = normal             | 1 = mild (up to once a week) | 0 = normal                                              | 1 = slightly increased (2-3 x per day)   | 0 = None             | 2  |
| 2 | Place bo | RVB2 0 | 7 | 0 = normal               | 0 = normal             | 0 = normal                   | 0 = normal                                              | 2 = moderately increased (4-5 x per day) | 0 = None             | 2  |
| 2 | Place bo | RVB2 8 | 1 | 1 = slightly decreased   | 0 = normal             | 0 = normal                   | 4 = watery diarrhoea                                    | 2 = moderately increased (4-5 x per day) | 0 = None             | 7  |
| 2 | Place bo | RVB2 8 | 2 | 0 = normal               | 0 = normal             | 0 = normal                   | 2 = very soft faeces                                    | 1 = slightly increased (2-3 x per day)   | 1 = mild (<5%)       | 4  |
| 2 | Place bo | RVB3 0 | 1 | 2 = moderately decreased | 3 = severely decreased | 0 = normal                   | 3 = severe                                              | 0 = normal                               | 2 = moderate (5-10%) | 10 |
| 2 | Place bo | RVB3 0 | 2 | 0 = normal               | 0 = normal             | 0 = normal                   | 0 = normal                                              | 1 = slightly increased (2-3 x per day)   | 0 = None             | 1  |
| 2 | Place bo | RVB3 1 | 1 | 0 = normal               | 0 = normal             | 0 = normal                   | 2 = very soft faeces                                    | 1 = slightly increased (2-3 x per day)   | 0 = None             | 3  |
| 2 | Place bo | RVB3 1 | 2 | 0 = normal               | 0 = normal             | 0 = normal                   | 0 = normal                                              | 0 = normal                               | 0 = None             | 0  |
| 2 | Place bo | RVB3 1 | 3 | 0 = normal               | 0 = normal             | 0 = normal                   | 0 = normal                                              | 0 = normal                               | 0 = None             | 0  |
| 2 | Place bo | RVB3 1 | 4 | 1 = slightly decreased   | 0 = normal             | 0 = normal                   | 0 = normal                                              | 0 = normal                               | 0 = None             | 1  |



|   |             |           |   |            |                           |                                 |                      |                                           |                   |   |
|---|-------------|-----------|---|------------|---------------------------|---------------------------------|----------------------|-------------------------------------------|-------------------|---|
| 2 | Place<br>bo | RVB3<br>1 | 5 | 0 = normal | 1 = slightly<br>decreased | 0 = normal                      | 2 = very soft faeces | 1 = slightly increased<br>(2-3 x per day) | 0 = None          | 4 |
| 2 | Place<br>bo | RVB3<br>1 | 6 | 0 = normal | 0 = normal                | 0 = normal                      | 0 = normal           | 0 = normal                                | 0 = None          | 0 |
| 2 | Place<br>bo | RVB3<br>1 | 7 | 0 = normal | 0 = normal                | 0 = normal                      | 0 = normal           | 0 = normal                                | 0 = None          | 0 |
| 2 | Place<br>bo | RVB3<br>4 | 1 | 0 = normal | 0 = normal                | 3 = severe (>3x per<br>week)    | 0 = normal           | 0 = normal                                | 1 = mild<br>(<5%) | 4 |
| 2 | Place<br>bo | RVB3<br>4 | 2 | 0 = normal | 0 = normal                | 1 = mild (up to<br>once a week) | 0 = normal           | 1 = slightly increased<br>(2-3 x per day) | 1 = mild<br>(<5%) | 3 |
| 2 | Place<br>bo | RVB3<br>4 | 3 | 0 = normal | 0 = normal                | 1 = mild (up to<br>once a week) | 0 = normal           | 1 = slightly increased<br>(2-3 x per day) | 0 = None          | 2 |
| 2 | Place<br>bo | RVB3<br>4 | 4 | 0 = normal | 0 = normal                | 1 = mild (up to<br>once a week) | 0 = normal           | 1 = slightly increased<br>(2-3 x per day) | 0 = None          | 2 |
| 2 | Place<br>bo | RVB3<br>4 | 5 | 0 = normal | 0 = normal                | 0 = normal                      | 0 = normal           | 1 = slightly increased<br>(2-3 x per day) | 0 = None          | 1 |
| 2 | Place<br>bo | RVB3<br>4 | 6 | 0 = normal | 0 = normal                | 0 = normal                      | 0 = normal           | 1 = slightly increased<br>(2-3 x per day) | 0 = None          | 1 |
| 2 | Place<br>bo | RVB3<br>4 | 7 | 0 = normal | 0 = normal                | 0 = normal                      | 0 = normal           | 1 = slightly increased<br>(2-3 x per day) | 0 = None          | 1 |

TABLE A24. WSAVA scores, stomach fundus.

| Group | Treatment | Patient No. | Visit No. | Surface Epithelial Injury | Gastric Pit Epithelial Injury | Fibrosis/GI andular Nesting/Mucosal Atrophy | Intraepithelial Lymphocytes | Lamina Propria Lymphocytes and Plasma Cells | Lamina Propria Eosinophils | Lamina Propria Neutrophils | Gastric Lymphofollicular Hyperplasia | Subtotal |
|-------|-----------|-------------|-----------|---------------------------|-------------------------------|---------------------------------------------|-----------------------------|---------------------------------------------|----------------------------|----------------------------|--------------------------------------|----------|
| 1     | BIOEC2015 | RVB01       | 1         | 0                         | 0                             | 1                                           | 0                           | 0                                           | 0                          | 0                          | 0                                    | 1        |
| 1     | BIOEC2015 | RVB01       | 3         |                           |                               |                                             |                             |                                             |                            |                            |                                      |          |
| 1     | BIOEC2015 | RVB07       | 1         | 0                         | 0                             | 1                                           | 0                           | 1                                           | 0                          | 0                          | 0                                    | 2        |
| 1     | BIOEC2015 | RVB08       | 1         | 0                         | 1                             | 1                                           | 0                           | 0                                           | 0                          | 0                          | 0                                    | 2        |
| 1     | BIOEC2015 | RVB08       | 3         | 0                         | 0                             | 1                                           | 0                           | 0                                           | 0                          | 0                          | 0                                    | 1        |
| 1     | BIOEC2015 | RVB13       | 1         |                           |                               |                                             |                             |                                             |                            |                            |                                      |          |
| 1     | BIOEC2015 | RVB13       | 3         | 1                         | 2                             | 2                                           | 2                           | 3                                           | 0                          | 0                          | 2                                    | 12       |
| 1     | BIOEC2015 | RVB16       | 1         | 0                         | 2                             | 2                                           | 0                           | 2                                           | 0                          | 0                          | 0                                    | 6        |
| 1     | BIOEC2015 | RVB16       | 3         | 0                         | 0                             | 1                                           | 0                           | 1                                           | 0                          | 0                          | 0                                    | 2        |
| 1     | BIOEC2015 | RVB18       | 1         | 0                         | 1                             | 2                                           | 0                           | 1                                           | 0                          | 0                          | 1                                    | 5        |
| 1     | BIOEC2015 | RVB18       | 3         | 0                         | 2                             | 2                                           | 0                           | 2                                           | 0                          | 0                          | 1                                    | 7        |
| 1     | BIOEC2015 | RVB27       | 1         | 0                         | 0                             | 1                                           | 0                           | 0                                           | 0                          | 0                          | 0                                    | 1        |
| 1     | BIOEC2015 | RVB29       | 1         | 1                         | 0                             | 1                                           | 0                           | 0                                           | 0                          | 0                          | 0                                    | 2        |

A study investigating the efficacy of BIOEC2015 in reducing the clinical signs associated with canine inflammatory bowel disease (IBD)

FINAL

|   |           |       |   |   |   |   |   |   |   |   |   |   |
|---|-----------|-------|---|---|---|---|---|---|---|---|---|---|
| 1 | BIOEC2015 | RVB32 | 1 | 0 | 0 | 1 | 0 | 0 | 0 | 0 | 0 | 1 |
| 1 | BIOEC2015 | RVB32 | 3 |   |   |   |   |   |   |   |   |   |
| 1 | BIOEC2015 | RVB35 | 1 | 0 | 0 | 1 | 0 | 0 | 0 | 0 | 0 | 1 |
| 1 | BIOEC2015 | RVB35 | 3 | 0 | 1 | 1 | 0 | 0 | 0 | 0 | 0 | 2 |
| 2 | Placebo   | RVB02 | 1 | 0 | 0 | 2 | 0 | 0 | 0 | 0 | 0 | 2 |
| 2 | Placebo   | RVB02 | 3 |   |   |   |   |   |   |   |   |   |
| 2 | Placebo   | RVB05 | 1 | 0 | 2 | 2 | 0 | 2 | 0 | 0 | 1 | 7 |
| 2 | Placebo   | RVB09 | 1 | 0 | 0 | 1 | 0 | 0 | 0 | 0 | 0 | 1 |
| 2 | Placebo   | RVB11 | 1 | 0 | 1 | 2 | 0 | 0 | 0 | 0 | 0 | 3 |
| 2 | Placebo   | RVB11 | 3 | 0 | 0 | 1 | 0 | 0 | 0 | 0 | 1 | 2 |
| 2 | Placebo   | RVB12 | 1 | 1 | 2 | 2 | 1 | 2 | 0 | 1 | 0 | 9 |
| 2 | Placebo   | RVB20 | 1 | 0 | 0 | 1 | 0 | 0 | 0 | 0 | 0 | 1 |
| 2 | Placebo   | RVB20 | 3 | 0 | 0 | 2 | 0 | 0 | 0 | 0 | 1 | 3 |
| 2 | Placebo   | RVB28 | 1 | 0 | 0 | 0 | 0 | 0 | 0 | 0 | 0 | 0 |
| 2 | Placebo   | RVB30 | 1 | 0 | 0 | 0 | 0 | 0 | 0 | 0 | 1 | 1 |
| 2 | Placebo   | RVB31 | 1 | 0 | 0 | 0 | 0 | 0 | 0 | 0 | 0 | 0 |
| 2 | Placebo   | RVB34 | 1 | 0 | 0 | 3 | 0 | 0 | 0 | 0 | 1 | 4 |
| 2 | Placebo   | RVB34 | 3 |   |   |   |   |   |   |   |   |   |

TABLE A25. WSAVA scores – Stomach antrum.

| Group | Treatment | Patient No. | Visit No. | Epithelial Injury | Epithelial Hyperplasia | Mucosal Fibrosis Glandular Atrophy | Intraepithelial Lymphocytes | Lamina Propria Lymphocytes and Plasma Cells | Lamina Propria Eosinophils | Lamina Propria Neutrophils | Gastric Lymphofollicular Hyperplasia | Subtotal |
|-------|-----------|-------------|-----------|-------------------|------------------------|------------------------------------|-----------------------------|---------------------------------------------|----------------------------|----------------------------|--------------------------------------|----------|
| 1     | BIOEC2015 | RVB01       | 1         | 0                 | 0                      | 0                                  | 0                           | 0                                           | 0                          | 0                          | 0                                    | 0        |
| 1     | BIOEC2015 | RVB01       | 3         |                   |                        |                                    |                             |                                             |                            |                            |                                      |          |
| 1     | BIOEC2015 | RVB07       | 1         | 0                 | 0                      | 1                                  | 0                           | 0                                           | 0                          | 0                          | 0                                    | 1        |
| 1     | BIOEC2015 | RVB08       | 1         | 0                 | 0                      | 1                                  | 0                           | 0                                           | 0                          | 0                          | 0                                    | 1        |
| 1     | BIOEC2015 | RVB08       | 3         | 0                 | 1                      | 2                                  | 0                           | 1                                           | 0                          | 0                          | 1                                    | 5        |
| 1     | BIOEC2015 | RVB13       | 1         | 2                 | 3                      | 3                                  | 1                           | 3                                           | 0                          | 0                          | 3                                    | 15       |
| 1     | BIOEC2015 | RVB13       | 3         | 1                 | 1                      | 3                                  | 3                           | 2                                           | 0                          | 0                          | 2                                    | 12       |
| 1     | BIOEC2015 | RVB16       | 1         | 0                 | 1                      | 2                                  | 0                           | 1                                           | 0                          | 0                          | 0                                    | 4        |
| 1     | BIOEC2015 | RVB16       | 3         | 0                 | 0                      | 0                                  | 0                           | 0                                           | 0                          | 0                          | 0                                    | 0        |
| 1     | BIOEC2015 | RVB18       | 1         | 0                 | 1                      | 1                                  | 0                           | 0                                           | 0                          | 0                          | 0                                    | 2        |
| 1     | BIOEC2015 | RVB18       | 3         | 0                 | 1                      | 1                                  | 0                           | 0                                           | 0                          | 0                          | 0                                    | 2        |
| 1     | BIOEC2015 | RVB27       | 1         | 0                 | 0                      | 0                                  | 0                           | 0                                           | 0                          | 0                          | 0                                    | 0        |
| 1     | BIOEC2015 | RVB29       | 1         | 0                 | 0                      | 0                                  | 0                           | 0                                           | 0                          | 0                          | 0                                    | 0        |
| 1     | BIOEC2015 | RVB32       | 1         | 0                 | 0                      | 0                                  | 0                           | 0                                           | 0                          | 0                          | 1                                    | 1        |
| 1     | BIOEC2015 | RVB32       | 3         |                   |                        |                                    |                             |                                             |                            |                            |                                      |          |
| 1     | BIOEC2015 | RVB35       | 1         | 0                 | 0                      | 0                                  | 0                           | 0                                           | 0                          | 0                          | 0                                    | 0        |
| 1     | BIOEC2015 | RVB35       | 3         | 0                 | 0                      | 0                                  | 0                           | 0                                           | 0                          | 0                          | 1                                    | 1        |
| 2     | Placebo   | RVB02       | 1         | 0                 | 1                      | 2                                  | 0                           | 0                                           | 0                          | 0                          | 0                                    | 3        |
| 2     | Placebo   | RVB02       | 3         |                   |                        |                                    |                             |                                             |                            |                            |                                      |          |
| 2     | Placebo   | RVB05       | 1         | 0                 | 0                      | 1                                  | 0                           | 0                                           | 0                          | 0                          | 0                                    | 1        |
| 2     | Placebo   | RVB09       | 1         | 0                 | 0                      | 1                                  | 0                           | 0                                           | 0                          | 0                          | 0                                    | 1        |
| 2     | Placebo   | RVB11       | 1         | 0                 | 1                      | 2                                  | 0                           | 0                                           | 0                          | 0                          | 1                                    | 4        |
| 2     | Placebo   | RVB11       | 3         | 0                 | 0                      | 0                                  | 0                           | 0                                           | 0                          | 0                          | 0                                    | 0        |
| 2     | Placebo   | RVB12       | 1         | 1                 | 0                      | 2                                  | 1                           | 2                                           | 0                          | 0                          | 0                                    | 6        |
| 2     | Placebo   | RVB20       | 1         | 0                 | 0                      | 0                                  | 0                           | 0                                           | 0                          | 0                          | 1                                    | 1        |

A study investigating the efficacy of BIOEC2015 in reducing the clinical signs associated with canine inflammatory bowel disease (IBD)

FINAL

---

|   |         |       |   |   |   |   |   |   |   |   |   |   |
|---|---------|-------|---|---|---|---|---|---|---|---|---|---|
| 2 | Placebo | RVB20 | 3 | 0 | 0 | 0 | 0 | 0 | 0 | 0 | 0 | 0 |
| 2 | Placebo | RVB28 | 1 | 0 | 0 | 1 | 0 | 0 | 0 | 0 | 0 | 1 |
| 2 | Placebo | RVB30 | 1 | 0 | 0 | 0 | 0 | 0 | 0 | 0 | 0 | 0 |
| 2 | Placebo | RVB31 | 1 | 0 | 0 | 1 | 0 | 0 | 0 | 0 | 0 | 1 |
| 2 | Placebo | RVB34 | 1 | 0 | 0 | 2 | 0 | 0 | 0 | 0 | 2 | 4 |
| 2 | Placebo | RVB34 | 3 | 0 | 1 | 1 | 0 | 1 | 0 | 1 | 0 | 4 |

TABLE A26. WSAVA scores – duodenum.

| Group | Treatment | Patient No. | Visit No. | Villous Stunting | Villous Epithelial Injury | Crypt Distension | Lacteal Dilation | Mucosal Fibrosis | Intraepithelial Lymphocytes | Lamiae Propria Lymphocytes and Plasma Cells | Lamiae Propria Eosinophils | Lamiae Propria Neutrophils | Subtotal |
|-------|-----------|-------------|-----------|------------------|---------------------------|------------------|------------------|------------------|-----------------------------|---------------------------------------------|----------------------------|----------------------------|----------|
| 1     | BIOEC2015 | RVB01       | 1         | 1                | 0                         | 0                | 0                | 0                | 0                           | 1                                           | 0                          | 0                          | 2        |
| 1     | BIOEC2015 | RVB01       | 3         | 1                | 0                         | 0                | 1                | 1                | 0                           | 1                                           | 0                          | 0                          | 4        |
| 1     | BIOEC2015 | RVB07       | 1         | 2                | 2                         | 2                | 2                | 0                | 1                           | 3                                           | 0                          | 0                          | 12       |
| 1     | BIOEC2015 | RVB08       | 1         | 1                | 0                         | 1                | 1                | 0                | 0                           | 1                                           | 0                          | 0                          | 4        |
| 1     | BIOEC2015 | RVB08       | 3         | 2                | 1                         | 1                | 0                | 1                | 0                           | 1                                           | 0                          | 0                          | 6        |
| 1     | BIOEC2015 | RVB13       | 1         | 1                | 0                         | 0                | 0                | 1                | 0                           | 2                                           | 1                          | 0                          | 5        |
| 1     | BIOEC2015 | RVB13       | 3         | 1                | 0                         | 1                | 0                | 0                | 0                           | 1                                           | 0                          | 0                          | 3        |
| 1     | BIOEC2015 | RVB16       | 1         | 2                | 0                         | 0                | 0                | 0                | 0                           | 2                                           | 0                          | 0                          | 4        |
| 1     | BIOEC2015 | RVB16       | 3         | 2                | 1                         | 1                | 0                | 0                | 0                           | 2                                           | 0                          | 0                          | 6        |
| 1     | BIOEC2015 | RVB18       | 1         | 1                | 0                         | 0                | 0                | 0                | 0                           | 2                                           | 1                          | 0                          | 4        |
| 1     | BIOEC2015 | RVB18       | 3         | 0                | 1                         | 0                | 0                | 0                | 0                           | 1                                           | 1                          | 0                          | 3        |
| 1     | BIOEC2015 | RVB27       | 1         | 1                | 0                         | 0                | 0                | 0                | 0                           | 1                                           | 0                          | 0                          | 2        |
| 1     | BIOEC2015 | RVB29       | 1         | 0                | 0                         | 0                | 0                | 0                | 0                           | 2                                           | 0                          | 0                          | 2        |
| 1     | BIOEC2015 | RVB32       | 1         | 1                | 0                         | 0                | 0                | 0                | 0                           | 1                                           | 1                          | 0                          | 3        |
| 1     | BIOEC2015 | RVB32       | 3         | 0                | 0                         | 0                | 0                | 0                | 0                           | 1                                           | 0                          | 0                          | 1        |
| 1     | BIOEC2015 | RVB35       | 1         | 2                | 1                         | 2                | 1                | 0                | 0                           | 3                                           | 0                          | 0                          | 9        |
| 1     | BIOEC2015 | RVB35       | 3         | 2                | 0                         | 0                | 0                | 0                | 0                           | 1                                           | 0                          | 0                          | 3        |
| 2     | Placebo   | RVB02       | 1         | 1                | 0                         | 0                | 1                | 0                | 0                           | 1                                           | 0                          | 0                          | 3        |
| 2     | Placebo   | RVB02       | 3         | 1                | 0                         | 0                | 0                | 0                | 0                           | 1                                           | 0                          | 0                          | 2        |
| 2     | Placebo   | RVB05       | 1         | 2                | 2                         | 1                | 2                | 1                | 0                           | 2                                           | 0                          | 0                          | 10       |
| 2     | Placebo   | RVB09       | 1         | 3                | 1                         | 2                | 1                | 1                | 0                           | 2                                           | 0                          | 0                          | 10       |
| 2     | Placebo   | RVB11       | 1         | 3                | 2                         | 1                | 0                | 0                | 1                           | 2                                           | 2                          | 0                          | 11       |
| 2     | Placebo   | RVB11       | 3         | 0                | 0                         | 0                | 0                | 0                | 0                           | 1                                           | 0                          | 0                          | 1        |
| 2     | Placebo   | RVB12       | 1         | 1                | 0                         | 0                | 0                | 0                | 0                           | 0                                           | 0                          | 0                          | 1        |
| 2     | Placebo   | RVB20       | 1         | 1                | 0                         | 0                | 1                | 0                | 0                           | 1                                           | 0                          | 0                          | 3        |
| 2     | Placebo   | RVB20       | 3         | 0                | 0                         | 0                | 0                | 0                | 0                           | 0                                           | 0                          | 0                          | 0        |
| 2     | Placebo   | RVB28       | 1         | 2                | 0                         | 0                | 0                | 0                | 1                           | 2                                           | 0                          | 0                          | 5        |

A study investigating the efficacy of BIOEC2015 in reducing the clinical signs associated with canine inflammatory bowel disease (IBD)

FINAL

---

|   |         |       |   |   |   |   |   |   |   |   |   |   |   |
|---|---------|-------|---|---|---|---|---|---|---|---|---|---|---|
| 2 | Placebo | RVB30 | 1 | 0 | 0 | 1 | 0 | 1 | 0 | 1 | 0 | 1 | 4 |
| 2 | Placebo | RVB31 | 1 | 1 | 0 | 0 | 1 | 0 | 0 | 2 | 0 | 0 | 4 |
| 2 | Placebo | RVB34 | 1 | 1 | 1 | 1 | 0 | 0 | 0 | 1 | 0 | 0 | 4 |
| 2 | Placebo | RVB34 | 3 | 1 | 0 | 0 | 0 | 0 | 0 | 1 | 0 | 0 | 2 |

TABLE A27. WSAVA score - ilium.

| Group | Treatment | Patient No. | Visit No. | Villous Stunting | Villous Epithelial Injury | Crypt Distension | Lacteal Dilation | Mucosal Fibrosis | Intraepithelial Lymphocytes | Lamia Propria Lymphocytes and Plasma Cells | Lamia Propria Eosinophils | Lamia Propria Neutrophils | Subtotal |
|-------|-----------|-------------|-----------|------------------|---------------------------|------------------|------------------|------------------|-----------------------------|--------------------------------------------|---------------------------|---------------------------|----------|
| 1     | BIOEC2015 | RVB01       | 1         |                  |                           |                  |                  |                  |                             |                                            |                           |                           |          |
| 1     | BIOEC2015 | RVB01       | 3         |                  |                           |                  |                  |                  |                             |                                            |                           |                           |          |
| 1     | BIOEC2015 | RVB07       | 1         | 0                | 0                         | 0                | 2                | 0                | 1                           | 2                                          | 0                         | 0                         | 5        |
| 1     | BIOEC2015 | RVB08       | 1         | 1                | 0                         | 0                | 1                | 0                | 0                           | 1                                          | 1                         | 0                         | 4        |
| 1     | BIOEC2015 | RVB08       | 3         |                  |                           |                  |                  |                  |                             |                                            |                           |                           |          |
| 1     | BIOEC2015 | RVB13       | 1         | 0                | 0                         | 0                | 0                | 0                | 0                           | 1                                          | 1                         | 0                         | 2        |
| 1     | BIOEC2015 | RVB13       | 3         | 0                | 0                         | 0                | 1                | 0                | 0                           | 2                                          | 0                         | 0                         | 3        |
| 1     | BIOEC2015 | RVB16       | 1         | 0                | 0                         | 0                | 0                | 0                | 1                           | 1                                          | 0                         | 1                         | 3        |
| 1     | BIOEC2015 | RVB16       | 3         | 0                | 0                         | 0                | 0                | 0                | 0                           | 0                                          | 0                         | 0                         | 0        |
| 1     | BIOEC2015 | RVB18       | 1         | 0                | 0                         | 0                | 1                | 0                | 0                           | 1                                          | 2                         | 0                         | 4        |
| 1     | BIOEC2015 | RVB18       | 3         | 0                | 0                         | 0                | 0                | 0                | 1                           | 1                                          | 0                         | 0                         | 2        |
| 1     | BIOEC2015 | RVB27       | 1         |                  |                           |                  |                  |                  |                             |                                            |                           |                           |          |
| 1     | BIOEC2015 | RVB29       | 1         |                  |                           |                  |                  |                  |                             |                                            |                           |                           |          |
| 1     | BIOEC2015 | RVB32       | 1         | 0                | 0                         | 0                | 0                | 0                | 0                           | 0                                          | 0                         | 0                         | 0        |
| 1     | BIOEC2015 | RVB32       | 3         |                  |                           |                  |                  |                  |                             |                                            |                           |                           |          |
| 1     | BIOEC2015 | RVB35       | 1         |                  |                           |                  |                  |                  |                             |                                            |                           |                           |          |
| 1     | BIOEC2015 | RVB35       | 3         |                  |                           |                  |                  |                  |                             |                                            |                           |                           |          |
| 2     | Placebo   | RVB02       | 1         | 0                | 0                         | 1                | 1                | 0                | 0                           | 1                                          | 0                         | 0                         | 3        |
| 2     | Placebo   | RVB02       | 3         | 0                | 0                         | 0                | 0                | 0                | 1                           | 0                                          | 0                         | 0                         | 1        |
| 2     | Placebo   | RVB05       | 1         | 1                | 0                         | 0                | 3                | 0                | 0                           | 1                                          | 0                         | 0                         | 5        |
| 2     | Placebo   | RVB09       | 1         | 2                | 0                         | 0                | 0                | 0                | 3                           | 3                                          | 0                         | 0                         | 8        |
| 2     | Placebo   | RVB11       | 1         | 1                | 0                         | 0                | 1                | 0                | 0                           | 1                                          | 1                         | 1                         | 5        |
| 2     | Placebo   | RVB11       | 3         | 0                | 0                         | 0                | 1                | 0                | 1                           | 1                                          | 1                         | 0                         | 4        |
| 2     | Placebo   | RVB12       | 1         | 0                | 0                         | 0                | 0                | 0                | 0                           | 1                                          | 1                         | 0                         | 2        |
| 2     | Placebo   | RVB20       | 1         | 0                | 0                         | 0                | 0                | 0                | 0                           | 0                                          | 1                         | 0                         | 1        |
| 2     | Placebo   | RVB20       | 3         |                  |                           |                  |                  |                  |                             |                                            |                           |                           |          |
| 2     | Placebo   | RVB28       | 1         |                  |                           |                  |                  |                  |                             |                                            |                           |                           |          |

A study investigating the efficacy of BIOEC2015 in reducing the clinical signs associated with canine inflammatory bowel disease (IBD)

FINAL



|   |         |       |   |   |   |   |   |   |   |   |   |   |   |
|---|---------|-------|---|---|---|---|---|---|---|---|---|---|---|
| 2 | Placebo | RVB30 | 1 |   |   |   |   |   |   |   |   |   |   |
| 2 | Placebo | RVB31 | 1 |   |   |   |   |   |   |   |   |   |   |
| 2 | Placebo | RVB34 | 1 |   |   |   |   |   |   |   |   |   |   |
| 2 | Placebo | RVB34 | 3 | 1 | 2 | 0 | 0 | 0 | 0 | 1 | 0 | 1 | 5 |

TABLE A28. WSAVA score – colon

| Group | Treatment | Patient No. | Visit No. | Surface Epithelial Injury | Crypt Hyperplasia | Crypt Dilatation and Distortion | Mucosal Fibrosis and Atrophy | Lamina Propria Lymphocytes and Plasma Cells | Lamina Propria Eosinophils | Lamina Propria Neutrophils | Lamina Propria Macrophages | SubTotal |
|-------|-----------|-------------|-----------|---------------------------|-------------------|---------------------------------|------------------------------|---------------------------------------------|----------------------------|----------------------------|----------------------------|----------|
| 1     | BIOEC2015 | RVB01       | 1         | 0                         | 0                 | 0                               | 0                            | 1                                           | 0                          | 0                          | 0                          | 1        |
| 1     | BIOEC2015 | RVB01       | 3         | 1                         | 1                 | 2                               | 1                            | 1                                           | 0                          | 0                          | 0                          | 6        |
| 1     | BIOEC2015 | RVB07       | 1         | 1                         | 1                 | 1                               | 0                            | 1                                           | 0                          | 0                          | 0                          | 4        |
| 1     | BIOEC2015 | RVB08       | 1         | 0                         | 1                 | 2                               | 1                            | 1                                           | 0                          | 0                          | 0                          | 5        |
| 1     | BIOEC2015 | RVB08       | 3         | 1                         | 1                 | 1                               | 1                            | 0                                           | 0                          | 0                          | 0                          | 4        |
| 1     | BIOEC2015 | RVB13       | 1         | 1                         | 0                 | 1                               | 1                            | 1                                           | 0                          | 0                          | 0                          | 4        |
| 1     | BIOEC2015 | RVB13       | 3         | 0                         | 0                 | 1                               | 1                            | 1                                           | 0                          | 0                          | 0                          | 3        |
| 1     | BIOEC2015 | RVB16       | 1         | 0                         | 1                 | 1                               | 1                            | 2                                           | 0                          | 0                          | 0                          | 5        |
| 1     | BIOEC2015 | RVB16       | 3         | 0                         | 0                 | 1                               | 1                            | 1                                           | 0                          | 0                          | 0                          | 3        |
| 1     | BIOEC2015 | RVB18       | 1         | 3                         | 0                 | 1                               | 1                            | 2                                           | 3                          | 1                          | 1                          | 12       |
| 1     | BIOEC2015 | RVB18       | 3         | 3                         | 1                 | 2                               | 2                            | 2                                           | 3                          | 1                          | 1                          | 15       |
| 1     | BIOEC2015 | RVB27       | 1         | 1                         | 0                 | 1                               | 1                            | 1                                           | 0                          | 0                          | 0                          | 4        |
| 1     | BIOEC2015 | RVB29       | 1         | 0                         | 0                 | 0                               | 1                            | 0                                           | 0                          | 0                          | 0                          | 1        |
| 1     | BIOEC2015 | RVB32       | 1         | 1                         | 1                 | 2                               | 1                            | 2                                           | 1                          | 0                          | 0                          | 8        |
| 1     | BIOEC2015 | RVB32       | 3         | 0                         | 1                 | 0                               | 0                            | 1                                           | 0                          | 0                          | 0                          | 2        |
| 1     | BIOEC2015 | RVB35       | 1         | 0                         | 0                 | 1                               | 0                            | 2                                           | 0                          | 0                          | 0                          | 3        |
| 1     | BIOEC2015 | RVB35       | 3         | 0                         | 0                 | 0                               | 0                            | 1                                           | 0                          | 0                          | 0                          | 1        |
| 2     | Placebo   | RVB02       | 1         | 1                         | 1                 | 1                               | 0                            | 2                                           | 1                          | 0                          | 0                          | 6        |
| 2     | Placebo   | RVB02       | 3         | 2                         | 1                 | 1                               | 1                            | 2                                           | 0                          | 1                          | 0                          | 8        |
| 2     | Placebo   | RVB05       | 1         | 1                         | 1                 | 1                               | 0                            | 1                                           | 0                          | 0                          | 0                          | 4        |
| 2     | Placebo   | RVB09       | 1         | 0                         | 0                 | 0                               | 0                            | 1                                           | 0                          | 0                          | 0                          | 1        |
| 2     | Placebo   | RVB11       | 1         | 0                         | 0                 | 1                               | 1                            | 1                                           | 0                          | 1                          | 0                          | 4        |
| 2     | Placebo   | RVB11       | 3         | 0                         | 0                 | 1                               | 0                            | 1                                           | 0                          | 0                          | 0                          | 2        |
| 2     | Placebo   | RVB12       | 1         | 1                         | 0                 | 1                               | 0                            | 1                                           | 0                          | 0                          | 0                          | 3        |
| 2     | Placebo   | RVB20       | 1         | 0                         | 0                 | 0                               | 0                            | 1                                           | 0                          | 0                          | 0                          | 1        |
| 2     | Placebo   | RVB20       | 3         | 1                         | 1                 | 1                               | 0                            | 2                                           | 0                          | 0                          | 0                          | 5        |
| 2     | Placebo   | RVB28       | 1         | 1                         | 1                 | 1                               | 1                            | 2                                           | 0                          | 0                          | 0                          | 6        |

A study investigating the efficacy of BIOEC2015 in reducing the clinical signs associated with canine inflammatory bowel disease (IBD)

FINAL

---

|   |         |       |   |   |   |   |   |   |   |   |   |   |
|---|---------|-------|---|---|---|---|---|---|---|---|---|---|
| 2 | Placebo | RVB30 | 1 | 0 | 0 | 1 | 1 | 1 | 0 | 0 | 0 | 3 |
| 2 | Placebo | RVB31 | 1 | 1 | 0 | 0 | 0 | 1 | 0 | 0 | 0 | 2 |
| 2 | Placebo | RVB34 | 1 | 1 | 0 | 0 | 1 | 1 | 0 | 0 | 0 | 3 |
| 2 | Placebo | RVB34 | 3 | 0 | 0 | 1 | 1 | 1 | 0 | 0 | 0 | 3 |

TABLE A29. UGI Part 1 Equipment used and sampling type.

| Group | Treatment | Patient No. | Visit No. | Endoscopes Used | Forceps Used                     | Problems/Complications | Sampling | Documentation |
|-------|-----------|-------------|-----------|-----------------|----------------------------------|------------------------|----------|---------------|
| 1     | BIOEC2015 | RVB01       | 1         | GIF-H260        | EndoJaw 1550m Model FB-230K      | None                   | biopsy   | None          |
| 1     | BIOEC2015 | RVB01       | 3         | GIF-H260        | EndoJaw 1550mm Model FB-230K     | None                   | biopsy   | Photo         |
| 1     | BIOEC2015 | RVB07       | 1         | GIFH260         | Disposable 1550mm 2.8mm          | None                   | biopsy   | Photo         |
| 1     | BIOEC2015 | RVB08       | 1         | CF H260 AL      | Endojaw FB-2300mm                | None                   | biopsy   | Video, photo  |
| 1     | BIOEC2015 | RVB08       | 3         | CF H260 AL      | EndoJaw FB-230U 2300mm           | None                   | biopsy   | Photo         |
| 1     | BIOEC2015 | RVB13       | 1         | CFH260 AL       | EndoJaw 2300mm                   | None                   | biopsy   | Photo         |
| 1     | BIOEC2015 | RVB13       | 3         | CFH260 AL       | FB-230U EndoJaw                  | None                   | biopsy   | Photo         |
| 1     | BIOEC2015 | RVB16       | 1         | GIF-H260        | EndoJaw FB-230K                  | None                   | biopsy   | Photo         |
| 1     | BIOEC2015 | RVB16       | 3         | CIF-H260 AL     | EndoJaw FB-230U                  | None                   | biopsy   | Photo         |
| 1     | BIOEC2015 | RVB18       | 1         | GIF-H260        | FB-230K EndoJaw                  | None                   | biopsy   | Photo         |
| 1     | BIOEC2015 | RVB18       | 3         | GIF-H260        | EndoJaw FB 230K                  | None                   | biopsy   | Photo         |
| 1     | BIOEC2015 | RVB27       | 1         | CFH260AL        | 2.8mm / 2300mm                   | None                   | biopsy   | Photo         |
| 1     | BIOEC2015 | RVB29       | 1         | CF-H260AL       | EndoJaw FB-230U Oval Fenestrated | None                   | biopsy   | Photo         |
| 1     | BIOEC2015 | RVB29       | 3         | CF-H260AL       | EndoJaw FB-230U Oval Fenestrated | None                   | biopsy   | Photo         |

A study investigating the efficacy of BIOEC2015 in reducing the clinical signs associated with canine inflammatory bowel disease (IBD)

FINAL

|   |           |       |   |                                |                                                             |                                            |        |                 |
|---|-----------|-------|---|--------------------------------|-------------------------------------------------------------|--------------------------------------------|--------|-----------------|
| 1 | BIOEC2015 | RVB32 | 1 | GIF H260                       | EndoJaw FB-230K Oval Fenestrated SwingJaw                   | None                                       | biopsy | Photo           |
| 1 | BIOEC2015 | RVB32 | 3 | CF-H260AL                      | EndoJaw FB230-U Oval Fenestrated Swing Jaw                  | None                                       | biopsy | Photo           |
| 1 | BIOEC2015 | RVB35 | 1 | Olympus CF-H260AL              | EndoJaw Oval Fenestrated SwingJaw FB-230U                   | None                                       | biopsy | Photo           |
| 1 | BIOEC2015 | RVB35 | 3 | CF-H260 AL                     | EndoJaw FB-230U                                             | None                                       | biopsy | Photo           |
| 2 | Placebo   | RVB02 | 1 | GIFXP6N                        | 1550mm 2.0mm Oval Fenestrated                               | None                                       | biopsy | None            |
| 2 | Placebo   | RVB02 | 3 | GIF-H260                       | 1550mm 2.8mm                                                | None                                       | biopsy | Photo           |
| 2 | Placebo   | RVB05 | 1 | GIF-H260                       | EndoJaw FB230K                                              | None                                       | biopsy | Photo           |
| 2 | Placebo   | RVB09 | 1 | CFH 260                        | Biopsy Forceps length 1550mm, channel size 2.8mm and 2300mm | None                                       | biopsy | Photo and video |
| 2 | Placebo   | RVB11 | 1 | CFH 260 AL                     | EndoJaw FB-230u                                             | Excessive Bleeding, Visualisation obscured | biopsy | Photo           |
| 2 | Placebo   | RVB11 | 3 | CFH260-AL                      | EndoJaw FB-230u                                             | None                                       | biopsy | Photo           |
| 2 | Placebo   | RVB12 | 1 | CFH260 AL 3.7mm Biopsy Channel | 2.8mm/2300mm biopsy forceps                                 | None                                       | biopsy | Photo           |
| 2 | Placebo   | RVB20 | 1 | CFH-260-AL                     | FB-230U EndoJaw                                             | None                                       | biopsy | None            |
| 2 | Placebo   | RVB20 | 3 | CFH 260AL                      | EndoJaw FB-230                                              | None                                       | biopsy | Photo           |
| 2 | Placebo   | RVB28 | 1 | 2049408                        | Oval fenestrated swing jaw                                  | None                                       | biopsy | Photo           |

A study investigating the efficacy of BIOEC2015 in reducing the clinical signs associated with canine inflammatory bowel disease (IBD)

FINAL

|   |         |       |   |                   |                                                   |      |        |       |
|---|---------|-------|---|-------------------|---------------------------------------------------|------|--------|-------|
|   |         |       |   |                   | 1550mm length/2.8mm channel size, model FB-230K   |      |        |       |
| 2 | Placebo | RVB30 | 1 | GIF-H260          | EndoJaw FB-230U Swing Jaw Oval Fenestrated        | None | biopsy | Photo |
| 2 | Placebo | RVB31 | 1 | GIF-H260          | EndoJaw FB-230U Swing Jaw Oval Fenestrated        | None | biopsy | Photo |
| 2 | Placebo | RVB31 | 3 | GIF-H260          | EndoJaw FB-230K Swing Jaw Oval Fenestrated        | None | biopsy | Photo |
| 2 | Placebo | RVB34 | 1 | Olympus CF-H260AL | Olympus EndoJaw Oval Fenestrated SwingJaw FB-230U | None | biopsy | Photo |
| 2 | Placebo | RVB34 | 3 | CF-H260AL         | EndoJaw FB-230U                                   | None | biopsy | Photo |

TABLE A30. UGI Part 1 oesophageal lesion code.

| Group | Treatment | Patient No. | Visit No. | Hyperaemia/Vascularity | Discolouration | Friability | Haemorrhage | Erosion/Ulcer | Contents (mucus/bile/food) | LES open /other lesions | Comments                                                                                      |
|-------|-----------|-------------|-----------|------------------------|----------------|------------|-------------|---------------|----------------------------|-------------------------|-----------------------------------------------------------------------------------------------|
| 1     | BIOEC2015 | RVB01       | 1         | 0                      | 0              | 0          | 0           | 0             | 0                          | 0                       |                                                                                               |
| 1     | BIOEC2015 | RVB01       | 3         | 0                      | 0              | 0          | 0           | 0             | 0                          | 0                       |                                                                                               |
| 1     | BIOEC2015 | RVB07       | 1         | 0                      | 0              | 0          | 0           | 0             | 0                          | 0                       |                                                                                               |
| 1     | BIOEC2015 | RVB08       | 1         | 0                      | 0              | 0          | 0           | 0             | 0                          | 0                       |                                                                                               |
| 1     | BIOEC2015 | RVB08       | 3         | 0                      | 0              | 0          | 0           | 0             | 0                          | 0                       |                                                                                               |
| 1     | BIOEC2015 | RVB13       | 1         | 0                      | 0              | 0          | 0           | 0             | 2                          | 0                       | Liquid in Oesophagus                                                                          |
| 1     | BIOEC2015 | RVB13       | 3         | 0                      | 0              | 0          | 0           | 0             | 0                          | 0                       |                                                                                               |
| 1     | BIOEC2015 | RVB16       | 1         | 0                      | 0              | 0          | 0           | 0             | 0                          | 0                       |                                                                                               |
| 1     | BIOEC2015 | RVB16       | 3         | 0                      | 0              | 0          | 0           | 0             | 0                          | 0                       |                                                                                               |
| 1     | BIOEC2015 | RVB18       | 1         | 0                      | 0              | 0          | 0           | 0             | 0                          | 0                       |                                                                                               |
| 1     | BIOEC2015 | RVB18       | 3         | 0                      | 0              | 0          | 0           | 0             | 0                          | 0                       |                                                                                               |
| 1     | BIOEC2015 | RVB27       | 1         | 0                      | 0              | 0          | 0           | 0             | 0                          | 0                       |                                                                                               |
| 1     | BIOEC2015 | RVB29       | 1         | 0                      | 0              | 0          | 0           | 0             | 0                          | 0                       |                                                                                               |
| 1     | BIOEC2015 | RVB29       | 3         | 0                      | 0              | 0          | 0           | 0             | 0                          | 0                       |                                                                                               |
| 1     | BIOEC2015 | RVB32       | 1         | 1                      | 0              | 0          | 0           | 0             | 0                          | 0                       | Mild hyperaemia in one focal area of mid oesophagus, not necessarily of clinical significance |
| 1     | BIOEC2015 | RVB32       | 3         | 0                      | 0              | 0          | 0           | 0             | 0                          | 0                       |                                                                                               |
| 1     | BIOEC2015 | RVB35       | 1         | 0                      | 0              | 0          | 0           | 0             | 0                          | 0                       |                                                                                               |
| 1     | BIOEC2015 | RVB35       | 3         | 0                      | 0              | 0          | 0           | 0             | 0                          | 0                       |                                                                                               |

A study investigating the efficacy of BIOEC2015 in reducing the clinical signs associated with canine inflammatory bowel disease (IBD)

FINAL

|   |         |       |   |   |   |   |   |   |   |   |  |
|---|---------|-------|---|---|---|---|---|---|---|---|--|
| 2 | Placebo | RVB02 | 1 | 0 | 0 | 0 | 0 | 0 | 1 | 0 |  |
| 2 | Placebo | RVB02 | 3 | 0 | 0 | 0 | 0 | 0 | 0 | 0 |  |
| 2 | Placebo | RVB05 | 1 | 0 | 0 | 0 | 0 | 0 | 0 | 0 |  |
| 2 | Placebo | RVB09 | 1 | 0 | 0 | 0 | 0 | 1 | 0 | 0 |  |
| 2 | Placebo | RVB11 | 1 | 0 | 0 | 0 | 0 | 0 | 0 | 0 |  |
| 2 | Placebo | RVB11 | 3 | 0 | 0 | 0 | 0 | 0 | 0 | 0 |  |
| 2 | Placebo | RVB12 | 1 | 0 | 0 | 0 | 0 | 0 | 0 | 0 |  |
| 2 | Placebo | RVB20 | 1 | 0 | 0 | 0 | 0 | 0 | 0 | 0 |  |
| 2 | Placebo | RVB20 | 3 | 0 | 0 | 0 | 0 | 0 | 0 | 0 |  |
| 2 | Placebo | RVB28 | 1 | 0 | 0 | 0 | 0 | 0 | 0 | 0 |  |
| 2 | Placebo | RVB30 | 1 | 0 | 0 | 0 | 0 | 0 | 0 | 0 |  |
| 2 | Placebo | RVB31 | 1 | 0 | 0 | 0 | 0 | 0 | 0 | 0 |  |
| 2 | Placebo | RVB31 | 3 | 0 | 0 | 0 | 0 | 0 | 0 | 0 |  |
| 2 | Placebo | RVB34 | 1 | 0 | 0 | 0 | 0 | 0 | 0 | 0 |  |
| 2 | Placebo | RVB34 | 3 | 0 | 0 | 0 | 0 | 0 | 0 | 0 |  |



TABLE A31. UGI part 1 Stomach lesion code.

| Group | Treatment | Patient No. | Visit No. | Can't inflate lumen | Hyperaemia/Vascularity | Oedema | Discolouration | Friability | haemorrhage | Erosion/Ulcer | Contents | Passing scope through pylorus | Comments                                                 |
|-------|-----------|-------------|-----------|---------------------|------------------------|--------|----------------|------------|-------------|---------------|----------|-------------------------------|----------------------------------------------------------|
| 1     | BIOEC2015 | RVB01       | 1         | 0                   | 0                      | 0      | 0              | 0          | 0           | 0             | 0        | 0                             |                                                          |
| 1     | BIOEC2015 | RVB01       | 3         | 0                   | 0                      | 0      | 0              | 1          | 0           | 0             | 0        | 0                             | mild friability                                          |
| 1     | BIOEC2015 | RVB07       | 1         | 0                   | 0                      | 0      | 0              | 0          | 0           | 0             | 0        | 0                             |                                                          |
| 1     | BIOEC2015 | RVB08       | 1         | 0                   | 0                      | 0      | 0              | 0          | 0           | 0             | 0        | 0                             |                                                          |
| 1     | BIOEC2015 | RVB08       | 3         | 0                   | 1                      | 0      | 0              | 0          | 0           | 0             | 0        | 0                             | mild generalised hyperaemia                              |
| 1     | BIOEC2015 | RVB13       | 1         | 0                   | 0                      | 0      | 1              | 0          | 0           | 1             | 0        | 0                             | Two small ulcers seen, one in fundus, one in body        |
| 1     | BIOEC2015 | RVB13       | 3         | 0                   | 0                      | 0      | 0              | 0          | 0           | 0             | 0        | 0                             |                                                          |
| 1     | BIOEC2015 | RVB16       | 1         | 0                   | 0                      | 0      | 1              | 0          | 0           | 0             | 0        | 0                             | Patchy hyperaemia vs pale, diffuse                       |
| 1     | BIOEC2015 | RVB16       | 3         | 0                   | 2                      | 0      | 1              | 0          | 0           | 0             | 0        | 0                             | Moderately hyperaemic: patchy distribution (discoloured) |
| 1     | BIOEC2015 | RVB18       | 1         | 0                   | 0                      | 0      | 0              | 0          | 0           | 0             | 0        | 0                             | Small protruding polyp in fundus only                    |
| 1     | BIOEC2015 | RVB18       | 3         | 0                   | 1                      | 0      | 0              | 0          | 0           | 0             | 0        | 0                             | diffusely erythematous                                   |
| 1     | BIOEC2015 | RVB27       | 1         | 0                   | 1                      | 0      | 1              | 0          | 0           | 0             | 0        | 0                             |                                                          |
| 1     | BIOEC2015 | RVB29       | 1         | 0                   | 0                      | 0      | 2              | 2          | 1           | 1             | 0        | 0                             | Ulcerated area in greater curvature                      |
| 1     | BIOEC2015 | RVB29       | 3         | 0                   | 0                      | 0      | 0              | 0          | 0           | 0             | 0        | 0                             |                                                          |
| 1     | BIOEC2015 | RVB32       | 1         | 0                   | 0                      | 0      | 0              | 0          | 0           | 0             | 0        | 0                             |                                                          |

|   |           |       |   |   |   |   |   |   |   |   |   |   |                                                              |
|---|-----------|-------|---|---|---|---|---|---|---|---|---|---|--------------------------------------------------------------|
| 1 | BIOEC2015 | RVB32 | 3 | 0 | 0 | 0 | 1 | 0 | 0 | 0 | 2 | 0 | Diffusely inflamed, no specific lesion. Liquid ++ in stomach |
| 1 | BIOEC2015 | RVB35 | 1 | 0 | 0 | 0 | 0 | 0 | 1 | 0 | 1 | 2 | Grass present                                                |
| 1 | BIOEC2015 | RVB35 | 3 | 0 | 0 | 0 | 0 | 0 | 0 | 0 | 0 | 0 |                                                              |
| 2 | Placebo   | RVB02 | 1 | 0 | 0 | 0 | 0 | 0 | 0 | 0 | 1 | 0 |                                                              |
| 2 | Placebo   | RVB02 | 3 | 0 | 0 | 0 | 0 | 0 | 0 | 0 | 0 | 0 |                                                              |
| 2 | Placebo   | RVB05 | 1 | 0 | 0 | 0 | 0 | 0 | 0 | 0 | 1 | 0 | small amount of bile and mucus in gastric lumen              |
| 2 | Placebo   | RVB09 | 1 | 0 | 0 | 0 | 0 | 0 | 0 | 0 | 0 | 0 |                                                              |
| 2 | Placebo   | RVB11 | 1 | 0 | 0 | 0 | 0 | 0 | 0 | 0 | 0 | 0 |                                                              |
| 2 | Placebo   | RVB11 | 3 | 0 | 0 | 0 | 0 | 0 | 0 | 0 | 0 | 0 |                                                              |
| 2 | Placebo   | RVB12 | 1 | 0 | 0 | 0 | 0 | 0 | 0 | 0 | 0 | 0 |                                                              |
| 2 | Placebo   | RVB20 | 1 | 0 | 0 | 0 | 0 | 0 | 0 | 0 | 0 | 0 |                                                              |
| 2 | Placebo   | RVB20 | 3 | 0 | 0 | 0 | 0 | 0 | 0 | 0 | 0 | 0 |                                                              |
| 2 | Placebo   | RVB28 | 1 | 0 | 1 | 0 | 0 | 2 | 0 | 0 | 0 | 0 |                                                              |
| 2 | Placebo   | RVB30 | 1 | 0 | 0 | 0 | 0 | 0 | 0 | 0 | 0 | 2 | Difficult to pass scope through pylorus                      |
| 2 | Placebo   | RVB31 | 1 | 0 | 0 | 0 | 0 | 0 | 0 | 0 | 0 | 0 | Pyloric sphincter slightly open                              |
| 2 | Placebo   | RVB31 | 3 | 0 | 0 | 0 | 0 | 0 | 0 | 0 | 0 | 0 |                                                              |
| 2 | Placebo   | RVB34 | 1 | 0 | 0 | 0 | 0 | 0 | 0 | 0 | 0 | 0 |                                                              |
| 2 | Placebo   | RVB34 | 3 | 0 | 0 | 0 | 0 | 0 | 0 | 0 | 0 | 0 |                                                              |

TABLE A32. UGI part 1- Duodenum lesion code.

| Group | Treatment | Patient No. | Visit No. | Can't inflate lumen | Hyperaemia/V asclarity | Oedema | Discolouration | Friability | Texture | Haemorrhage | Erosion/Ulcer | Lacteal dilation | Contents (mucus/ bile/ food) | Comments                                                                                                                             |
|-------|-----------|-------------|-----------|---------------------|------------------------|--------|----------------|------------|---------|-------------|---------------|------------------|------------------------------|--------------------------------------------------------------------------------------------------------------------------------------|
| 1     | BIOEC2015 | RVB01       | 1         | 0                   | 0                      | 0      | 0              | 0          | 0       | 1           | 0             | 0                | 1                            | bile                                                                                                                                 |
| 1     | BIOEC2015 | RVB01       | 3         | 0                   | 1                      | 1      | 0              | 1          | 0       | 0           | 0             | 0                | 1                            | mild changes                                                                                                                         |
| 1     | BIOEC2015 | RVB07       | 1         | 1                   | 2                      | 2      | 3              | 3          | 2       | 1           | 0             | 2                | 0                            |                                                                                                                                      |
| 1     | BIOEC2015 | RVB08       | 1         | 0                   | 1                      | 0      | 1              | 1          | 0       | 1           | 0             | 0                | 0                            |                                                                                                                                      |
| 1     | BIOEC2015 | RVB08       | 3         | 0                   | 1                      | 0      | 0              | 2          | 0       | 0           | 0             | 0                | 0                            | Mild hyperaemia but moderate diffuse friability. Making tunnels within the mucosa with the forceps                                   |
| 1     | BIOEC2015 | RVB13       | 1         | 0                   | 0                      | 2      | 0              | 3          | 2       | 2           | 0             | 0                | 0                            | Generalised inflammation                                                                                                             |
| 1     | BIOEC2015 | RVB13       | 3         | 0                   | 2                      | 1      | 2              | 0          | 1       | 0           | 0             | 2                | 0                            |                                                                                                                                      |
| 1     | BIOEC2015 | RVB16       | 1         | 0                   | 2                      | 1      | 2              | 2          | 2       | 1           | 0             | 0                | 0                            | Hyperaemic discolouration. Edematus with cobblestone appearance. Friable, resulting in haemorrhage, no haemorrhage prior to sampling |
| 1     | BIOEC2015 | RVB16       | 3         | 0                   | 2                      | 1      | 2              | 3          | 2       | 0           | 0             | 1                | 0                            | Duodenum very friable, discoloured with abnormal texture. Mild lacteal dilation.                                                     |
| 1     | BIOEC2015 | RVB18       | 1         | 0                   | 2                      | 1      | 1              | 1          | 1       | 0           | 0             | 0                | 0                            |                                                                                                                                      |
| 1     | BIOEC2015 | RVB18       | 3         | 0                   | 0                      | 0      | 0              | 0          | 0       | 0           | 0             | 0                | 0                            |                                                                                                                                      |
| 1     | BIOEC2015 | RVB27       | 1         | 0                   | 1                      | 2      | 1              | 2          | 2       | 0           | 0             | 0                | 1                            |                                                                                                                                      |

|   |           |       |   |   |   |   |   |   |   |   |   |   |   |                                                                                                     |
|---|-----------|-------|---|---|---|---|---|---|---|---|---|---|---|-----------------------------------------------------------------------------------------------------|
| 1 | BIOEC2015 | RVB29 | 1 | 0 | 2 | 1 | 2 | 2 | 1 | 0 | 0 | 1 | 0 |                                                                                                     |
| 1 | BIOEC2015 | RVB29 | 3 | 0 | 0 | 2 | 0 | 0 | 2 | 1 | 0 | 0 | 0 | Oedematous cobblestoned appearance of duodenum with multiple pinpoint haemorrhages on visible villi |
| 1 | BIOEC2015 | RVB32 | 1 | 0 | 1 | 0 | 0 | 0 | 0 | 0 | 0 | 0 | 0 | Generalised hyperaemia of whole region of duodenum examined                                         |
| 1 | BIOEC2015 | RVB32 | 3 | 0 | 0 | 1 | 0 | 1 | 1 | 1 | 0 | 0 | 1 | mucus                                                                                               |
| 1 | BIOEC2015 | RVB35 | 1 | 0 | 2 | 2 | 2 | 2 | 2 | 2 | 0 | 2 | 0 | Diffusely oedematous and inflamed. Lacteals very visible                                            |
| 1 | BIOEC2015 | RVB35 | 3 | 0 | 2 | 3 | 2 | 2 | 2 | 2 | 0 | 2 | 0 |                                                                                                     |
| 2 | Placebo   | RVB02 | 1 | 0 | 0 | 0 | 0 | 0 | 0 | 0 | 0 | 0 | 0 |                                                                                                     |
| 2 | Placebo   | RVB02 | 3 | 0 | 1 | 1 | 0 | 1 | 0 | 0 | 0 | 0 | 0 |                                                                                                     |
| 2 | Placebo   | RVB05 | 1 | 0 | 2 | 2 | 0 | 2 | 0 | 1 | 0 | 2 | 0 |                                                                                                     |
| 2 | Placebo   | RVB09 | 1 | 0 | 3 | 2 | 3 | 3 | 3 | 3 | 0 | 1 | 2 | a lot of bile                                                                                       |
| 2 | Placebo   | RVB11 | 1 | 1 | 2 | 1 | 2 | 2 | 1 | 3 | 0 | 0 | 0 | Cobblestone appearance in duodenum                                                                  |
| 2 | Placebo   | RVB11 | 3 | 0 | 1 | 0 | 1 | 1 | 0 | 0 | 0 | 0 | 0 | Frequent areas of inflammation                                                                      |
| 2 | Placebo   | RVB12 | 1 | 0 | 1 | 1 | 0 | 0 | 1 | 0 | 0 | 0 | 0 | mild hyperaemia, mild oedema, mild cobblestone appearance                                           |
| 2 | Placebo   | RVB20 | 1 | 0 | 0 | 0 | 0 | 0 | 0 | 0 | 0 | 0 | 0 |                                                                                                     |
| 2 | Placebo   | RVB20 | 3 | 0 | 0 | 0 | 0 | 0 | 0 | 0 | 0 | 0 | 0 |                                                                                                     |
| 2 | Placebo   | RVB28 | 1 | 0 | 1 | 1 | 1 | 1 | 0 | 0 | 0 | 0 | 0 |                                                                                                     |

A study investigating the efficacy of BIOEC2015 in reducing the clinical signs associated with canine inflammatory bowel disease (IBD)

FINAL

|   |         |       |   |   |   |   |   |   |   |   |   |   |   |                                                      |
|---|---------|-------|---|---|---|---|---|---|---|---|---|---|---|------------------------------------------------------|
| 2 | Placebo | RVB30 | 1 | 0 | 0 | 0 | 0 | 0 | 0 | 0 | 0 | 1 | 0 |                                                      |
| 2 | Placebo | RVB31 | 1 | 0 | 0 | 1 | 0 | 0 | 2 | 0 | 0 | 0 | 0 | Able to see villi very well. Cobblestone appearance. |
| 2 | Placebo | RVB31 | 3 | 0 | 0 | 0 | 0 | 0 | 0 | 0 | 0 | 0 | 0 |                                                      |
| 2 | Placebo | RVB34 | 1 | 0 | 2 | 2 | 1 | 3 | 2 | 0 | 0 | 0 | 1 |                                                      |
| 2 | Placebo | RVB34 | 3 | 0 | 1 | 1 | 1 | 0 | 1 | 1 | 0 | 0 | 0 |                                                      |

TABLE A33. UGI part 2 stomach lesion code.

| Group | Treatment | Patient No. | Visit No. | Stomach | Site of Lesion                          | Site of Biopsies                        | Can't inflate | Hyperemia/Va | Edema | Discolouration | Friability | haemorrhage | Erosion/Ulcer | Contents | Passing scope | Comments                                                 |
|-------|-----------|-------------|-----------|---------|-----------------------------------------|-----------------------------------------|---------------|--------------|-------|----------------|------------|-------------|---------------|----------|---------------|----------------------------------------------------------|
| 1     | BIOEC2015 | RVB01       | 1         | Normal  |                                         |                                         | 0             | 0            | 0     | 0              | 0          | 0           | 0             | 0        | 0             |                                                          |
| 1     | BIOEC2015 | RVB01       | 3         | Normal  |                                         |                                         | 0             | 0            | 0     | 0              | 1          | 0           | 0             | 0        | 0             | mild friability                                          |
| 1     | BIOEC2015 | RVB07       | 1         | Normal  |                                         | Body, Antrum                            | 0             | 0            | 0     | 0              | 0          | 0           | 0             | 0        | 0             |                                                          |
| 1     | BIOEC2015 | RVB08       | 1         | Normal  |                                         | Fundus, Incisura, Pylorus               | 0             | 0            | 0     | 0              | 0          | 0           | 0             | 0        | 0             |                                                          |
| 1     | BIOEC2015 | RVB08       | 3         | Lesion  |                                         |                                         | 0             | 1            | 0     | 0              | 0          | 0           | 0             | 0        | 0             | mild generalised hyperemia                               |
| 1     | BIOEC2015 | RVB13       | 1         | Lesion  | Fundus, body                            | Fundus, Body, Incisura, Antrum, Pylorus | 0             | 0            | 0     | 1              | 0          | 0           | 1             | 0        | 0             | Two small ulcers seen, one in fundus, one in body        |
| 1     | BIOEC2015 | RVB13       | 3         | Normal  |                                         | Fundus, Incisura, Antrum                | 0             | 0            | 0     | 0              | 0          | 0           | 0             | 0        | 0             |                                                          |
| 1     | BIOEC2015 | RVB16       | 1         | Lesion  | Fundus, Body, Incisura, Antrum, Pylorus | Fundus, Body, Incisura, Antrum, Pylorus | 0             | 0            | 0     | 1              | 0          | 0           | 0             | 0        | 0             | Patchy hyperaemia vs pale, diffuse                       |
| 1     | BIOEC2015 | RVB16       | 3         | Lesion  | Fundus, body                            | Fundus, Body, Incisura, Pylorus         | 0             | 2            | 0     | 1              | 0          | 0           | 0             | 0        | 0             | Moderately hyperaemic: patchy distribution (discoloured) |

|   |               |           |   |            |        |                                            |   |   |   |   |   |   |   |   |   |   |   |                                                                          |
|---|---------------|-----------|---|------------|--------|--------------------------------------------|---|---|---|---|---|---|---|---|---|---|---|--------------------------------------------------------------------------|
| 1 | BIOEC20<br>15 | RVB<br>18 | 1 | Lesio<br>n | Fundus | Fundus, Body, Incisura,<br>Antrum, Pylorus | 0 | 0 | 0 | 0 | 0 | 0 | 0 | 0 | 0 | 0 | 0 | Small<br>protruding<br>polyp in<br>fundus only                           |
| 1 | BIOEC20<br>15 | RVB<br>18 | 3 | Lesio<br>n | Body   | Fundus, Body, Incisura, Pylorus            | 0 | 1 | 0 | 0 | 0 | 0 | 0 | 0 | 0 | 0 | 0 | diffusely<br>erythematous                                                |
| 1 | BIOEC20<br>15 | RVB<br>27 | 1 | Lesio<br>n |        | Fundus, Body, Incisura,<br>Antrum, Pylorus | 0 | 1 | 0 | 1 | 0 | 0 | 0 | 0 | 0 | 0 | 0 |                                                                          |
| 1 | BIOEC20<br>15 | RVB<br>29 | 1 | Lesio<br>n | Body   | Fundus, Body, Incisura, Antrum             | 0 | 0 | 0 | 2 | 2 | 1 | 1 | 0 | 0 | 0 | 0 | Ulcerated area<br>in greater<br>curvature                                |
| 1 | BIOEC20<br>15 | RVB<br>29 | 3 | Norm<br>al |        |                                            | 0 | 0 | 0 | 0 | 0 | 0 | 0 | 0 | 0 | 0 | 0 |                                                                          |
| 1 | BIOEC20<br>15 | RVB<br>32 | 1 | Norm<br>al |        | Body, Pylorus                              | 0 | 0 | 0 | 0 | 0 | 0 | 0 | 0 | 0 | 0 | 0 |                                                                          |
| 1 | BIOEC20<br>15 | RVB<br>32 | 3 | Lesio<br>n |        |                                            | 0 | 0 | 0 | 1 | 0 | 0 | 0 | 0 | 2 | 0 | 0 | Diffusely<br>inflamed, no<br>specific lesion.<br>Liquid ++ in<br>stomach |
| 1 | BIOEC20<br>15 | RVB<br>35 | 1 | Lesio<br>n |        | Fundus, Incisura, Antrum,<br>Pylorus       | 0 | 0 | 0 | 0 | 0 | 1 | 0 | 1 | 2 | 0 | 0 | Grass present                                                            |
| 1 | BIOEC20<br>15 | RVB<br>35 | 3 | Norm<br>al |        | Body, Incisura, Antrum, Pylorus            | 0 | 0 | 0 | 0 | 0 | 0 | 0 | 0 | 0 | 0 | 0 |                                                                          |
| 2 | Placebo       | RVB<br>02 | 1 | Norm<br>al |        | Fundus, Antrum, Pylorus                    | 0 | 0 | 0 | 0 | 0 | 0 | 0 | 0 | 1 | 0 | 0 |                                                                          |
| 2 | Placebo       | RVB<br>02 | 3 | Norm<br>al |        |                                            | 0 | 0 | 0 | 0 | 0 | 0 | 0 | 0 | 0 | 0 | 0 |                                                                          |
| 2 | Placebo       | RVB<br>05 | 1 | Lesio<br>n |        | Fundus, Body, Incisura, Pylorus            | 0 | 0 | 0 | 0 | 0 | 0 | 0 | 0 | 1 | 0 | 0 | small amount<br>of bile and<br>mucus in<br>gastric lumen                 |
| 2 | Placebo       | RVB<br>09 | 1 | Norm<br>al |        | Fundus, Antrum, Pylorus                    | 0 | 0 | 0 | 0 | 0 | 0 | 0 | 0 | 0 | 0 | 0 |                                                                          |
| 2 | Placebo       | RVB<br>11 | 1 | Norm<br>al |        | Fundus, Body, Pylorus                      | 0 | 0 | 0 | 0 | 0 | 0 | 0 | 0 | 0 | 0 | 0 |                                                                          |

A study investigating the efficacy of BIOEC2015 in reducing the clinical signs associated with canine inflammatory bowel disease (IBD)

FINAL

|   |         |        |   |        |                                        |                                         |   |   |   |   |   |   |   |   |   |   |                                         |
|---|---------|--------|---|--------|----------------------------------------|-----------------------------------------|---|---|---|---|---|---|---|---|---|---|-----------------------------------------|
| 2 | Placebo | RVB 11 | 3 | Normal |                                        | Fundus, Body, Incisura, Antrum          | 0 | 0 | 0 | 0 | 0 | 0 | 0 | 0 | 0 | 0 |                                         |
| 2 | Placebo | RVB 12 | 1 | Normal |                                        | Fundus, Body, Incisura, Antrum, Pylorus | 0 | 0 | 0 | 0 | 0 | 0 | 0 | 0 | 0 | 0 |                                         |
| 2 | Placebo | RVB 20 | 1 | Normal |                                        | Fundus, Incisura, Antrum                | 0 | 0 | 0 | 0 | 0 | 0 | 0 | 0 | 0 | 0 |                                         |
| 2 | Placebo | RVB 20 | 3 | Normal |                                        | Fundus, Body, Incisura, Antrum          | 0 | 0 | 0 | 0 | 0 | 0 | 0 | 0 | 0 | 0 |                                         |
| 2 | Placebo | RVB 28 | 1 | Lesion | Fundus, Body, Incisura Antrum, Pylorus | Fundus, Pylorus                         | 0 | 1 | 0 | 0 | 2 | 0 | 0 | 0 | 0 | 0 |                                         |
| 2 | Placebo | RVB 30 | 1 | Lesion |                                        | Body, Incisura, Antrum, Pylorus         | 0 | 0 | 0 | 0 | 0 | 0 | 0 | 0 | 0 | 2 | Difficult to pass scope through pylorus |
| 2 | Placebo | RVB 31 | 1 | Normal |                                        | Fundus, Pylorus                         | 0 | 0 | 0 | 0 | 0 | 0 | 0 | 0 | 0 | 0 | Pyloric sphincter slightly open         |
| 2 | Placebo | RVB 31 | 3 | Normal |                                        |                                         | 0 | 0 | 0 | 0 | 0 | 0 | 0 | 0 | 0 | 0 |                                         |
| 2 | Placebo | RVB 34 | 1 | Normal |                                        | Fundus, Body, Incisura, Pylorus         | 0 | 0 | 0 | 0 | 0 | 0 | 0 | 0 | 0 | 0 |                                         |
| 2 | Placebo | RVB 34 | 3 | Normal |                                        |                                         | 0 | 0 | 0 | 0 | 0 | 0 | 0 | 0 | 0 | 0 |                                         |



TABLE A34. UGI part 2 Duodenum lesion code.

| Group | Treatment | Patient No. | Visit No. | Duodenum /Jejunum | Distance tip of scope advanced | Papilla seen? | Can't inflate lumen | Hyperemia/Vascularity | Edema | Discolouration | Friability | Texture | Haemorrhage | Erosion/Ulcer | Lacteal dilation | Contents | Comments                                                                                                                            |
|-------|-----------|-------------|-----------|-------------------|--------------------------------|---------------|---------------------|-----------------------|-------|----------------|------------|---------|-------------|---------------|------------------|----------|-------------------------------------------------------------------------------------------------------------------------------------|
| 1     | BIOEC2015 | RVB01       | 1         | Normal            | 120                            | Yes           | 0                   | 0                     | 0     | 0              | 0          | 0       | 1           | 0             | 0                | 1        | bile                                                                                                                                |
| 1     | BIOEC2015 | RVB01       | 3         | Normal            | 100                            | No            | 0                   | 1                     | 1     | 0              | 1          | 0       | 0           | 0             | 0                | 1        | mild changes                                                                                                                        |
| 1     | BIOEC2015 | RVB07       | 1         | Lesion            | 40                             | Yes           | 1                   | 2                     | 2     | 3              | 3          | 2       | 1           | 0             | 2                | 0        |                                                                                                                                     |
| 1     | BIOEC2015 | RVB08       | 1         | Lesion            | unknown                        | Yes           | 0                   | 1                     | 0     | 1              | 1          | 0       | 1           | 0             | 0                | 0        |                                                                                                                                     |
| 1     | BIOEC2015 | RVB08       | 3         | Lesion            | 120                            | Yes           | 0                   | 1                     | 0     | 0              | 2          | 0       | 0           | 0             | 0                | 0        | Mild hyperemia but moderate diffuse friability. Making tunnels within the mucosa with the forceps                                   |
| 1     | BIOEC2015 | RVB13       | 1         | Lesion            | 120                            | No            | 0                   | 0                     | 2     | 0              | 3          | 2       | 2           | 0             | 0                | 0        | Generalised inflammation                                                                                                            |
| 1     | BIOEC2015 | RVB13       | 3         | Lesion            | 150                            | Yes           | 0                   | 2                     | 1     | 2              | 0          | 1       | 0           | 0             | 2                | 0        |                                                                                                                                     |
| 1     | BIOEC2015 | RVB16       | 1         | Lesion            | 100                            | Yes           | 0                   | 2                     | 1     | 2              | 2          | 2       | 1           | 0             | 0                | 0        | Hyperaemic discolouration. Edematus with cobblestone appearance. Friable resulting in haemorrhage, no haemorrhage prior to sampling |

|   |           |       |   |        |     |     |   |   |   |   |   |   |   |   |   |   |                                                                                                     |
|---|-----------|-------|---|--------|-----|-----|---|---|---|---|---|---|---|---|---|---|-----------------------------------------------------------------------------------------------------|
| 1 | BIOEC2015 | RVB16 | 3 | Lesion | 100 | No  | 0 | 2 | 1 | 2 | 3 | 2 | 0 | 0 | 1 | 0 | Duodenum very friable, discoloured with abnormal texture. Mild lacteal dilation.                    |
| 1 | BIOEC2015 | RVB18 | 1 | Lesion | 100 | Yes | 0 | 2 | 1 | 1 | 1 | 1 | 0 | 0 | 0 | 0 |                                                                                                     |
| 1 | BIOEC2015 | RVB18 | 3 | Normal | 90  | Yes | 0 | 0 | 0 | 0 | 0 | 0 | 0 | 0 | 0 | 0 |                                                                                                     |
| 1 | BIOEC2015 | RVB27 | 1 | Lesion | 90  | No  | 0 | 1 | 2 | 1 | 2 | 2 | 0 | 0 | 0 | 1 |                                                                                                     |
| 1 | BIOEC2015 | RVB29 | 1 | Lesion | 130 | No  | 0 | 2 | 1 | 2 | 2 | 1 | 0 | 0 | 1 | 0 |                                                                                                     |
| 1 | BIOEC2015 | RVB29 | 3 | Lesion | 130 | Yes | 0 | 0 | 2 | 0 | 0 | 2 | 1 | 0 | 0 | 0 | Oedematous cobblestoned appearance of duodenum with multiple pinpoint haemorrhages on visible villi |
| 1 | BIOEC2015 | RVB32 | 1 | Lesion | 103 | No  | 0 | 1 | 0 | 0 | 0 | 0 | 0 | 0 | 0 | 0 | Generalised hyperemia of whole region of duodenum examined                                          |
| 1 | BIOEC2015 | RVB32 | 3 | Lesion | 130 | No  | 0 | 0 | 1 | 0 | 1 | 1 | 1 | 0 | 0 | 1 | mucus                                                                                               |
| 1 | BIOEC2015 | RVB35 | 1 | Lesion | 100 | No  | 0 | 2 | 2 | 2 | 2 | 2 | 2 | 0 | 2 | 0 | Diffusely oedematous and inflamed. Lacteals very visible                                            |
| 1 | BIOEC2015 | RVB35 | 3 | Lesion | 140 | No  | 0 | 2 | 3 | 2 | 2 | 2 | 2 | 0 | 2 | 0 |                                                                                                     |
| 2 | Placebo   | RVB02 | 1 | Normal | 80  | No  | 0 | 0 | 0 | 0 | 0 | 0 | 0 | 0 | 0 | 0 |                                                                                                     |
| 2 | Placebo   | RVB02 | 3 | Lesion | 80  | No  | 0 | 1 | 1 | 0 | 1 | 0 | 0 | 0 | 0 | 0 |                                                                                                     |
| 2 | Placebo   | RVB05 | 1 | Lesion | 100 | No  | 0 | 2 | 2 | 0 | 2 | 0 | 1 | 0 | 2 | 0 |                                                                                                     |
| 2 | Placebo   | RVB09 | 1 | Lesion | 60  | No  | 0 | 3 | 2 | 3 | 3 | 3 | 3 | 0 | 1 | 2 | a lot of bile                                                                                       |
| 2 | Placebo   | RVB11 | 1 | Lesion | 140 | No  | 1 | 2 | 1 | 2 | 2 | 1 | 3 | 0 | 0 | 0 | Cobblestone appearance in duodenum                                                                  |

|   |         |       |   |        |     |     |   |   |   |   |   |   |   |   |   |   |   |                                                           |
|---|---------|-------|---|--------|-----|-----|---|---|---|---|---|---|---|---|---|---|---|-----------------------------------------------------------|
| 2 | Placebo | RVB11 | 3 | Lesion | 110 | No  | 0 | 1 | 0 | 1 | 1 | 0 | 0 | 0 | 0 | 0 | 0 | Frequent areas of inflammation                            |
| 2 | Placebo | RVB12 | 1 | Lesion | 100 | No  | 0 | 1 | 1 | 0 | 0 | 1 | 0 | 0 | 0 | 0 | 0 | mild hyperaemia, mild oedema, mild cobblestone appearance |
| 2 | Placebo | RVB20 | 1 | Normal | 130 | Yes | 0 | 0 | 0 | 0 | 0 | 0 | 0 | 0 | 0 | 0 | 0 |                                                           |
| 2 | Placebo | RVB20 | 3 | Normal | 130 | Yes | 0 | 0 | 0 | 0 | 0 | 0 | 0 | 0 | 0 | 0 | 0 |                                                           |
| 2 | Placebo | RVB28 | 1 | Lesion |     | Yes | 0 | 1 | 1 | 1 | 1 | 0 | 0 | 0 | 0 | 0 | 0 |                                                           |
| 2 | Placebo | RVB30 | 1 | Lesion | 103 | No  | 0 | 0 | 0 | 0 | 0 | 0 | 0 | 0 | 0 | 1 | 0 |                                                           |
| 2 | Placebo | RVB31 | 1 | Lesion | 90  | Yes | 0 | 0 | 1 | 0 | 0 | 2 | 0 | 0 | 0 | 0 | 0 | Able to see villi very well. Cobblestone appearance.      |
| 2 | Placebo | RVB31 | 3 | Normal | 100 | No  | 0 | 0 | 0 | 0 | 0 | 0 | 0 | 0 | 0 | 0 | 0 |                                                           |
| 2 | Placebo | RVB34 | 1 | Lesion | 130 | No  | 0 | 2 | 2 | 1 | 3 | 2 | 0 | 0 | 0 | 0 | 1 |                                                           |
| 2 | Placebo | RVB34 | 3 | Lesion | 135 | No  | 0 | 1 | 1 | 1 | 0 | 1 | 1 | 0 | 0 | 0 | 0 |                                                           |

TABLE A35. LGI part 1 equipment and sampling.

| Group | Treatment | Patient No. | Visit No. | Endoscope Used        | Forceps Used                            | Method of colon preparation                                | Colon Prep Adequate? | Problems/Complications                                 | Reason unable to complete full examination | Reason unable to obtain adequate biopsies | Reason visualisation obscured | Sampling | Documentation |
|-------|-----------|-------------|-----------|-----------------------|-----------------------------------------|------------------------------------------------------------|----------------------|--------------------------------------------------------|--------------------------------------------|-------------------------------------------|-------------------------------|----------|---------------|
| 1     | BIOEC2015 | RVB01       | 1         | GIF-H260              | EndoJaw 1550mm Model FB230K             | warm water enema and kleen prep                            | Yes                  | None                                                   |                                            |                                           |                               | Biopsy   | None          |
| 1     | BIOEC2015 | RVB01       | 3         | GIF-H260              | EndoJaw 1550mm Model FB230K             | warm water enema and kleen prep                            | Yes                  | None                                                   |                                            |                                           |                               | Biopsy   | Photo         |
| 1     | BIOEC2015 | RVB07       | 1         | GIFH260               | 1550mm 2.8mm                            | Enema, Warm water enema 02 Dec 15 and kleen prep 01 dec 15 | Yes                  | None                                                   |                                            |                                           |                               | Biopsy   | Video, photo  |
| 1     | BIOEC2015 | RVB08       | 1         | CF H260 AL            | Endojaw FB 2300mm                       | golytely enema                                             | Yes                  | None                                                   |                                            |                                           |                               | Biopsy   | Video, photo  |
| 1     | BIOEC2015 | RVB08       | 3         | CF H260 AL + GIF-H260 | Endojaw FB-230U 2300mm + FB-230K 1550mm | Kleen prep, fletchers enema, warm water enema              | Yes                  | None                                                   |                                            |                                           |                               | Biopsy   | Photo         |
| 1     | BIOEC2015 | RVB13       | 1         | CFH260AL              | EndoJaw 2300mm                          | Kleen prep/ fletchers enema/warm water enema               | Yes                  | Excessive bleeding, Unable to obtain adequate biopsies |                                            | Fell out of ileum                         |                               | Biopsy   | Photo         |

A study investigating the efficacy of BIOEC2015 in reducing the clinical signs associated with canine inflammatory bowel disease (IBD)

FINAL

|   |           |       |   |                       |                                  |                                                          |     |                                                                         |                                |                   |                 |        |       |
|---|-----------|-------|---|-----------------------|----------------------------------|----------------------------------------------------------|-----|-------------------------------------------------------------------------|--------------------------------|-------------------|-----------------|--------|-------|
| 1 | BIOEC2015 | RVB13 | 3 | CFH260AL              | FB230u EndoJaw                   | Kleen Prep, Fletchers enema, warm water enema x 2        | No  | None                                                                    |                                |                   |                 | Biopsy | Photo |
| 1 | BIOEC2015 | RVB16 | 1 | GIF-H260              | EndoJaw FB - 230K                | Warm water enema, fletchers enema, kleen prep            | Yes | None                                                                    |                                |                   |                 | Biopsy | None  |
| 1 | BIOEC2015 | RVB16 | 3 | GIF H260              | EndoJaw FB-230U                  | Kleen Prep, enema                                        | No  | Visualisation obscured                                                  |                                |                   | Inadequate prep | Biopsy | Photo |
| 1 | BIOEC2015 | RVB18 | 1 | GIF - H260            | FB-230K EndoJaw                  | Kleen prep, warm water enema, fletchers enema            | Yes | None                                                                    |                                |                   |                 | Biopsy | None  |
| 1 | BIOEC2015 | RVB18 | 3 | GIF XP260N + GIF-H260 | FB-230U EndoJaw                  | Kleen Prep x 2 Warm water enema x 2 Fletcher's enema     | No  | None                                                                    |                                |                   |                 | Biopsy | None  |
| 1 | BIOEC2015 | RVB27 | 1 | CFH260AL              | 2.8mm/2300mm                     | 2 x warm water flush                                     | No  | Unable to complete full examination                                     | inability to enter ileum       |                   |                 | Biopsy | Photo |
| 1 | BIOEC2015 | RVB29 | 1 | CF-H260AL             | EndoJaw FB-230U Oval Fenestrated | Kleen Prep x 2, warm water enema x1, fletchers enema x 1 | Yes | Unable to complete full examination, Unable to obtain adequate biopsies | Not possible to intubate ileum | No ileal biopsies |                 | Biopsy | Photo |

|   |           |       |   |                   |                                            |                                                    |     |                                                                         |                                            |                                            |                 |        |       |
|---|-----------|-------|---|-------------------|--------------------------------------------|----------------------------------------------------|-----|-------------------------------------------------------------------------|--------------------------------------------|--------------------------------------------|-----------------|--------|-------|
| 1 | BIOEC2015 | RVB29 | 3 | CF-H260AL         | EndoJaw FB-230U Oval Fenestrated           | Warm water enema x 3                               | Yes | Unable to complete full examination, Unable to obtain adequate biopsies | unable to enter ileum                      | blind biopsies not taken                   |                 | Biopsy | Photo |
| 1 | BIOEC2015 | RVB32 | 1 | GIF H260          | EndoJaw FB-230k Swing Jaw Oval Fenestrated | Clean prep, warm water enema x 1, fletcher's enema | No  | Unable to complete full examination, Unable to obtain adequate biopsies | unable to advance through ileo-colic valve | unable to advance through ileo-colic valve |                 | Biopsy | Photo |
| 1 | BIOEC2015 | RVB32 | 3 | CF-H260AL         | EndoJaw FB-230U Oval Fenestrated Swing Jaw | Warm water enema x 2                               | Yes | Unable to complete full examination, Unable to obtain adequate biopsies | could not get into ileum                   | could not get into ileum                   |                 | Biopsy | Photo |
| 1 | BIOEC2015 | RVB35 | 1 | Olympus CF-H260AL | EndoJaw Oval Fenestrated SwingJaw FB-230U  | Warm water enema x 3                               | Yes | None                                                                    |                                            |                                            |                 | Biopsy | Photo |
| 1 | BIOEC2015 | RVB35 | 3 | CF-H260AL         | EndoJaw FB-230U                            | Warm water enema under GA                          | No  | Visualisation obscured                                                  |                                            |                                            | Faecal material | Biopsy | Photo |
| 2 | Placebo   | RVB02 | 1 | GIFXP6N           | 1550mm 2.8mm Oval Fenestrated              | warm water enema and kleen prep                    | Yes | Visualisation obscured                                                  |                                            |                                            | Faecal matter   | Biopsy | None  |

|   |         |       |   |                               |                             |                                                                       |     |                                    |  |                                                                                                    |               |        |       |
|---|---------|-------|---|-------------------------------|-----------------------------|-----------------------------------------------------------------------|-----|------------------------------------|--|----------------------------------------------------------------------------------------------------|---------------|--------|-------|
| 2 | Placebo | RVB02 | 3 | GIF-H260                      | 1550mm 2.8mm                | warm water enema and kleen prep orally                                | No  | None                               |  |                                                                                                    |               | Biopsy | Photo |
| 2 | Placebo | RVB05 | 1 | GIF-H260                      | EndoJaw FB230K              | Enemas, warm water and kleen prep                                     | No  |                                    |  |                                                                                                    |               | Biopsy | Photo |
| 2 | Placebo | RVB09 | 1 | CFH 260                       | 1550mm 2.8mm                | Kleen prep 26 Jan 16, 2 x enemas 27 Jan 16 (water)                    | Yes | None                               |  |                                                                                                    |               | Biopsy | Photo |
| 2 | Placebo | RVB11 | 1 | CF-H260AL                     | EndoJaw FB-230u             | Clean prep and warm water enemas                                      | Yes | None                               |  |                                                                                                    |               | Biopsy | None  |
| 2 | Placebo | RVB11 | 3 | CFH260-AL                     | EndoJaw FB-230U             | Kleen Prep and warm water enema                                       | Yes | None                               |  |                                                                                                    |               | Biopsy | None  |
| 2 | Placebo | RVB12 | 1 | CFH260AL 3.7mm Biopsy Channel | 2.8mm/2300mm biopsy forceps | Warm water enema and clean prep 10 Mar 16, Warm water enema 11 Mar 16 | Yes | Unable to obtain adequate biopsies |  | All biopsies required were not collected as the scope came out of the ileum and could no re-enter. |               | Biopsy | Photo |
| 2 | Placebo | RVB20 | 1 | GIF-H260                      | FB-230U EndoJaw             | Kleen prep, fletchers and warm water enemas                           | No  | None                               |  |                                                                                                    |               | Biopsy | Photo |
| 2 | Placebo | RVB20 | 3 | CFH 260 AL                    | EndoJaw FB-230U             | Warm water enemas,                                                    | No  | Visualisation obscured             |  |                                                                                                    | Faecal Matter | Biopsy | Photo |

|   |         |       |   |          |                                            |                                                                  |     |                                                                                                 |                                        |                                        |               |        |       |
|---|---------|-------|---|----------|--------------------------------------------|------------------------------------------------------------------|-----|-------------------------------------------------------------------------------------------------|----------------------------------------|----------------------------------------|---------------|--------|-------|
|   |         |       |   |          |                                            | clean prep, fletchers enema                                      |     |                                                                                                 |                                        |                                        |               |        |       |
| 2 | Placebo | RVB28 | 1 | 2049408  | FB230-K swing jaw                          | clean prep, warm prep x 2                                        | Yes | None                                                                                            |                                        |                                        |               | Biopsy | Photo |
| 2 | Placebo | RVB30 | 1 | GIF-H260 | EndoJaw FB-230U Oval Fenestrated SwingJaw  | 1 x fletchers enema, 2 x warm water enema, clean prep, lactulose | Yes | Unable to complete full examination, Unable to obtain adequate biopsies                         | Could not pass through ileocolic valve | Could not pass through ileocolic valve |               | Biopsy | Photo |
| 2 | Placebo | RVB31 | 1 | GIF-H260 | EndoJaw FB-230U Swing Jaw Oval Fenestrated | Clean prep, warm water enema x 2, fletchers enema                | No  | Unable to complete full examination, Unable to obtain adequate biopsies, Visualisation obscured | unable to enter ileum                  | unable to biopsy ileum                 | faecal matter | Biopsy | Photo |
| 2 | Placebo | RVB31 | 3 | GIF-H260 | EndoJaw FB-230k Swing Jaw Oval Fenestrated | 1 X warm water enema                                             | Yes | Unable to complete full examination, Unable to obtain adequate biopsies                         | could not access ileum                 | could not biopsy ileum                 |               | Biopsy | Photo |



|   |         |       |   |                    |                                                   |                                                   |     |                                            |  |  |          |        |       |
|---|---------|-------|---|--------------------|---------------------------------------------------|---------------------------------------------------|-----|--------------------------------------------|--|--|----------|--------|-------|
| 2 | Placebo | RVB34 | 1 | Olympus CF-H260 AL | Olympus EndoJaw Oval Fenestrated SwingJaw FB-230U | Warm water enema                                  | Yes | None                                       |  |  |          | Biopsy | Photo |
| 2 | Placebo | RVB34 | 3 | CF-H260AL          | EndoJaw FB-230U                                   | Kleen Prep x 2, Fletchers Enema, Warm water enema | Yes | Excessive bleeding, Visualisation obscured |  |  | bleeding | Biopsy | Photo |

TABLE A36. LGI part 1.

| Group | Treatment | Patient No. | Visit No. | Colon  | Visualised ileo-colic valve? | Visualised ceco-colic valve | Colon - Distance scope advanced (cm) | Hyperaemia/Vascularity | Discolouration | Friability/Haemorrhage | Erosion/Ulcer | Intussusception | Mass | Stricture | Artefact | Foreign body | Other | Comments                                         |
|-------|-----------|-------------|-----------|--------|------------------------------|-----------------------------|--------------------------------------|------------------------|----------------|------------------------|---------------|-----------------|------|-----------|----------|--------------|-------|--------------------------------------------------|
| 1     | BIOEC2015 | RVB01       | 1         | Normal | Yes                          | Yes                         |                                      | 1                      | 0              | 0                      | 0             | 0               | 0    | 0         | 0        | 0            | 0     |                                                  |
| 1     | BIOEC2015 | RVB01       | 3         | Normal | Yes                          | Yes                         | 90                                   | 0                      | 0              | 0                      | 0             | 0               | 0    | 0         | 0        | 0            | 0     |                                                  |
| 1     | BIOEC2015 | RVB07       | 1         | Normal | Yes                          | Yes                         |                                      | 0                      | 0              | 0                      | 0             | 0               | 0    | 0         | 0        | 0            |       |                                                  |
| 1     | BIOEC2015 | RVB08       | 1         | Lesion | Yes                          | Yes                         |                                      | 0                      | 0              | 0                      | 0             | 0               | 0    | 0         | 0        | 0            | 1     | lymphoid follicles seen in descending duodenum   |
| 1     | BIOEC2015 | RVB08       | 3         | Normal | Yes                          | Yes                         |                                      | 0                      | 0              | 0                      | 0             | 0               | 0    | 0         | 0        | 0            | 0     |                                                  |
| 1     | BIOEC2015 | RVB13       | 1         | Lesion | Yes                          | Yes                         |                                      | 0                      | 0              | 1                      | 0             | 0               | 0    | 0         | 0        | 0            | 0     |                                                  |
| 1     | BIOEC2015 | RVB13       | 3         | Normal | Yes                          | Yes                         |                                      | 0                      | 0              | 0                      | 0             | 0               | 0    | 0         | 0        | 0            | 0     |                                                  |
| 1     | BIOEC2015 | RVB16       | 1         | Normal | Yes                          | Yes                         |                                      | 0                      | 0              | 0                      | 0             | 0               | 0    | 0         | 0        | 0            | 0     |                                                  |
| 1     | BIOEC2015 | RVB16       | 3         | Lesion | Yes                          | Yes                         |                                      | 1                      | 1              | 1                      | 0             | 0               | 0    | 0         | 0        | 0            | 0     | Patchy discolouration and friable along entirety |
| 1     | BIOEC2015 | RVB18       | 1         | Normal | Yes                          | Yes                         |                                      | 0                      | 0              | 0                      | 0             | 0               | 0    | 0         | 0        | 0            | 0     |                                                  |
| 1     | BIOEC2015 | RVB18       | 3         | Normal | Yes                          | Yes                         |                                      | 0                      | 0              | 0                      | 0             | 0               | 0    | 0         | 0        | 0            | 0     |                                                  |
| 1     | BIOEC2015 | RVB27       | 1         | Normal | Yes                          | Yes                         | 100                                  | 0                      | 0              | 0                      | 0             | 0               | 0    | 0         | 0        | 0            | 0     |                                                  |
| 1     | BIOEC2015 | RVB29       | 1         | Normal | Yes                          | Yes                         | 80                                   | 0                      | 0              | 0                      | 0             | 0               | 0    | 0         | 0        | 0            | 0     |                                                  |
| 1     | BIOEC2015 | RVB29       | 3         | Normal | Yes                          | Yes                         | 70                                   | 0                      | 0              | 0                      | 0             | 0               | 0    | 0         | 0        | 0            | 0     |                                                  |
| 1     | BIOEC2015 | RVB32       | 1         | Normal | Yes                          | Yes                         |                                      | 0                      | 0              | 0                      | 0             | 0               | 0    | 0         | 0        | 0            | 0     |                                                  |

A study investigating the efficacy of BIOEC2015 in reducing the clinical signs associated with canine inflammatory bowel disease (IBD)

FINAL

|   |           |       |   |        |     |     |     |   |   |   |   |   |   |   |   |   |   |                                 |
|---|-----------|-------|---|--------|-----|-----|-----|---|---|---|---|---|---|---|---|---|---|---------------------------------|
| 1 | BIOEC2015 | RVB32 | 3 | Lesion | Yes | Yes | 70  | 0 | 0 | 1 | 0 | 0 | 0 | 0 | 0 | 0 | 0 |                                 |
| 1 | BIOEC2015 | RVB35 | 1 | Lesion | Yes | Yes | 30  | 2 | 2 | 2 | 0 | 0 | 0 | 0 | 0 | 0 | 2 | Swelling of mucosa after biopsy |
| 1 | BIOEC2015 | RVB35 | 3 | Normal | Yes | Yes | 160 | 0 | 0 | 0 | 0 | 0 | 0 | 0 | 0 | 0 | 0 |                                 |
| 2 | Placebo   | RVB02 | 1 | Normal | Yes | Yes |     | 0 | 0 | 0 | 0 | 0 | 0 | 0 | 0 | 0 | 0 |                                 |
| 2 | Placebo   | RVB02 | 3 | Normal | Yes | Yes |     | 0 | 0 | 0 | 0 | 0 | 0 | 0 | 0 | 0 | 0 |                                 |
| 2 | Placebo   | RVB05 | 1 | Normal | Yes | Yes |     | 0 | 0 | 0 | 0 | 0 | 0 | 0 | 0 | 0 | 0 |                                 |
| 2 | Placebo   | RVB09 | 1 | Lesion | Yes | Yes |     | 0 | 0 | 1 | 0 | 0 | 0 | 0 | 0 | 0 | 0 |                                 |
| 2 | Placebo   | RVB11 | 1 | Lesion | Yes | Yes | 120 | 0 | 0 | 1 | 0 | 0 | 0 | 0 | 0 | 0 | 0 |                                 |
| 2 | Placebo   | RVB11 | 3 | Normal | Yes | No  |     | 0 | 0 | 0 | 0 | 0 | 0 | 0 | 0 | 0 | 0 |                                 |
| 2 | Placebo   | RVB12 | 1 | Normal | Yes | Yes |     | 0 | 0 | 0 | 0 | 0 | 0 | 0 | 0 | 0 | 0 |                                 |
| 2 | Placebo   | RVB20 | 1 | Normal | Yes | Yes |     | 0 | 0 | 0 | 0 | 0 | 0 | 0 | 0 | 0 | 0 |                                 |
| 2 | Placebo   | RVB20 | 3 | Normal | Yes | Yes |     | 0 | 0 | 0 | 0 | 0 | 0 | 0 | 0 | 0 | 0 |                                 |
| 2 | Placebo   | RVB28 | 1 | Normal | Yes | Yes | 45  | 0 | 0 | 0 | 0 | 0 | 0 | 0 | 0 | 0 | 0 |                                 |
| 2 | Placebo   | RVB30 | 1 | Lesion | Yes | Yes | 50  | 0 | 0 | 1 | 0 | 0 | 0 | 0 | 0 | 0 | 0 |                                 |
| 2 | Placebo   | RVB31 | 1 | Normal | Yes | Yes | 50  | 0 | 0 | 0 | 0 | 0 | 0 | 0 | 0 | 0 | 0 |                                 |
| 2 | Placebo   | RVB31 | 3 | Normal | Yes | Yes | 40  | 0 | 0 | 0 | 0 | 0 | 0 | 0 | 0 | 0 | 0 |                                 |
| 2 | Placebo   | RVB34 | 1 | Lesion | Yes | Yes | 70  | 3 | 1 | 2 | 1 | 0 | 0 | 0 | 0 | 0 | 0 |                                 |
| 2 | Placebo   | RVB34 | 3 | Lesion | Yes | Yes |     | 0 | 0 | 1 | 0 | 0 | 0 | 0 | 0 | 0 | 0 |                                 |

TABLE A37. LGI Part 2.

| Group | Treatment | Patient No. | Visit No. | Ileum Examined? | Passed scope through ileocolic valve? | Ileum - Biopsy taken? | Ileum - Biopsy taken by?                        | Ileum  | Can't inflate lumen | Hyperaemia/Vascularity | Oedema | Discolouration | Friability/Haemorrhage | Erosion/Ulcer | Lacteal dilation | Texture Of Mucosa | Mass | Other | Comments                             |  |
|-------|-----------|-------------|-----------|-----------------|---------------------------------------|-----------------------|-------------------------------------------------|--------|---------------------|------------------------|--------|----------------|------------------------|---------------|------------------|-------------------|------|-------|--------------------------------------|--|
| 1     | BIOEC2015 | RVB01       | 1         | Yes             | Yes                                   | Yes                   | Direct Visualisation                            | Normal | 2                   | 1                      | 0      | 0              | 0                      | 0             | 0                | 0                 | 0    | 0     |                                      |  |
| 1     | BIOEC2015 | RVB01       | 3         | No              | No                                    | Yes                   | Blindly passing forceps through ileocolic valve |        |                     |                        |        |                |                        |               |                  |                   |      |       |                                      |  |
| 1     | BIOEC2015 | RVB07       | 1         | Yes             | Yes                                   | Yes                   | Direct Visualisation                            | Lesion | 0                   | 2                      | 3      | 3              | 3                      | 0             | 3                | 3                 | 0    | 0     |                                      |  |
| 1     | BIOEC2015 | RVB08       | 1         | Yes             | Yes                                   | Yes                   | Direct Visualisation                            | Lesion | 2                   | 2                      | 1      | 1              | 0                      | 0             | 1                | 0                 | 0    | 0     |                                      |  |
| 1     | BIOEC2015 | RVB08       | 3         | No              | No                                    | No                    |                                                 |        |                     |                        |        |                |                        |               |                  |                   |      |       |                                      |  |
| 1     | BIOEC2015 | RVB13       | 1         | Yes             | Yes                                   | Yes                   | Direct Visualisation                            | Lesion | 0                   | 0                      | 0      | 0              | 3                      | 0             | 0                | 1                 | 0    | 0     | Excessive haemorrhage                |  |
| 1     | BIOEC2015 | RVB13       | 3         | Yes             | Yes                                   | Yes                   | Direct Visualisation                            | Normal | 0                   | 0                      | 0      | 0              | 0                      | 0             | 0                | 0                 | 0    | 0     |                                      |  |
| 1     | BIOEC2015 | RVB16       | 1         | Yes             | Yes                                   | Yes                   | Direct Visualisation                            | Lesion | 0                   | 2                      | 2      | 2              | 2                      | 0             | 0                | 2                 | 0    | 0     |                                      |  |
| 1     | BIOEC2015 | RVB16       | 3         | Yes             | Yes                                   | Yes                   | Direct Visualisation                            | Lesion | 0                   | 1                      | 0      | 1              | 1                      | 0             | 0                | 0                 | 0    | 0     | Patchy discolouration and friability |  |
| 1     | BIOEC2015 | RVB18       | 1         | Yes             | Yes                                   | Yes                   | Direct Visualisation                            | Lesion | 0                   | 1                      | 2      | 1              | 1                      | 0             | 0                | 2                 | 0    | 0     |                                      |  |

|   |           |       |   |     |     |     |                                                 |        |   |   |   |   |   |   |   |   |   |   |                                                                                    |
|---|-----------|-------|---|-----|-----|-----|-------------------------------------------------|--------|---|---|---|---|---|---|---|---|---|---|------------------------------------------------------------------------------------|
| 1 | BIOEC2015 | RVB18 | 3 | No  | No  | Yes | Blindly passing forceps through ileocolic valve |        |   |   |   |   |   |   |   |   |   |   |                                                                                    |
| 1 | BIOEC2015 | RVB27 | 1 | No  | No  | No  |                                                 |        |   |   |   |   |   |   |   |   |   |   |                                                                                    |
| 1 | BIOEC2015 | RVB29 | 1 | No  | No  | No  |                                                 |        |   |   |   |   |   |   |   |   |   |   |                                                                                    |
| 1 | BIOEC2015 | RVB29 | 3 | No  | No  | No  |                                                 |        |   |   |   |   |   |   |   |   |   |   |                                                                                    |
| 1 | BIOEC2015 | RVB32 | 1 | No  | No  | No  |                                                 |        |   |   |   |   |   |   |   |   |   |   |                                                                                    |
| 1 | BIOEC2015 | RVB32 | 3 | No  | No  | No  |                                                 |        |   |   |   |   |   |   |   |   |   |   |                                                                                    |
| 1 | BIOEC2015 | RVB35 | 1 | No  | No  | No  |                                                 |        |   |   |   |   |   |   |   |   |   |   |                                                                                    |
| 1 | BIOEC2015 | RVB35 | 3 | No  |     |     |                                                 |        |   |   |   |   |   |   |   |   |   |   |                                                                                    |
| 2 | Placebo   | RVB02 | 1 | Yes | Yes | Yes | Direct Visualisation                            | Normal | 0 | 0 | 0 | 0 | 1 | 0 | 0 | 0 | 0 |   |                                                                                    |
| 2 | Placebo   | RVB02 | 3 | Yes | Yes | Yes | Direct Visualisation                            | Normal | 0 | 0 | 0 | 0 | 0 | 0 | 0 | 0 | 0 | 0 | 0                                                                                  |
| 2 | Placebo   | RVB05 | 1 | Yes | Yes | Yes | Direct Visualisation                            |        |   |   |   |   |   |   |   |   |   |   |                                                                                    |
| 2 | Placebo   | RVB09 | 1 | Yes | Yes | Yes | Direct Visualisation                            | Lesion | 0 | 2 | 0 | 3 | 3 | 0 | 0 | 3 | 0 | 0 |                                                                                    |
| 2 | Placebo   | RVB11 | 1 | Yes | Yes | Yes | Direct Visualisation                            | Lesion | 0 | 2 | 1 | 2 | 3 | 0 | 0 | 3 | 0 | 0 | Cobblestone appearance                                                             |
| 2 | Placebo   | RVB11 | 3 | Yes | Yes | Yes | Direct Visualisation                            | Lesion | 0 | 0 | 1 | 0 | 2 | 0 | 0 | 1 | 0 | 0 |                                                                                    |
| 2 | Placebo   | RVB12 | 1 | Yes | Yes | Yes | Direct Visualisation                            | Lesion | 0 | 0 | 1 | 0 | 1 | 0 | 0 | 0 | 0 | 0 | Mild oedema. Mild haemorrhage on obtaining biopsies consistent with friable mucosa |
| 2 | Placebo   | RVB20 | 1 | Yes | Yes | Yes | Direct Visualisation                            | Normal | 0 | 0 | 0 | 0 | 0 | 0 | 0 | 0 | 0 | 0 |                                                                                    |

A study investigating the efficacy of BIOEC2015 in reducing the clinical signs associated with canine inflammatory bowel disease (IBD)

|   |         |           |   |     |     |     |                      |        |   |   |   |   |   |   |   |   |   |   |
|---|---------|-----------|---|-----|-----|-----|----------------------|--------|---|---|---|---|---|---|---|---|---|---|
| 2 | Placebo | RVB<br>20 | 3 | No  |     |     |                      |        |   |   |   |   |   |   |   |   |   |   |
| 2 | Placebo | RVB<br>28 | 1 | Yes | Yes | Yes | Direct Visualisation | Normal | 0 | 0 | 0 | 0 | 0 | 0 | 0 | 0 | 0 |   |
| 2 | Placebo | RVB<br>30 | 1 | No  | No  | No  |                      |        |   |   |   |   |   |   |   |   |   |   |
| 2 | Placebo | RVB<br>31 | 1 | No  | No  | No  |                      |        |   |   |   |   |   |   |   |   |   |   |
| 2 | Placebo | RVB<br>31 | 3 | No  | No  | No  |                      |        |   |   |   |   |   |   |   |   |   |   |
| 2 | Placebo | RVB<br>34 | 1 | No  | No  | No  |                      |        |   |   |   |   |   |   |   |   |   |   |
| 2 | Placebo | RVB<br>34 | 3 | Yes | Yes | Yes | Direct Visualisation | Lesion | 1 | 1 | 1 | 1 | 3 | 0 | 0 | 2 | 0 | 0 |

TABLE A38. LGI part 2 cecum

| Group | Treatment | Patient No. | Visit No. | Cecum - Examined? | Cecum - intubated? | Cecum - Normal? |
|-------|-----------|-------------|-----------|-------------------|--------------------|-----------------|
| 1     | BIOEC2015 | RVB01       | 1         | Yes               | yes                | yes             |
| 1     | BIOEC2015 | RVB01       | 3         | Yes               | yes                | yes             |
| 1     | BIOEC2015 | RVB07       | 1         | Yes               | yes                | yes             |
| 1     | BIOEC2015 | RVB08       | 1         | Yes               | yes                | yes             |
| 1     | BIOEC2015 | RVB08       | 3         | Yes               | yes                | yes             |
| 1     | BIOEC2015 | RVB13       | 1         | Yes               | yes                | yes             |
| 1     | BIOEC2015 | RVB13       | 3         | Yes               | yes                | yes             |
| 1     | BIOEC2015 | RVB16       | 1         | No                |                    |                 |
| 1     | BIOEC2015 | RVB16       | 3         | Yes               | yes                | yes             |
| 1     | BIOEC2015 | RVB18       | 1         | No                |                    |                 |
| 1     | BIOEC2015 | RVB18       | 3         | No                |                    |                 |
| 1     | BIOEC2015 | RVB27       | 1         | Yes               | yes                | yes             |
| 1     | BIOEC2015 | RVB29       | 1         | No                |                    |                 |
| 1     | BIOEC2015 | RVB29       | 3         | No                |                    |                 |
| 1     | BIOEC2015 | RVB32       | 1         | Yes               | yes                | yes             |
| 1     | BIOEC2015 | RVB32       | 3         | Yes               | yes                | yes             |
| 1     | BIOEC2015 | RVB35       | 1         | No                |                    |                 |
| 1     | BIOEC2015 | RVB35       | 3         | Yes               | yes                | yes             |
| 2     | Placebo   | RVB02       | 1         | No                |                    |                 |
| 2     | Placebo   | RVB02       | 3         | Yes               | yes                | yes             |
| 2     | Placebo   | RVB05       | 1         |                   |                    |                 |
| 2     | Placebo   | RVB09       | 1         | Yes               | yes                | yes             |
| 2     | Placebo   | RVB11       | 1         | Yes               | yes                | yes             |
| 2     | Placebo   | RVB11       | 3         | No                |                    |                 |
| 2     | Placebo   | RVB12       | 1         | Yes               | yes                | yes             |
| 2     | Placebo   | RVB20       | 1         | Yes               | yes                | yes             |
| 2     | Placebo   | RVB20       | 3         | Yes               | yes                | yes             |
| 2     | Placebo   | RVB28       | 1         | Yes               | yes                | yes             |
| 2     | Placebo   | RVB30       | 1         | Yes               | yes                | yes             |

A study investigating the efficacy of BIOEC2015 in reducing the clinical signs associated with canine inflammatory bowel disease (IBD)

FINAL

|   |         |       |   |    |  |  |
|---|---------|-------|---|----|--|--|
| 2 | Placebo | RVB31 | 1 | No |  |  |
| 2 | Placebo | RVB31 | 3 | No |  |  |
| 2 | Placebo | RVB34 | 1 | No |  |  |
| 2 | Placebo | RVB34 | 3 | No |  |  |



TABLE A39. Deviations.

| Patient No. | Visit No. | Deviation date | Deviation                                                                                                                                                                                                                                                                                                     | Action/Impact                                                                                                      |
|-------------|-----------|----------------|---------------------------------------------------------------------------------------------------------------------------------------------------------------------------------------------------------------------------------------------------------------------------------------------------------------|--------------------------------------------------------------------------------------------------------------------|
| RVB02       | 1         | 16-Oct-15      | Poor visibility in colon due to faecal matter and bleeding. Not all biopsies required were collected.                                                                                                                                                                                                         | Will only be able to process duodenal samples for this dog.                                                        |
| RVB03       | 1         | 03-Nov-15      | Faeces not stored in RVC Canine IBD archive in error.                                                                                                                                                                                                                                                         | Action taken: N/A. Dog was not included in trial as he didn't eat the prescription diet.                           |
| RVB02       | 3         | 07-Jan-16      | Only a small amount of urine could be collected, so there was not enough to be able to store any. Max was walked out many times before endoscopy but no urine was passed. Bladder was too small for cystocentesis.                                                                                            | No impact on study.                                                                                                |
| RVB05       | 1         | 19-Nov-15      | Form 10 lower GI page 2 - details were not completed for ileum and Cecum as Oliver Garden took samples for the study (ASPA licenced procedure) and did not complete the data at the time of the scope. James Swann (who performed the rest of the procedure) was unable to complete this section of the form. | Patient has been withdrawn from the study so no action taken. No impact on study.                                  |
| RVB09       | 1         | 27-Jan-16      | Dog seen 1 week ago and assessed as suitable for trial. Client had to think about decision to sign up for trial. Clinically exactly the same as 1 week ago, therefore test results from 1 week ago taken as results for 1st visit.                                                                            | Tests not repeated. Taken results from one week ago.                                                               |
| RVB09       | N/A       | 18-Feb-16      | Visit 2 conducted on the wrong date 18Feb16. Patient had only been on the study drug for 1 week, not two. Blood and faeces collected and paperwork completed as unscheduled visit.                                                                                                                            | Visit 2 appointment made for 24Feb16. Action: Incorrect visit 2 recorded as unscheduled visit. No impact on study. |
| RVB11       | 1         | 04-Feb-16      | Only one "plain" biopsy from the duodenum and one "snap frozen" biopsy sample from the duodenum were collected due to difficulty obtaining the samples.                                                                                                                                                       | No impact on study.                                                                                                |
| RVB02       | 7         | 02-Mar-16      | Only enough urine could be collected for analysis. Multiple attempts were made to collect urine to store. Unfortunately they were unsuccessful.                                                                                                                                                               | No impact on study.                                                                                                |
| RVB01       | 7         | 02-Mar-16      | No urine collected for analysis or storage. Multiple attempts were made but unfortunately they were unsuccessful.                                                                                                                                                                                             | No impact on study.                                                                                                |

|       |            |           |                                                                                                                                                                                                                                                                                                                                                             |                                                                                                                                                                                                                                   |
|-------|------------|-----------|-------------------------------------------------------------------------------------------------------------------------------------------------------------------------------------------------------------------------------------------------------------------------------------------------------------------------------------------------------------|-----------------------------------------------------------------------------------------------------------------------------------------------------------------------------------------------------------------------------------|
| RVB05 | withdrawal | 02-Dec-15 | Dog was removed from study because of deterioration. Dog did not come to see us at that time. Dog received 5 doses of compound / placebo with last dose given on 01Dec15. Dog started receiving steroids and cyclosporine on 05Dec15, which was ongoing at the time of visiting us on 21Dec15.                                                              | 1) Withdrawal form has now been completed. 2) Data collected at visit on 21Dec15 cannot be used for the study.                                                                                                                    |
| N/A   | N/A        | 23-Mar-16 | An old version of form 11 was used in error for hospital visits conducted between 15Dec15 and 22Mar16.                                                                                                                                                                                                                                                      | All forms have now been replaced. No impact on study as only formatting changes.                                                                                                                                                  |
| RVB12 | 2          | 30-Mar-16 | Owners did not bring in a faecal sample with them at visit 2 and a faecal swab was not taken in error. Owner brought in a faecal sample on 03Apr16 which has been processed and stored.                                                                                                                                                                     | Owners reminded again that a faecal sample will need to be collected for each hospital visit. CIC nurses understand that a faecal swab should be taken if a faecal sample is not collected. No substantial impact on study.       |
| RVB12 | 2          | 30-Mar-16 | Royal veterinary College Pathology laboratory sent the blood sample taken for albumin at Visit 2 away to an external laboratory for analysis. This is because their lab machine was broken. The sample was sent to "Powell Torrance Diagnostic Services".                                                                                                   | None. Albumin results received. No substantive impact on study.                                                                                                                                                                   |
| RVB09 | 3          | 19-Apr-16 | As patient was withdrawn from study due to worsening of clinical signs, weight loss and needs to be started on immunomodulatory medication. All of visit 3 was not completed as the patient did not have an endoscopy, therefore no biopsy samples could be collected. Forms 11 page 2, 9, 10 could not be completed. No urine could be collected.          | Dog withdrawn from study - no further sampling to occur. No impact on remainder of study, other than absence of data from this animal.                                                                                            |
| RVB11 | 1          | 04-Feb-16 | Giardia sp detected in faeces on initial screening tests                                                                                                                                                                                                                                                                                                    | Giardiasis is a known cause of diarrhoea in certain dogs and would confound the interpretation of any response to the diet and active product / placebo. The data from this case may have to be excluded from the final analysis. |
| RVB14 | 1          | 10-Jun-16 | Snap frozen tissue biopsies were not collected from the ileum due to difficulty obtaining samples. Biopsies were also not collected for cell culture from all three areas (duodenum, ileum and colon) for this patient due to time constraints on the day of the endoscopy. Oliver Garden was informed about this on the morning of the endoscopy by email. | None. No impact on overall study, though clearly no data from these areas of GIT.                                                                                                                                                 |
| RVB11 | 7          | 16-Jun-16 | Visit 7 - Only 2ml of serum gel collected instead of 3ml due to difficulty obtaining sample                                                                                                                                                                                                                                                                 | None. No impact, sufficient volume for assays.                                                                                                                                                                                    |

|              |         |                                         |                                                                                                                                                                                                                                                                                                                                                                                                                                                                                   |                                                                                                                                                                                                         |
|--------------|---------|-----------------------------------------|-----------------------------------------------------------------------------------------------------------------------------------------------------------------------------------------------------------------------------------------------------------------------------------------------------------------------------------------------------------------------------------------------------------------------------------------------------------------------------------|---------------------------------------------------------------------------------------------------------------------------------------------------------------------------------------------------------|
| RVB13        | 1       | 08-Jun-16                               | Unable to collect a voided faecal sample from RVB13, a faecal swab was collected instead.                                                                                                                                                                                                                                                                                                                                                                                         | This study sample will not be available for inclusion, with minimal or no impact on the whole study.                                                                                                    |
| RVB12        | 3       | 25-May-16                               | Patient withdrawn from study due to worsening of clinical signs of IBD, part way through visit 3. Therefore, endoscopy was not performed and therefore no samples collected or stored for the study and for the IBD archive. Urine and faeces not collected and so urinalysis not submitted. No urine or faeces samples were stored for the study or IBD archive. Also, there was insufficient blood for the lab to perform a folate test, so there are no results for this test. | None - results missing for samples not submitted at this visit. Unable to take any further action. Impact statement: A complete dataset will not be available for this dog - i.e. only partial dataset. |
| RVB12        | 2 and 3 | visit 2 - 30Mar16 and Visit 3 - 25May16 | Incorrect version of form 11 "sample Record Form" used for visits 2 and 3 in error. It is believed that the study booklet was in use during the form switch over, so the forms were not changed.                                                                                                                                                                                                                                                                                  | All study booklets checked again to ensure correct version of form 11 filed. Impact statement: No substantive impact on study.                                                                          |
| various      | various | 21-Jul-16                               | Blood glucose not performed in error for the following patients: RVB01 V1 and V7, RVB02 V3, RVB03 V1, RVB04 V1, RVB07 V1, RVB08 V3 and V7, RVB09 V1 and V3, RVB10 V1, RVB11 V1, V3 and V7, RVB12 V1 and V3, and RVB14 V1.                                                                                                                                                                                                                                                         | Lack of blood glucose concentrations will have minimal or no impact on the study.                                                                                                                       |
| RVB19 and 20 | 1       | 22-Aug-16                               | Both patients (RVB19 and 20) did not have an abdominal ultrasound scan during visit 1. Both patients have recently had an ultrasound scan, therefore the Investigator deemed it unnecessary to repeat.                                                                                                                                                                                                                                                                            | Recent copies of the ultrasonography reports have been printed and authenticated by Investigator signature. Impact statement: This deviation is unlikely to have any impact on the study.               |
| RVB13        | 5       | 19-Sep-16                               | Between V4 and V5 Mrs Robinson changed the diet from Purina HA over to Chappie. Within a few days Dillon showed signs of V+/D+. His CIBDAI score increased by more than 50%. According to the protocol, Dillon should now be fed Purina HA, however Mrs Robinson would like to try the Chappie again. She is currently changing the diet very slowly. If Dillon shows any signs of D+/V+, she will stop and only feed Purina HA for the remainder of the study.                   | Minimal impact on the study - for practical purposes, an insubstantive deviation.                                                                                                                       |
| RVB20        | 1       | 23-Aug-16                               | We were unable to obtain a faecal sample and therefore unable to perform faecal culture and floatation tests. There is no faeces for storage, however, a faecal swab was obtained and stored.                                                                                                                                                                                                                                                                                     | Only partial data for faecal analysis - in reality, unlikely to impact key data derived from the study adversely.                                                                                       |
| RVB22        | 1       | 13-Oct-16                               | Faecal culture results not obtained for visit 1. This is because we were unable to collect a faecal sample from the patient.                                                                                                                                                                                                                                                                                                                                                      | None - Oliver Garden confirmed that faecal culture is unnecessary at this point as the dog has not been                                                                                                 |

|       |     |           |                                                                                                                                                                                                                                                                                                                                                                                                                                                  |                                                                                                                                                                                                                                                                 |
|-------|-----|-----------|--------------------------------------------------------------------------------------------------------------------------------------------------------------------------------------------------------------------------------------------------------------------------------------------------------------------------------------------------------------------------------------------------------------------------------------------------|-----------------------------------------------------------------------------------------------------------------------------------------------------------------------------------------------------------------------------------------------------------------|
|       |     |           | A faecal swab was taken instead, for storage. However, QMHA staff managed to collect a faecal sample in the end but only sent it to the lab for parasitology. We decided not to request a faecal culture test on this sample as the dog was not enrolled on the study (as she did not eat the hypoallergenic diet).                                                                                                                              | enrolled on the study. Impact statement: No substantive impact on study.                                                                                                                                                                                        |
| RVB19 | 1   | 15-Aug-16 | We were unable to collect a faecal sample and therefore unable to perform a faecal culture and floatation tests. There is no faeces for storage, however, a faecal swab was obtained and stored.                                                                                                                                                                                                                                                 | No substantive impact on study.                                                                                                                                                                                                                                 |
| RVB13 | 7   | 07-Nov-16 | On checking the owner diary I noticed that the owner started to introduce Wagg diet on the 15Oct16. She continued to give small amounts of the Wagg diet everyday up till the V7 appointment on 19Oct16. As discussed with Mrs Richardson, Dillon should have only been fed Purina HA exclusively. I am unsure why Mrs Richardson started to introduce the Wagg diet.                                                                            | Impact on study: If Dillon did not experience a deterioration of clinical signs, the impact on the study is likely to be minimal at this visit. If deterioration of clinical signs was experienced the data for V7 may regrettably be challenging to interpret. |
| RVB18 | 3   | N/A       | There are two deviations to records for RVB18: 1) following the endoscopy at V3 Bella's owner reported that Bella was very sick and vomited chicken. This is a deviation as Bella should only be fed Purina HA for a week past endoscopy. WE are unsure where the dog received the chicken. 2) Due to the dog having sickness and diarrhoea post endoscopy we had to prolong the switch over from Purina HA to her normal diet for another week. | 1) Impact on study: single dietary transgression unlikely to influence study in any substantive way - minimal impact. 2) Impact on study: Delayed transition to normal diet unlikely to impact study in any substantive way.                                    |
| RVB18 | 5   | 10-Nov-16 | On 29Oct16 the owner accidentally left the other dogs food down. Bella ate this food and due to this all day on the 29Oct16 she was vomiting. On the 30Oct16 she was lethargic but did not vomit anymore. The owner would now like to keep the dog on Purina HA. She continued to eat Purina HA and the test substance during the bout of sickness.                                                                                              | Impact on study: This dietary indiscretion and the subsequent flare-up of clinical signs may confound interpretation of the data gathered at visit 6. Long-term, this mishap is unlikely to impact the study's overall conclusions.                             |
| RVB23 | N/A | 09-Nov-16 | On speaking to Mrs How she informed me that Dolly has been receiving Non-steroidal, since the 03Nov16. She also gave only 1 sachet of product on the 31Oct16. She now                                                                                                                                                                                                                                                                            | The case will be withdrawn and replaced with a new case in due course.                                                                                                                                                                                          |

|       |     |           |                                                                                                                                                                                                                                                                                                                                                                                                                      |                                                                                                                                                                                                                                                            |
|-------|-----|-----------|----------------------------------------------------------------------------------------------------------------------------------------------------------------------------------------------------------------------------------------------------------------------------------------------------------------------------------------------------------------------------------------------------------------------|------------------------------------------------------------------------------------------------------------------------------------------------------------------------------------------------------------------------------------------------------------|
|       |     |           | asked to be removed from the study due to difficulties with keeping treats away from Dolly due to her grandchildren.                                                                                                                                                                                                                                                                                                 |                                                                                                                                                                                                                                                            |
| RVB20 | 4   | 17-Nov-16 | Mrs Fry reported at V4 that on the 16Nov16 Woody has 3 bouts of watery diarrhoea in the morning. He did not eat his breakfast, however he ate his dinner with the IVP on it. He is back to normal today. The CCECAI score reflects the whole week not just this episode.                                                                                                                                             | Consider it reasonable for patient to have been on normal diet for 4, rather than 7 days on this occasion. Minimal impact on study.                                                                                                                        |
| RVB20 | N/A | 02-Oct-16 | On the 2nd October 2016 Woody may have eaten 3 mouthfuls of his litter mates food. Mrs Fry is sure he didn't eat the food but cannot be 100%. Therefore she has written this in the owner diary. Woody showed no signs of sickness in the days post the possible ingestion.                                                                                                                                          | Impact on study: Minimal impact on study in absence of clinical signs.                                                                                                                                                                                     |
| RVB23 | N/A | 15-Nov-16 | We would normally request the owners to bring back the patients for a withdrawal visit. However as the dog only received one dose of IVP we would have no data and therefore decided to not ask the patient to come back.                                                                                                                                                                                            | Impact on study: No impact on study since dog withdrawn from study.                                                                                                                                                                                        |
| RVB16 | 7   | 01-Dec-16 | Mrs Glenn was unable to collect a urine sample from Rosie this morning. I tried again to obtain a free catch sample, however Rosie was very nervous and would not pass urine.                                                                                                                                                                                                                                        | Impact on study: minimal impact on study.                                                                                                                                                                                                                  |
| RVB18 | 7   | 15-Dec-16 | Mrs Daniel was unable to collect a urine sample, at the appointment we took Bella outside again and she still did not pass any urine. Therefore there is no urine sample for V7.                                                                                                                                                                                                                                     | Minimal Impact on study                                                                                                                                                                                                                                    |
| RVB27 | 1   | 07-Mar-17 | Indigo would not defecate during her time in the hospital and would only urinate on her bed. Therefore a urine and faecal sample were not collected prior to her scope.                                                                                                                                                                                                                                              | Impact statement: Presenting sign at current visit was vomiting - faeces could not be obtained at the first visit - but this is not considered to have a major impact on the study. Lack of urine sample is not considered to have an impact on the study. |
| RVB27 | N/A | 06-Jun-17 | Owner was not able to administer IVP and it was decided that this dog needed to be withdrawn from the study. The owner attempted to but failed to administer the IVP after V2. This continued for several days but the owner did not record it in the owner diary as they felt it was unnecessary as the dog was not taking the test substance. A CIC nurse contacted the owner on 27Apr17 and later emailed them to | Information from Visit 2 will be used as a withdrawal visits. A Urine sample was not collected at this visit and it is required for the normal withdrawal visit. Lack of collection of urine at withdrawal visit has minimal impact on study.              |

|       |            |           |                                                                                                                                                                                                                                                                                                                                     |                                                                                                                                                                                                        |
|-------|------------|-----------|-------------------------------------------------------------------------------------------------------------------------------------------------------------------------------------------------------------------------------------------------------------------------------------------------------------------------------------|--------------------------------------------------------------------------------------------------------------------------------------------------------------------------------------------------------|
|       |            |           | arrange withdrawal from the study. Unfortunately an immediate withdrawal visit was not arranged and the owner was not able to return sooner than the 06Jun17.                                                                                                                                                                       | NTF 18/07/17: Owner only part dosed dog for 5 days between inclusion and V2. Investigator assessed that V2 data needed to be excluded due to non-compliance of dosing.                                 |
| RVB31 | 1          | 18-Apr-17 | Glucose was not run as part of the standard Biochemistry profile. The nurses who collected and sent the sample to the laboratory was not aware of this. Therefore blood glucose results are not available for RVB31 at visit 1.                                                                                                     | Nurse is now aware that a sample for glucose must be collected and sent with the biochemistry sample. Minimal impact on study.                                                                         |
| RVB30 | 1          | 10-Apr-17 | Could not obtain a faecal sample as the dog did not pass faeces during its hospital stay. Could not obtain a sufficient sample during the rectal exam.                                                                                                                                                                              | Swab taken for storage. Sample sent in by owner 5 days post discharge for microbiology and parasitology. All Faecal results were found to be acceptable for enrolment. No significant impact on study. |
| RVB28 | 2          | 04-May-17 | Owner was asked to start IVP on Wednesday the 19May17. They did not understand the significance of this and started the IVP on Tuesday the 18May17. As a result the prearranged Visit 2 appointment was on day 17 and this was not realised until the time of the appointment.                                                      | Minimal impact                                                                                                                                                                                         |
| RVB32 | 1          | 16-May-17 | Dizzy did not pass faeces during her stay in the hospital, therefore a sample could not be obtained for storage or lab testing. The owner was said to have sent a sample in the post following Dizzy's discharge, however this was not received and thought to be lost in the post.                                                 | The owner will be bringing in a fresh faecal sample on V2, as by the time this was realised Dizzy had already started the diet. Parasite and bacteriological examination were negative. No impact.     |
| RVB32 | 1          | 16-May-17 | Urine was collected by the medicine nursing team on the 18th of May 2017 and sent to the laboratory for urinalysis. It was not recorded on its kennel sheet and the clinical investigations team was not informed. Therefore a sample was sent to the laboratory but none was stored.                                               | The medicine nurses were asked if in future all samples collected could be clearly marked on the animals kennel sheet and to inform the CIC team. Minimal Impact.                                      |
| RVB30 | withdrawal | 03-Jul-17 | This dog had an ongoing skin condition. On 19May17 the referring vet prescribed Apoquel and cephalexin. Both of these drugs are considered to interfere with parameters on this study. Therefore a decision was made to withdraw this dog from the study. The dog has received medication for several days before CIC was informed. | Data from Visit 2 to be used as withdrawal visit.                                                                                                                                                      |
| RVB29 | 5          | 20-Jul-17 | This dog had started on Purina HA prior to enrolment on the study. The owner was very reluctant to change the diet                                                                                                                                                                                                                  | Minimal impact on study                                                                                                                                                                                |

|       |     |           |                                                                                                                                                                                                                                                                                                                                                                                                                                                                                  |                                                                                                                                                                                                                                                                                                                                                                                                                                                                                                          |
|-------|-----|-----------|----------------------------------------------------------------------------------------------------------------------------------------------------------------------------------------------------------------------------------------------------------------------------------------------------------------------------------------------------------------------------------------------------------------------------------------------------------------------------------|----------------------------------------------------------------------------------------------------------------------------------------------------------------------------------------------------------------------------------------------------------------------------------------------------------------------------------------------------------------------------------------------------------------------------------------------------------------------------------------------------------|
|       |     |           | since the number of episode of vomiting and diarrhoea had been greatly reduced since the dog started on the diet. At visit 5 the owner agreed to switch the diet to the dog was being fed prior to Purina HA.                                                                                                                                                                                                                                                                    |                                                                                                                                                                                                                                                                                                                                                                                                                                                                                                          |
| RVB29 | 7   | 23-Aug-17 | We were unable to collect a urine sample from the patient on the day of the visit. The owners were given a pot to collect a urine sample and post this as soon as possible. The sample was received in the post 48hrs after the visit and processed according to the protocol.                                                                                                                                                                                                   | Minimal Impact on study                                                                                                                                                                                                                                                                                                                                                                                                                                                                                  |
| RVB29 | 3   | 26-Jun-17 | Histopathology samples were not collected and sent to the laboratory for analysis during the second endoscopy in error. Impact statement: this has an impact on study as no adequate histology samples are available to include this dog in the comparison between the endoscopies, frozen karnovski fixative samples were evaluated but considered inadequate. All other parameters collected from this dog (e.g. clinical score, blood results etc.) can be included and used. | Staff were retrained on the study protocol. Form 11 of the study booklet was redesigned to include the collection of samples for histopathology and fluoride oxalate for biochemistry, to reduce the risk of future errors. Frozen Karnovsky samples from the colon and duodenum were sent to histopathology laboratory to assess suitability for histological evaluation. A copy of the results have been placed in the study Booklet. Histology findings re to be assessed prior to inclusion of data. |
| RVB31 | 3   | 11-Jul-17 | Histology samples were not collected and sent to the laboratory for analysis during the second endoscopy in error. Impact statement: this has an impact on study as no adequate samples are available for comparison between 1st and 2nd endoscopy. Frozen Karnovski fixative samples were evaluated but considered inadequate. All other parameters collected for this dog can be included.                                                                                     | Staff will be retrained on the study protocol. Form 11 of the study booklet was redesigned to include the collection of samples for histopathology and fluoride oxalate for biochemistry, to reduce the risk of future errors. Frozen samples from the colon and duodenum were sent to histopathology laboratory to assess suitability for histological evaluation. A copy of the results have been placed in the study Booklet. Histology findings re to be assessed prior to inclusion of data.        |
| RVB35 | 2   | 25-Dec-17 | Roxy ate some turkey and potatoes on Christmas day (25Dec17), when she should only be fed Purina HA.                                                                                                                                                                                                                                                                                                                                                                             | Owners confirmed that no other treats have been fed and that they understand Roxy should be fed Purina HA only. Impact statement: Minimal Impact.                                                                                                                                                                                                                                                                                                                                                        |
| N/A   | N/A | N/A       | Statistical Analysis of the data was performed on R instead of SPSS.                                                                                                                                                                                                                                                                                                                                                                                                             | Appropriate Statistics were applied in order to analyse the data. No impact on the study results                                                                                                                                                                                                                                                                                                                                                                                                         |

TABLE A40. Concomitant medication - Group 1.

| Group | Treatment | Patient No. | Start Date | Generic Drug Name       | Trade Name | Dose   | Units | Route | Frequency  | End Date  |
|-------|-----------|-------------|------------|-------------------------|------------|--------|-------|-------|------------|-----------|
| 1     | BIOEC2015 | RVB01       | 15-Oct-15  | Fenbendazole            | Panacur    | 2.25   | g     | PO    | Once daily | 20-Oct-15 |
| 1     | BIOEC2015 | RVB01       | 11-Nov-15  | Maropitant              | Cerenia    | 8      | mg    | PO    | Once       | 11-Nov-15 |
| 1     | BIOEC2015 | RVB01       | 17-Nov-15  | Milbemycin/Praziquantel | Milbemax   | 2.5/25 | mg    | PO    | Once       | 17-Nov-15 |
| 1     | BIOEC2015 | RVB01       | 16-Dec-15  | Maropitant              | Cerenia    | 8      | mg    | PO    | once       | 16-Dec-15 |
| 1     | BIOEC2015 | RVB01       | 28-Dec-15  | Fluralaner              | Biavecto   | 250    | mg    | PO    | Once       | 28-Dec-15 |
| 1     | BIOEC2015 | RVB01       | 04-Jan-16  | Maropitant              | Cerenia    | 8      | mg    | PO    | Once       | 04-Jan-16 |
| 1     | BIOEC2015 | RVB01       | 06-Jan-16  | Methadone               | Methadone  | 2      | mg    | IV    | Once       | 06-Jan-16 |
| 1     | BIOEC2015 | RVB01       | 06-Jan-16  | Acepromazine            | ACP        | 0.1    | mg    | IV    | Once       | 06-Jan-16 |
| 1     | BIOEC2015 | RVB01       | 06-Jan-16  | Propafol                | Propafol+  | 60     | mg    | IV    | Once       | 06-Jan-16 |
| 1     | BIOEC2015 | RVB01       | 06-Jan-16  | Atropine                | Atropine   | 0.2    | mg    | IV    | Once       | 06-Jan-16 |
| 1     | BIOEC2015 | RVB01       | 29-Feb-16  | Milbemycin/Praziquantel | Milbemax   | 2.5/25 | mg    | PO    | Once       | 29-Feb-16 |
| 1     | BIOEC2015 | RVB01       | 02-Mar-16  | Maropitant              | Cerenia    | 8      | mg    | PO    | Once       | 02-Mar-16 |
| 1     | BIOEC2015 | RVB07       | 10-Dec-15  | B12 Injection           | Vitbee     | 0.25   | mg    | SC    | Once       | 10-Dec-15 |
| 1     | BIOEC2015 | RVB07       | 17-Dec-15  | B12 Injection           | Vitbee     | 0.25   | mg    | SC    | Once       | 17-Dec-15 |
| 1     | BIOEC2015 | RVB07       | 23-Dec-15  | B12 Injection           | Vitbee     | 0.25   | mg    | SC    | Once       | 23-Dec-15 |
| 1     | BIOEC2015 | RVB08       | 10-Dec-15  | Fenbendazole            | Panacur    | 4.5    | g     | PO    | SID        | 15-Dec-15 |
| 1     | BIOEC2015 | RVB08       | 24-Feb-16  | Methadone               | Methadone  | 3.65   | mg    | IV    | once       | 24-Feb-16 |
| 1     | BIOEC2015 | RVB08       | 24-Feb-16  | Propofol                | Propafol+  | 130    | mg    | IV    | once       | 24-Feb-16 |

A study investigating the efficacy of BIOEC2015 in reducing the clinical signs associated with canine inflammatory bowel disease (IBD)

FINAL



|   |           |       |           |                                              |                       |             |     |            |      |           |
|---|-----------|-------|-----------|----------------------------------------------|-----------------------|-------------|-----|------------|------|-----------|
| 1 | BIOEC2015 | RVB08 | 24-Feb-16 | Isoflurane                                   | Isoflo                | n/a         | n/a | Inhalation | Once | 24-Feb-16 |
| 1 | BIOEC2015 | RVB08 | 24-Feb-16 | Sevoflurane                                  | Sevoflo               | n/a         | n/a | Inhalation | Once | 24-Feb-16 |
| 1 | BIOEC2015 | RVB08 | 09-Apr-16 | Febanantel/Pyrantel<br>Embonate/Praziquantel | Drontal<br>Tasty Bone | 300/288/100 | mg  | PO         | Once | 09-Apr-16 |
| 1 | BIOEC2015 | RVB13 | 10-Jun-16 | Omeprazole                                   | Omeprazole            | 40          | mg  | PO         | SID  | 17-Jun-16 |
| 1 | BIOEC2015 | RVB13 | 25-Aug-16 | Buprenorphine                                | Buprecare             | 0.777       | mg  | IV         | Once | 25-Aug-16 |
| 1 | BIOEC2015 | RVB13 | 25-Aug-16 | Acepromazine                                 | ACP                   | 0.3885      | mg  | IV         | Once | 25-Aug-16 |
| 1 | BIOEC2015 | RVB13 | 25-Aug-16 | Propafol                                     | Propoflo              | 120         | mg  | IV         | Once | 25-Aug-16 |
| 1 | BIOEC2015 | RVB13 | 25-Aug-16 | Propafol                                     | Propoflo              | 19          | mg  | IV         | Once | 25-Aug-16 |
| 1 | BIOEC2015 | RVB13 | 25-Aug-16 | Sevoflurane                                  | Sevoflo               | n/a         | n/a | Inhalation | Once | 25-Aug-16 |
| 1 | BIOEC2015 | RVB16 | 10-Sep-15 | Phenylpropanolamine                          | Urilin                | 10          | mg  | PO         | BID  | Ongoing   |
| 1 | BIOEC2015 | RVB16 | 04-Aug-16 | Maropitant                                   | Cerenia               | 24          | mg  | PO         | Once | 04-Aug-16 |
| 1 | BIOEC2015 | RVB16 | 09-Aug-16 | Maropitant                                   | Cerenia               | 24          | mg  | PO         | Once | 09-Aug-16 |
| 1 | BIOEC2015 | RVB16 | 02-Oct-16 | Maropitant                                   | Cerenia               | 24          | mg  | PO         | Once | 02-Oct-16 |
| 1 | BIOEC2015 | RVB16 | 19-Sep-16 | Chlorphenamine                               | Piriton               | 4           | mg  | PO         | Once | 19-Sep-16 |
| 1 | BIOEC2015 | RVB16 | 07-Oct-16 | Butorphanol                                  | Alvegesic             | 1.9         | mg  | IV         | Once | 07-Oct-16 |
| 1 | BIOEC2015 | RVB16 | 07-Oct-16 | Medetomidine                                 | Sedastart             | 0.019       | mg  | IV         | Once | 07-Oct-16 |
| 1 | BIOEC2015 | RVB16 | 07-Oct-16 | Propafol                                     | Propoflo              | 40          | mg  | IV         | Once | 07-Oct-16 |
| 1 | BIOEC2015 | RVB16 | 07-Oct-16 | Buprenorphine                                | Buprecare             | 0.19        | mg  | IV         | Once | 07-Oct-16 |
| 1 | BIOEC2015 | RVB16 | 07-Oct-16 | Sevoflurane                                  | Sevoflo               | n/a         | n/a | Inhalation | Once | 07-Oct-16 |
| 1 | BIOEC2015 | RVB16 | 07-Oct-16 | Isoflurane                                   | Isoflo                | n/a         | n/a | Inhalation | Once | 07-Oct-16 |
| 1 | BIOEC2015 | RVB16 | 07-Oct-16 | Propafol                                     | Propoflo              | 5           | mg  | IV         | Once | 07-Oct-16 |
| 1 | BIOEC2015 | RVB16 | 07-Oct-16 | Medetomidine                                 | Sedastart             | 0.029       | mg  | IV         | Once | 07-Oct-16 |
| 1 | BIOEC2015 | RVB16 | 07-Oct-16 | Butorphanol                                  | Alvegesic             | 1.9         | mg  | IV         | Once | 07-Oct-16 |

A study investigating the efficacy of BIOEC2015 in reducing the clinical signs associated with canine inflammatory bowel disease (IBD)

FINAL

|   |           |       |           |               |            |       |     |            |      |           |
|---|-----------|-------|-----------|---------------|------------|-------|-----|------------|------|-----------|
| 1 | BIOEC2015 | RVB16 | 13-Oct-16 | Maropitant    | Cerenia    | 24    | mg  | PO         | Once | 13-Oct-16 |
| 1 | BIOEC2015 | RVB16 | 16-Nov-16 | Leptospirosis | Nobivac L4 | n/a   | n/a | SC         | Once | 16-Nov-16 |
| 1 | BIOEC2015 | RVB18 | 17-Aug-16 | B12 Injection | Vitbee     | 0.05  | mg  | SC         | Once | 17-Aug-16 |
| 1 | BIOEC2015 | RVB18 | 06-Aug-16 | Fenbendazole  | Panacur    | 1.8   | g   | PO         | SID  | 08-Aug-16 |
| 1 | BIOEC2015 | RVB18 | 24-Aug-16 | B12 Injection | Vitbee     | 0.05  | mg  | SC         | Once | 24-Aug-16 |
| 1 | BIOEC2015 | RVB18 | 02-Sep-16 | B12 Injection | Vitbee     | 0.05  | mg  | SC         | Once | 02-Sep-16 |
| 1 | BIOEC2015 | RVB18 | 09-Sep-16 | B12 Injection | Vitbee     | 0.05  | mg  | SC         | Once | 09-Sep-16 |
| 1 | BIOEC2015 | RVB18 | 16-Sep-16 | B12 Injection | Vitbee     | 0.05  | mg  | SC         | Once | 16-Sep-16 |
| 1 | BIOEC2015 | RVB18 | 24-Sep-16 | B12 Injection | Vitbee     | 0.05  | mg  | SC         | Once | 24-Sep-16 |
| 1 | BIOEC2015 | RVB18 | 08-Oct-16 | B12 Injection | Vitbee     | 0.05  | mg  | SC         | Once | 08-Oct-16 |
| 1 | BIOEC2015 | RVB18 | 08-Sep-16 | Fenbendazole  | Panacur    | 1.8   | g   | PO         | Once | 08-Sep-16 |
| 1 | BIOEC2015 | RVB18 | 20-Oct-16 | Medetomidine  | Sedastart  | 0.085 | mg  | IV         | Once | 20-Oct-16 |
| 1 | BIOEC2015 | RVB18 | 20-Oct-16 | Butorphanol   | Alvegesic  | 1.7   | mg  | IV         | Once | 20-Oct-16 |
| 1 | BIOEC2015 | RVB18 | 20-Oct-16 | Propafol      | Propoflo   | 15    | mg  | IV         | Once | 20-Oct-16 |
| 1 | BIOEC2015 | RVB18 | 20-Oct-16 | Sevoflurane   | Sevoflo    | n/a   | n/a | Inhalation | Once | 20-Oct-16 |
| 1 | BIOEC2015 | RVB18 | 20-Oct-16 | Omeprazole    | Omeprazole | 8.5   | mg  | IV         | Once | 20-Oct-16 |
| 1 | BIOEC2015 | RVB18 | 20-Oct-16 | Propafol      | Propoflo   | 25    | mg  | IV         | Once | 20-Oct-16 |
| 1 | BIOEC2015 | RVB18 | 20-Oct-16 | Medetomidine  | Sedastart  | 0.085 | mg  | IV         | Once | 20-Oct-16 |
| 1 | BIOEC2015 | RVB18 | 24-Oct-16 | B12 Injection | Vitbee     | 0.05  | mg  | SC         | Once | 24-Oct-16 |
| 1 | BIOEC2015 | RVB18 | 03-Nov-16 | Imidacloprid  | Advantage  | 100   | mg  | Topical    | Once | 03-Nov-16 |
| 1 | BIOEC2015 | RVB18 | 21-Nov-16 | B12 Injection | Vitbee     | 0.05  | mg  | SC         | Once | 21-Nov-16 |
| 1 | BIOEC2015 | RVB18 | 12-Dec-16 | Imidacloprid  | Advantage  | 100   | mg  | Topical    | Once | 12-Dec-16 |
| 1 | BIOEC2015 | RVB27 | 14-Mar-17 | Vitamin B12   | VitBee250  | 800   | µg  | SC         | Once | 14-Mar-17 |
| 1 | BIOEC2015 | RVB27 | 21-Mar-17 | B12 Cobalamin | Anivet     | 800   | µg  | SC         | Once | 21-Mar-17 |
| 1 | BIOEC2015 | RVB27 | 06-Apr-17 | B12 Injection | Anivit B12 | 800   | mcg | SC         | Once | 06-Apr-17 |
| 1 | BIOEC2015 | RVB27 | 28-Mar-17 | B12 Injection | Anivit B12 | 800   | mcg | SC         | Once | 28-Mar-17 |
| 1 | BIOEC2015 | RVB29 | 07-Apr-17 | Tramadol      | Tramadol   | 50    | mg  | PO         | SID  | 04-May-17 |
| 1 | BIOEC2015 | RVB29 | 07-May-17 | Selamectin    | Stronghold | 240   | mg  | Topical    | Once | 07-May-17 |
| 1 | BIOEC2015 | RVB29 | 28-Jun-17 | Methadone     | Synthadon  | 5.21  | mg  | IV         | Once | 28-Jun-17 |

A study investigating the efficacy of BIOEC2015 in reducing the clinical signs associated with canine inflammatory bowel disease (IBD)

FINAL

|   |           |       |           |                                 |                 |            |     |            |      |           |
|---|-----------|-------|-----------|---------------------------------|-----------------|------------|-----|------------|------|-----------|
| 1 | BIOEC2015 | RVB29 | 28-Jun-17 | Acepromazine                    | ACP             | 0.13       | mg  | IV         | Once | 28-Jun-17 |
| 1 | BIOEC2015 | RVB29 | 28-Jun-17 | Sevoflurane                     | Sevoflo         | N/A        | N/A | Inhalation | Once | 28-Jun-17 |
| 1 | BIOEC2015 | RVB29 | 28-Jun-17 | Propofol                        | Propoflo Plus   | 190        | mg  | IV         | Once | 28-Jun-17 |
| 1 | BIOEC2015 | RVB32 | 20-May-17 | Vitamin B12                     | VitBee          | 1          | mg  | SC         | Once | 20-May-17 |
| 1 | BIOEC2015 | RVB32 | 27-May-17 | Vitamin B12                     | VitBee          | 1          | mg  | SC         | Once | 27-May-17 |
| 1 | BIOEC2015 | RVB32 | 03-Jun-17 | Vitamin B12                     | VitBee          | 1          | mg  | SC         | Once | 03-Jun-17 |
| 1 | BIOEC2015 | RVB32 | 10-Jun-17 | Vitamin B12                     | VitBee          | 1          | mg  | SC         | Once | 10-Jun-17 |
| 1 | BIOEC2015 | RVB32 | 04-Jun-17 | Milbemycin Oxime / Praziquantel | Milquantel      | 12.5 / 125 | mg  | PO         | Once | 04-Jun-17 |
| 1 | BIOEC2015 | RVB32 | 04-Jul-17 | Milbemycin Oxime / Praziquantel | Milquantel      | 12.5 / 125 | mg  | PO         | Once | 04-Jul-17 |
| 1 | BIOEC2015 | RVB32 | 04-Aug-17 | Milbemycin Oxime / Praziquantel | Milquantel      | 12.5 / 125 | mg  | PO         | Once | 04-Aug-17 |
| 1 | BIOEC2015 | RVB32 | 09-Aug-17 | Methadone                       | Synthadon       | 4.8        | mg  | IV         | Once | 09-Aug-17 |
| 1 | BIOEC2015 | RVB32 | 09-Aug-17 | Acepromazine                    | ACP             | 0.12       | mg  | IM         | Once | 09-Aug-17 |
| 1 | BIOEC2015 | RVB32 | 09-Aug-17 | Propofol                        | Propoflo Plus   | 120        | mg  | IV         | Once | 09-Aug-17 |
| 1 | BIOEC2015 | RVB32 | 09-Aug-17 | Sevoflurane                     | Sevoflo         | N/A        | N/A | Inhalation | Once | 09-Aug-17 |
| 1 | BIOEC2015 | RVB32 | 17-Jun-17 | Cobalamine                      | VitBee250       | 1          | mg  | SC         | Once | 17-Jun-17 |
| 1 | BIOEC2015 | RVB32 | 24-Jun-17 | Cobalamine                      | VitBee250       | 1          | mg  | SC         | Once | 24-Jun-17 |
| 1 | BIOEC2015 | RVB32 | 16-Aug-17 | Fluralaner                      | Bravecto        | 1000       | mg  | PO         | Once | 16-Aug-17 |
| 1 | BIOEC2015 | RVB32 | 04-Sep-17 | Milbemycin / Praziquantel       | Milquantel      | 12.5 / 125 | mg  | PO         | Once | 04-Sep-17 |
| 1 | BIOEC2015 | RVB32 | 22-Sep-17 | Amoxicillin / Clavulanic Acid   | Synulox         | 200 / 50   | mg  | PO         | BID  | 27-Sep-17 |
| 1 | BIOEC2015 | RVB32 | 22-Sep-17 | Robenacoxib                     | Onsior          | 40         | mg  | PO         | SID  | 27-Sep-17 |
| 1 | BIOEC2015 | RVB32 | 02-Oct-17 | Leptospira Interrogans          | Nobivac lepto 4 | 1          | ml  | SC         | Once | 02-Oct-17 |

|   |           |       |           |                                      |               |        |     |            |      |           |
|---|-----------|-------|-----------|--------------------------------------|---------------|--------|-----|------------|------|-----------|
| 1 | BIOEC2015 | RVB32 | 02-Oct-17 | Distemper, Adenovirus 2 + parvovirus | Nobivac DHP   | 1      | ml  | SC         | Once | 02-Oct-17 |
| 1 | BIOEC2015 | RVB32 | 02-Oct-17 | Bordatella Bronchiseptica            | Nobivac KC    | 0.4    | ml  | Nasal      | Once | 02-Oct-17 |
| 1 | BIOEC2015 | RVB35 | 28-Feb-18 | Methadone                            | Synthadon     | 3.608  | mg  | IV         | Once | 28-Feb-18 |
| 1 | BIOEC2015 | RVB35 | 28-Feb-18 | Acepromazine                         | ACP           | 0.0902 | mg  | IV         | Once | 28-Feb-18 |
| 1 | BIOEC2015 | RVB35 | 28-Feb-18 | Propofol                             | Propoflo Plus | 110    | mg  | IV         | Once | 28-Feb-18 |
| 1 | BIOEC2015 | RVB35 | 28-Feb-18 | Isoflurane                           | Isocare       | n/a    | n/a | Inhalation | Once | 28-Feb-18 |
| 1 | BIOEC2015 | RVB35 | 28-Feb-18 | Sevoflurane                          | Sevoflo       | n/a    | n/a | Inhalation | Once | 28-Feb-18 |
| 1 | BIOEC2015 | RVB35 | 28-Feb-18 | Propofol                             | Propoflo Plus | 9.02   | mg  | IV         | Once | 28-Feb-18 |

TABLE A41. Concomitant medication - Group 2.

| Group | Treatment | Patient No. | Start Date | Generic Drug Name       | Trade Name    | Dose    | Units | Route      | Frequency    | End Date  |
|-------|-----------|-------------|------------|-------------------------|---------------|---------|-------|------------|--------------|-----------|
| 2     | Placebo   | RVB02       | 28-Nov-15  | Imidacloprid/Moxidectin | Advocate      | 100/25  | mg    | Topical    | Once a month | 28-Dec-15 |
| 2     | Placebo   | RVB02       | 07-Jan-16  | Butorphanol             | Alvegesic     | 2.4     | mg    | IV         | Once         | 07-Jan-16 |
| 2     | Placebo   | RVB02       | 07-Jan-16  | Acepromazine            | ACP           | 0.03    | mg    | IV         | Once         | 07-Jan-16 |
| 2     | Placebo   | RVB02       | 07-Jan-16  | Propofol                | Propoflo Plus | 20      | mg    | IV         | Once         | 07-Jan-16 |
| 2     | Placebo   | RVB02       | 07-Jan-16  | Sevoflurane             | Sevoflo       | n/a     | n/a   | Inhalation | Two doses    | 07-Jan-16 |
| 2     | Placebo   | RVB02       | 07-Jan-16  | Medetomidine            | Sedastart     | 0.008   | mg    | IV         | Once         | 07-Jan-16 |
| 2     | Placebo   | RVB05       | 23-Oct-15  | B12 Injection           | Anivit B12    | 0.25    | mg    | SC         | Once         | 23-Oct-16 |
| 2     | Placebo   | RVB05       | 05-Dec-15  | Cyclosporine            | Atopica       | 1000    | mg    | PO         | SID          | Ongoing   |
| 2     | Placebo   | RVB05       | 05-Dec-15  | Prednisolone            | Prednisolone  | 40      | mg    | PO         | SID          | Ongoing   |
| 2     | Placebo   | RVB05       | 04-Dec-15  | B12 Injection           | Vitbee        | 0.25    | mg    | SC         | Once         | 04-Dec-15 |
| 2     | Placebo   | RVB05       | 10-Dec-15  | B12 Injection           | Vitbee        | 0.25    | mg    | SC         | Once         | 10-Dec-15 |
| 2     | Placebo   | RVB05       | 17-Dec-15  | B12 Injection           | Vitbee        | 0.25    | mg    | SC         | Once         | 17-Dec-15 |
| 2     | Placebo   | RVB09       | 03-Feb-16  | B12 Injection           | Vitbee        | 0.75    | mg    | SC         | Once         | 03-Feb-16 |
| 2     | Placebo   | RVB09       | 12-Feb-16  | B12 Injection           | Vitbee        | 0.75    | mg    | SC         | Once         | 12-Feb-16 |
| 2     | Placebo   | RVB09       | 17-Feb-16  | B12 Injection           | Vitbee        | 0.75    | mg    | SC         | Once         | 17-Feb-16 |
| 2     | Placebo   | RVB09       | 24-Feb-16  | B12 Injection           | Vitbee        | 0.75    | mg    | SC         | Once         | 24-Feb-16 |
| 2     | Placebo   | RVB09       | 02-Mar-16  | B12 Injection           | Vitbee        | 0.75    | mg    | SC         | Once         | 02-Mar-16 |
| 2     | Placebo   | RVB09       | 05-Apr-16  | B12 Injection           | Vitbee        | 0.75    | mg    | SC         | Once         | 05-Apr-16 |
| 2     | Placebo   | RVB09       | 12-Apr-16  | B12 Injection           | Vitbee        | 0.75    | mg    | SC         | Once         | 12-Apr-16 |
| 2     | Placebo   | RVB09       | 18-Apr-16  | B12 Injection           | Vitbee        | 0.75    | mg    | SC         | Once         | 18-Apr-16 |
| 2     | Placebo   | RVB11       | 05-Feb-16  | Fenbendazole            | Panacur       | 6.75    | g     | PO         | SID          | 09-Feb-16 |
| 2     | Placebo   | RVB11       | 07-Apr-16  | Imidacloprid/Moxidectin | Advocate      | 400/100 | mg    | Topical    | Once         | 07-Apr-16 |
| 2     | Placebo   | RVB11       | 22-Apr-16  | Buprenorphine           | Buprecare     | 0.594   | mg    | IM         | Twice        | 22-Apr-16 |

A study investigating the efficacy of BIOEC2015 in reducing the clinical signs associated with canine inflammatory bowel disease (IBD)

FINAL

|   |         |       |           |                                    |                 |             |         |             |      |           |
|---|---------|-------|-----------|------------------------------------|-----------------|-------------|---------|-------------|------|-----------|
| 2 | Placebo | RVB11 | 22-Apr-16 | Medetomidine                       | Sedastart       | 0.297       | mg      | IM          | Once | 22-Apr-16 |
| 2 | Placebo | RVB11 | 22-Apr-16 | Propafol                           | Vetafol         | 50          | mg      | IV          | Once | 22-Apr-16 |
| 2 | Placebo | RVB11 | 22-Apr-16 | Isoflurane                         | Isocare         | n/a         | n/a     | Inhalation  | Once | 22-Apr-16 |
| 2 | Placebo | RVB11 | 25-May-16 | Nobivac Lepto 4                    | Nobivac lepto 4 | n/a         | Vaccine | SC          | Once | 25-May-16 |
| 2 | Placebo | RVB11 | 25-May-16 | Nobivac KC                         | Nobivac KC      | n/a         | Vaccine | Intra-nasal | Once | 25-May-16 |
| 2 | Placebo | RVB12 | 12-Mar-16 | Omeprazole                         | Omeprazole      | 40          | mg      | PO          | SID  | 18-Mar-16 |
| 2 | Placebo | RVB12 | 11-Mar-16 | Fenbendazole                       | Panacur         | 1700        | mg      | PO          | SID  | 13-Mar-16 |
| 2 | Placebo | RVB12 | 07-Apr-16 | B12 Injection                      | Vitbee          | 1           | mg      | SC          | Once | 07-Apr-16 |
| 2 | Placebo | RVB12 | 14-Apr-16 | B12 Injection                      | Vitbee          | 1           | mg      | SC          | Once | 14-Apr-16 |
| 2 | Placebo | RVB12 | 21-Apr-16 | B12 Injection                      | Vitbee          | 1           | mg      | SC          | Once | 21-Apr-16 |
| 2 | Placebo | RVB12 | 27-Apr-16 | Ranitide                           | Zantac          | 75          | mg      | SC          | Once | 27-Apr-16 |
| 2 | Placebo | RVB12 | 27-Apr-16 | Buprenorphine                      | Buprendale      | 0.67        | mg      | IM          | Once | 27-Apr-16 |
| 2 | Placebo | RVB12 | 27-Apr-16 | Maropitant                         | Cerenia         | 30          | mg      | SC          | Once | 27-Apr-16 |
| 2 | Placebo | RVB12 | 05-May-16 | B12 Injection                      | Vitbee          | 1           | mg      | SC          | Once | 05-May-16 |
| 2 | Placebo | RVB12 | 17-May-16 | B12 Injection                      | Vitbee          | 1           | mg      | SC          | Once | 17-May-16 |
| 2 | Placebo | RVB20 | 24-Aug-16 | Fenbendazole                       | Panacur         | 4.5         | g       | PO          | SID  | 03-Sep-16 |
| 2 | Placebo | RVB20 | 09-Sep-16 | Imidacloprid/Moxidectin            | Advocate        | 250/62.5    | mg      | Topical     | Once | 09-Sep-16 |
| 2 | Placebo | RVB20 | 29-Sep-06 | Praziquantel/Pyrantel/<br>Febantel | Cazitel         | 50/49.8/250 | mg      | PO          | Once | 29-Sep-16 |
| 2 | Placebo | RVB20 | 03-Nov-16 | Fenbendazole                       | Panacur         | 4.5         | g       | PO          | Once | 03-Nov-16 |
| 2 | Placebo | RVB20 | 03-Nov-16 | DA2Pi/CPV-L                        | Vanguard        | n/a         | n/a     | SC          | Once | 03-Nov-16 |
| 2 | Placebo | RVB20 | 10-Nov-16 | Medetomidine                       | Domitor         | 0.06        | mg      | IV          | Once | 10-Nov-16 |
| 2 | Placebo | RVB20 | 10-Nov-16 | Butorphanol                        | Torbugesic      | 5.99        | mg      | IV          | Once | 10-Nov-16 |
| 2 | Placebo | RVB20 | 10-Nov-16 | Propofol                           | Propoflo        | 20          | mg      | IV          | Once | 10-Nov-16 |
| 2 | Placebo | RVB20 | 10-Nov-16 | Propofol                           | Propoflo        | 6           | mg      | IV          | Once | 10-Nov-16 |
| 2 | Placebo | RVB20 | 10-Nov-16 | Propofol                           | Propoflo        | 5           | mg      | IV          | Once | 10-Nov-16 |
| 2 | Placebo | RVB20 | 10-Nov-16 | Propofol                           | Propoflo        | 4           | mg      | IV          | Once | 10-Nov-16 |
| 2 | Placebo | RVB20 | 12-Nov-16 | Imidacloprid/Moxidectin            | Advocate        | 250/62.5    | mg      | Topical     | Once | 12-Nov-16 |

A study investigating the efficacy of BIOEC2015 in reducing the clinical signs associated with canine inflammatory bowel disease (IBD)

FINAL

|   |         |       |           |                               |                   |          |      |            |      |           |
|---|---------|-------|-----------|-------------------------------|-------------------|----------|------|------------|------|-----------|
| 2 | Placebo | RVB20 | 16-Dec-16 | Imidacloprid/Moxidectin       | Advocate          | 250/62.5 | mg   | Topical    | Once | 16-Dec-16 |
| 2 | Placebo | RVB28 | 01-Apr-17 | Fenbendazole                  | Panacur 22 %      | 2        | g    | PO         | SID  | 10-Apr-17 |
| 2 | Placebo | RVB30 | 18-Apr-17 | Artuvetrin                    |                   | 0.6      | ml   | SC         | Once | 18-Apr-17 |
| 2 | Placebo | RVB30 | 30-Apr-17 | Fusidic Acid                  | Isathal Eye drops | 1        | Drop | Topical    | BID  | 07-May-17 |
| 2 | Placebo | RVB30 | 01-May-17 | Milbemycin Oxime/Praziquantel | Milbemax Tablets  | 12.5/125 | mg   | Oral       | Once | 01-May-17 |
| 2 | Placebo | RVB31 | 27-Apr-17 | B12                           | VitBee250         | 0.5      | mg   | SC         | Once | 27-Apr-17 |
| 2 | Placebo | RVB31 | 03-May-17 | Cobalamine                    | VitBee250         | 0.5      | mg   | SC         | Once | 03-May-17 |
| 2 | Placebo | RVB31 | 11-May-17 | Cobalamine                    | VitBee250         | 0.5      | mg   | SC         | Once | 11-May-17 |
| 2 | Placebo | RVB31 | 18-May-17 | Cobalamine                    | VitBee250         | 0.5      | mg   | SC         | Once | 18-May-17 |
| 2 | Placebo | RVB31 | 15-Jun-17 | Cobalamine                    | VitBee250         | 0.5      | mg   | SC         | Once | 15-Jun-17 |
| 2 | Placebo | RVB31 | 13-Jul-17 | Medetomidine                  | Sedastart         | 0.06     | mg   | IM         | Once | 13-Jul-17 |
| 2 | Placebo | RVB31 | 13-Jul-17 | Butorphanol                   | Alvegesic         | 2.5      | mg   | IM         | Once | 13-Jul-17 |
| 2 | Placebo | RVB31 | 13-Jul-17 | Medetomidine                  | Sedastart         | 0.06     | mg   | IM         | Once | 13-Jul-17 |
| 2 | Placebo | RVB31 | 13-Jul-17 | Sevoflurane                   | Sevoflo           | N/A      | N/A  | Inhalation | Once | 13-Jul-17 |
| 2 | Placebo | RVB31 | 13-Jul-17 | Propofol                      | Propoflo Plus     | 11.9     | mg   | IV         | Once | 13-Jul-17 |
| 2 | Placebo | RVB31 | 26-Jul-17 | Cobalamine                    | VitBee250         | 0.5      | mg   | SC         | Once | 26-Jul-17 |
| 2 | Placebo | RVB34 | 15-Nov-17 | Leptspirosis                  | Nobivac L4        | 1        | ml   | SC         | Once | 15-Nov-17 |
| 2 | Placebo | RVB34 | 15-Nov-17 | Bordetella Bronchiseptica     | Nobivac KC        | 0.4      | ml   | Nasal      | Once | 15-Nov-17 |
| 2 | Placebo | RVB34 | 03-Dec-17 | Praziquantel                  | Droncit           | 150      | mg   | po         | Once | 03-Dec-17 |
| 2 | Placebo | RVB34 | 12-Nov-17 | Imadacloprid/Moxidectin       | Advocate XL       | 400/100  | mg   | topical    | Once | 12-Nov-17 |
| 2 | Placebo | RVB34 | 11-Oct-17 | Imadacloprid/Moxidectin       | Advocate XL       | 400/100  | mg   | topical    | Once | 11-Oct-17 |
| 2 | Placebo | RVB34 | 07-Dec-17 | Methadone                     | Synthadon         | 4.95     | mg   | IV         | Once | 07-Dec-17 |
| 2 | Placebo | RVB34 | 07-Dec-17 | Acepromazine                  | ACP               | 0.124    | mg   | IV         | Once | 07-Dec-17 |
| 2 | Placebo | RVB34 | 07-Dec-17 | Midazolam                     | Hypnovel          | 4.95     | mg   | IV         | Once | 07-Dec-17 |
| 2 | Placebo | RVB34 | 07-Dec-17 | Propofol                      | Propoflo Plus     | unknown  | mg   | IV         | Once | 07-Dec-17 |
| 2 | Placebo | RVB34 | 07-Dec-17 | Sevofluorane                  | Sevoflo           | n/a      | n/a  | inhalation | Once | 07-Dec-17 |

A study investigating the efficacy of BIOEC2015 in reducing the clinical signs associated with canine inflammatory bowel disease (IBD)

FINAL

---

|   |         |       |           |                         |             |         |    |         |      |           |
|---|---------|-------|-----------|-------------------------|-------------|---------|----|---------|------|-----------|
| 2 | Placebo | RVB34 | 14-Dec-17 | Imadacloprid/Moxidectin | Advocate XL | 400/100 | mg | topical | Once | 14-Dec-17 |
| 2 | Placebo | RVB34 | 16-Jan-18 | Imadacloprid/Moxidectin | Advocate XL | 400/100 | mg | topical | Once | 16-Jan-18 |



TABLE A42. Adverse Events

| Group | Treatment | Patient No. | Abnormal clinical signs observed / recorded by | Date first observed   | Clinical signs still present ? | End date  | Severity of Clinical Signs | Clinical signs                                                                                                                   | Diagnosis             | Tentative / Final | Treatment needed? |
|-------|-----------|-------------|------------------------------------------------|-----------------------|--------------------------------|-----------|----------------------------|----------------------------------------------------------------------------------------------------------------------------------|-----------------------|-------------------|-------------------|
| 1     | BIOEC2015 | RVB07       | Owner                                          | 01-Feb-16             | yes                            | ongoing   | Moderate                   | Hair loss on the tail, presumed weight loss, polydipsia, increase in frequency of diarrhoea.                                     | IBD severe            | Final             | yes               |
| 1     | BIOEC2015 | RVB32       | Veterinarian                                   | approximately 18Sep17 | No                             | 24-Sep-17 | Mild                       | Lameness on right foreleg                                                                                                        | penetrating wound     | tentative         | yes               |
| 1     | BIOEC2015 | RVB35       | Owner                                          | 18-Jan-18             | No                             | 18-Jan-18 | Mild                       | Patient scavenged some food while out walking and was unwell afterwards with one episode of vomiting. No further vomiting since. | Dietary indiscretion. | Final             | No                |
| 1     | BIOEC2015 | RVB35       | Owner                                          | 10-Mar-18             | No                             | 14-Mar-18 | Mild                       | Diarrhoea - The other dog in the home also had diarrhoea. Both dogs improved without treatment.                                  | Unknown               | Final             | No                |

|   |         |       |              |                     |     |               |        |                                                                                                                                                                                         |                                                     |           |     |
|---|---------|-------|--------------|---------------------|-----|---------------|--------|-----------------------------------------------------------------------------------------------------------------------------------------------------------------------------------------|-----------------------------------------------------|-----------|-----|
| 2 | Placebo | RVB02 | Owner        | 23-Nov-15           | No  | 24-Nov-15     | Mild   | Retching twice; very quiet not himself.                                                                                                                                                 | IBD                                                 | Final     | No  |
| 2 | Placebo | RVB09 | Investigator | Reported 19/04/2016 | yes | ongoing       | severe | Worsening signs of inflammatory bowel disease. Persistent watery diarrhoea, slightly decreased appetite, severe weight loss, marked hypoalbuminemia, marked elevation in liver enzymes. | worsening of IBD +/- liver disease                  | tentative | yes |
| 2 | Placebo | RVB11 | owner        | 24-May-16           | no  | by 02/07/2016 | mild   | ear shaking                                                                                                                                                                             | otitis externa                                      | tentative | yes |
| 2 | Placebo | RVB12 | Owner        | 22-Apr-16           | No  | 29-Apr-16     | severe | vomiting, lethargy, inappetance after eating margarine                                                                                                                                  | Food indiscretion                                   | tentative | yes |
| 2 | Placebo | RVB30 | owner        | 28-Apr-17           | no  | 03-May-17     | mild   | simmer tear test performed - 18mm right eye, 20mm left eye. Left eye slightly inflamed sclera, fluorescein test was negative.                                                           | Keratoconjunctavitis sicca                          | Tentative | yes |
| 2 | Placebo | RVB30 | Owner        | 11-May-17           | no  | 11-May-17     | Mild   | Vomited bile - drank from muddy puddle the previous day                                                                                                                                 | dietary indiscretion; resolved without intervention | final     | No  |

A study investigating the efficacy of BIOEC2015 in reducing the clinical signs associated with canine inflammatory bowel disease (IBD)

FINAL

|   |         |       |       |           |    |           |      |                                                                                                                                                                       |                                                        |           |    |
|---|---------|-------|-------|-----------|----|-----------|------|-----------------------------------------------------------------------------------------------------------------------------------------------------------------------|--------------------------------------------------------|-----------|----|
| 2 | Placebo | RVB30 | Owner | 09-Jun-17 | no | 10-Jun-17 | mild | Vomited on morning of 09Jun17 and decreased appetite on 10Jun17.                                                                                                      | unknown - clinical signs resolved without intervention | tentative | no |
| 2 | Placebo | RVB31 | Owner | 13-Aug-17 | no | 13-Aug-17 | Mild | Dog found and ate faeces whilst out on a walk. The dog then regurgitated the faeces approximately 30 seconds later.                                                   | dietary indiscretion                                   | final     | no |
| 2 | Placebo | RVB34 | Owner | 30-Oct-17 | No | 30-Oct-17 | Mild | Spud was observed by owners to eat a "squeaker" from a squeaky toy. He then vomited up part of the squeaker and passed the rest in his faeces later without incident. | Ingestion of foreign body                              | final     | No |

TABLE A43. Adverse Events - treatment

| Group | Treatment | Patient No. | Date first observed   | Treatment needed? | Treatment given                                                                                                                                         | Causality                                   | Date AE recorded |
|-------|-----------|-------------|-----------------------|-------------------|---------------------------------------------------------------------------------------------------------------------------------------------------------|---------------------------------------------|------------------|
| 1     | BIOEC2015 | RVB07       | 01-Feb-16             | Yes               | Appointment made at hospital 04Feb16. Moderate weight loss. Biochemistry, haematology, and folate and cobalamine run. Prednisolone prescribed.          | Other. Worsening clinical signs of IBD.     | 02-Feb-16        |
| 1     | BIOEC2015 | RVB32       | approximately 18Sep17 | Yes               | Yes - please see concomitant treatment form                                                                                                             | Disease/condition diagnosed after enrolment | 27-Sep-17        |
| 1     | BIOEC2015 | RVB35       | 18-Jan-18             | No                |                                                                                                                                                         | Unknown                                     | 23-Jan-18        |
| 1     | BIOEC2015 | RVB35       | 10-Mar-18             | No                |                                                                                                                                                         | Unknown                                     | 19-Mar-18        |
| 2     | Placebo   | RVB02       | 23-Nov-15             | No                |                                                                                                                                                         | Other                                       | 25-Nov-15        |
| 2     | Placebo   | RVB09       | Reported 19/04/2016   | Yes               | Further investigations needed to assess liver function but needs immunosuppressant therapy for IBD. Withdrawn from trial due to worsening signs of IBD. | Other                                       | 29-Apr-16        |

|   |         |       |           |     |                                                                                                                                                                                                                     |                                             |                                                     |
|---|---------|-------|-----------|-----|---------------------------------------------------------------------------------------------------------------------------------------------------------------------------------------------------------------------|---------------------------------------------|-----------------------------------------------------|
| 2 | Placebo | RVB11 | 24-May-16 | Yes | Triz aural crystals with 4ml dexamethasone (colvasone) dispensed but not yet administered by owner. Update 16Jun16: owner confirmed at visit 7 on 16Jun16 that ear drops were not administered / used at any point. | Other                                       | recorded 26May16, signed 27/05/2016                 |
| 2 | Placebo | RVB12 | 22-Apr-16 | Yes | Omeprazole, IVFT and maropitant                                                                                                                                                                                     | Other                                       | Recorded 28Apr16, Signed by investigator 29/04/2016 |
| 2 | Placebo | RVB30 | 28-Apr-17 | Yes | Fusidic acid (Isathal eye drops), one drop applied to left eye twice daily for 7 days.                                                                                                                              | Disease/condition diagnosed after enrolment | 06-Jun-17                                           |
| 2 | Placebo | RVB30 | 11-May-17 | No  |                                                                                                                                                                                                                     | Other                                       | 01-Aug-17                                           |
| 2 | Placebo | RVB30 | 09-Jun-17 | No  |                                                                                                                                                                                                                     | Unknown                                     | 01-Aug-17                                           |
| 2 | Placebo | RVB31 | 13-Aug-17 | No  |                                                                                                                                                                                                                     | Other                                       | 25-Aug-17                                           |
| 2 | Placebo | RVB34 | 30-Oct-17 | No  |                                                                                                                                                                                                                     | Other                                       | 01-Nov-17                                           |

TABLE A44. Clinical pathology results - Group 1.

| Gro up | Treatm ent | Patient No. | Visit No. | Tissue - Microscopic description - Stomach                                                                                                                                                                                                                                                                                                                                                                                                                                                                                                                                                                                                                                                                                                                                                                                                                                                                                        | Tissue - Microscopic description - Duodenum                                                                                                                                                                                                                                                                                                                                                                                                                                                                                                                                                                                                                                                                                                                                                                                                                                                                                                         | Tissue - Microscopic description - Ileum                                                                                                                                                                                                                                                                                                                                                                                                                                                                                                                                                                                                                                                                                                                                                       | Tissue - Microscopic description - Colon                                                                                                                                                                                                                                                                                                                                                                                                                                                                                                                                                                                                                                                                                                                                                                                                |
|--------|------------|-------------|-----------|-----------------------------------------------------------------------------------------------------------------------------------------------------------------------------------------------------------------------------------------------------------------------------------------------------------------------------------------------------------------------------------------------------------------------------------------------------------------------------------------------------------------------------------------------------------------------------------------------------------------------------------------------------------------------------------------------------------------------------------------------------------------------------------------------------------------------------------------------------------------------------------------------------------------------------------|-----------------------------------------------------------------------------------------------------------------------------------------------------------------------------------------------------------------------------------------------------------------------------------------------------------------------------------------------------------------------------------------------------------------------------------------------------------------------------------------------------------------------------------------------------------------------------------------------------------------------------------------------------------------------------------------------------------------------------------------------------------------------------------------------------------------------------------------------------------------------------------------------------------------------------------------------------|------------------------------------------------------------------------------------------------------------------------------------------------------------------------------------------------------------------------------------------------------------------------------------------------------------------------------------------------------------------------------------------------------------------------------------------------------------------------------------------------------------------------------------------------------------------------------------------------------------------------------------------------------------------------------------------------------------------------------------------------------------------------------------------------|-----------------------------------------------------------------------------------------------------------------------------------------------------------------------------------------------------------------------------------------------------------------------------------------------------------------------------------------------------------------------------------------------------------------------------------------------------------------------------------------------------------------------------------------------------------------------------------------------------------------------------------------------------------------------------------------------------------------------------------------------------------------------------------------------------------------------------------------|
| 1      | BIOEC2 015 | RVB01       | 1         | F2971 Stomach (10 sections and smaller fragments, one level) the sections extend from the surface mucosa to the deeper aspects lamina propria and do not include muscularis mucosa. The epithelial surface exhibits multifocal moderate to marked attenuation. Prominent bands of fibrocytes extend through these sections, from the superficial lamina propria, to the deeper aspects of the sections, were they surround and isolate individual crypts. They are present in bands of up to 10 cells thick. Low numbers of lymphocytes and plasma cells are present within the lamina propria in these number up to 20 per 40 X (high powered) field. Low numbers of neutrophils and eosinophils are present and these number up to 5 per 40 X field. In some of the sections, more prominent lymphocyte numbers are present with up to 100 noted per 40 X field. In these areas, low numbers of intraepithelial lymphocytes are | F2972 Duodenum (10 pieces and smaller fragments, one level). These sections extend from the surface mucosa to the mid and deep lamina propria. They do not include muscularis mucosa. Villi are reduced to approximately 75% of their expected length. Villi are approximately 1 to 1 and 1/2 times increased in with. Villi are lined by tall columnar well differentiated epithelial cells. Low numbers of intraepithelial lymphocytes are present. The lamina propria contains low numbers of lymphocytes and plasma cells which occupying up to 20% of each 40 X (high powered) field. Lymphocytes and plasma cells extend to the deeper aspects of the mucosa where they surround crypts within the deep aspect of the lamina propria. Clusters of lymphocytes and plasma cells are present in up to 10 cells in small clusters in these areas. Low numbers of neutrophils and eosinophils are present within the lamina propria, with up to 5 | F2973 Ileum (10 pieces and smaller fragments, one level) the sections extend from the mucosal surface to the deep lamina propria and do not include muscularis mucosa. There is moderate to marked crush artefact throughout the sections, affecting up to 50% tissue examined. Sections are of reasonable diagnostic quality. The mucosa of these sections exhibits moderate atrophy, there is extensive villous atrophy. Epithelial cells are extensively replaced by goblet cells (mucus metaplasia). In other areas, there is multifocal mucosal erosion and attenuation and in these areas there are low numbers of attendant neutrophils, lymphocytes and plasma cells. The lamina propria is expanded by bands of well differentiated fibrocytes which extend from the surface into the | F2974 Colon (12 pieces and smaller fragments, one level) these fragments extend from the surface to the deep lamina propria and occasionally include fragments of muscularis mucosa. There is multifocal mild crush artefact affecting less than 10% of the sections. The sections are of good diagnostic quality. The surface mucosa is lined by well differentiated columnar epithelial cells. The superficial lamina propria contains low numbers of lymphocytes and plasma cells. The mucosal crypts are mildly distorted and are arranged perpendicular to the mucosal surface influenced cases. In some of the sections, there is mild increase in superficial lamina propria fibrous sites. Fibrocytes extend around crypts in bands of up to 5 cells thick. Low numbers of eosinophils and neutrophils are scattered within the |

A study investigating the efficacy of BIOEC2015 in reducing the clinical signs associated with canine inflammatory bowel disease (IBD)

FINAL

|   |               |       |   |                                                                                                                                                                                                                                                                                                                                |                                                                                                                                                                                                                                                                                                                                                                                                                                                               |                                                                                                                                                                                                                                                                                                                                                                                                                                                                                                  |                                                                                                                                                                                                                                                                                                                                                                         |
|---|---------------|-------|---|--------------------------------------------------------------------------------------------------------------------------------------------------------------------------------------------------------------------------------------------------------------------------------------------------------------------------------|---------------------------------------------------------------------------------------------------------------------------------------------------------------------------------------------------------------------------------------------------------------------------------------------------------------------------------------------------------------------------------------------------------------------------------------------------------------|--------------------------------------------------------------------------------------------------------------------------------------------------------------------------------------------------------------------------------------------------------------------------------------------------------------------------------------------------------------------------------------------------------------------------------------------------------------------------------------------------|-------------------------------------------------------------------------------------------------------------------------------------------------------------------------------------------------------------------------------------------------------------------------------------------------------------------------------------------------------------------------|
|   |               |       |   | present, with up to 10 noted per 40 X field. Occasional clusters of lymphocytes are present in nodular aggregates and these compose less than 5% of the sections examined. In one of the more fragmented sections, increased numbers of neutrophils are present within the lamina propria, with up to 20 noted per 40 X field. | of each cell type noted per 40 X field. Lacteals are within normal limit and occasionally contain low numbers of inflammatory cells (draining).                                                                                                                                                                                                                                                                                                               | deeper aspects of the lamina propria, extending around crypts in bands of up to 5 cells thick. Multifocal clusters of neutrophils are present within the lamina propria, associated with lesser numbers of lymphocytes and plasma cells. Crypts are often mildly distended with amphophilic fibrillar material, mixed with necrotic cellular debris and occasional mononuclear inflammatory cells. Within some of the sections, crypts have a contorted and convoluted appearance (hyperplasia). | collagenous stroma in these areas, with up to 10 cells noted per 40 X field.                                                                                                                                                                                                                                                                                            |
| 1 | BIOEC2<br>015 | RVB01 | 3 |                                                                                                                                                                                                                                                                                                                                | Duodenum; G39 (x1): ten sections are examined which are variably composed of mucosa and submucosa. Multifocally there is an infiltrate of low numbers of lymphocytes and plasma cells within the lamina propria. Multifocally, crypts are separated by a mild increase in proprial fibrous tissue. Rare villus lacteals are mildly dilated and there is a mild increase in epithelial goblet cells. There is no evidence of epithelial erosion or ulceration. | Ileum; G40 (x1): one section is examined which is composed of superficial villi tips. The section is too superficial to be graded. There is no evidence of epithelial erosion or ulceration in the mucosa which is present.                                                                                                                                                                                                                                                                      | Colon; G41 (x1): fifteen sections are examined which are variably composed of mucosa and submucosa. Diffusely there is a mild increase in fibrous tissue within the lamina propria. Multifocally the lamina propria is expanded by extravasated erythrocytes (acute haemorrhage, interpretation, procedural). There is no evidence of epithelial erosion or ulceration. |

|   |               |       |   |                                                                                                                                                                                                                                                                                                                                                                                                               |                                                                                                                                                                                                                                                                                                                                                                                                                                                                                                                                                                                                     |                                                                                                                                                                                                                                                                                                                                                                                        |                                                                                                                                                                                                                                                                                                               |
|---|---------------|-------|---|---------------------------------------------------------------------------------------------------------------------------------------------------------------------------------------------------------------------------------------------------------------------------------------------------------------------------------------------------------------------------------------------------------------|-----------------------------------------------------------------------------------------------------------------------------------------------------------------------------------------------------------------------------------------------------------------------------------------------------------------------------------------------------------------------------------------------------------------------------------------------------------------------------------------------------------------------------------------------------------------------------------------------------|----------------------------------------------------------------------------------------------------------------------------------------------------------------------------------------------------------------------------------------------------------------------------------------------------------------------------------------------------------------------------------------|---------------------------------------------------------------------------------------------------------------------------------------------------------------------------------------------------------------------------------------------------------------------------------------------------------------|
| 1 | BIOEC2<br>015 | RVB07 | 1 | <p>Stomach (seven pieces): The gastric mucosal biopsies have either fundic or pyloric morphology and are generally intact in the plane of section with a good density of glands. There are scattered lymphocytes and plasma cells in the superficial lamina propria and there is a little mucus and cellular debris on the mucosal surface. Neither neoplastic cells nor infective agents are recognised.</p> | <p>Duodenum (thirteen pieces): The duodenal mucosal biopsies demonstrate moderate villous atrophy and spatulation in association with heavy infiltration of the villous cores by plasma cells accompanied by smaller numbers of lymphocytes. Intravillous lymph lacteals are often dilated and a small proportion (less than 10%) of crypts are distended by exudate. There is a mild increase in goblet cell numbers in the villous epithelium and an associated mild increase in lymphocyte trafficking across that epithelium. Neither neoplastic cells nor infective agents are recognised.</p> | <p>Ileum (twelve pieces): The ileal mucosal biopsies demonstrate mild villous atrophy and moderate lymphoplasmacytic villous core infiltration in associated with marked mucosal oedema and lymph lacteal dilation. Villous goblet cell numbers are increased and there is excessive mucus on the mucosal surface. Neither neoplastic cells nor infective agents are recognised.</p>   | <p>Colon (twelve pieces): The colonic mucosal biopsies are generally intact in the plane of section and have regularly spaced crypts. There is a marginal increase in number of plasma cells and lymphocytes in the lamina propria. Neither neoplastic cells nor infective agents are recognised.</p>         |
| 1 | BIOEC2<br>015 | RVB08 | 1 | <p>F3673 (x1) Stomach; Six sections are examined, comprising gastric mucosa and scant underlying mucosa (three fundic, three pyloric). Multifocally the superficial propria is congested. Occasional pyloric glands are separated by increased fibrous connective tissue.</p>                                                                                                                                 | <p>F3674 (x1) Duodenum; Twelve sections are examined, comprising superficial fragments of duodenal mucosa and scant to absent underlying submucosa. Diffusely villous propria contains mildly increased numbers of lymphocytes and plasma cells.</p>                                                                                                                                                                                                                                                                                                                                                | <p>F3675 (x1) Ileum; Ten sections are examined, comprising ileal mucosa and scant underlying submucosa. Multifocally villi are mildly reduced in length and lined by moderately increased numbers of goblet cells (mucoïd metaplasia). Moderately increased numbers of lymphocytes are observed trafficking between enterocytes. Occasional villi contain mildly dilated (ectatic)</p> | <p>F3676 (x1) Colon; Ten sections are examined, comprising superficial fragments of colonic mucosa and scant to absent submucosa. Multifocally surface epithelium is attenuated and the subjacent propria is moderately oedematous and contains mildly increased numbers of lymphocytes and plasma cells.</p> |



|   |            |       |   |                                                                                                                                                                                                                                                                                                                                                                                                                                                                                 |                                                                                                                                                                                                                                                                                                                                                                                                                                                                                            |                                                                                                                                                                                                                 |                                                                                                                                                                                                                                                                                                                                                                                                                                                                                                                                                                |
|---|------------|-------|---|---------------------------------------------------------------------------------------------------------------------------------------------------------------------------------------------------------------------------------------------------------------------------------------------------------------------------------------------------------------------------------------------------------------------------------------------------------------------------------|--------------------------------------------------------------------------------------------------------------------------------------------------------------------------------------------------------------------------------------------------------------------------------------------------------------------------------------------------------------------------------------------------------------------------------------------------------------------------------------------|-----------------------------------------------------------------------------------------------------------------------------------------------------------------------------------------------------------------|----------------------------------------------------------------------------------------------------------------------------------------------------------------------------------------------------------------------------------------------------------------------------------------------------------------------------------------------------------------------------------------------------------------------------------------------------------------------------------------------------------------------------------------------------------------|
|   |            |       |   |                                                                                                                                                                                                                                                                                                                                                                                                                                                                                 |                                                                                                                                                                                                                                                                                                                                                                                                                                                                                            | lacteals. Multifocally the propria is markedly expanded by enlarged lymphoid follicles and villi contain high numbers of lymphocytes and plasma cells admixed with moderately increased numbers of eosinophils. |                                                                                                                                                                                                                                                                                                                                                                                                                                                                                                                                                                |
| 1 | BIOEC2 015 | RVB08 | 3 | G539(x1) Stomach; Eight fragments of stomach are examined, comprising six with pyloric and two with fundic mucosa and scant underlying propria. Multifocally, occasional glands are separated by increased connective tissue. Multifocally there are occasional clusters of lymphocytes and plasma cells within the superficial propria that do not infiltrate glandular structures. There are mildly increased lymphoid follicles occupying up to 10% of pyloric biopsy areas. | G540(x1) Duodenum; Three fragments are examined, comprising poorly orientated duodenal mucosa and scant underlying propria. There are mildly increased numbers of lymphocytes and plasma cells trafficking between villous epithelium. Multifocally the subjacent propria contains mild to moderately increased numbers of lymphocytes and plasma cells admixed with fewer eosinophils. Occasional crypts are dilated by eosinophilic cellular and karyorrhectic debris (crypt abscesses). |                                                                                                                                                                                                                 | G541(x1) Colon; Eight fragments of colonic mucosa and scant underlying propria are examined. Multifocally surface enterocytes are mildly attenuated, while crypt enterocytes are mildly hyperplastic, with accompanying mild distortion of crypt architecture. Occasionally the superficial propria is mildly expanded (oedematous) or contains extravasated erythrocytes (haemorrhage, possibly procedural related). There are mildly increased numbers of lymphocytes and plasma cells with occasional clusters of up to ten neutrophils within the propria. |
| 1 | BIOEC2 015 | RVB13 | 1 | Stomach, G1670 x1. 8 sections are examined which comprise                                                                                                                                                                                                                                                                                                                                                                                                                       | Duodenum, G1671 x1. 12 sections are examined which                                                                                                                                                                                                                                                                                                                                                                                                                                         | Ileum, G1672 x 1: 10 sections are examined which                                                                                                                                                                | Colon, G1673 x 1: 12 sections are examined which                                                                                                                                                                                                                                                                                                                                                                                                                                                                                                               |

A study investigating the efficacy of BIOEC2015 in reducing the clinical signs associated with canine inflammatory bowel disease (IBD)

FINAL

|   |           |       |   |                                                                                                                                                                                                                                                                                                                                                                                                                                                                                                                    |                                                                                                                                                                                                                                                                                                                                                                                                                                                                   |                                                                                                                                                                                                                                                                                                                                                                                                                                                                                                |                                                                                                                                                                                                                                                                                                                                                                                                                     |
|---|-----------|-------|---|--------------------------------------------------------------------------------------------------------------------------------------------------------------------------------------------------------------------------------------------------------------------------------------------------------------------------------------------------------------------------------------------------------------------------------------------------------------------------------------------------------------------|-------------------------------------------------------------------------------------------------------------------------------------------------------------------------------------------------------------------------------------------------------------------------------------------------------------------------------------------------------------------------------------------------------------------------------------------------------------------|------------------------------------------------------------------------------------------------------------------------------------------------------------------------------------------------------------------------------------------------------------------------------------------------------------------------------------------------------------------------------------------------------------------------------------------------------------------------------------------------|---------------------------------------------------------------------------------------------------------------------------------------------------------------------------------------------------------------------------------------------------------------------------------------------------------------------------------------------------------------------------------------------------------------------|
|   |           |       |   | <p>surface epithelium and lamina propria extending to the muscularis mucosa, there is mild crush artefact and they are of good diagnostic quality. There is multifocal mild attenuation of surface epithelium and one section is overlain by a dense mat of necrotic debris and fibrin. The lamina propria is moderately infiltrated with lymphocytes and plasma cells and moderately irregular glands are moderately separated with fibrous connective tissue. There is marked lympho-follicular hyperplasia.</p> | <p>comprise surface epithelium and lamina propria extending to the muscularis mucosa, there is minimal crush artefact and 4 are well oriented for examination, they are of good diagnostic quality. There are mildly increased numbers of intraepithelial lymphocytes and there is mild shortening and blunting of villous profiles. The lamina propria is moderately infiltrated with lymphocytes and plasma cells which separate crypts.</p>                    | <p>comprise surface epithelium and lamina propria extending to the muscularis mucosa, there is minimal crush artefact and 5 are well oriented for examination, they are of good diagnostic quality. There is mild villous stunting and a moderate increase in intraepithelial lymphocytes and a mild increase in goblet cells. The surface is covered with copious mucus admixed with inflammatory debris. The lamina propria is moderately infiltrated with lymphocytes and plasma cells.</p> | <p>comprise surface epithelium and lamina propria extending to the muscularis mucosa, there is minimal crush artefact and they are of good diagnostic quality. There is a mild increase in lamina propria lymphocytes and plasma cells, otherwise the sections are within normal limits.</p>                                                                                                                        |
| 1 | BIOEC2015 | RVB13 | 3 | <p>G2615: stomach (10 sections) these sections extend from the surface epithelium to the deep lamina propria and often include muscularis mucosa. There is multifocal moderate crush artefact affecting up to 30% of the sections. The sections are of good diagnostic quality. The surface is lined by a well differentiated tall columnar epithelial layer which shows multifocal marked attenuation. Multifocally, the surface</p>                                                                              | <p>G2616: duodenum (12 sections and smaller fragments) these sections of small intestinal mucosa extend from the surface epithelium, often including deep lamina propria and occasionally muscularis mucosa. There is multifocal mild crush artefact affecting up to 50% of the sections. Sections of good diagnostic quality. Multiple villi profiles are evident and these show marked stunting, blunting and fusion. Villi are lined by tall columnar well</p> | <p>G2617: ileum (12 sections and smaller fragments) these are sections of small intestine and extend from the surface epithelium to the deep lamina propria, often including muscularis mucosa. There is multifocal mild crush artefact affecting less than 10% of the sections. Sections are of good diagnostic quality. Villi show multifocal= marked stunting, blunting and fusion. They are</p>                                                                                            | <p>G2618: Colon (10 sections and smaller fragments) the sections consist of colonic mucosa, extending from the surface epithelium to the deep lamina propria, and often including muscularis mucosa. There is multifocal mild crush artefact. The sections are of good diagnostic quality. There is multifocal mild attenuation of the surface epithelium. Multifocally, the epithelium is absent (ulceration).</p> |

|   |           |       |   |                                                                                                                                                                                                                                                                                                                                                                                                                                                                                                                                                                                                                                                                                                                       |                                                                                                                                                                                                                                                                                                                                                                                                                                                                                                                                                                       |                                                                                                                                                                                                                                                                                                                                                                                                                                                                                                                                                                                                                                              |                                                                                                                                                                                                                                                                                                                                                                                                                                                                                                                                                                                                                                                                                                                                      |
|---|-----------|-------|---|-----------------------------------------------------------------------------------------------------------------------------------------------------------------------------------------------------------------------------------------------------------------------------------------------------------------------------------------------------------------------------------------------------------------------------------------------------------------------------------------------------------------------------------------------------------------------------------------------------------------------------------------------------------------------------------------------------------------------|-----------------------------------------------------------------------------------------------------------------------------------------------------------------------------------------------------------------------------------------------------------------------------------------------------------------------------------------------------------------------------------------------------------------------------------------------------------------------------------------------------------------------------------------------------------------------|----------------------------------------------------------------------------------------------------------------------------------------------------------------------------------------------------------------------------------------------------------------------------------------------------------------------------------------------------------------------------------------------------------------------------------------------------------------------------------------------------------------------------------------------------------------------------------------------------------------------------------------------|--------------------------------------------------------------------------------------------------------------------------------------------------------------------------------------------------------------------------------------------------------------------------------------------------------------------------------------------------------------------------------------------------------------------------------------------------------------------------------------------------------------------------------------------------------------------------------------------------------------------------------------------------------------------------------------------------------------------------------------|
|   |           |       |   | epithelium is absent (ulceration). Mild to moderately increased numbers of intraepithelial lymphocytes are present, with up to 30 cells noted per 40 X field in some areas. The underlying lamina propria contains high numbers of lymphocytes and plasma cells. These occupying up to 60% of the lamina propria per 40 X field. There are accompanied by low numbers of neutrophils and eosinophils and lesser histiocytes, which number up to 10 cells each per 40 X field. Mild diffuse fibrosis is present, with slender bands of fibrous connective tissue extending around gastric glands, in bands of up to 5 cells thick. Multifocal lymphoid aggregates are present and occupying up to 40% of the biopsies. | differentiated epithelial cells. Occasional segmental mild increases in intraepithelial lymphocytes is noted. There is diffuse mild to moderate increase in lamina propria lymphocytes and plasma cells, which occupying up to 60% of the lamina propria in some areas. These are accompanied by clusters of neutrophils and eosinophils, numbering up to 5 cells each per 40 X field. Low numbers of large granular lymphocytes are present in intraepithelial areas. Lacteal is are mildly ectatic, measure approximately one third of the diameter of the villous. | lined by tall columnar well differentiated epithelial cells. There is diffuse mild increase in intraepithelial lymphocytes. Lamina propria lymphocytes and plasma cells are a diffusely moderately increased in number, occupying up to 60% of the lamina propria in some fields. There are accompanied by high numbers of eosinophils, which number up to 20 cells per 40 X field, and lesser numbers of neutrophils, numbering up to 10 cells per 40 X field. There is multifocal marked lymphoid hyperplasia. Lymphoid follicles appear well differentiated, with prominent germinal centres containing large numbers of polygonal cells. | Subjacent to areas of attenuation, there are clusters of neutrophils, numbering up to 10 cells per 40 X field. There is diffuse mild increase in lamina propria macrophages, which number up to 20 cells per 40 X field. Frequent large granular lymphocytes are evident within intraepithelial areas. There is diffuse mild to moderate increase in lamina propria lymphocytes and plasma cells, often noted in clusters between the crypts in the deeper lamina propria. Crypts are generally orientated perpendicular to the mucosal surface. Occasionally, there are moderately to markedly convoluted and lined by several layers of epithelial cells. The occasionally mildly distended with small amounts of mucoid material. |
| 1 | BIOEC2015 | RVB16 | 1 | G2168<br>Stomach (12 sections and smaller fragments) the sections consist of gastric mucosa and extend from the surface epithelium and often include the muscularis mucosa. There is multifocal mild crush                                                                                                                                                                                                                                                                                                                                                                                                                                                                                                            | G2169<br>Duodenum (12 sections and some smaller fragments) these sections extend from the surface epithelium and occasionally include the muscularis mucosa. The majority of the sections extend to mid lamina propria.                                                                                                                                                                                                                                                                                                                                               | G2170<br>Ileum (10 sections and smaller fragments) the sections extend from the surface mucosa and include lamina propria. There is multifocal mild crush artefact. There is                                                                                                                                                                                                                                                                                                                                                                                                                                                                 | G2171<br>Colon (sections and some smaller fragments) the sections consist of colonic mucosa and extend from the surface epithelium to the deep lamina propria, or occasionally including                                                                                                                                                                                                                                                                                                                                                                                                                                                                                                                                             |

|  |  |  |                                                                                                                                                                                                                                                                                                                                                                                                                                                                                                                                                                                                                                                                                                                                                                                                                                                                                                                                                                                                                                                 |                                                                                                                                                                                                                                                                                                                                                                                                                                                                                                                                                                                                                                                                                                                                                                                                                                                                                                                                                                                                                                                                                |                                                                                                                                                                                                                                                                                                                                                                                                                                                                                                                                                                                                                   |                                                                                                                                                                                                                                                                                                                                                                                                                                                                                                                                                                                                                                                                                                                                                                                                            |
|--|--|--|-------------------------------------------------------------------------------------------------------------------------------------------------------------------------------------------------------------------------------------------------------------------------------------------------------------------------------------------------------------------------------------------------------------------------------------------------------------------------------------------------------------------------------------------------------------------------------------------------------------------------------------------------------------------------------------------------------------------------------------------------------------------------------------------------------------------------------------------------------------------------------------------------------------------------------------------------------------------------------------------------------------------------------------------------|--------------------------------------------------------------------------------------------------------------------------------------------------------------------------------------------------------------------------------------------------------------------------------------------------------------------------------------------------------------------------------------------------------------------------------------------------------------------------------------------------------------------------------------------------------------------------------------------------------------------------------------------------------------------------------------------------------------------------------------------------------------------------------------------------------------------------------------------------------------------------------------------------------------------------------------------------------------------------------------------------------------------------------------------------------------------------------|-------------------------------------------------------------------------------------------------------------------------------------------------------------------------------------------------------------------------------------------------------------------------------------------------------------------------------------------------------------------------------------------------------------------------------------------------------------------------------------------------------------------------------------------------------------------------------------------------------------------|------------------------------------------------------------------------------------------------------------------------------------------------------------------------------------------------------------------------------------------------------------------------------------------------------------------------------------------------------------------------------------------------------------------------------------------------------------------------------------------------------------------------------------------------------------------------------------------------------------------------------------------------------------------------------------------------------------------------------------------------------------------------------------------------------------|
|  |  |  | <p>artefact affecting up to 20% of the sections. Sections are of good diagnostic quality. The mucosa is lined by tall columnar epithelial cells. There is multifocal mild epithelial attenuation. There is multifocal moderate accumulation of surface mucus. Dense clusters of spiral 20 µm long bacteria are present within the surface mucus. There are low numbers of intraepithelial lymphocytes with 2 to 3 noted per 40 X field. Lymphoid follicles are present in the deep mucosa and account for up to 10% of the biopsy. The lamina propria is diffusely mildly expanded by clusters of lymphocytes and plasma cells. These occupying up to 60% of the lamina propria in some fields. The superficial lamina propria contains high numbers of parietal and chief cells. There is multifocal mild atrophy of these glands. In general, they are well differentiated. Multifocally, there is moderate increase in lamina propria fibrosis. In affected areas, bands of fibrocytes up to 5 cells thick extending between the glands.</p> | <p>Crypt architecture is evident in one of the sections. Villi villous morphology is often difficult to appreciate, however, when present in longitudinal sections, villi often moderately blunted to markedly pigmented and stunted. There is extensive villous fusion. Villi are generally lined by tall columnar epithelium. There is multifocal moderate epithelial attenuation. Expected numbers of intraepithelial lymphocytes are present. There is a mild diffuse increase in lamina propria lymphocytes, occupying up to 55% of each 40 X field. Clusters of lymphocytes and plasma cells extend between crypts and groups of up to 12 to 20 cells. Clusters of eosinophils are noted in groups of up to 20 per 40 X field. These are accompanied by approximately equal numbers of neutrophils, noted both within the superficial and deep lamina propria. There is multifocal moderate hyperplasia of the crypt epithelium with distortion of the epithelial cells and loss of perpendicular arrangement to the surface. Lacteals are present and appear within</p> | <p>multifocal mild crush artefact affecting up to 10% of the sections. Sections are of good diagnostic quality. There is multifocal moderate stunting and fusion. Moderately increased numbers of intraepithelial lymphocytes are present. There is diffuse moderate increase in lamina propria lymphocytes and plasma cells, which occupy up to 60% of each 40 X field in some areas. Low numbers of lymphocytes of neutrophils and eosinophils are present in the lamina propria, clusters of up to 20 per 40 X field in some areas. Is occasional clusters of macrophages are also present lamina propria.</p> | <p>muscularis mucosa. There is multifocal mild surface epithelial attenuation. Occasional areas of erosion and ulceration are noted. The lamina propria is expanded by moderately increased numbers of lymphocytes and plasma cells, which occupying up to 50% to occasionally 60% of the each 40 X field. occasional dense aggregates of lymphocytes and plasma cells are arranged in follicles within the sections. Epithelial cells lining crypts are generally well differentiated. There is multifocal mild crypt ectasia. Occasionally, markedly tortuous crypts are noted loss of perpendicular arrangement to the surface mucosa. Occasional neutrophils are noted within the lamina propria with 1 to 2 noted per 40 X field. Mildly accumulations of surface mucus are present in some areas</p> |
|--|--|--|-------------------------------------------------------------------------------------------------------------------------------------------------------------------------------------------------------------------------------------------------------------------------------------------------------------------------------------------------------------------------------------------------------------------------------------------------------------------------------------------------------------------------------------------------------------------------------------------------------------------------------------------------------------------------------------------------------------------------------------------------------------------------------------------------------------------------------------------------------------------------------------------------------------------------------------------------------------------------------------------------------------------------------------------------|--------------------------------------------------------------------------------------------------------------------------------------------------------------------------------------------------------------------------------------------------------------------------------------------------------------------------------------------------------------------------------------------------------------------------------------------------------------------------------------------------------------------------------------------------------------------------------------------------------------------------------------------------------------------------------------------------------------------------------------------------------------------------------------------------------------------------------------------------------------------------------------------------------------------------------------------------------------------------------------------------------------------------------------------------------------------------------|-------------------------------------------------------------------------------------------------------------------------------------------------------------------------------------------------------------------------------------------------------------------------------------------------------------------------------------------------------------------------------------------------------------------------------------------------------------------------------------------------------------------------------------------------------------------------------------------------------------------|------------------------------------------------------------------------------------------------------------------------------------------------------------------------------------------------------------------------------------------------------------------------------------------------------------------------------------------------------------------------------------------------------------------------------------------------------------------------------------------------------------------------------------------------------------------------------------------------------------------------------------------------------------------------------------------------------------------------------------------------------------------------------------------------------------|

|   |           |       |   |                                                                                                                                                                                                                                                                                                                                                                                                                                                                                                     |                                                                                                                                                                                                                                                                                                                                                                                                                                                                                                                                                                      |                                                                                                                                                                                                                                                                                                                                                                                                                                                        |                                                                                                                                                                                                                                                                                                                                                                                                                   |
|---|-----------|-------|---|-----------------------------------------------------------------------------------------------------------------------------------------------------------------------------------------------------------------------------------------------------------------------------------------------------------------------------------------------------------------------------------------------------------------------------------------------------------------------------------------------------|----------------------------------------------------------------------------------------------------------------------------------------------------------------------------------------------------------------------------------------------------------------------------------------------------------------------------------------------------------------------------------------------------------------------------------------------------------------------------------------------------------------------------------------------------------------------|--------------------------------------------------------------------------------------------------------------------------------------------------------------------------------------------------------------------------------------------------------------------------------------------------------------------------------------------------------------------------------------------------------------------------------------------------------|-------------------------------------------------------------------------------------------------------------------------------------------------------------------------------------------------------------------------------------------------------------------------------------------------------------------------------------------------------------------------------------------------------------------|
|   |           |       |   | Occasional clusters of neutrophils are scattered within the superficial lamina propria. In occasional fields, dense clusters of intraepithelial lymphocytes are present. A number up to 10 per 40 X field in these areas. Minimal disruption of the underlying basement membrane is noted.                                                                                                                                                                                                          | normal limits. Occasional mild lymphatic lacteal ectasia is noted with occasional lacteal measuring = up to 50% of the diameter of the associated villous. occasional well formed lymphoid follicles are present within the superficial mucosa. Occasional areas of mucosal fibrosis noted with slender bands of fibrous connective tissue extending between the crypts. there is focal crush artefact in this area, with mild anisokaryosis and anisocytosis in the crypt epithelial cell population. There is multifocal mild crush artefact present in this area. |                                                                                                                                                                                                                                                                                                                                                                                                                                                        |                                                                                                                                                                                                                                                                                                                                                                                                                   |
| 1 | BIOEC2015 | RVB16 | 3 | G3084 (x1) Stomach (10 sections): The sections consist of pyloric and fundic gastric mucosa and extend from the surface epithelium to the lamina propria and does not include muscularis mucosa. There is multifocal mild crush artefact. The sections are variably orientated and are of good diagnostic quality. The mucosa is lined by tall columnar epithelial cells with no evidence of attenuation or degeneration. There is minimal surface mucus and spiral bacteria are not evident at the | G3085 (x1) Duodenum (8 sections and smaller fragments): The sections extend from the surface epithelium to the mid to deep lamina propria and do not include muscularis mucosa. Sections are variably orientated and there is mild to moderate crushing artefact. The samples are of adequate diagnostic quality. Where longitudinally sectioned villi are mildly stunted with wide bases. The villous epithelium is present in a single layer of tall columnar cells and erosion or ulceration is not observed. There is an                                         | G3086 (x1) Ileum (9 sections and smaller fragments): The sections extend from the surface epithelium and include lamina propria, with one section including muscularis mucosa. There is multifocal mild to moderate crush artefact. Sections are of good diagnostic quality. Where longitudinally sectioned there is mild stunting of villi. On the mucosal surface are bacterial colonies admixed with increased volumes of mucus. There is a diffuse | G3087 (x1) Colon (8 sections): The sections extend from the surface epithelium to the deep lamina propria, frequently including muscularis mucosa. A single layer of columnar epithelium covers the surface and crypts and attenuation, erosion or ulceration is not noted. There is mild goblet cell hyperplasia with an excess of surface mucus present with mild thickening and distortion of crypts. There is |

|   |           |       |   |                                                                                                                                                                                                                                                                                                                                                                                                                                                                                                                                                                                                                                                                  |                                                                                                                                                                                                                                                                                                                                                                                                                                                                                                                                                                                           |                                                                                                                                                                                                                                                                                                                                                  |                                                                                                                                                                                                                                                                                                                                                  |
|---|-----------|-------|---|------------------------------------------------------------------------------------------------------------------------------------------------------------------------------------------------------------------------------------------------------------------------------------------------------------------------------------------------------------------------------------------------------------------------------------------------------------------------------------------------------------------------------------------------------------------------------------------------------------------------------------------------------------------|-------------------------------------------------------------------------------------------------------------------------------------------------------------------------------------------------------------------------------------------------------------------------------------------------------------------------------------------------------------------------------------------------------------------------------------------------------------------------------------------------------------------------------------------------------------------------------------------|--------------------------------------------------------------------------------------------------------------------------------------------------------------------------------------------------------------------------------------------------------------------------------------------------------------------------------------------------|--------------------------------------------------------------------------------------------------------------------------------------------------------------------------------------------------------------------------------------------------------------------------------------------------------------------------------------------------|
|   |           |       |   | <p>mucosal surface.</p> <p>Low numbers of intraepithelial lymphocytes are present, with 1-2 observed per high power field (400x). There is diffuse expansion of lamina propria by blood vessels (congestion) with a mild, diffuse increase in the number of lymphocytes and plasma cells. Cellular debris is noted within the lumen of a single gastric gland (gland abscess). Lymphoid follicles are present within the deep mucosa of multiple sections, accounting for &lt;10% of the biopsy sections. There is a small to moderate amount of fibrous connective tissue (fibrosis) separating the gastric glands of the fundus in the superficial mucosa.</p> | <p>increased proportion of goblet cells within the surface epithelium. Intraepithelial cells are present at 2-3 per high power field (400x). The superficial lamina propria blood vessels are expanded by red blood cells (congestion) and crypts are occasionally distended with mucus, with rare crypts containing = fragments of deeply basophilic material (mineral). There is a mild increase in lymphocytes and plasma cells within the lamina propria and neutrophils are observed within vessels. Areas of lymphofollicular hyperplasia are present within multiple sections.</p> | <p>mild increase in lamina propria lymphocytes and plasma cells. Neutrophils, eosinophils or macrophages are not observed.</p>                                                                                                                                                                                                                   | <p>a mild increase in lamina propria lymphocytes and plasma cells with multifocally mildly increased separation of crypts by fibrous tissue.</p>                                                                                                                                                                                                 |
| 1 | BIOEC2015 | RVB18 | 1 | <p>G2372 (×1 ): 13 fundic and pyloric gastric biopsies are examined. The epithelium lining the sections of fundus is diffusely intact and is multifocally infiltrated by scattered lymphocytes at a frequency of up to 2 cells per high power field stretch of epithelium. Gastric pits are lined by well-differentiated chief and parietal cells and towards the luminal surface</p>                                                                                                                                                                                                                                                                            | <p>G2373 (×1 ): 12 biopsies of duodenal mucosa are examined. Mucosal villi lining these sections are tall and slender, and are lined by tall columnar epithelial cells with expected numbers of goblet cells present. Intraepithelial lymphocytes are present at a frequency of up to 10 cells per high-power field stretch. Lymphocytes and plasma cells are present within the</p>                                                                                                                                                                                                      | <p>G2374 (x1): 11 biopsies of ileal mucosa are examined. Within these sections, = mucosal villi are tall and slender and are lined by tall columnar epithelial cells with expected numbers of goblet cells present. Increased numbers of intraepithelial lymphocytes are identified at a frequency of between 20 to 30 cells per HPF stretch</p> | <p>G2375 (x1): 10 colonic biopsies are examined. The epithelium overlying these sections is diffusely intact and is formed tall enterocytes and lesser numbers of goblet cells. Occasional intraepithelial lymphocytes are present, at a frequency of &lt;1 cell per high power field stretch. Infiltrating the lamina propria are increased</p> |

|  |  |  |                                                                                                                                                                                                                                                                                                                                                                                                                                                                                                                                                                                                                                                                                                                                                                                                                                                                                                                                                                                |                                                                                                                                                                                                                                                                                                         |                                                                                                                                                                                                                                                                                                                                                                                                                                                                                                                                                                                                        |                                                                                                                                                                                                                                                                                                                                                                                                                                       |
|--|--|--|--------------------------------------------------------------------------------------------------------------------------------------------------------------------------------------------------------------------------------------------------------------------------------------------------------------------------------------------------------------------------------------------------------------------------------------------------------------------------------------------------------------------------------------------------------------------------------------------------------------------------------------------------------------------------------------------------------------------------------------------------------------------------------------------------------------------------------------------------------------------------------------------------------------------------------------------------------------------------------|---------------------------------------------------------------------------------------------------------------------------------------------------------------------------------------------------------------------------------------------------------------------------------------------------------|--------------------------------------------------------------------------------------------------------------------------------------------------------------------------------------------------------------------------------------------------------------------------------------------------------------------------------------------------------------------------------------------------------------------------------------------------------------------------------------------------------------------------------------------------------------------------------------------------------|---------------------------------------------------------------------------------------------------------------------------------------------------------------------------------------------------------------------------------------------------------------------------------------------------------------------------------------------------------------------------------------------------------------------------------------|
|  |  |  | <p>are separated by small amounts of oedema and small proliferations of fibrous connective tissue. Within the deeper aspects of the mucosa, fundic glands are separated by 1-2 layers of fibroblasts. Low numbers of lymphocytes and plasma cells multifocally infiltrate the lamina propria, at a frequency of up to 20 cells per high power field. Lymphoid aggregates occupy less than 10% of the biopsy area. The epithelium lining the sections of pylorus is diffusely intact and is multifocally infiltrated by scattered lymphocytes at a frequency of up to 2 cells per high power field stretch of epithelium. Pyloric glands are individualised by expected amounts of collagenous connective tissue. Infiltrating this fibrous stroma are expected numbers of lymphocytes and plasma cells at a frequency of up to 20 cells per high power field. Neutrophils and eosinophils are not identified. Lymphoid aggregates occupy less than 10% of the biopsy area.</p> | <p>lamina propria in expected numbers, representing up to 25% of the total tissue area with 1-2 lymphocytes and plasma cells present per intercrypt space. Eosinophils are present at a frequency of less than 2 per high-power field. Lacteals represent less than 25% of the total villous width.</p> | <p>of epithelium. There is prominent dilation of central lacteals and these lacteals occupy up to 75% of the villous width. Intestinal crypts are well organised and separated by expected amounts of fibrovascular connective tissue. Infiltrating the lamina propria are increased numbers of eosinophils at a frequency of between 10 to 20 cells per HPF and increased numbers of lymphocytes and plasma cells also infiltrate the lamina propria at a frequency of between 20 to 30 cells per HPF. Scattered neutrophils are also identified at a frequency of between 5 to 10 cells per HPF.</p> | <p>numbers of eosinophils at a frequency of between 10 to 20 cells per HPF and these cells are accompanied by mildly increased numbers of lymphocytes and plasma cells which filled the inter-crypt space but do not disrupt normal perpendicular crypt architecture. Scattered neutrophils are also identified at a frequency of between 5 to 10 cells per HPF. The epithelium lining the colonic crypts is mildly hyperplastic.</p> |
|--|--|--|--------------------------------------------------------------------------------------------------------------------------------------------------------------------------------------------------------------------------------------------------------------------------------------------------------------------------------------------------------------------------------------------------------------------------------------------------------------------------------------------------------------------------------------------------------------------------------------------------------------------------------------------------------------------------------------------------------------------------------------------------------------------------------------------------------------------------------------------------------------------------------------------------------------------------------------------------------------------------------|---------------------------------------------------------------------------------------------------------------------------------------------------------------------------------------------------------------------------------------------------------------------------------------------------------|--------------------------------------------------------------------------------------------------------------------------------------------------------------------------------------------------------------------------------------------------------------------------------------------------------------------------------------------------------------------------------------------------------------------------------------------------------------------------------------------------------------------------------------------------------------------------------------------------------|---------------------------------------------------------------------------------------------------------------------------------------------------------------------------------------------------------------------------------------------------------------------------------------------------------------------------------------------------------------------------------------------------------------------------------------|

|   |               |       |   |                                                                                                                                                                                                                                                                                                                                                                        |                                                                                                                                                                                                                                                                                                                                                                                                                                                                               |                                                                                                                                                                                                                                                                                            |                                                                                                                                                                                                                                                                                                                                                                                                                                            |
|---|---------------|-------|---|------------------------------------------------------------------------------------------------------------------------------------------------------------------------------------------------------------------------------------------------------------------------------------------------------------------------------------------------------------------------|-------------------------------------------------------------------------------------------------------------------------------------------------------------------------------------------------------------------------------------------------------------------------------------------------------------------------------------------------------------------------------------------------------------------------------------------------------------------------------|--------------------------------------------------------------------------------------------------------------------------------------------------------------------------------------------------------------------------------------------------------------------------------------------|--------------------------------------------------------------------------------------------------------------------------------------------------------------------------------------------------------------------------------------------------------------------------------------------------------------------------------------------------------------------------------------------------------------------------------------------|
| 1 | BIOEC2<br>015 | RVB18 | 3 | <p>Stomach (one section): 11 sections of fundic and pyloric mucosa are examined. Infiltrating the lamina propria are moderately increased numbers of lymphocytes and plasma cells which are supported by increased proliferations of fibrovascular connective tissue. Together these changes cause separation of the gastric glands</p>                                | <p>Duodenum (one section): 12 sections of duodenal mucosa are examined. The villi overlying these sections are tall and slender and are lined by intact epithelium. Infiltrating the lamina propria are mildly increased numbers of lymphocytes and plasma cells.</p>                                                                                                                                                                                                         | <p>Ileum (one section): 4 sections of ileal mucosa are examined. Increased numbers of lymphocytes and plasma cells multifocally infiltrate the lamina propria and are variably separated by moderate amounts of oedema. Overlying the epithelial surface are moderate amounts of mucin</p> | <p>Colon (one section): 13 sections of colonic mucosa are examined. The epithelium overlying these sections is variably eroded and infiltrating the underlying lamina propria are numerous eosinophils admixed with fewer lymphocytes, plasma cells and scattered neutrophils. These inflammatory infiltrates are separated by moderate amounts of oedema. Goblet cells lining the mucosal glands are almost entirely devoid of mucus.</p> |
| 1 | BIOEC2<br>015 | RVB27 | 1 | <p>H686, stomach x1. Eleven sections are examined, they extend from the surface epithelium to the muscularis mucosa, there is minimal crush artefact and they are of good diagnostic quality. There is a mild increase in mucosal fibrous connective tissue with nesting of adjacent glands. There is a mild increase in superficial lymphocytes and plasma cells.</p> | <p>H687, duodenum x1. Thirteen sections are examined, they extend from the surface epithelium to the muscularis mucosa, their orientation is adequate and there is minimal crush artefact, they are of good diagnostic quality. Sample orientation hinders examination of villous morphology but where this is appreciable, they are within normal limits. The villous lamina propria is mildly infiltrated by low numbers of plasma cells and lymphocytes. Otherwise the</p> |                                                                                                                                                                                                                                                                                            | <p>H688, colon x1. Thirteen sections are examined, they extend from the surface epithelium to the muscularis mucosa, the orientation is good and there is minimal crush artefact, they are of excellent diagnostic quality. There is rare attenuation of the surface epithelium. Multifocally, the lamina propria is infiltrated by low numbers of lymphocytes and plasma cells.</p>                                                       |



|   |            |       |   |                                                                                                                                                                                                                                                                                                                                                                                                                                                                                                                                                                                                                                                                                                                                                                                                                                   |                                                                                                                                                                                                                                                                                                                                                                                                                                                                                                                                                                                                                                                                                                                                                                                                                                |                                              |                                                                                                                                                                                                                                                                                                                                                                             |
|---|------------|-------|---|-----------------------------------------------------------------------------------------------------------------------------------------------------------------------------------------------------------------------------------------------------------------------------------------------------------------------------------------------------------------------------------------------------------------------------------------------------------------------------------------------------------------------------------------------------------------------------------------------------------------------------------------------------------------------------------------------------------------------------------------------------------------------------------------------------------------------------------|--------------------------------------------------------------------------------------------------------------------------------------------------------------------------------------------------------------------------------------------------------------------------------------------------------------------------------------------------------------------------------------------------------------------------------------------------------------------------------------------------------------------------------------------------------------------------------------------------------------------------------------------------------------------------------------------------------------------------------------------------------------------------------------------------------------------------------|----------------------------------------------|-----------------------------------------------------------------------------------------------------------------------------------------------------------------------------------------------------------------------------------------------------------------------------------------------------------------------------------------------------------------------------|
|   |            |       |   |                                                                                                                                                                                                                                                                                                                                                                                                                                                                                                                                                                                                                                                                                                                                                                                                                                   | sections are morphologically unremarkable.                                                                                                                                                                                                                                                                                                                                                                                                                                                                                                                                                                                                                                                                                                                                                                                     |                                              |                                                                                                                                                                                                                                                                                                                                                                             |
| 1 | BIOEC2 015 | RVB29 | 1 | H956 (x1) Stomach (9 sections): The samples consist of 3 sections of pyloric and 6 sections of fundic gastric mucosa and extend from the surface epithelium to the lamina propria. There is multifocal mild crush artefact and acute haemorrhage presumed to be procedure related. The sections are variably orientated and are of good diagnostic quality. Within fundic sections the surface epithelium is multifocally and extensively flattened (attenuated) and there is increased separation of gastric glands by loosely arranged fibrous tissue (oedema, fibrosis and atrophy). Affecting both fundic and pyloric sections there is a diffuse increase in lamina propria lymphocytes and plasma cells and low numbers of neutrophils are observed. Intraepithelial lymphocyte numbers are considered within normal limits | H957 (x1) Duodenum (12 sections and fragments): The sections extend from the surface epithelium to the mid to deep lamina propria and rarely contain fragments of muscularis mucosae. Prominent gut associated lymphoid tissue is present within the sections. Sections are variably orientated and there is mild to moderate crushing artefact. The samples are of good diagnostic quality. Villi appear of adequate length where longitudinally sectioned and the villous epithelium is present in a single layer of tall columnar cells. No erosions or ulcerations are observed. Intraepithelial lymphocytes are present within normal limits. There is a moderate increase in lymphocytes and plasma cells within the lamina propria and occasional neutrophils are present. Central lymphatics are within normal limits. |                                              | H958 (x1) Colon (13 sections): The sections extend from the surface epithelium to the deep lamina propria, occasionally including the muscularis mucosa. The sections are variably orientated and of good diagnostic quality. The surface epithelium is intact and the number of lymphocytes and plasma cells within the lamina propria is considered within normal limits. |
| 1 | BIOEC2 015 | RVB29 | 3 |                                                                                                                                                                                                                                                                                                                                                                                                                                                                                                                                                                                                                                                                                                                                                                                                                                   |                                                                                                                                                                                                                                                                                                                                                                                                                                                                                                                                                                                                                                                                                                                                                                                                                                |                                              |                                                                                                                                                                                                                                                                                                                                                                             |
| 1 | BIOEC2 015 | RVB32 | 1 | H1415, stomach x1. Fourteen sections of pyloric and gastric                                                                                                                                                                                                                                                                                                                                                                                                                                                                                                                                                                                                                                                                                                                                                                       | H1416, duodenum x1. Eight sections are examined, they                                                                                                                                                                                                                                                                                                                                                                                                                                                                                                                                                                                                                                                                                                                                                                          | H1417, ileum x1. One section is examined, it | H1418, colon x1. Eleven sections are examined which                                                                                                                                                                                                                                                                                                                         |

A study investigating the efficacy of BIOEC2015 in reducing the clinical signs associated with canine inflammatory bowel disease (IBD)

FINAL

|   |           |       |   |                                                                                                                                                                                                                                                                                                                                                                                                                                                                                                                                                                                                                                                                           |                                                                                                                                                                                                                                                                                                                                                                                                                                                                                                                                                                                                                                                                           |                                                                                                                                                                                                                                                                                                                                                                                                                                                                                                                                                                  |                                                                                                                                                                                                                                     |
|---|-----------|-------|---|---------------------------------------------------------------------------------------------------------------------------------------------------------------------------------------------------------------------------------------------------------------------------------------------------------------------------------------------------------------------------------------------------------------------------------------------------------------------------------------------------------------------------------------------------------------------------------------------------------------------------------------------------------------------------|---------------------------------------------------------------------------------------------------------------------------------------------------------------------------------------------------------------------------------------------------------------------------------------------------------------------------------------------------------------------------------------------------------------------------------------------------------------------------------------------------------------------------------------------------------------------------------------------------------------------------------------------------------------------------|------------------------------------------------------------------------------------------------------------------------------------------------------------------------------------------------------------------------------------------------------------------------------------------------------------------------------------------------------------------------------------------------------------------------------------------------------------------------------------------------------------------------------------------------------------------|-------------------------------------------------------------------------------------------------------------------------------------------------------------------------------------------------------------------------------------|
|   |           |       |   | <p>morphology are examined, they extend from the surface epithelium to the muscularis mucosa, there is minimal crush artefact and they are of good diagnostic quality. There is no significant inflammation, erosion, ulceration, neoplasia and there are no microorganisms detected in the examined sections.</p>                                                                                                                                                                                                                                                                                                                                                        | <p>extend from the surface epithelium to the muscularis mucosa, they are well orientated and are of good diagnostic quality. The villous propria is infiltrated by low numbers of lymphocytes and plasma cells and fewer eosinophils which also surround and separate crypts. There is no evidence of neoplasia in the examined sections.</p>                                                                                                                                                                                                                                                                                                                             | <p>comprises transverse sections of villi, it is not adequate for examination, within these limits there is no significant inflammation, erosion, ulceration, neoplasia and there are no microorganisms detected.</p>                                                                                                                                                                                                                                                                                                                                            | <p>extend from the surface epithelium to the muscularis mucosa, the lamina propria is infiltrated by moderate numbers of lymphocytes, plasma cells and eosinophils. There is no evidence of neoplasia in the examined sections.</p> |
| 1 | BIOEC2015 | RVB32 | 3 | <p>Duodenum, H2302 (x1); seven pieces of tissue representing duodenal mucosa are examined, one of which includes muscularis mucosa. The sections are variably orientated with mild, multifocal crush artefact, and are of good diagnostic quality. Where longitudinally sectioned villi appear tall and slender and the surface of the tissues is covered by a single layer of tall columnar epithelial cells with few goblet cells, without evidence of ulceration or attenuation. The number of intraepithelial lymphocytes is considered within acceptable limits and the number of lamina propria lymphocytes and plasma cells is mildly to moderately increased.</p> | <p>Duodenum, H2302 (x1); seven pieces of tissue representing duodenal mucosa are examined, one of which includes muscularis mucosa. The sections are variably orientated with mild, multifocal crush artefact, and are of good diagnostic quality. Where longitudinally sectioned villi appear tall and slender and the surface of the tissues is covered by a single layer of tall columnar epithelial cells with few goblet cells, without evidence of ulceration or attenuation. The number of intraepithelial lymphocytes is considered within acceptable limits and the number of lamina propria lymphocytes and plasma cells is mildly to moderately increased.</p> | <p>Colon, H2303 (x1); eight pieces of colonic mucosa which frequently extend to and include muscularis mucosa are examined. The sections are variably orientated and of good diagnostic quality with multifocal crush artefact. The surface of the tissues is covered by a single layer of epithelium overlying which is a moderate amount of mucus admixed with sloughed epithelial cells. Ulceration or attenuation is not apparent. The number of lymphocytes and plasma cells within the lamina propria is considered within acceptable limits and there</p> |                                                                                                                                                                                                                                     |

|   |            |       |   |                                                                                                                                                                                                                                                                                                            |                                                                                                                                                                                                                                                                                                                                                                                                                                           |  |                                                                                                                                                                                                                                                                           |
|---|------------|-------|---|------------------------------------------------------------------------------------------------------------------------------------------------------------------------------------------------------------------------------------------------------------------------------------------------------------|-------------------------------------------------------------------------------------------------------------------------------------------------------------------------------------------------------------------------------------------------------------------------------------------------------------------------------------------------------------------------------------------------------------------------------------------|--|---------------------------------------------------------------------------------------------------------------------------------------------------------------------------------------------------------------------------------------------------------------------------|
|   |            |       |   |                                                                                                                                                                                                                                                                                                            | Occasional eosinophils are observed within the lamina propria. Villous lacteals, where visible, are not considered dilated beyond normal limits and there is no apparent crypt distension or increased fibrous tissue within the lamina propria.                                                                                                                                                                                          |  | are multifocal, large lymphoid aggregates throughout the tissue sections. Occasional individual scattered eosinophils are observed. Lamina propria blood vessels are multifocally congested (possible sampling artefact).                                                 |
| 1 | BIOEC2 015 | RVB35 | 1 | H3552 Stomach x1<br>11 sections of well orientated, partial thickness fundic and pyloric gastric mucosa, with minimal crush artefact, are examined. Helical bacteria ( <i>Helicobacter</i> spp.) are multifocally present in the mucus layer of the pylorus                                                | H3553 Duodenum x1<br>11 sections of well orientated, partial thickness duodenal mucosa, with minimal crush artefact, are examined. The lamina propria contains a moderately increased number of lymphocytes, plasma cells, macrophages and neutrophils and crypts are multifocally expanded by necrotic debris in the lumen (crypt abscesses). Villi are multifocally blunted and fused and lacteals are multifocally, minimally dilated. |  | H3554 Colon x1<br>11 sections of poorly orientated, partial thickness colonic mucosa, with minimal crush artefact, are examined. The sections show a mild multifocal increase in lamina propria lymphocytes and plasma cells.                                             |
| 1 | BIOEC2 015 | RVB35 | 3 | Stomach, J663 x 1: Eleven tissue sections and fragments from fundic and antral mucosa are examined. The majority are of good diagnostic quality and variably extend from the mucosa to the deep lamina propria and occasionally to the muscularis mucosa. The mucosa is lined by well-differentiated tall- | Duodenum, J664 x 1: Ten tissue sections and fragments are examined. They consist of longitudinal and transverse sections that extend from the mucosa to the deep lamina propria and occasionally to the muscularis mucosa. There is diffuse mild shortening and widening of villous profiles with occasional mild dilation of                                                                                                             |  | Colon, J665 x 1: Twelve tissue sections and fragments are examined. They are of good diagnostic quality and include from the mucosa to the muscularis mucosa. The lining epithelium does not exhibit evidence of erosion. The lamina propria contains minimally increased |

|  |  |  |                                                                                                                                                                                                                                                                                                                                                                                                                                               |                                                                                                                                                                                                                                                                                                                   |  |                                                                                                |
|--|--|--|-----------------------------------------------------------------------------------------------------------------------------------------------------------------------------------------------------------------------------------------------------------------------------------------------------------------------------------------------------------------------------------------------------------------------------------------------|-------------------------------------------------------------------------------------------------------------------------------------------------------------------------------------------------------------------------------------------------------------------------------------------------------------------|--|------------------------------------------------------------------------------------------------|
|  |  |  | <p>columnar epithelium, covered by a small amount of pale basophilic material (mucous secretion) in which are embedded moderate numbers of Helicobacter spp. bacteria. Multifocally the mucosa exhibits small haemorrhages (sampling related). Numbers of proprial lymphocytes and plasma cells are within normal limits. There is no evidence of erosion, ulceration, significant inflammation or neoplasia within the examined tissues.</p> | <p>lacteals. The lamina propria contains mildly increased numbers of lymphocytes and plasma cells. Very rarely crypts are dilated and contain eosinophilic fluid with embedded degenerate neutrophils (crypt abscesses). There is no evidence of infections agents or neoplasia within the examined sections.</p> |  | <p>numbers of lymphocytes and plasma cells which produce minimal distortion of the crypts.</p> |
|--|--|--|-----------------------------------------------------------------------------------------------------------------------------------------------------------------------------------------------------------------------------------------------------------------------------------------------------------------------------------------------------------------------------------------------------------------------------------------------|-------------------------------------------------------------------------------------------------------------------------------------------------------------------------------------------------------------------------------------------------------------------------------------------------------------------|--|------------------------------------------------------------------------------------------------|

TABLE A45. Clinical pathology results - Group 1. Diagnosis and comments.

| Group | Treatment | Patient No. | Visit No. | Tissue - Microscopic Diagnosis                                                                                                                                                                                                                                                                                                                                                                                                                                                                                                   | Tissue - Pathologist Comment                                                                                                                                                                                                                                                                                                                                                                                                                                                                            | Tissue - Investigator Comment                                  |
|-------|-----------|-------------|-----------|----------------------------------------------------------------------------------------------------------------------------------------------------------------------------------------------------------------------------------------------------------------------------------------------------------------------------------------------------------------------------------------------------------------------------------------------------------------------------------------------------------------------------------|---------------------------------------------------------------------------------------------------------------------------------------------------------------------------------------------------------------------------------------------------------------------------------------------------------------------------------------------------------------------------------------------------------------------------------------------------------------------------------------------------------|----------------------------------------------------------------|
| 1     | BIOEC2015 | RVB01       | 1         | Gastritis, lymphocytic, plasmacytic, neutrophilic, eosinophilic, multifocal, mild with mucosal fibrosis, multifocal, moderate; stomach. Enteritis, neutrophilic, eosinophilic, multifocal, mild with mucosal atrophy, multifocal, mild; duodenum. Enteritis, neutrophilic, lymphoplasmacytic ulcerative and erosive, multifocal to coalescing, moderate with mucosal fibrosis and atrophy, multifocal, moderate; ileum. Colitis, eosinophilic, neutrophilic, multifocal, mild with mucosal fibrosis, multifocal, moderate; colon | There are extensive chronic active changes present within these sections of stomach and intestines. Mixed cell types are present and would indicate a chronic hypersensitivity is most likely occurring. The most prominent inflammation is occurring in the ileum, where there are dense clusters of neutrophils present within the lamina propria. This likely indicates a bacterial infection in this site. At this site. I did not detect the presence of neoplasia, or microbes in these sections. | Consistent with Inflammatory Bowel disease                     |
| 1     | BIOEC2015 | RVB01       | 3         | Duodenum; mild lymphoplasmacytic infiltration with mild mucosal fibrosis, chronic. Ileum; sample non-diagnostic Colon; mild mucosal fibrosis, chronic                                                                                                                                                                                                                                                                                                                                                                            | Histopathological examination of the received tissues reveals the mild chronic changes within the duodenum and the colon. There was no evidence of neoplasia in the examined sections.                                                                                                                                                                                                                                                                                                                  | Still signs of inflammatory bowel disease with chronic changes |

|   |           |       |   |                                                                                                                                                                                                                                                                                                                                                                                                                                                                                          |                                                                                                                                                                                                                                                                                                                                                                                                                                                                                                                                                                                                                                                                                                                                                                                                                                                                                                                                      |                             |
|---|-----------|-------|---|------------------------------------------------------------------------------------------------------------------------------------------------------------------------------------------------------------------------------------------------------------------------------------------------------------------------------------------------------------------------------------------------------------------------------------------------------------------------------------------|--------------------------------------------------------------------------------------------------------------------------------------------------------------------------------------------------------------------------------------------------------------------------------------------------------------------------------------------------------------------------------------------------------------------------------------------------------------------------------------------------------------------------------------------------------------------------------------------------------------------------------------------------------------------------------------------------------------------------------------------------------------------------------------------------------------------------------------------------------------------------------------------------------------------------------------|-----------------------------|
| 1 | BIOEC2015 | RVB07 | 1 | <p>Small intestine, duodenum and ileum: Enteritis, lymphoplasmacytic, moderate to marked, with villous atrophy and lymph lacteal dilation.</p> <p>Stomach: No significant abnormality recognised. Colon: No significant abnormality recognised.</p>                                                                                                                                                                                                                                      | <p>Endoscopic biopsy of the proximal and distal small intestine reveals significant inflammatory and villous atrophic changes that are likely to be of functional significance at both sites. The prominent lymph lacteal dilation may also be a proxy marker for associated lymphangiectasia involving the deeper layers of the small intestinal wall. Marginal inflammatory changes that are barely out with the normal range for an adult dog, are present in the stomach and colon and are not likely to be of functional significance.</p>                                                                                                                                                                                                                                                                                                                                                                                      | Consistent with IBD         |
| 1 | BIOEC2015 | RVB08 | 1 | <p>MICROSCOPIC DIAGNOSIS:</p> <p>1) Stomach; Multifocal, mild, pyloric, mucosal fibrosis</p> <p>2) Duodenum; Diffuse, mild, lymphoplasmacytic proprial infiltrate</p> <p>3) Ileum; Diffuse, moderate, lymphoplasmacytic and eosinophilic ileitis, with moderate mucoid metaplasia and mild villous stunting</p> <p>4) Colon; Multifocal, mild, lymphoplasmacytic colitis, with moderate oedema</p> <p>5) Caecum; Multifocal, mild, lymphoplasmacytic typhlitis, with moderate oedema</p> | <p>Microscopic examination reveals significant inflammation within the submitted sections of ileum. There is moderate lymphoplasmacytic and eosinophilic ileitis accompanied by mild villous stunting and moderate mucoid metaplasia. This is likely to be functionally significant. A mild lymphoplasmacytic colitis and typhlitis are also present, accompanied by moderate oedema. The oedema may be inflammatory in origin or related to hypoproteinaemia. The duodenal proprial infiltrate is not accompanied by architectural changes and therefore its significance is unclear. The gastric mucosal fibrosis is mild and unlikely to be of significance. A cause for the ileal, caecal and colonic inflammation is not observed in these sections: micro-organisms, parasites and foreign bodies are not identified. Neoplasia is also not identified but its presence out with the submitted samples cannot be excluded.</p> | Results consistent with IBD |

|   |           |       |   |                                                                                                                                                                                                                                                                                                                                                                                                                                           |                                                                                                                                                                                                                                                                                                                                                                                                                                                                                                                                                                                                                                                                                                                                                                                                                                                                                                                                                                                                                                                                                                                                                                                                                                              |                     |
|---|-----------|-------|---|-------------------------------------------------------------------------------------------------------------------------------------------------------------------------------------------------------------------------------------------------------------------------------------------------------------------------------------------------------------------------------------------------------------------------------------------|----------------------------------------------------------------------------------------------------------------------------------------------------------------------------------------------------------------------------------------------------------------------------------------------------------------------------------------------------------------------------------------------------------------------------------------------------------------------------------------------------------------------------------------------------------------------------------------------------------------------------------------------------------------------------------------------------------------------------------------------------------------------------------------------------------------------------------------------------------------------------------------------------------------------------------------------------------------------------------------------------------------------------------------------------------------------------------------------------------------------------------------------------------------------------------------------------------------------------------------------|---------------------|
| 1 | BIOEC2015 | RVB08 | 3 | <p>1) Stomach; multifocal mild, proprial fibrosis, mild proprial lymphoplasmacytic infiltration and mild pyloric lymphoplasmacytic follicular hyperplasia</p> <p>2) Duodenum; multifocal, mild to moderate, lymphoplasmacytic and eosinophilic duodenitis, with mild cryptal distension</p> <p>3) Colon; multifocal, mild, lymphoplasmacytic and neutrophilic colitis, with mild epithelial attenuation, proprial oedema and fibrosis</p> | <p>Histopathological examination reveals mild lymphoplasmacytic follicular hyperplasia within the pyloric sections examined, accompanied by a mild lymphoplasmacytic proprial infiltration and mild proprial fibrosis. There is no evidence of direct surface epithelial damage indicative of gastritis however; therefore this response is non-specific and unlikely to be functionally significant. There are more significant changes present within the duodenum consisting of a mild to moderate lymphoplasmacytic and eosinophilic duodenitis. There is an absence of significant epithelial injury or villous changes but cryptal distension is present. A cause for these duodenal changes is not apparent in the examined sections but the presence of eosinophils is consistent with hypersensitivity, food allergy or endoparasitism (parasites are not observed). There is a mild lymphoplasmacytic and neutrophilic colitis accompanied by mild epithelial attenuation and superficial proprial oedema and fibrosis. The cause for this is uncertain; micro-organisms were not observed. Neoplasia was not observed in any of the submitted tissues however its presence out with the examined sections cannot be excluded.</p> | Consistent with IBD |
| 1 | BIOEC2015 | RVB13 | 1 | <p>Stomach, marked diffuse chronic lymphoplasmacytic gastritis</p> <p>Ileum and duodenum, moderate diffuse chronic lymphoplasmacytic enteritis</p> <p>Colon, minimal lymphoplasmacytic colitis</p>                                                                                                                                                                                                                                        | <p>Histopathological examination of the submitted sections reveals significant changes in the stomach and small intestine. The changes in the stomach are the most severe. The inciting cause of these changes, especially given the duration of the clinical signs is not clear from these sections, but we have no evidence of neoplasia or infectious organisms in the examined sections. The gastric lymphofollicular hyperplasia is striking,</p>                                                                                                                                                                                                                                                                                                                                                                                                                                                                                                                                                                                                                                                                                                                                                                                       | Consistent with IBD |

|   |           |       |   |                                                                                                                                                                                                                                                                                                                                                                                                                                                                                                                                                                                                                                        |                                                                                                                                                                                                                                                                                                                                                                                                                                                                                                                                                                                                                                                                                                                                                                                                                                                                                                                                                                                                                                                                                                                                  |                     |
|---|-----------|-------|---|----------------------------------------------------------------------------------------------------------------------------------------------------------------------------------------------------------------------------------------------------------------------------------------------------------------------------------------------------------------------------------------------------------------------------------------------------------------------------------------------------------------------------------------------------------------------------------------------------------------------------------------|----------------------------------------------------------------------------------------------------------------------------------------------------------------------------------------------------------------------------------------------------------------------------------------------------------------------------------------------------------------------------------------------------------------------------------------------------------------------------------------------------------------------------------------------------------------------------------------------------------------------------------------------------------------------------------------------------------------------------------------------------------------------------------------------------------------------------------------------------------------------------------------------------------------------------------------------------------------------------------------------------------------------------------------------------------------------------------------------------------------------------------|---------------------|
|   |           |       |   |                                                                                                                                                                                                                                                                                                                                                                                                                                                                                                                                                                                                                                        | but may just indicate the chronicity of the disease process.                                                                                                                                                                                                                                                                                                                                                                                                                                                                                                                                                                                                                                                                                                                                                                                                                                                                                                                                                                                                                                                                     |                     |
| 1 | BIOEC2015 | RVB13 | 3 | <p>G2615: Gastritis, ulcerative and erosive, lymphoplasmacytic, neutrophilic, eosinophilic, histiocytic, multifocal, marked, chronic with lymphoid hyperplasia, multifocal, marked; stomach G2616: Enteritis, lymphoplasmacytic, eosinophilic, neutrophilic, multifocal to coalescing, moderate, chronic with villous atrophy, multifocal, marked; duodenum G2617: Ileitis, lymphoplasmacytic, neutrophilic, eosinophilic, multifocal to coalescing, marked, chronic with mucosal atrophy, multifocal, moderate; ileum G2618: Colitis, lymphoplasmacytic, neutrophilic, histiocytic, multifocal, marked, chronic ulcerative; Colon</p> | <p>The appearance of these sections is consistent with chronic gastroenteritis. The most severely affected areas are the stomach, and to a lesser extent the duodenum and ileum and colon. The inflammatory cell types present in the stomach, duodenum and ileum are mixed. Prominent numbers of eosinophils are present, potentially indicating a hypersensitivity type disorder, which could be consistent with IBD, as noted clinically. Low to moderate numbers of neutrophils are present at all sites, likely indicating a secondary bacterial infection is occurring. Increased numbers of large granular lymphocytes are noted in the duodenum and ileum, likely indicating an innate immune response to luminal antigens. There are low numbers of macrophages in the lamina propria in the stomach and colon. This likely indicates a "clean-up" process is taking place. Perhaps FISH could be ordered on the colonic sections, although the appearance is not typical of histiocytic ulcerative colitis. There was no evidence of microbial pathogens in these sections and no evidence of neoplasia was noted.</p> | Consistent with IBD |



|   |           |       |   |                                                                                                                                                                                                                                                                                                                                                                                                                                                                                                                                                                                               |                                                                                                                                                                                                                                                                                                                                                                                                                                                                                                                                                                                                                                                                                                                                                              |                     |
|---|-----------|-------|---|-----------------------------------------------------------------------------------------------------------------------------------------------------------------------------------------------------------------------------------------------------------------------------------------------------------------------------------------------------------------------------------------------------------------------------------------------------------------------------------------------------------------------------------------------------------------------------------------------|--------------------------------------------------------------------------------------------------------------------------------------------------------------------------------------------------------------------------------------------------------------------------------------------------------------------------------------------------------------------------------------------------------------------------------------------------------------------------------------------------------------------------------------------------------------------------------------------------------------------------------------------------------------------------------------------------------------------------------------------------------------|---------------------|
| 1 | BIOEC2015 | RVB16 | 1 | <p>G2168: gastritis, lymphoplasmacytic, neutrophilic, multifocal, moderate, chronic, with mucosal fibrosis, multifocal, moderate; stomach<br/>                 G2169: enteritis, lymphoplasmacytic, eosinophilic, neutrophilic, multifocal to coalescing, moderate, chronic; duodenum<br/>                 G2170: enteritis, lymphoplasmacytic, neutrophilic, eosinophilic, multifocal to coalescing, chronic; ileum<br/>                 G2171: colitis, lymphoplasmacytic,, multifocal to coalescing, moderate, chronic with mucosal fibrosis, multifocal, moderate neutrophilic; colon</p> | <p>There is evidence of chronic gastroenteritis in these sections. The more severe changes are within the duodenum, ileum and colon, which would correlate with the clinical signs. The severity of the inflammation present would fit with a protein losing enteropathy. The inflammatory cells present at these sites are mixed. There are moderately increased numbers of eosinophils present within the stomach, duodenum and the ileum, which may indicate a hypersensitive=ty type disorder. There are also moderately increased numbers of neutrophils present at both sites, indicative of a secondary bacterial infection. I did not detect evidence of microbial pathogens in these sections. Neither was there evidence of neoplasia present.</p> | Consistent with IBD |
| 1 | BIOEC2015 | RVB16 | 3 | <p>G3084, stomach; mild, diffuse, lymphoplasmacytic gastritis with mucosal fibrosis G3085, duodenum; chronic, mild, diffuse, lymphoplasmacytic duodenitis with mild crypt distension and mineralisation G3086, ileum; mild, diffuse, lymphoplasmacytic ileitis G3087, colon; chronic, mild, diffuse, lymphoplasmacytic colitis with mild mucosal fibrosis and crypt distortion</p>                                                                                                                                                                                                            | <p>There is evidence of chronic, mild, lymphoplasmacytic gastroenteritis throughout the examined sections, consistent with an ongoing inflammatory bowel disease. Neutrophils or eosinophils within the lamina propria are not identified and there is no evidence of microbial organisms or neoplasia identified. The slides from endoscopic biopsies submitted in 07/16 have been reviewed and compared with the current submission. Progression of the inflammatory and/or fibrosing disease process is not apparent and there is overall decrease in the amount and type of the inflammatory cell component</p>                                                                                                                                          |                     |

|   |           |       |   |                                                                                                                                                                                                                                                                                                                                                |                                                                                                                                                                                                                                                                                                                                                                                                                                                                                                                                                                                                                                                                                                                                                                                                                                                       |                                |
|---|-----------|-------|---|------------------------------------------------------------------------------------------------------------------------------------------------------------------------------------------------------------------------------------------------------------------------------------------------------------------------------------------------|-------------------------------------------------------------------------------------------------------------------------------------------------------------------------------------------------------------------------------------------------------------------------------------------------------------------------------------------------------------------------------------------------------------------------------------------------------------------------------------------------------------------------------------------------------------------------------------------------------------------------------------------------------------------------------------------------------------------------------------------------------------------------------------------------------------------------------------------------------|--------------------------------|
| 1 | BIOEC2015 | RVB18 | 1 | <p>1. G2372 (x1): Within normal limits, fundus and pylorus, stomach</p> <p>2. G2373 (x1): Within normal limits, duodenum</p> <p>3. G2374 (x1): Enteritis, eosinophilic, chronic, multifocal, moderate with lymphangiectasia, multifocal, moderate, ileum</p> <p>4. G2375 (x1): Colitis, eosinophilic, chronic, multifocal, moderate, colon</p> | <p>The ileal and colonic mucosa of this dog is chronically inflamed and the mixed, eosinophil-rich character of the inflammatory infiltrate is most consistent with a chronic hypersensitivity reaction. Such reaction is not specific to a particular cause and may be reactive to either ingested antigens, enteric parasites, changes within the microbiome or reflect a more generalised inflammatory reaction as encompassed by the term 'inflammatory bowel disease'. There is variable oedema of the lamina propria which may potentially reflect increased gastrointestinal permeability secondary to the inflammation within these tissues or enteric albumin loss. The sections of stomach and duodenum are within normal limits. There is no evidence of neoplasia within the examined sections and microorganisms are not identified.</p> | Clinically consistent with IBD |
| 1 | BIOEC2015 | RVB18 | 3 | <p>Gastritis, lymphocytic to plasmacytic, chronic, multifocal, moderate, stomach. Enteritis, lymphocytic to plasmacytic, chronic, multifocal, mild, duodenum and ileum. Colitis, eosinophilic, chronic, multifocal, marked, colon.</p>                                                                                                         | <p>These samples of gastrointestinal mucosa are chronically inflamed with the most severe inflammation affecting the colon. The eosinophil rich character of the inflammatory infiltrate within the colon is most suggestive of a reaction against either ingested antigens or enteric parasites. There is no evidence of neoplasia within the examined sections.</p>                                                                                                                                                                                                                                                                                                                                                                                                                                                                                 | Consistent with IBD            |
| 1 | BIOEC2015 | RVB27 | 1 | <p>Stomach; minimal lymphoplasmacytic gastritis with mild mucosal fibrosis</p> <p>Duodenum; mild lymphoplasmacytic duodenitis</p> <p>Colon; minimal lymphoplasmacytic colitis</p>                                                                                                                                                              | <p>Histopathological examination reveals a range of mild inflammatory changes in the gastrointestinal tract of this dog. There is no evidence of neoplasia or the presence of microorganisms in the examined sections. If other causes have been ruled out, the histological changes are potentially consistent with IBD as a cause of the clinical signs in this dog</p>                                                                                                                                                                                                                                                                                                                                                                                                                                                                             |                                |

|   |           |       |   |                                                                                                                                                                                                                                                  |                                                                                                                                                                                                                                                                                                                                                                                                                                                                                                                                                                                                                                                                                                                                                                                                                                                                                                                                                                                                                               |                     |
|---|-----------|-------|---|--------------------------------------------------------------------------------------------------------------------------------------------------------------------------------------------------------------------------------------------------|-------------------------------------------------------------------------------------------------------------------------------------------------------------------------------------------------------------------------------------------------------------------------------------------------------------------------------------------------------------------------------------------------------------------------------------------------------------------------------------------------------------------------------------------------------------------------------------------------------------------------------------------------------------------------------------------------------------------------------------------------------------------------------------------------------------------------------------------------------------------------------------------------------------------------------------------------------------------------------------------------------------------------------|---------------------|
| 1 | BIOEC2015 | RVB29 | 1 | Stomach; diffuse, mild lymphoplasmacytic and neutrophilic gastritis with mild surface epithelial injury and glandular atrophy affecting the fundus Duodenum; moderate lymphoplasmacytic and neutrophilic duodenitis Colon; histologically normal | Microscopic examination of the submitted gastrointestinal endoscopic biopsies identifies a mild to moderate lymphoplasmacytic and neutrophilic inflammatory infiltrate within the stomach and duodenum. In addition, there is evidence of surface epithelial injury and glandular atrophy within the fundic region of the stomach. These changes are nonspecific and may be indicative of an inflammatory bowel disease type process. Some of the changes may also be partly attributable to the repeated and chronic vomiting episodes. The sections of colon appear histologically normal and there is no evidence of neoplasia within any of the examined tissue sections.                                                                                                                                                                                                                                                                                                                                                 | Consistent with IBD |
| 1 | BIOEC2015 | RVB29 | 3 | Duodenum; mild lymphoplasmacytic duodenitis. Colon; histologically unremarkable                                                                                                                                                                  | There is moderate presumptive freeze-thaw artefact affecting the tissues with retraction of crypt epithelium from the basement membrane. There is also some loss of cellular detail. Within these limits it is possible to appreciate the cellularity and usually the cell types present within the tissues. Assessment of lacteals given the artefactual changes becomes more challenging to accurately assess. Sections available here are also orientated in such a way that accurate assessment of villous morphology is precluded. In this case there appears to be a mild lymphoplasmacytic duodenitis, the colon is considered histologically unremarkable. I have noticed that endoscopic biopsies were assessed histologically from this dog (P303949) in April, it would be interesting to know if these samples were obtained at the same time. Please do not hesitate to contact me should you wish to discuss this further (6265, pittaway@rvc.ac.uk). These samples, within the limits of freeze-thaw artefact, |                     |

|   |           |       |   |                                                                                                                                                                                                        |                                                                                                                                                                                                                                                                                                                                                                                                                                                                                                                                                                                                                                                                                                                                                                                                                 |                                                                                      |
|---|-----------|-------|---|--------------------------------------------------------------------------------------------------------------------------------------------------------------------------------------------------------|-----------------------------------------------------------------------------------------------------------------------------------------------------------------------------------------------------------------------------------------------------------------------------------------------------------------------------------------------------------------------------------------------------------------------------------------------------------------------------------------------------------------------------------------------------------------------------------------------------------------------------------------------------------------------------------------------------------------------------------------------------------------------------------------------------------------|--------------------------------------------------------------------------------------|
|   |           |       |   |                                                                                                                                                                                                        | identify a mild lymphoplasmacytic duodenitis, compared to a moderate lymphoplasmacytic and neutrophilic duodenitis that was diagnosed from samples submitted in April. This may suggest an improvement in the degree of inflammation present in the duodenum. These results, however, may not be directly comparable and should be interpreted in light of the fact that only two small fragments are available to be assessed in these most recent samples, compared to 12 sections in April, which is therefore less reliably representative. In addition, the prior freezing of the most recent sample potentially makes the identification of specific subtle features, such as the presence of individual neutrophils, challenging. The colon in both sets of samples is considered histologically normal. |                                                                                      |
| 1 | BIOEC2015 | RVB32 | 1 | Stomach; no significant changes<br>Duodenum; mild lymphoplasmacytic and eosinophilic duodenitis<br>Ileum; no significant changes<br>Colon; mild to moderate lymphoplasmacytic and eosinophilic colitis | Histopathological examination of the submitted sections reveals potentially significant inflammatory changes in the duodenum and colon of this dog. The character of the inflammation is potentially consistent with eg a dietary hypersensitivity if this is compatible with the clinical picture in this case.                                                                                                                                                                                                                                                                                                                                                                                                                                                                                                | Clinical and histopathological evidence of inflammatory change in duodenum and colon |
| 1 | BIOEC2015 | RVB32 | 3 | Duodenum; mild to moderate lymphoplasmacytic duodenitis<br>Colon; histologically unremarkable                                                                                                          | Microscopic examination of the submitted duodenal and colonic endoscopic biopsies is carried out. This identifies a mild to moderate lymphoplasmacytic duodenitis. The colon is considered histologically unremarkable. The changes within the duodenum would be consistent with an inflammatory bowel disease providing other causes have been excluded. There is no evidence of neoplasia or of infectious organisms within the examined tissue sections.                                                                                                                                                                                                                                                                                                                                                     |                                                                                      |

|   |           |       |   |                                                                                                                                                                                                                                                                                                 |                                                                                                                                                                                                                                                                                                                                                                                                                                                                                                                                                                                                                                                                                                                                                                    |  |
|---|-----------|-------|---|-------------------------------------------------------------------------------------------------------------------------------------------------------------------------------------------------------------------------------------------------------------------------------------------------|--------------------------------------------------------------------------------------------------------------------------------------------------------------------------------------------------------------------------------------------------------------------------------------------------------------------------------------------------------------------------------------------------------------------------------------------------------------------------------------------------------------------------------------------------------------------------------------------------------------------------------------------------------------------------------------------------------------------------------------------------------------------|--|
| 1 | BIOEC2015 | RVB35 | 1 | <p>Stomach, pylorus: Occasional Helicobacter spp.<br/>                 Duodenum: Moderate, diffuse lymphoplasmacytic and suppurative duodenitis<br/>                 Colon: Minimally increased proprial lymphocytes and plasma cells</p>                                                       | <p>The only significant changes in the sections examined are in those from the duodenum. The duodenal lamina propria is expanded by a mixed population of inflammatory cells, making inflammatory bowel disease the most likely diagnosis. Lacteal dilation is relatively minimal in the sections examined, but the villi are somewhat distended by the proprial infiltrate which may have resembled lacteal dilation on endoscopy; alternatively, the dilation may be deeper in the submucosa, which is not sampled. Despite the endoscopic description of severe inflammation in the colon on endoscopy, there is only a minimal increase in inflammatory cells in the sections we have examined, though these may not be representative of the whole colon.</p> |  |
| 1 | BIOEC2015 | RVB35 | 3 | <p>MICROSCOPIC DIAGNOSES: =<br/>                 1. Stomach; moderate numbers of luminal Helicobacter spp.<br/>                 2. Duodenum; multifocal, mild, chronic lymphoplasmacytic duodenitis<br/>                 3. Colon; diffuse, chronic, minimal lymphoplasmacytic inflammation</p> | <p>Microscopic examination reveals mild inflammatory changes affecting the duodenal mucosa and colon. These changes, in-keeping with the reported history of good response to dietary modification, possibly suggest dietary hypersensitivity as the primary problem rather than true IBD. However, as IBD is usually a diagnosis of exclusion, a mild form cannot be ruled out. There is no evidence of neoplasia or infectious agents in the examined tissues.</p>                                                                                                                                                                                                                                                                                               |  |

TABLE A46. Clinical pathology results -Group 2.

| Group | Treatment | Patient No. | Visit No. | Tissue - Microscopic description - Stomach                                                                                                                                                                                                                                                                                                                      | Tissue - Microscopic description - Duodenum                                                                                                                                                                                                                                                                                              | Tissue - Microscopic description - Ileum                                                                                                                                                                                                                                                                                                                                                   | Tissue - Microscopic description - Colon                                                                                                                                                                                                                                                                                                                                                                                                       |
|-------|-----------|-------------|-----------|-----------------------------------------------------------------------------------------------------------------------------------------------------------------------------------------------------------------------------------------------------------------------------------------------------------------------------------------------------------------|------------------------------------------------------------------------------------------------------------------------------------------------------------------------------------------------------------------------------------------------------------------------------------------------------------------------------------------|--------------------------------------------------------------------------------------------------------------------------------------------------------------------------------------------------------------------------------------------------------------------------------------------------------------------------------------------------------------------------------------------|------------------------------------------------------------------------------------------------------------------------------------------------------------------------------------------------------------------------------------------------------------------------------------------------------------------------------------------------------------------------------------------------------------------------------------------------|
| 2     | Placebo   | RVB02       | 1         | Gastric fundus and antrum; F2997 (x1): 10 good quality endoscopic biopsies representing superficial and deep fundic and pyloric mucosa are examined. Occasional Helicobacter-type organisms are observed on the epithelial surface. Multifocally, gastric glands are diffusely separated by clear space (oedema) within the lamina propria (sampling artefact). | Duodenum; F2998 (x1): Eleven well orientated endoscopic biopsies of duodenal mucosa including partial and full length villi fragments are examined. Where longitudinally sectioned, villus morphology is within normal limits. The lamina propria is infiltrated by low to moderately increased numbers of lymphocytes and plasma cells. | Ileum; F2999 (x1): Ten well orientated endoscopic biopsies of superficial and full thickness mucosa are examined. Where sectioned longitudinally villi appear mildly shortened with broad bases (atrophy). There is mild cryptal enterocyte hyperplasia. Within the lamina propria, there is a mild, multifocal increase in eosinophils.                                                   | Colon; F3000 (x1): Ten, well orientated endoscopic biopsies which extend to the lamina muscularis are examined. Multifocally, epithelium is mildly attenuated and the lamina propria is mildly expanded by clear spaces (oedema). There is a mild increase in eosinophils within the superficial lamina propria.                                                                                                                               |
| 2     | Placebo   | RVB02       | 3         |                                                                                                                                                                                                                                                                                                                                                                 | Duodenum; G49 (x1): ten sections are examined which are composed of poorly orientated superficial mucosa. There is no evidence of mucosal erosion or ulceration. The lamina propria is infiltrated by low numbers of lymphocytes and plasma cells.                                                                                       | Ileum; G50 (x1): two sections are examined which are composed of superficial samples which are subject to significant squash artefact. On the limited mucosa available for examination there is no evidence of erosion or ulceration. Occasional intraepithelial lymphocytes are present. The lamina propria and crypt and villi architecture are unable to be assessed in these sections. | Colon; G51 (x1): twelve sections are examined which are composed of mucosa and lamina propria. There is no evidence of mucosal erosion or ulceration. Diffusely there are scattered intraepithelial lymphocytes. The lamina propria is diffusely infiltrated by low numbers of neutrophils, lymphocytes and plasma cells and crypts are separated by a mildly increased amount of fibrous tissue. Multifocally crypts are mildly hyperplastic. |

A study investigating the efficacy of BIOEC2015 in reducing the clinical signs associated with canine inflammatory bowel disease (IBD)

FINAL

|   |         |       |   |                                                                                                                                                                                                                                                                                                                                                                                                                                                                                                                                                                                                                                                                                                                                                                                             |                                                                                                                                                                                                                                                                                                                                                                                                                                                                                                                                                                                                                                                                                                                                                                                                                           |                                                                                                                                                                                                                                                                                                                                                                                                                                                                                                                                                                                                                                                                                                                                                                                                                          |                                                                                                                                                                                                                                                                                                                                                                                           |
|---|---------|-------|---|---------------------------------------------------------------------------------------------------------------------------------------------------------------------------------------------------------------------------------------------------------------------------------------------------------------------------------------------------------------------------------------------------------------------------------------------------------------------------------------------------------------------------------------------------------------------------------------------------------------------------------------------------------------------------------------------------------------------------------------------------------------------------------------------|---------------------------------------------------------------------------------------------------------------------------------------------------------------------------------------------------------------------------------------------------------------------------------------------------------------------------------------------------------------------------------------------------------------------------------------------------------------------------------------------------------------------------------------------------------------------------------------------------------------------------------------------------------------------------------------------------------------------------------------------------------------------------------------------------------------------------|--------------------------------------------------------------------------------------------------------------------------------------------------------------------------------------------------------------------------------------------------------------------------------------------------------------------------------------------------------------------------------------------------------------------------------------------------------------------------------------------------------------------------------------------------------------------------------------------------------------------------------------------------------------------------------------------------------------------------------------------------------------------------------------------------------------------------|-------------------------------------------------------------------------------------------------------------------------------------------------------------------------------------------------------------------------------------------------------------------------------------------------------------------------------------------------------------------------------------------|
| 2 | Placebo | RVB05 | 1 | <p>F3398 (x1) Stomach: 8 sections of fundic and pyloric mucosa are examined. The epithelium overlying these sections is diffusely intact. Intraepithelial lymphocytes are present in increased numbers at a frequency of up to 5 cells per high-power field stretch of epithelium. Mucosal glands are separated by mild proliferations of fibrous connective tissue and this fibrous stroma is multifocally infiltrated by moderately increased numbers of lymphocytes and plasma cells at a frequency of up to 50 cells per HPF. Expanding the superficial submucosa are moderate amounts of oedema. Eosinophils are present at a frequency of up to 2 cells per HPF and neutrophils are not identified. Lymphoid aggregates occupy up to 25% of the biopsy area (marked hyperplasia).</p> | <p>F3399 (x 1) Duodenum: Villi within these sections are reduced to approximately 75% of normal height and overlaid by diffusely intact tall columnar epithelial cells. Intraepithelial lymphocytes are present at a frequency of up to 20 cells per HPF stretch of epithelium. Central lacteals are dilated and occupy up 50% of the villous width. Up to 25% of the intestinal crypts are dilated and contains abundant accumulations of amorphous eosinophilic material admixed with degenerate cellular debris (crypt abscesses). Expanding the lamina propria are moderately increased numbers of lymphocytes and plasma cells which occupy up to 75% of the area per HPF. Up to 10 cells are present between the crypts. Approximately 5 eosinophils are identified per HPF and neutrophils are not identified.</p> | <p>F3400 (x1) Villi within these sections are reduced to approximately 50% of normal height and overlaid by diffusely intact tall columnar epithelial cells. Intraepithelial lymphocytes are present at a frequency of up to 20 cells per HPF stretch of epithelium. Central lacteals are markedly dilated and occupy up 75% of the villous width. Up to 25% of the intestinal crypts are dilated and contains abundant accumulations of amorphous eosinophilic material admixed with degenerate cellular debris (crypt abscesses). Expanding the lamina propria are moderately increased numbers of lymphocytes and plasma cells which occupy up to 50% of the area per = HPF. Up to 5 cells are present between the crypts. Approximately 5 eosinophils are identified per HPF and neutrophils are not identified.</p> | <p>F3401 (x1) Colon: The epithelium overlying these sections is diffusely intact and is formed of tall columnar epithelial cells. Colonic crypts are well organised and are separated by expected amounts of fibrous connective tissue. Infiltrating the lamina propria are mildly increased numbers of lymphocytes and plasma cells. Eosinophils and neutrophils are not identified.</p> |
| 2 | Placebo | RVB09 | 1 | <p>Gastric fundus and antrum; G268 (x1): Nine fragments of tissue representing superficial and deep fundic and pyloric mucosa are examined. Occasionally gastric glands are diffusely separated by clear</p>                                                                                                                                                                                                                                                                                                                                                                                                                                                                                                                                                                                | <p>Duodenum; G269 (x1): Eleven variably orientated endoscopic biopsies of duodenal mucosa including partial and full length villi fragments are examined. Where longitudinally sectioned, villi are markedly</p>                                                                                                                                                                                                                                                                                                                                                                                                                                                                                                                                                                                                          | <p>Ileum; G270 (x1): Thirteen variably orientated endoscopic biopsies of superficial mucosa are examined. Where sectioned longitudinally villi appear markedly shortened and fused</p>                                                                                                                                                                                                                                                                                                                                                                                                                                                                                                                                                                                                                                   | <p>Colon; G271 (x1): Ten, variably orientated endoscopic biopsies representing superficial and deep colonic mucosa are examined. The lamina propria is mildly expanded</p>                                                                                                                                                                                                                |

|   |         |       |   |                                                                                                                                                                                                                                                                                                                                                                                       |                                                                                                                                                                                                                                                                                                                                                                                                                                                                                                                                                                                                                                                                                                       |                                                                                                                                                                                                                                                                                                                                                                                                                                                                                                                            |                                                                                                                                                                                                        |
|---|---------|-------|---|---------------------------------------------------------------------------------------------------------------------------------------------------------------------------------------------------------------------------------------------------------------------------------------------------------------------------------------------------------------------------------------|-------------------------------------------------------------------------------------------------------------------------------------------------------------------------------------------------------------------------------------------------------------------------------------------------------------------------------------------------------------------------------------------------------------------------------------------------------------------------------------------------------------------------------------------------------------------------------------------------------------------------------------------------------------------------------------------------------|----------------------------------------------------------------------------------------------------------------------------------------------------------------------------------------------------------------------------------------------------------------------------------------------------------------------------------------------------------------------------------------------------------------------------------------------------------------------------------------------------------------------------|--------------------------------------------------------------------------------------------------------------------------------------------------------------------------------------------------------|
|   |         |       |   | space (oedema) within the lamina propria (sampling artefact).                                                                                                                                                                                                                                                                                                                         | reduced in length and frequently fused. The lamina propria is infiltrated by moderately increased numbers of lymphocytes, plasma cells and occasional neutrophils and crypts are multifocally distended and contain clusters of viable and degenerate neutrophils.                                                                                                                                                                                                                                                                                                                                                                                                                                    | with broad bases (atrophy). Within the lamina propria, there is a moderate, diffuse increase in lymphocytes, plasma cells and histiocytes.                                                                                                                                                                                                                                                                                                                                                                                 | by clear spaces (oedema) and there is a diffuse increase in lymphocytes and plasma cells.                                                                                                              |
| 2 | Placebo | RVB11 | 1 | Stomach, G338 (x1): Nine sections of stomach of good diagnostic quality are examined, the largest measuring 2mm x 2mm. There is mild expansion of the lamina propria by clear spaces (oedema) and separation of glands by a very mild increase in fibrous connective tissue. There is no overt evidence of epithelial injury, inflammation or neoplasia within the examined sections. | Duodenum, G339 (x1): Eleven sections of duodenum of good diagnostic quality are examined, the largest measuring 3mm x 2mm. There is multifocal necrosis of the epithelium and lamina propria, associated with infiltration by moderate numbers of neutrophils. There is villus blunting and fusion and the lamina propria is infiltrated by moderate to large numbers of lymphocytes and plasma cells and lesser numbers of neutrophils and eosinophils. There are multifocal crypt abscesses. Intra-epithelial large lymphocytes are observed within crypt epithelium. Overlying the epithelial surface is a moderate increase in basophilic material (mucus) admixed with mixed bacterial colonies. | Ileum, G340 (x1): Ten sections of ileum of good diagnostic quality are examined, the largest measuring 4mm x 2mm. There is a moderate increase in the number of lymphocytes and plasma cells, with low numbers of neutrophils, within the lamina propria. There is multifocally extensive, mild to moderate, lacteal ectasia. Moderate numbers of crypt abscesses are observed multifocally. Overlying the epithelial surface is a moderate increase in basophilic material (mucus) admixed with mixed bacterial colonies. | Colon, G341 (x1): Fourteen sections of colon are examined. There is mild crypt hyperplasia. Two lymphoid follicles are observed. The overlying mucus contains low numbers of mixed bacterial colonies. |



|   |         |       |   |                                                                                                                                                                                                                                                                                                                                                                                                                                                                               |                                                                                                                                                                                                                                                                                                                                                                                                                                                                                                              |                                                                                                                                                                                                                                                                                                                                                                                                                                                                             |                                                                                                                                                                                                                                                                                                                                                                                                                                     |
|---|---------|-------|---|-------------------------------------------------------------------------------------------------------------------------------------------------------------------------------------------------------------------------------------------------------------------------------------------------------------------------------------------------------------------------------------------------------------------------------------------------------------------------------|--------------------------------------------------------------------------------------------------------------------------------------------------------------------------------------------------------------------------------------------------------------------------------------------------------------------------------------------------------------------------------------------------------------------------------------------------------------------------------------------------------------|-----------------------------------------------------------------------------------------------------------------------------------------------------------------------------------------------------------------------------------------------------------------------------------------------------------------------------------------------------------------------------------------------------------------------------------------------------------------------------|-------------------------------------------------------------------------------------------------------------------------------------------------------------------------------------------------------------------------------------------------------------------------------------------------------------------------------------------------------------------------------------------------------------------------------------|
| 2 | Placebo | RVB11 | 3 | <p>Stomach; G1127 (x1): ten sections are examined which are variably composed of fundic and pyloric mucosa, lamina propria and muscularis mucosa. The majority of sections are of diagnostic quality. Most sections examined are within normal limits, with no evidence of mucosal erosion or ulceration, inflammation or neoplasia.</p> <p>Occasionally there is very mild superficial proprial oedema. In one section there is a mildly hyperplastic lymphoid follicle.</p> | <p>Duodenum; G1128 (x1): fourteen sections are examined which are variably composed of mucosa and lamina propria. Approximately half of the sections are of diagnostic quality with the other half being either too small or superficial. There is diffuse mild blunting of villi and multifocal mild lacteal ectasia. There is no evidence of mucosal erosion or ulceration, infection or neoplasia. The lamina propria is diffusely infiltrated by a minimally increased lymphocytes and plasma cells.</p> | <p>Ileum; G1129 (x1): nine sections are examined which are variably composed of mucosa and lamina propria. The majority of sections are of diagnostic quality. There is no evidence of mucosal erosion or ulceration, infection or neoplasia. Multifocally there is mild lacteal ectasia and the lamina propria is diffusely infiltrated by minimally increased lymphocytes and plasma cells</p>                                                                            | <p>Colon; G1130 (x1): eleven sections are examined which are variably composed of mucosa, lamina propria and muscularis mucosa. The majority of sections are of diagnostic quality. There is no evidence of mucosal erosion or ulceration, infection or neoplasia. Focally there is mild dysplasia of crypts and diffusely the lamina propria is infiltrated by minimally increased lymphocytes and plasma cells.</p>               |
| 2 | Placebo | RVB12 | 1 | <p>Stomach: G702 (x1): Eleven pieces of stomach are examined which are variably composed of fundic and pyloric mucosa and submucosa. The biopsies are of excellent diagnostic quality. There is no ulceration or erosion of the gastric epithelium and the prevalence of lymphoid follicles within the lamina propria are within normal limits.</p>                                                                                                                           | <p>Duodenum: G703 (x1): Ten pieces of duodenum are examined which are composed of mucosa and submucosa. The biopsies are of excellent diagnostic quality. There is no ulceration or erosion of the epithelium and villi are an appropriate length.</p>                                                                                                                                                                                                                                                       | <p>Ileum 6704: Nine pieces of ileum are examined which are variably composed of mucosa, submucosa and muscularis. The biopsies are of excellent diagnostic quality. There is no ulceration or erosion of the epithelium, however it is multifocally overlain by a large amount of mucus and cellular debris. The villi are mildly stunted and there is a very mild increase in eosinophils, lymphocytes and plasma cells within the lamina propria. Occasionally crypts</p> | <p>Colon: G705 (x1): Ten pieces of colon are examined which are composed of mucosa and submucosa. The biopsies are of excellent diagnostic quality. There is no ulceration or erosion of the epithelium, however diffusely the epithelium is overlain by a large amount of mucus. The collagen fibres of the superficial lamina propria are expanded by clear space (oedema) and diffusely the lamina propria is infiltrated by</p> |

|   |         |       |   |                                                                                                                                                                                                                                                                                                                                                                                                                                                                                                                                                                                                                                                                                                                                                                                                                                                                                                                                 |                                                                                                                                                                                                                                                                                                                                                                                                                                                                                                                                                                                                                                                                                                                                                                                                                                                                                                                                         |                                                                                                                                                                                                                                                                                                                                                                                                                                                                                                                                                                                                                                                                                                                                                                                                        |                                                                                                                                                                                                                                                                                                                                                                                                                                                                                                                                                                                                                                                                                                                                                                                                                                    |
|---|---------|-------|---|---------------------------------------------------------------------------------------------------------------------------------------------------------------------------------------------------------------------------------------------------------------------------------------------------------------------------------------------------------------------------------------------------------------------------------------------------------------------------------------------------------------------------------------------------------------------------------------------------------------------------------------------------------------------------------------------------------------------------------------------------------------------------------------------------------------------------------------------------------------------------------------------------------------------------------|-----------------------------------------------------------------------------------------------------------------------------------------------------------------------------------------------------------------------------------------------------------------------------------------------------------------------------------------------------------------------------------------------------------------------------------------------------------------------------------------------------------------------------------------------------------------------------------------------------------------------------------------------------------------------------------------------------------------------------------------------------------------------------------------------------------------------------------------------------------------------------------------------------------------------------------------|--------------------------------------------------------------------------------------------------------------------------------------------------------------------------------------------------------------------------------------------------------------------------------------------------------------------------------------------------------------------------------------------------------------------------------------------------------------------------------------------------------------------------------------------------------------------------------------------------------------------------------------------------------------------------------------------------------------------------------------------------------------------------------------------------------|------------------------------------------------------------------------------------------------------------------------------------------------------------------------------------------------------------------------------------------------------------------------------------------------------------------------------------------------------------------------------------------------------------------------------------------------------------------------------------------------------------------------------------------------------------------------------------------------------------------------------------------------------------------------------------------------------------------------------------------------------------------------------------------------------------------------------------|
|   |         |       |   |                                                                                                                                                                                                                                                                                                                                                                                                                                                                                                                                                                                                                                                                                                                                                                                                                                                                                                                                 |                                                                                                                                                                                                                                                                                                                                                                                                                                                                                                                                                                                                                                                                                                                                                                                                                                                                                                                                         | are surrounded by mildly increased fibrous tissue                                                                                                                                                                                                                                                                                                                                                                                                                                                                                                                                                                                                                                                                                                                                                      | low numbers of lymphocytes and plasma cells. The colonic crypts are mildly hyperplastic                                                                                                                                                                                                                                                                                                                                                                                                                                                                                                                                                                                                                                                                                                                                            |
| 2 | Placebo | RVB20 | 1 | <p>G2582 stomach (6 sections and smaller fragments) these sections of gastric mucosa extend from the surface epithelium to the deep lamina propria and often include small fragments of muscularis mucosa. There is multifocal mild crush artefact. This affects less than 10% of the sections. The sections are of good diagnostic quality. The mucosa is lined by well differentiated tall columnar surface epithelial layer. There is multifocal mild epithelial attenuation. Small amounts of amphiphilic mucoid material are present in the surface mucosa. Occasional clusters of spiral eosinophilic to basophilic bacteria are present on the mucosal surface. These measure up to 30 µm in length. Cellular infiltrate is not noted around these organisms. Multifocally, the surface epithelial cells are absent (ulceration). The underlying lamina propria contains mildly increased numbers of lymphocytes and</p> | <p>G2583: duodenum (14 sections) the sections extend from the surface epithelium to the deep lamina propria, often including muscularis mucosa. The sections are of good diagnostic quality. There is little crush artefact present, which is mild, affecting up to 10% of the sections. Villi are present and are lined by tall columnar well differentiated epithelial cells. There is moderate villous stunting blunting and fusion. Villi are approximately a 3rd to half of there are expected length. There are often double there are expected with. Lamina propria lymphocytes and plasma cells are diffusely mildly increased. The occupying up to 50% of the lamina propria in some high powered fields. There are accompanied by clusters of eosinophils and neutrophils, numbering up to 10 cells of each type per 40 X field. = Crypts are often mildly dilated and contain small amounts of eosinophilic material and</p> | <p>G2584: ileum (14 sections and smaller fragments) these sections of ileal mucosa extend from the surface epithelium to the deep lamina propria, occasionally including muscularis mucosa. The mucosa is lined by tall columnar well differentiated epithelial cells. There is minimal crush artefact present sections are of good diagnostic quality. There are low numbers of intraepithelial lymphocytes present. The lamina propria contains diffusely mildly increased numbers of lymphocytes and plasma cells. Scattered clusters of eosinophils and neutrophils are present within the lamina propria. Multiple submucosal lymphoid follicles are present and appear well differentiated. They have prominent germinal centres and high numbers of dendritic cells mixed with lymphocytes.</p> | <p>G2585: colon (214 sections and smaller fragments) the sections extend from the surface epithelium to the deep lamina propria. They include muscularis mucosa in some areas. There is multifocal mild crush artefact. The sections are of good diagnostic quality. Sections are lined by tall columnar well differentiated epithelial cells. There is multifocal marked epithelial attenuation. Multifocal clusters of neutrophils are noted in the superficial lamina propria in these areas. Expected numbers of lymphocytes and plasma cells are present in the lamina propria. Occasional clusters of eosinophils are present in the lamina propria numbering up to 5 cells per 40 X field. Crypts are well oriented to the mucosal surface. There is minimal crypt contortion. There is multifocal mild crypt dilation.</p> |

|   |         |       |   |                                                                                                                                                                                                                                                                                                                                                                                                                                                                                                                                                                                                                                                                                                                                                                                                                                                                                                                                              |                                                                                                                                                                                                     |  |                                                                                             |
|---|---------|-------|---|----------------------------------------------------------------------------------------------------------------------------------------------------------------------------------------------------------------------------------------------------------------------------------------------------------------------------------------------------------------------------------------------------------------------------------------------------------------------------------------------------------------------------------------------------------------------------------------------------------------------------------------------------------------------------------------------------------------------------------------------------------------------------------------------------------------------------------------------------------------------------------------------------------------------------------------------|-----------------------------------------------------------------------------------------------------------------------------------------------------------------------------------------------------|--|---------------------------------------------------------------------------------------------|
|   |         |       |   | <p>plasma cells, which occupying up to 50% of the lamina propria. This mainly affects pyloric sections. In sections from the body of the stomach, there is diffuse mild atrophy of parietal and chief cells. Small amounts of fibrous connective tissue are present throughout the lamina propria, extending in bands of approximately 2 to 3 cells between individual glandular nests. Occasional clusters of eosinophils and neutrophils are present in the superficial lamina propria. These number up to 5 cells of each type per 40 X field. Fibrous tissue is more prominent in pyloric areas, with bands of fibrous tissue extending between gastric glands in bands of up to 10 cells thick. More prominent neutrophilic and lesser eosinophilic aggregates are present at this site. Dense aggregates of lymphoid follicles are present mainly affecting pyloric samples and occupying up to 50% of the samples in these areas.</p> | <p>necrotic material. Intraepithelial lymphocytes are mildly increased, with up to 20 cells noted per 40 X field. Intraepithelial large granular lymphocytes are multifocally mildly increased.</p> |  |                                                                                             |
| 2 | Placebo | RVB20 | 3 | G3486 (x1) Stomach (12 sections): The sections consist of pyloric and fundic gastric mucosa and extend from the                                                                                                                                                                                                                                                                                                                                                                                                                                                                                                                                                                                                                                                                                                                                                                                                                              | G3487 (x1) Duodenum (11 sections): The sections extend from the surface epithelium to the mid to deep                                                                                               |  | G3488 (x1) Colon (12 sections): The sections extend from the surface epithelium to the deep |

|   |         |       |   |                                                                                                                                                                                                                                                                                                                                                                                                                                                                                                                                                                                                                                                                                                                                                                                                                                            |                                                                                                                                                                                                                                                                                                                                                                                                                                                                                                                                                                                                 |                                                                                                                                                                                                                               |                                                                                                                                                                                                                                                                                                                          |
|---|---------|-------|---|--------------------------------------------------------------------------------------------------------------------------------------------------------------------------------------------------------------------------------------------------------------------------------------------------------------------------------------------------------------------------------------------------------------------------------------------------------------------------------------------------------------------------------------------------------------------------------------------------------------------------------------------------------------------------------------------------------------------------------------------------------------------------------------------------------------------------------------------|-------------------------------------------------------------------------------------------------------------------------------------------------------------------------------------------------------------------------------------------------------------------------------------------------------------------------------------------------------------------------------------------------------------------------------------------------------------------------------------------------------------------------------------------------------------------------------------------------|-------------------------------------------------------------------------------------------------------------------------------------------------------------------------------------------------------------------------------|--------------------------------------------------------------------------------------------------------------------------------------------------------------------------------------------------------------------------------------------------------------------------------------------------------------------------|
|   |         |       |   | <p>surface epithelium to the lamina propria and in one section includes muscularis mucosa. There is minimal crush artefact. The sections are variably orientated and are of good diagnostic quality. The mucosa is lined by tall columnar epithelial cells with no evidence of attenuation or degeneration. There is moderate surface mucus and spiral bacteria are not evident. Low numbers of intraepithelial lymphocytes are present. There is mild, diffuse expansion of lamina propria by mildly increased numbers of lymphocytes and plasma cells. Lymphoid follicles are present within the deep mucosa of multiple sections, accounting for &lt;10% of the biopsy sections. There is a small to moderate amount of fibrous connective tissue (fibrosis) separating the gastric glands of the fundus in the superficial mucosa.</p> | <p>lamina propria and do not include muscularis mucosa. Sections are variably orientated and there is minimal crushing artefact. The samples are of good diagnostic quality. Where longitudinally sectioned villi appear mildly stunted. The villous epithelium is present in a single layer of tall columnar cells and erosion or ulceration is not observed. There is an increased proportion of goblet cells within the surface epithelium. Intraepithelial cells are present in acceptable numbers. There is a mild increase in lymphocytes and plasma cells within the lamina propria.</p> |                                                                                                                                                                                                                               | <p>lamina propria, often including muscularis mucosa. A single layer of columnar epithelium covers the surface and crypts and attenuation, erosion or ulceration is not noted. There is mild goblet cell hyperplasia with mild thickening and distortion of crypts which occasionally contain cellular debris (crypt</p> |
| 2 | Placebo | RVB28 | 1 | <p>H896 (x1) Stomach (12 sections): The sections consist of pyloric and fundic gastric mucosa and extend from the surface epithelium to the lamina propria with one section including muscularis mucosa. There is multifocal mild crush</p>                                                                                                                                                                                                                                                                                                                                                                                                                                                                                                                                                                                                | <p>H897 (x1) Duodenum (12 sections): The sections extend from the surface epithelium to the mid to deep lamina propria. Sections are variably orientated and there is mild to moderate crushing artefact. The samples are of adequate</p>                                                                                                                                                                                                                                                                                                                                                       | <p>H898 (x1) 'Ileum'/colon (3 sections): The sections extend from the surface epithelium and include lamina propria and muscularis mucosa. Sections are variably orientated and villi are not apparent with large numbers</p> | <p>H899 (x1) Colon (9 sections): The sections extend from the surface epithelium to the deep lamina propria, frequently including the muscularis mucosa. The surface mucosa is multifocally lost (eroded)</p>                                                                                                            |

|   |         |       |   |                                                                                                                                                                                                                                                                                                                                                                                                                                                                                                                     |                                                                                                                                                                                                                                                                                                                                                                                                                                                                                                        |                                                                                                                                                                                                                                                                                                                                                                                                                                                                 |                                                                                                                                                                                                                                                                                                                                                                                                                             |
|---|---------|-------|---|---------------------------------------------------------------------------------------------------------------------------------------------------------------------------------------------------------------------------------------------------------------------------------------------------------------------------------------------------------------------------------------------------------------------------------------------------------------------------------------------------------------------|--------------------------------------------------------------------------------------------------------------------------------------------------------------------------------------------------------------------------------------------------------------------------------------------------------------------------------------------------------------------------------------------------------------------------------------------------------------------------------------------------------|-----------------------------------------------------------------------------------------------------------------------------------------------------------------------------------------------------------------------------------------------------------------------------------------------------------------------------------------------------------------------------------------------------------------------------------------------------------------|-----------------------------------------------------------------------------------------------------------------------------------------------------------------------------------------------------------------------------------------------------------------------------------------------------------------------------------------------------------------------------------------------------------------------------|
|   |         |       |   | <p>artefact. The sections are variably orientated and are of good diagnostic quality. The mucosa is lined by tall columnar epithelial cells with no evidence of attenuation or degeneration. Spiral bacteria are observed at the mucosal surface. Low numbers of intraepithelial lymphocytes are present and the number of lymphocytes and plasma cells within the lamina propria are considered within normal limits. There is multifocal expansion of superficial blood vessels by erythrocytes (congestion).</p> | <p>diagnostic quality. Villi appear mildly shortened and the villous epithelium is present in a single layer of tall columnar cells. No erosions or ulcerations are observed. Intraepithelial lymphocytes are present within normal limits. There is a mild increase in lymphocytes and plasma cells within the lamina propria and occasional neutrophils are present. Central lymphatics are within normal limits.</p>                                                                                | <p>of goblet cells present, consistent with colonic mucosa. The surface mucosa is multifocally lost (eroded) with adjacent epithelial cells being attenuated. Underlying superficial lamina propria is minimally expanded by brightly eosinophilic material (presumptive fibrin) and clusters of neutrophils. There is a diffuse, mild increase in lamina propria lymphocytes and plasma cells and intraepithelial lymphocytes appear within normal limits.</p> | <p>with adjacent epithelial cells being attenuated. Underlying superficial lamina propria is minimally expanded by brightly eosinophilic material (presumptive fibrin) and clusters of neutrophils. The lamina propria is loosely arranged (oedematous) and there is a diffuse, mild increase in lamina propria lymphocytes and plasma cells. Crypts are occasionally hyper cellular and distorted (crypt hyperplasia).</p> |
| 2 | Placebo | RVB30 | 1 | <p>H1050, stomach x1. Nine sections comprising fundic and pyloric mucosa are examined. The sections extend from the surface epithelium to the muscularis mucosa, they are well oriented, there is minimal crush artefact and they are of good diagnostic quality. They are histologically unremarkable. No microorganisms are seen and there is no evidence of neoplasia in the examined sections.</p>                                                                                                              | <p>H1051, duodenum x1. Fourteen sections are examined, the sections predominantly comprise transverse profiles of villi, there is mild crush artefact, and they are of moderate diagnostic quality. Villous architecture is difficult to assess but where present they are within normal limits. The villous propria is infiltrated with low numbers of plasma cells and fewer lymphocytes, there is a single crypt abscess in one section. No microorganisms are seen and there is no evidence of</p> |                                                                                                                                                                                                                                                                                                                                                                                                                                                                 | <p>H1052, colon x1. Twelve sections are examined, they extend from the surface epithelium to the muscularis mucosa, they are well oriented, there is minimal crush artefact and they are of good diagnostic quality. There is minimal superficial lamina propria infiltration with lymphocytes and plasma cells and a mild increase in tortuosity of crypts. No microorganisms are seen and there is no evidence of</p>     |

|   |         |       |   |                                                                                                                                                                                                                                                                                                                                                                                                                                                                                                                                                                                                                                                                                                                                                  | neoplasia in the examined sections.                                                                                                                                                                                                                                                                                                                                                                                                                                                                                                                 |  | neoplasia in the examined sections.                                                                                                                                                                                                                                                                                                                                                                                                         |
|---|---------|-------|---|--------------------------------------------------------------------------------------------------------------------------------------------------------------------------------------------------------------------------------------------------------------------------------------------------------------------------------------------------------------------------------------------------------------------------------------------------------------------------------------------------------------------------------------------------------------------------------------------------------------------------------------------------------------------------------------------------------------------------------------------------|-----------------------------------------------------------------------------------------------------------------------------------------------------------------------------------------------------------------------------------------------------------------------------------------------------------------------------------------------------------------------------------------------------------------------------------------------------------------------------------------------------------------------------------------------------|--|---------------------------------------------------------------------------------------------------------------------------------------------------------------------------------------------------------------------------------------------------------------------------------------------------------------------------------------------------------------------------------------------------------------------------------------------|
| 2 | Placebo | RVB31 | 1 | Stomach; H1124 (x1): Ten sections are examined that are composed of fundic and pyloric mucosa and lamina propria and most sections are of good diagnostic quality. Diffusely fundic glands are separated by a mild increase in proprial fibrous tissue and the lamina propria is infiltrated by mildly increased numbers of lymphocytes, plasma cells, fewer eosinophils and occasional neutrophils. Diffusely pyloric glands are separated by a marked increase in proprial fibrous tissue and the lamina propria is infiltrated by mildly increased numbers of lymphocytes, plasma cells and occasional neutrophils. There is abundant mucus on the mucosal surface. There is no evidence of mucosal erosion or ulceration in either location. | Duodenum; H1125 (x1): Fifteen sections are examined that are composed of mucosa and superficial lamina propria, frequently sections are superficial/tangential. Four sections are of reasonable diagnostic quality. The lamina propria is infiltrated by mildly increased numbers of plasma cells with fewer lymphocytes and occasional eosinophils and neutrophils. There is mild villous atrophy, occasional mild dilation of villous lacteals and mucosal glands are mildly hyperplastic. There is no evidence of mucosal erosion or ulceration. |  | Colon; H1126 (x1): Ten sections are examined that are composed of mucosa, lamina propria and muscularis mucosa. The majority of sections are of good diagnostic quality. The lamina propria is moderately expanded by increased amounts of fibrous tissue that is infiltrated by occasional neutrophils. Diffusely there is mild goblet cell hyperplasia and abundant surface mucus. There is no evidence of mucosal erosion or ulceration. |
| 2 | Placebo | RVB31 | 3 |                                                                                                                                                                                                                                                                                                                                                                                                                                                                                                                                                                                                                                                                                                                                                  |                                                                                                                                                                                                                                                                                                                                                                                                                                                                                                                                                     |  |                                                                                                                                                                                                                                                                                                                                                                                                                                             |
| 2 | Placebo | RVB34 | 1 | H2698, stomach x1. 12 sections of pyloric and fundic mucosa are examined, the majority comprise well orientated sections extending from the surface epithelium to                                                                                                                                                                                                                                                                                                                                                                                                                                                                                                                                                                                | H2699, duodenum x 1. 13 sections of duodenal mucosa are examined, four of these extend from the surface epithelium to the muscularis mucosa, there is minimal crush                                                                                                                                                                                                                                                                                                                                                                                 |  | H2700, colon x 1. 11 sections of colonic mucosa are examined, they extend from the surface epithelium to the muscularis mucosa, there is mild crush artefact,                                                                                                                                                                                                                                                                               |

|   |         |       |   |                                                                                                                                                                                                                                                                                                            |                                                                                                                                                                                                                                                                                                                                                                                                                                                                                                                                                             |                                                                                                                                                                                                                                                                                                                                                                                                                                                             |                                                                                                                                                                                                                                                                                                                                                                                                                                                     |
|---|---------|-------|---|------------------------------------------------------------------------------------------------------------------------------------------------------------------------------------------------------------------------------------------------------------------------------------------------------------|-------------------------------------------------------------------------------------------------------------------------------------------------------------------------------------------------------------------------------------------------------------------------------------------------------------------------------------------------------------------------------------------------------------------------------------------------------------------------------------------------------------------------------------------------------------|-------------------------------------------------------------------------------------------------------------------------------------------------------------------------------------------------------------------------------------------------------------------------------------------------------------------------------------------------------------------------------------------------------------------------------------------------------------|-----------------------------------------------------------------------------------------------------------------------------------------------------------------------------------------------------------------------------------------------------------------------------------------------------------------------------------------------------------------------------------------------------------------------------------------------------|
|   |         |       |   | the muscularis mucosa, there is moderate crush artefact, they are adequate for examination. There is a mild increase in lamina propria connective tissue and corresponding glandular atrophy. There is no evidence of erosion, ulceration, significant inflammation or neoplasia in the examined sections. | artefact, they are adequate for examination. The remainder comprise cross sections of villi. Villous profiles are diffusely mildly broadened and shortened. The villous propria is multifocally mildly infiltrated with aggregates of plasma cells, fewer lymphocytes and rare neutrophils.                                                                                                                                                                                                                                                                 |                                                                                                                                                                                                                                                                                                                                                                                                                                                             | they are adequate for examination. The lamina propria is mildly expanded by oedema and mildly infiltrated with low numbers of lymphocytes and plasma cells.                                                                                                                                                                                                                                                                                         |
| 2 | Placebo | RVB34 | 3 | Stomach, H3559 x 1: One tissue sample is examined and consists of pyloric mucosa that extends to the deep lamina propria. There is mild proprial fibrosis and a mild increase of neutrophils and eosinophils. There is no evidence of Helicobacter spp. or neoplasia within the examined tissues.          | Duodenum, H3559 x 1: Ten tissue segments and fragments are examined. They are for good diagnostic quality. There is moderate crush artefact that affect 15% of the examined tissue. They extend from the mucosa to the deep lamina Propria and consist of longitudinal and very superficial transverse sections of the villous tips. In longitudinal sections villous tips are of expected length and thickness. Numbers of proprial lymphocytes and plasm a cells are within normal limits. There is no evidence of neoplasia within the examined tissues. | Ileum, H3560 x 1: Twelve poorly oriented and partially folded tissue sections and fragments are examined. There is moderate crush artefact that affects 15% of the examined tissue. They extend from the mucosa to the deep lamina propria and occasionally contain muscularis mucosae. Villous profiles are of expected length and thickness. Proprial neutrophils are minimally increased. There is no evidence of neoplasia within the examined tissues. | Colon, H3561 x 1: Twelve tissue sections are examined that extend from the mucosa to the deep lamina propria and occasionally contain muscularis mucosae. They are of good diagnostic quality and contain minimal crush artefact. The tunica mucosa is line by a columnar well-differentiated epithelium. Numbers if proprial lymphocytes and plasma cells are within normal limits. There is no evidence of neoplasia within the examined tissues. |

TABLE A47. Clinical pathology results - Group 2. Diagnosis and comments.

| Group | Treatment | Patient No. | Visit No. | Tissue - Microscopic Diagnosis                                                                                                                                                                | Tissue - Pathologist Comment                                                                                                                                                                                                                                                                                                                                                                                                                                                                                                                                                               | Tissue - Investigator Comment                                                                           |
|-------|-----------|-------------|-----------|-----------------------------------------------------------------------------------------------------------------------------------------------------------------------------------------------|--------------------------------------------------------------------------------------------------------------------------------------------------------------------------------------------------------------------------------------------------------------------------------------------------------------------------------------------------------------------------------------------------------------------------------------------------------------------------------------------------------------------------------------------------------------------------------------------|---------------------------------------------------------------------------------------------------------|
| 2     | Placebo   | RVB02       | 1         | 1. Duodenum; diffuse, mild, lymphoplasmacytic infiltrate<br>2. Ileum; mild eosinophilic ileitis with mild villus atrophy<br>3. Colon; diffuse, mild eosinophilic colitis with proprial oedema | Histopathological examination of the received tissues reveals the presence of mild inflammatory changes within the duodenum, ileum and colon. These changes are mild and non-specific, but could be compatible with the clinical diagnosis of inflammatory bowel disease. Many of these cases are idiopathic however potential contributory factors to consider include aberrant immune responses to luminal microflora or dietary antigens or underlying systemic disease. Mucosal ulceration, glandular atrophy and/or fibrosis or neoplastic disease is not observed in these sections. | Mild IBD                                                                                                |
| 2     | Placebo   | RVB02       | 3         | Duodenum; mild lymphoplasmacytic infiltrate<br>Ileum; sample non-diagnostic<br>Colon; mild neutrophilic and lymphoplasmacytic colitis with mucosal fibrosis and crypt hyperplasia             | Histopathological examination of the received tissues reveals a mild neutrophilic and lymphoplasmacytic colitis. The changes in the duodenum are mild. The ileal sample could not be assessed in detail due to the extent of squash artefact within the submitted samples.                                                                                                                                                                                                                                                                                                                 | Still showing signs of inflammation with fibrosis, therefore tis may be potentially chronically present |



|   |         |       |   |                                                                                                                                                                                                                                                                                                                                                                                                                                                                                |                                                                                                                                                                                                                                                                                                                                                                                                                                                                                                                                                                                                                                                                  |                                                |
|---|---------|-------|---|--------------------------------------------------------------------------------------------------------------------------------------------------------------------------------------------------------------------------------------------------------------------------------------------------------------------------------------------------------------------------------------------------------------------------------------------------------------------------------|------------------------------------------------------------------------------------------------------------------------------------------------------------------------------------------------------------------------------------------------------------------------------------------------------------------------------------------------------------------------------------------------------------------------------------------------------------------------------------------------------------------------------------------------------------------------------------------------------------------------------------------------------------------|------------------------------------------------|
| 2 | Placebo | RVB05 | 1 | <p>F3398 (x1): Gastritis, lymphocytic to plasmacytic, chronic, multifocal, moderate, stomach with marked lymphoid follicular hyperplasia</p> <p>F3399 (x 1): Enteritis, lymphocytic to plasmacytic, chronic, multifocal, moderate, duodenum</p> <p>F3400 (x 1): Enteritis, lymphocytic to plasmacytic, chronic, multifocal, mild with lymphangiectasia, multifocal, marked, ileum</p> <p>F3401 (x1): Colitis, lymphocytic to plasmacytic, chronic, multifocal, mild, colon</p> | <p>These sections of gastrointestinal mucosa are chronically inflamed with the predominance of inflammation present within the small intestine. The character of the inflammatory infiltrate and concurrence of crypt abscess formation is consistent with a diagnosis of inflammatory bowel disease (IBD). Indeed, the formation of crypt abscesses and marked dilation of lymphatics within the small intestinal mucosa is often, as in this case, associated with a protein losing enteropathy. There is no evidence of neoplasia within the examined sections.</p>                                                                                           | <p>Consistent with PLE/chronic enteropathy</p> |
| 2 | Placebo | RVB09 | 1 | <p>1. Duodenum; diffuse, moderate lymphoplasmacytic and neutrophilic duodenitis with crypt abscessation and marked villous atrophy</p> <p>2. Ileum; moderate lymphoplasmacytic and histiocytic enteritis with marked villous atrophy</p> <p>3. Colon; diffuse, moderate lymphoplasmacytic colitis with proprial oedema</p>                                                                                                                                                     | <p>Histopathological examination of the received tissues reveals the presence of moderate inflammatory changes within the duodenum, ileum and colon alongside marked villous atrophy of the duodenum and ileum. These changes are non-specific and generally consistent with the chronicity of the clinical signs described in this dog however no overt fibrosis is apparent. Many of these cases are idiopathic however potential contributory factors to consider include aberrant immune responses to luminal microflora or dietary antigens or underlying systemic disease. Mucosal ulceration or neoplastic disease is not observed in these sections.</p> | <p>Consistent with IBD</p>                     |

|   |         |       |   |                                                                                                                                                                                                                                                                                                        |                                                                                                                                                                                                                                                                                                                                                                                                                                                                                                                                                                                                                                                               |                                                                                                   |
|---|---------|-------|---|--------------------------------------------------------------------------------------------------------------------------------------------------------------------------------------------------------------------------------------------------------------------------------------------------------|---------------------------------------------------------------------------------------------------------------------------------------------------------------------------------------------------------------------------------------------------------------------------------------------------------------------------------------------------------------------------------------------------------------------------------------------------------------------------------------------------------------------------------------------------------------------------------------------------------------------------------------------------------------|---------------------------------------------------------------------------------------------------|
| 2 | Placebo | RVB11 | 1 | <p>1. Duodenum; diffuse, chronic-active, marked, mixed (lymphoplasmacytic, eosinophilic and neutrophilic) duodenitis with multifocal necrosis</p> <p>2. Ileum; diffuse, moderate, lymphoplasmacytic, ileitis</p>                                                                                       | <p>Examination of the received tissues reveals marked duodenitis and moderate ileitis. The changes which include a mixed inflammatory infiltrate (lymphoplasmacytic, neutrophilic and eosinophilic) are suggestive of proximal small intestinal inflammatory bowel disease which may be worsened by dysbiosis in this case. A Giemsa stain to characterise the morphology of the microorganisms present is pending and will be reported as an addendum when complete. There are minimal changes, unlikely to be clinically significant, within the sections of stomach and colon examined. There is no evidence of neoplasia within the examined sections</p> | Results consistent with IBD                                                                       |
| 2 | Placebo | RVB11 | 3 | <p>1. Stomach; no significant histopathological abnormality detected</p> <p>2. Duodenum; minimal chronic lymphoplasmacytic proprial inflammation</p> <p>3. Ileum; minimal chronic lymphoplasmacytic proprial inflammation</p> <p>4. Colon; minimal chronic lymphoplasmacytic proprial inflammation</p> | <p>Histopathological examination of the received tissues reveals only the presence of minimal proprial inflammation within the duodenum, ileum and colon, consistent with the improvement of clinical signs. There is no evidence of neoplasia in the examined sections</p>                                                                                                                                                                                                                                                                                                                                                                                   | Marked improvement in results                                                                     |
| 2 | Placebo | RVB12 | 1 | <p>Stomach: within normal limits</p> <p>Duodenum: within normal limits</p> <p>Ileum: mild catarrhal eosinophilic lymphoplasmacytic enteritis</p> <p>Colon: mild catarrhal lymphoplasmacytic colitis</p>                                                                                                | <p>Histopathological examination of the received tissues reveals the presence of a mild eosinophilic lymphoplasmacytic enteritis and lymphoplasmacytic colitis. The cause of the pathology was not evident, however there was no evidence of neoplasia or pathogens on the examined sections.</p>                                                                                                                                                                                                                                                                                                                                                             | <p>Stomach and duodenum diagnosis: NCS.</p> <p>Ileum and Colon Diagnosis: Consistent with IBD</p> |

|   |         |       |   |                                                                                                                                                                                                                                                                                                                                                                                                                                                                                                                                                                                                                                                                                       |                                                                                                                                                                                                                                                                                                                                                                                                                                                                                                                                                                                                                                                                                                                                                                                                                                                                                                                                                        |                     |
|---|---------|-------|---|---------------------------------------------------------------------------------------------------------------------------------------------------------------------------------------------------------------------------------------------------------------------------------------------------------------------------------------------------------------------------------------------------------------------------------------------------------------------------------------------------------------------------------------------------------------------------------------------------------------------------------------------------------------------------------------|--------------------------------------------------------------------------------------------------------------------------------------------------------------------------------------------------------------------------------------------------------------------------------------------------------------------------------------------------------------------------------------------------------------------------------------------------------------------------------------------------------------------------------------------------------------------------------------------------------------------------------------------------------------------------------------------------------------------------------------------------------------------------------------------------------------------------------------------------------------------------------------------------------------------------------------------------------|---------------------|
| 2 | Placebo | RVB20 | 1 | <p>G2582: gastritis, erosive and ulcerative, neutrophilic, eosinophilic, lymphoplasmacytic, multifocal, moderate, chronic with lymphoid hyperplasia, and fibrosis, multifocal, moderate; stomach</p> <p>G2583: enteritis, lymphoplasmacytic, neutrophilic, eosinophilic, multifocal to coalescing, moderate, chronic with villous atrophy, multifocal, moderate; duodenum</p> <p>G2584: ileitis, lymphoplasmacytic, neutrophilic, eosinophilic, multifocal to coalescing, moderate, chronic with villous atrophy and lymphoid hyperplasia, multifocal, moderate to marked; ileum</p> <p>G2585: colitis, erosive, neutrophilic, eosinophilic, multifocal, moderate, chronic; colon</p> | <p>The most severe areas of inflammation in these sections are present within the small intestine and gastric pylorus region. There is evidence of a chronic mixed gastroenteritis. Mildly to moderately increased numbers of eosinophils are present, which may reflect a hypersensitivity response. Mildly to moderately increased numbers of neutrophils are also noted, which would likely indicate a reaction to luminal bacteria. There is similar inflammation present in the other areas of the stomach and the colon, with areas of ulceration present in both sites. I did not detect the presence of neoplasia in any of these sections. There are some Helicobacter species noted in the stomach mucosa, however, no detectable cellular response is evident. Prominent numbers of large granular lymphocytes are present within the surface mucosa of the duodenum, which may indicate an innate immune response to surface antigens.</p> | Consistent with IBD |
|---|---------|-------|---|---------------------------------------------------------------------------------------------------------------------------------------------------------------------------------------------------------------------------------------------------------------------------------------------------------------------------------------------------------------------------------------------------------------------------------------------------------------------------------------------------------------------------------------------------------------------------------------------------------------------------------------------------------------------------------------|--------------------------------------------------------------------------------------------------------------------------------------------------------------------------------------------------------------------------------------------------------------------------------------------------------------------------------------------------------------------------------------------------------------------------------------------------------------------------------------------------------------------------------------------------------------------------------------------------------------------------------------------------------------------------------------------------------------------------------------------------------------------------------------------------------------------------------------------------------------------------------------------------------------------------------------------------------|---------------------|

|   |         |       |   |                                                                                                                                                                                                                                                                                                |                                                                                                                                                                                                                                                                                                                                                                                                                                                                                                                                                                                                                                                                                                                                                                             |                                                         |
|---|---------|-------|---|------------------------------------------------------------------------------------------------------------------------------------------------------------------------------------------------------------------------------------------------------------------------------------------------|-----------------------------------------------------------------------------------------------------------------------------------------------------------------------------------------------------------------------------------------------------------------------------------------------------------------------------------------------------------------------------------------------------------------------------------------------------------------------------------------------------------------------------------------------------------------------------------------------------------------------------------------------------------------------------------------------------------------------------------------------------------------------------|---------------------------------------------------------|
| 2 | Placebo | RVB20 | 3 | Stomach; diffuse, mild, lymphoplasmacytic gastritis with mild fibrosis and glandular atrophy<br>Duodenum; diffuse, mild, lymphoplasmacytic duodenitis with mild villous stunting<br>Colon; diffuse, mild, lymphoplasmacytic and eosinophilic colitis with mild fibrosis and crypt abscessation | The previous endoscopic biopsies and report have been reviewed alongside the current submission. There is evidence of ongoing mild, lymphoplasmacytic gastroenteritis and colitis throughout the examined sections, consistent with an ongoing inflammatory bowel disease. Neutrophils or eosinophils within the lamina propria are not identified within the stomach or duodenum with only few eosinophils observed within the colon. There is no evidence of microbial organisms or neoplasia. Progression of the inflammatory disease process is not apparent and there is overall decrease in the amount and type of the inflammatory cell component.                                                                                                                   | Improved from last biopsies, suggestive of improved IBD |
| 2 | Placebo | RVB28 | 1 | Stomach; no pathologic abnormalities identified<br>Duodenum; mild lymphoplasmacytic and neutrophilic duodenitis with mild villous blunting<br>Colon; moderate, multifocal, erosive, lymphoplasmacytic and neutrophilic colitis with mild multifocal crypt hyperplasia                          | Microscopic examination of the submitted endoscopic gastrointestinal biopsies identifies mild changes within the duodenum and moderate changes within the colon. The stomach is considered histologically normal with the potential for congestion resulting in a macroscopically visible hyperaemia. The significance of spiral bacteria within the stomach of dogs currently remains unknown however there is no associated inflammation in this case. Villi are not appreciable on the submitted ileal sections and as such are more consistent with coming from a proximal colonic location. The changes observed within the duodenum and colon are considered non-specific with no infectious causes or evidence of neoplasia identified within the examined sections. | Findings consistent with IBD                            |
| 2 | Placebo | RVB30 | 1 | Stomach; no significant changes<br>Duodenum; mild mucosal plasmacytic inflammation<br>Colon; minimal mucosal lymphoplasmacytic inflammation                                                                                                                                                    | Histopathological examination of the submitted tissue reveals mild changes in the intestine of this dog, which, if other causes are ruled out, could be compatible with a diagnosis of IBD. There is no evidence of neoplasia in the examined sections.                                                                                                                                                                                                                                                                                                                                                                                                                                                                                                                     |                                                         |

A study investigating the efficacy of BIOEC2015 in reducing the clinical signs associated with canine inflammatory bowel disease (IBD)

FINAL

|   |         |       |   |                                                                                                                                                                                                                                                                                                                                      |                                                                                                                                                                                                                                                                                                                                                                                                                                                                                                                      |                                     |
|---|---------|-------|---|--------------------------------------------------------------------------------------------------------------------------------------------------------------------------------------------------------------------------------------------------------------------------------------------------------------------------------------|----------------------------------------------------------------------------------------------------------------------------------------------------------------------------------------------------------------------------------------------------------------------------------------------------------------------------------------------------------------------------------------------------------------------------------------------------------------------------------------------------------------------|-------------------------------------|
| 2 | Placebo | RVB31 | 1 | <p>Stomach; moderate proprial fibrosis with mild mixed proprial inflammation</p> <p>Duodenum; mild villous atrophy with mild mixed proprial inflammation</p> <p>Colon; moderate proprial fibrosis with occasional neutrophils</p>                                                                                                    | <p>Examination of the received tissues reveals mild, chronic inflammatory changes within the stomach, duodenum and colon. There was no evidence of neoplasia in the examined sections and the inflammation could be consistent with inflammatory bowel disease if other differentials have been ruled out.</p>                                                                                                                                                                                                       | <p>Biopsies consistent with IBD</p> |
| 2 | Placebo | RVB31 | 3 | <p>Duodenum; histologically unremarkable</p> <p>Colon; histologically unremarkable</p>                                                                                                                                                                                                                                               | <p>The tissues are affected by what is presumed to be freeze thaw artefact, but within these limits there are no significant changes in the examined sections</p>                                                                                                                                                                                                                                                                                                                                                    |                                     |
| 2 | Placebo | RVB34 | 1 | <p>Stomach; minimal to mild glandular atrophy and fibrosis</p> <p>Duodenum; mild duodenitis, plasmacytic, lymphocytic and neutrophilic</p> <p>Colon; minimal to mild lymphoplasmacytic infiltration.</p>                                                                                                                             | <p>Histological examination reveals a range of changes in the tissues of this dog. The changes in the stomach are mild and non-specific and unlikely to have been functionally significant. The changes in the duodenum may have been functionally significant, they may be compatible with IBD if other causes have been ruled out.</p> <p>The changes in the colon may also be consistent with IBD. There is no evidence of neoplasia and no infectious organisms have been detected in the examined sections.</p> |                                     |
| 2 | Placebo | RVB34 | 3 | <p>1. Stomach, pylorus; multifocal, minimal, proprial fibrosis with minimal, multifocal, neutrophilic, eosinophilic, infiltrates</p> <p>2. Duodenum; without significant histopathological changes</p> <p>3. Ileum; multifocal, minimal, neutrophilic infiltrates</p> <p>4. Colon; without significant histopathological changes</p> | <p>Microscopic examination reveals that one of the samples submitted as duodenum is in fact pyloric mucosa with minimal fibrosis and very few proprial neutrophils and eosinophils. The samples from the ileum are poorly oriented but within these limits and similarly to the duodenum and colon, there are no significant histopathological changes in the examined tissues.</p>                                                                                                                                  |                                     |

## APPENDIX 2

Table 1. Descriptive statistics of demographic variables (Group, Age, Gender, and Breed) with data summary after withdrawals within parentheses.

*(A) Dog demographics (20 experimental units including 7 withdrawals)*

| <b>Group</b> | <b>Age in months<br/>(at Visit 1)</b> | <b>Gender</b> | <b>Breed</b>                          |
|--------------|---------------------------------------|---------------|---------------------------------------|
| <b>1</b>     | 25                                    | FN            | Lurcher                               |
| <b>1</b>     | 44                                    | FN            | Cross Breed                           |
| <b>1</b>     | 56                                    | FE            | Bearded Collie (withdraw)             |
| <b>1</b>     | 81                                    | FN            | Staffordshire Bull Terrier            |
| <b>1</b>     | 120                                   | FN            | Cocker Spaniel                        |
| <b>1</b>     | 14                                    | ME            | Cockapoo                              |
| <b>1</b>     | 29                                    | ME            | Border Collie                         |
| <b>1</b>     | 53                                    | MN            | Labrador Retriever                    |
| <b>1</b>     | 91                                    | MN            | Labrador Retriever                    |
| <b>1</b>     | 131                                   | MN            | Staffordshire Bull Terrier (withdraw) |
| <b>2</b>     | 19                                    | FE            | Whippet (withdraw)                    |
| <b>2</b>     | 54                                    | FE            | German Shepherd (withdraw)            |
| <b>2</b>     | 22                                    | ME            | Boxer                                 |
| <b>2</b>     | 23                                    | ME            | Border Collie                         |

|          |    |    |                                       |
|----------|----|----|---------------------------------------|
| <b>2</b> | 23 | MN | French Bulldog (withdraw)             |
| <b>2</b> | 36 | ME | Collie X                              |
| <b>2</b> | 36 | MN | Labradoodle                           |
| <b>2</b> | 58 | MN | Lhasa Apso                            |
| <b>2</b> | 73 | MN | Staffordshire Bull Terrier (withdraw) |
| <b>2</b> | 80 | ME | German Shepherd (withdraw)            |

*(B) Contingency table by group vs. gender (frequency after withdrawals within parentheses)*

| <b>Group</b><br><b>Gender</b> | <b>1</b> | <b>2</b> | <b>Row Total</b> |
|-------------------------------|----------|----------|------------------|
| <b>F (FE or FN)</b>           | 5 (4)    | 2 (0)    | 7 (4)            |
| <b>M (ME or MN)</b>           | 5 (4)    | 8 (5)    | 13 (9)           |
| <b>Column Total</b>           | 10 (8)   | 10 (5)   | 20 (13)          |

*(C) Descriptive statistics of age (in months at Visit 1) by group and gender*

| <b>Group</b><br><b>Gender</b> | <b>1</b> | <b>2</b> | <b>Gender average <math>\pm</math> sd</b> |
|-------------------------------|----------|----------|-------------------------------------------|
|                               |          |          |                                           |

|                               |                                  |                                  |                                  |
|-------------------------------|----------------------------------|----------------------------------|----------------------------------|
| <b>F</b><br><b>(FE or FN)</b> | 65.20 ± 36.75<br>(67.50 ± 42.02) | 36.50 ± 24.75<br>(0)             | 57.00 ± 34.62<br>(67.50 ± 42.02) |
| <b>M</b><br><b>(ME or MN)</b> | 63.60 ± 47.60<br>(46.75 ± 33.59) | 43.88 ± 23.38<br>(35.00 ± 14.53) | 51.46 ± 34.26<br>(40.22 ± 23.81) |
| <b>Group average ± sd</b>     | 64.40 ± 40.10<br>(57.13 ± 36.92) | 42.40 ± 22.43<br>(35.00 ± 14.53) | 53.40 ± 33.58<br>(48.62 ± 31.48) |

Figure 1. Group comparison of average (±sd) CCECAI and CIBDAI profiles

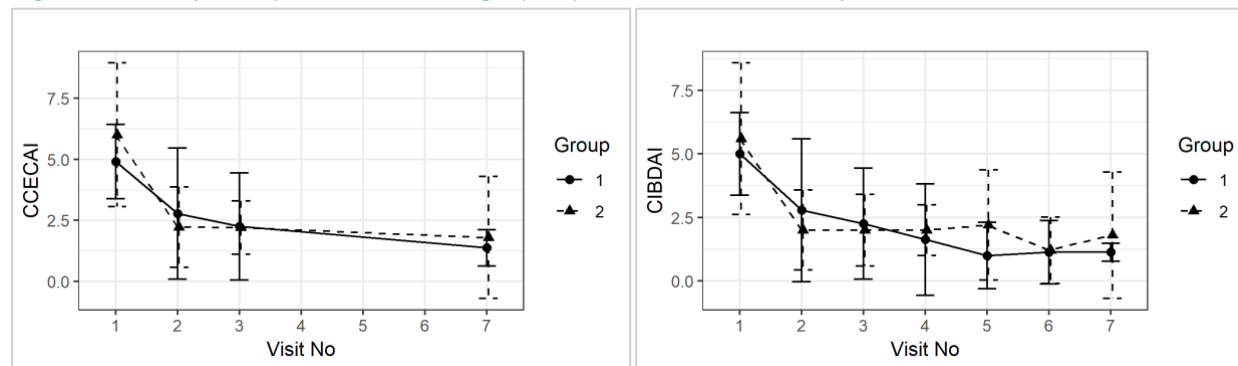



Figure 2. Group comparison of average ( $\pm$ sd) profiles for blood samples

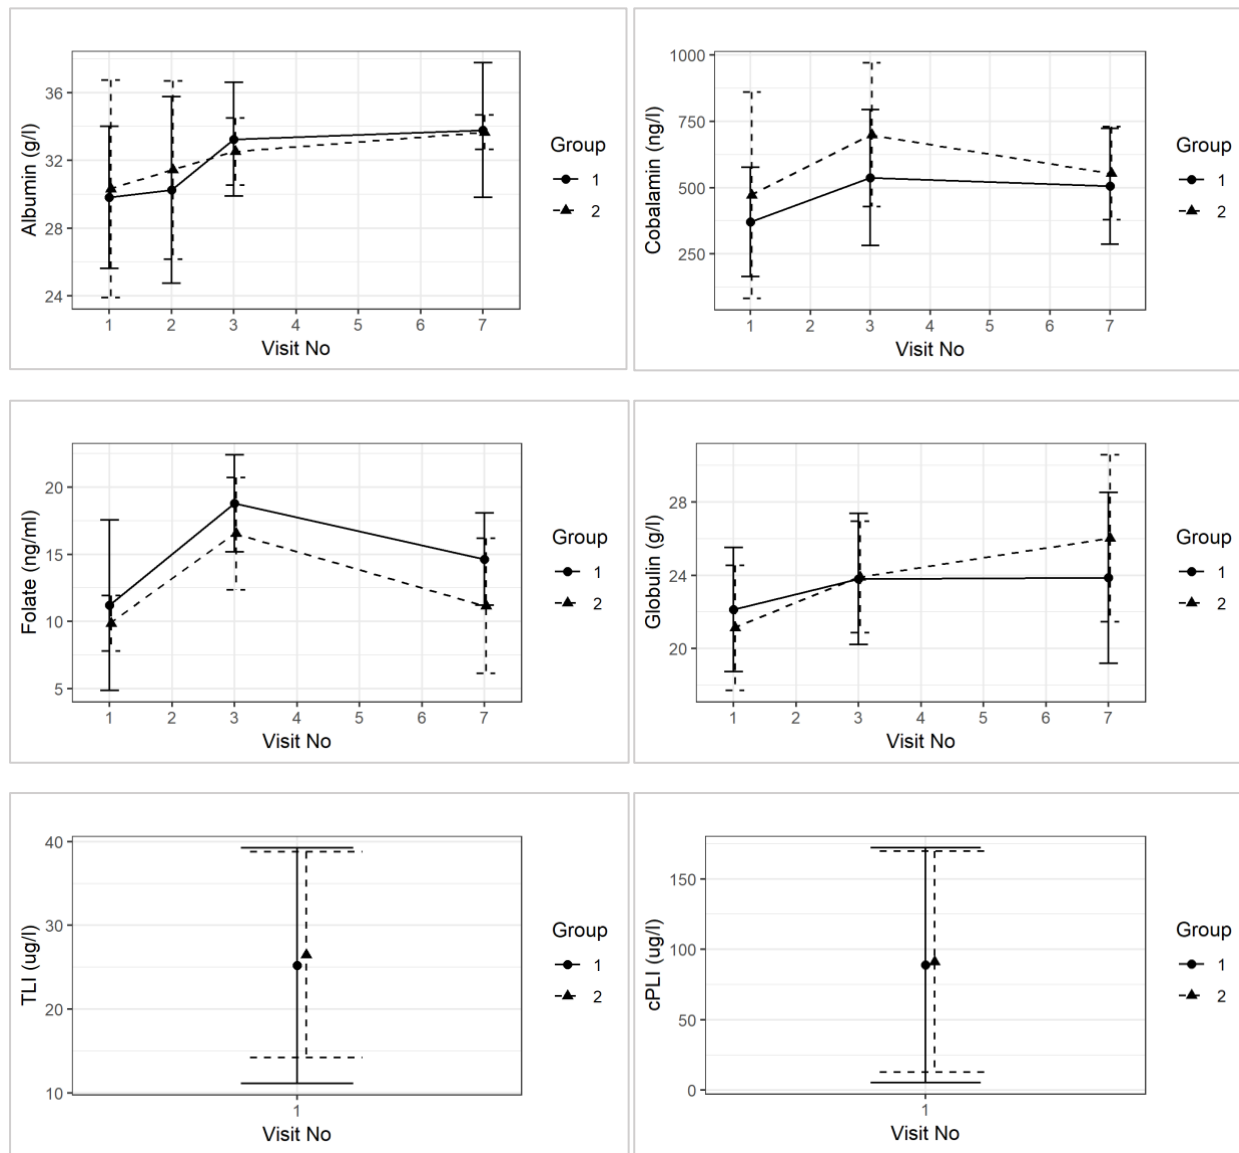

A study investigating the efficacy of BIOEC2015 in reducing the clinical signs associated with canine inflammatory bowel disease (IBD)

Figure 3. Group comparison of average ( $\pm$ sd) Endoscopy Score D, I, C profiles

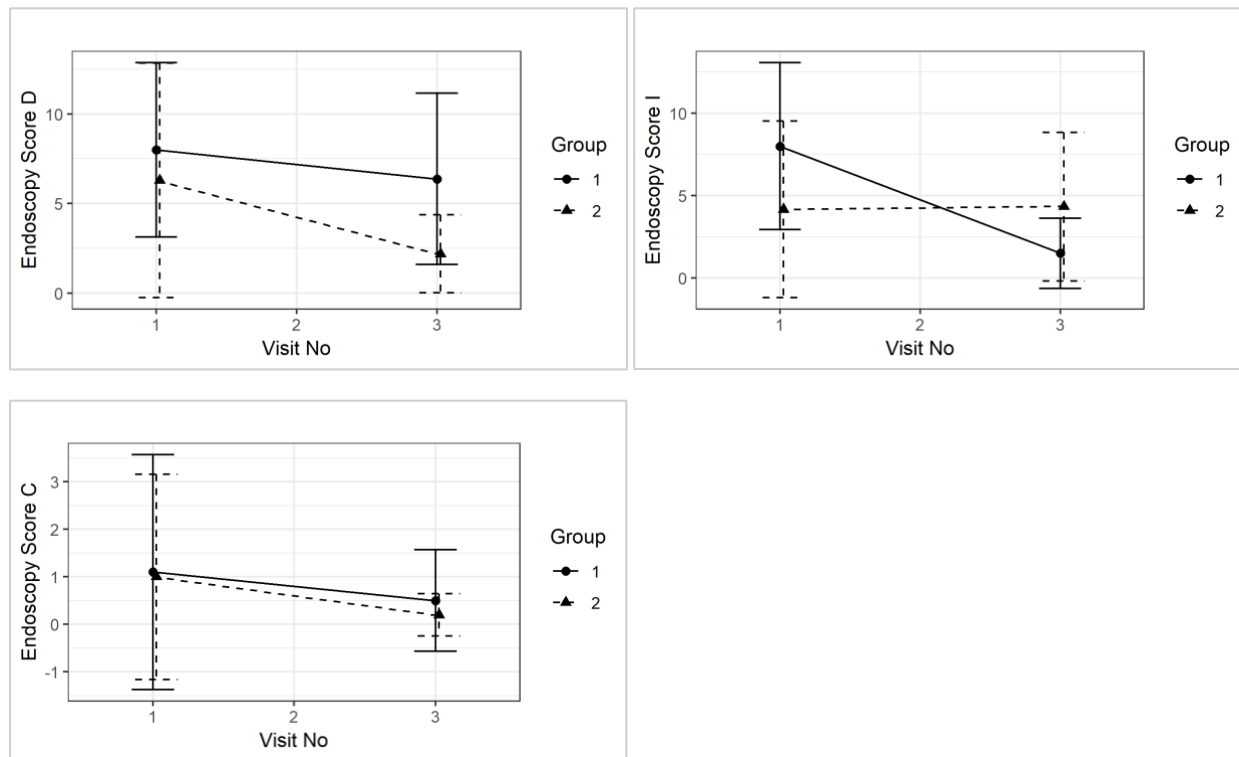

Figure 4. Group comparison of average ( $\pm$ sd) profiles for WSAVA scores

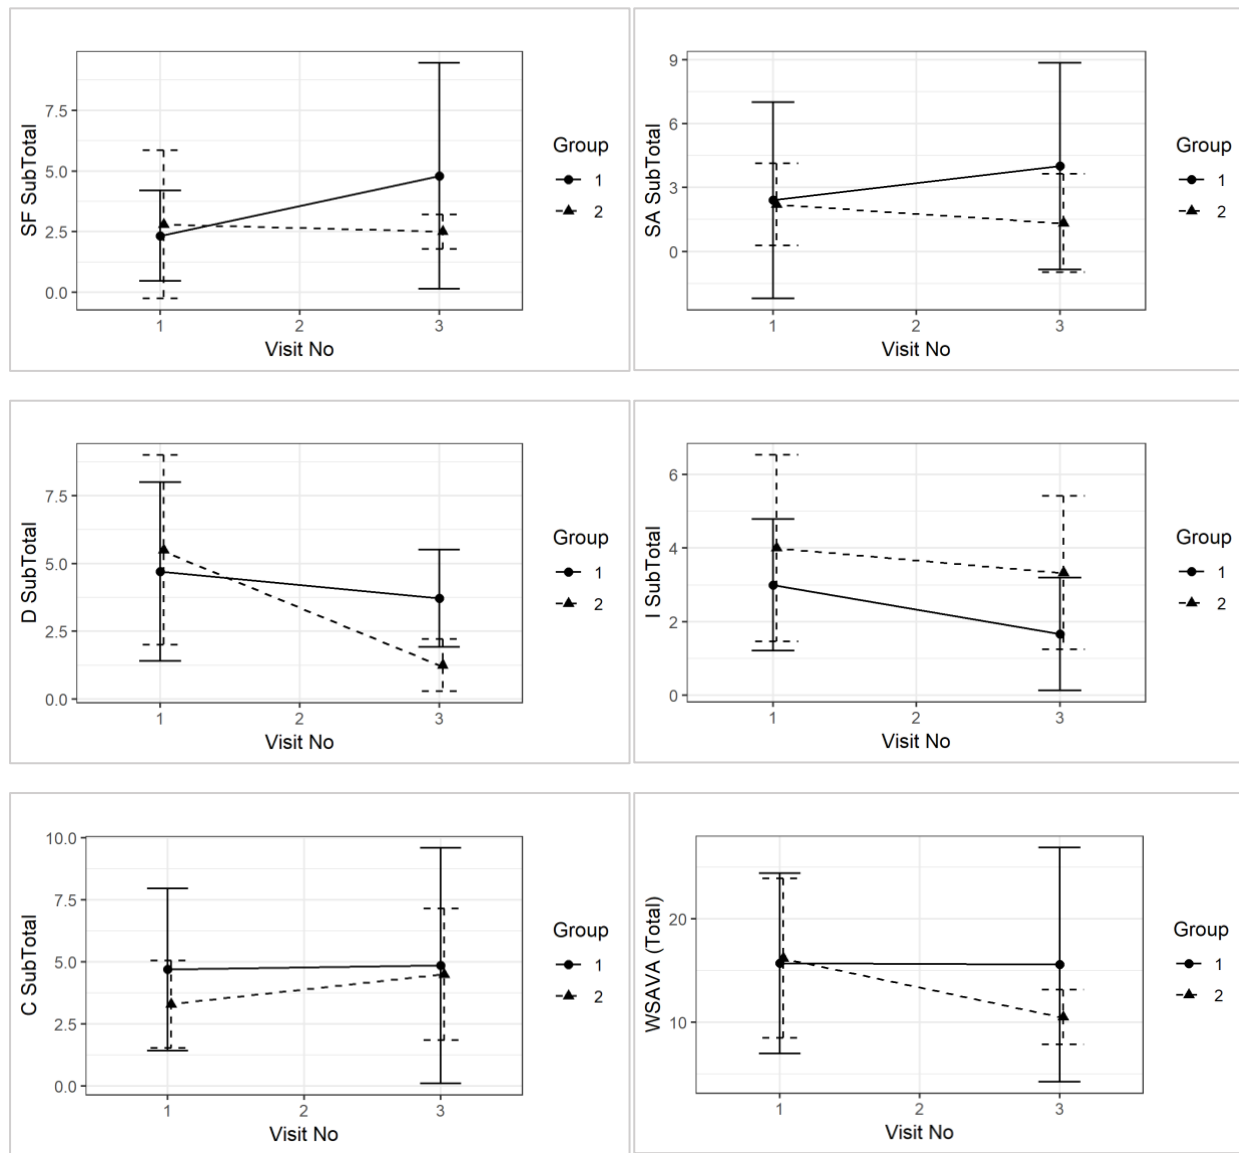

A study investigating the efficacy of BIOEC2015 in reducing the clinical signs associated with canine inflammatory bowel disease (IBD)

Figure 5. Pearson correlation coefficients (combining all the visits and groups 1 and 2) using *corrplot* package in R.

Positive correlations are displayed in blue color and negative correlations are in red. Additional colors (corresponding to their correlation values) are added in the plot when the test for linear association between paired variables results in p-value < 0.05 (p-values are not shown in the plot).

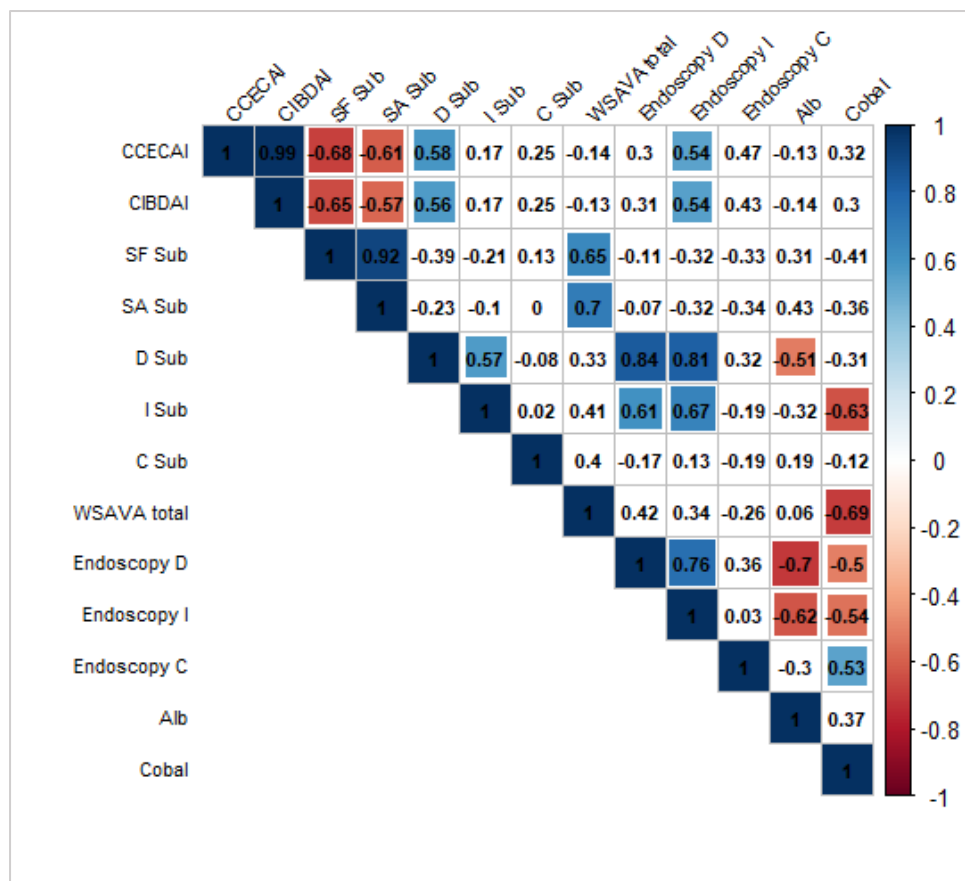

Supplement: pone.0250681.s001.pdf [file pone.0250681.s001.pdf]
