# Supplementary material for: Clinical efficacy of prebiotics and glycosaminoglycans versus placebo In dogs with food responsive enteropathy receiving a hydrolyzed diet: A pilot study
Source: PubMed Central journal article supplement (PMC8530283; doi:10.1371/journal.pone.0250681), 2021-10-21

Total number of experimental units = 20 (including 3 withdraws, RVB07 (Group=1), RVB09 (Group=2), RVB12 (Group=2))

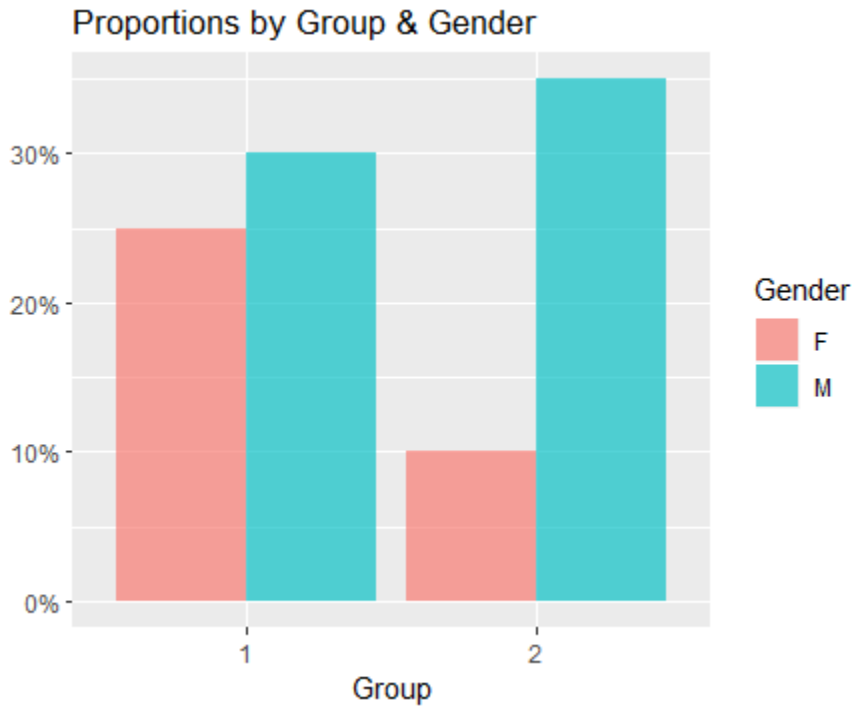

Total Observations in Table: 20

| Gender       | Group |       | Row Total |
|--------------|-------|-------|-----------|
|              | 1     | 2     |           |
| F            | 5     | 2     | 7         |
|              | 0.250 | 0.100 | 0.350     |
| M            | 6     | 7     | 13        |
|              | 0.300 | 0.350 | 0.650     |
| Column Total | 11    | 9     | 20        |
|              | 0.550 | 0.450 |           |

Age in Months (at initial visit, "Visit=1" ONLY)

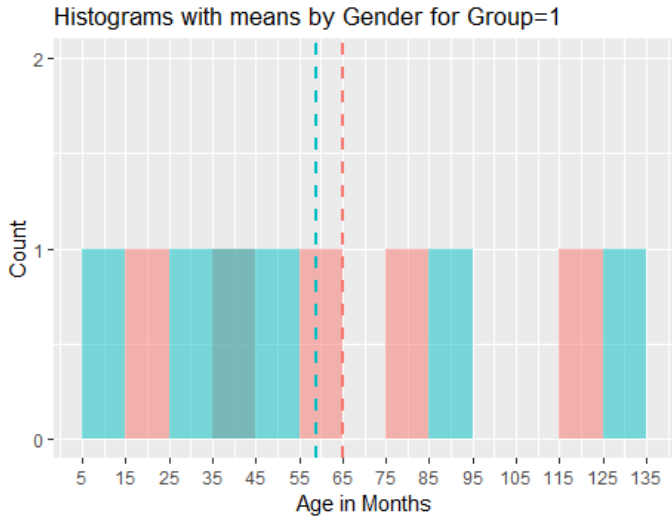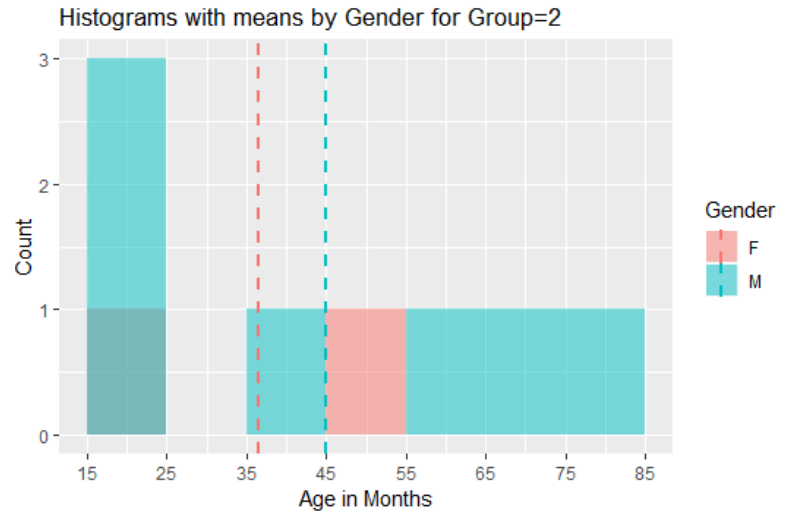

| Group | Gender | Age.mean | Age.sd |
|-------|--------|----------|--------|
| 1     | F      | 65.20    | 36.75  |
| 1     | M      | 59.00    | 44.04  |
| 2     | F      | 36.50    | 24.75  |
| 2     | M      | 45.00    | 25.02  |

Proportions by Gender, Group and Breed

| Gender | Group | Breed | n                          | proportion |      |
|--------|-------|-------|----------------------------|------------|------|
| 1      | F     | 1     | Bearded Collie             | 1          | 0.05 |
| 2      | F     | 1     | Cocker Spaniel             | 1          | 0.05 |
| 3      | F     | 1     | Cross Breed                | 1          | 0.05 |
| 4      | F     | 1     | Lurcher                    | 1          | 0.05 |
| 5      | F     | 1     | Staffordshire Bull Terrier | 1          | 0.05 |
| 6      | F     | 2     | German Shepherd            | 1          | 0.05 |
| 7      | F     | 2     | Whippet                    | 1          | 0.05 |
| 8      | M     | 1     | Border Collie              | 1          | 0.05 |
| 9      | M     | 1     | Cockapoo                   | 1          | 0.05 |
| 10     | M     | 1     | Labradoodle                | 1          | 0.05 |
| 11     | M     | 1     | Labrador Retriever         | 2          | 0.10 |
| 12     | M     | 1     | Staffordshire Bull Terrier | 1          | 0.05 |
| 13     | M     | 2     | Border Collie              | 1          | 0.05 |
| 14     | M     | 2     | Boxer                      | 1          | 0.05 |
| 15     | M     | 2     | Collie X                   | 1          | 0.05 |
| 16     | M     | 2     | French Bulldog             | 1          | 0.05 |
| 17     | M     | 2     | German Shepherd            | 1          | 0.05 |
| 18     | M     | 2     | Lhasa Apso                 | 1          | 0.05 |
| 19     | M     | 2     | Staffordshire Bull Terrier | 1          | 0.05 |

CCECAI & CIBDAI scores by group

Group=1 (cor=0.98)

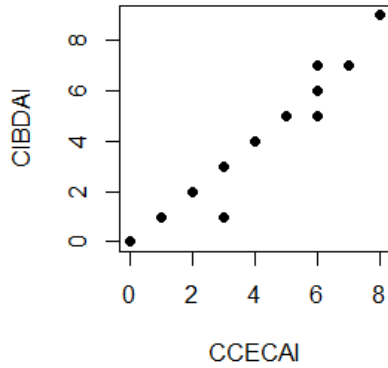

Group=2 (cor=0.98)

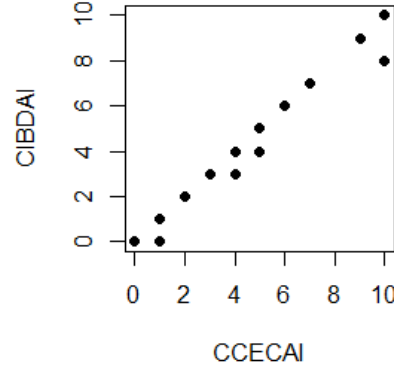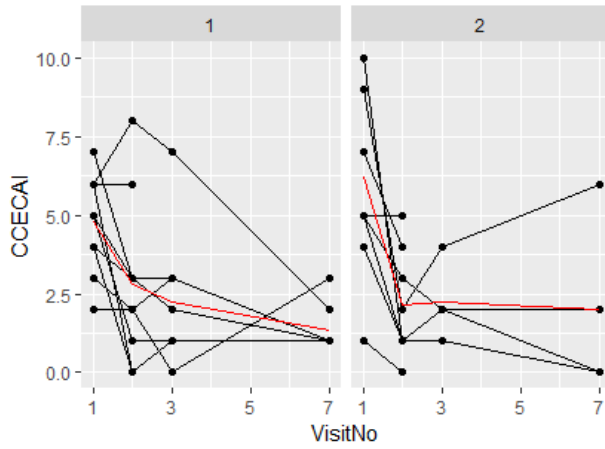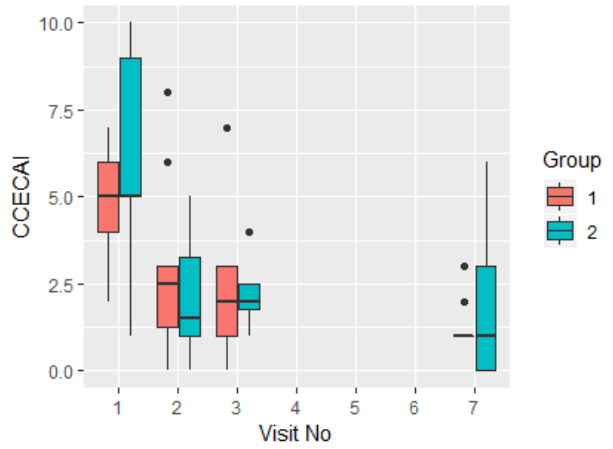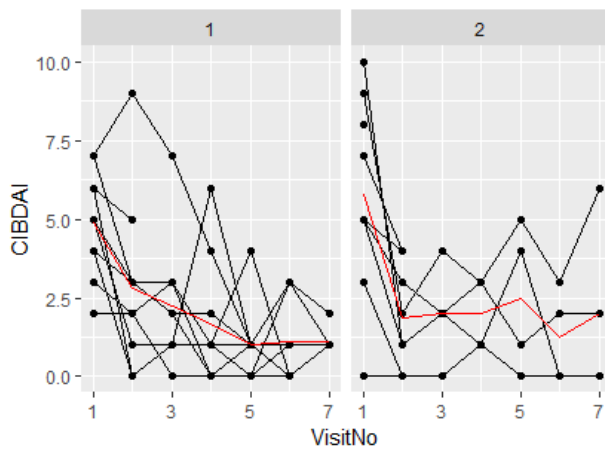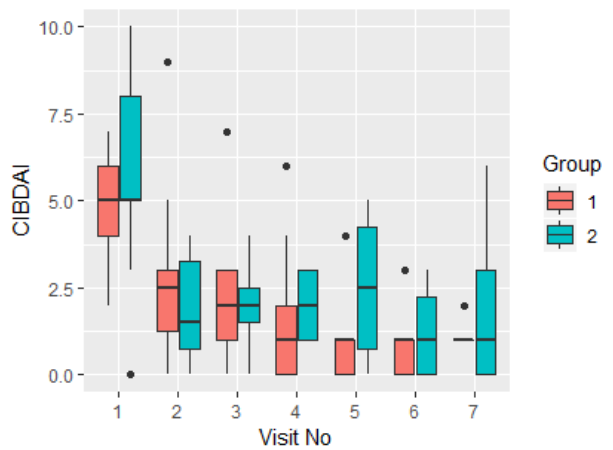

\*Two variables, CCECAI and CIBDAI, are highly correlated.

\*P-value for CIBDAI = 0.4731 (the AUCs of the two groups are not significantly different at alpha=0.05)

**Endoscopy Scores by group (Visit No = 1,3)**

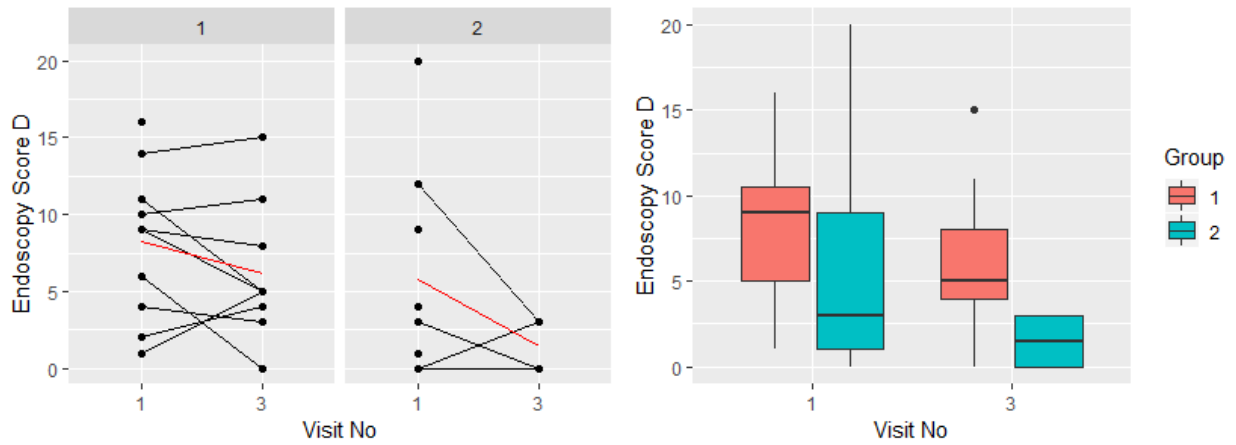

P-value=0.5641 (the interaction between Visit No and Group type is not significant at  $\alpha = 0.05$ )

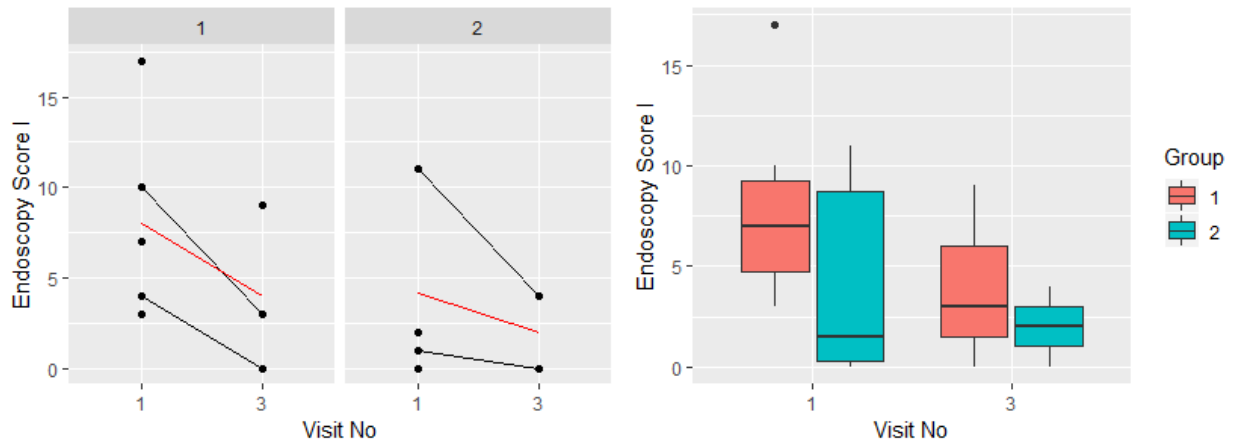

P-value=0.7381 (the interaction between Visit No and Group type is not significant at  $\alpha = 0.05$ )

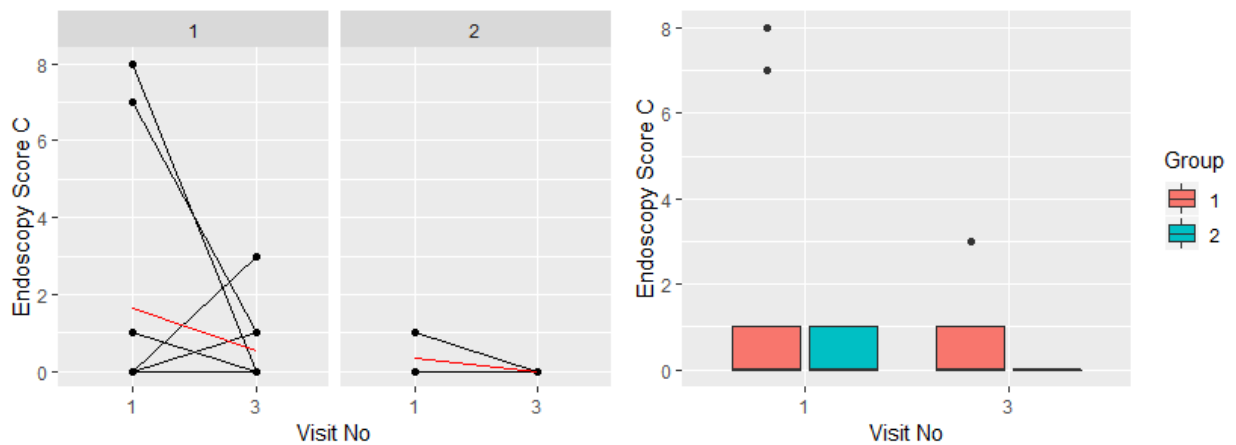

P-value=0.5897 (the interaction between Visit No and Group type is not significant at  $\alpha = 0.05$ )

WSAVA scores by group (Visit No = 1,3)

TOTAL = SFSubTotal + SASubTotal + DSubTotal + ISubTotal + CSubTotal

### SF SubTotal

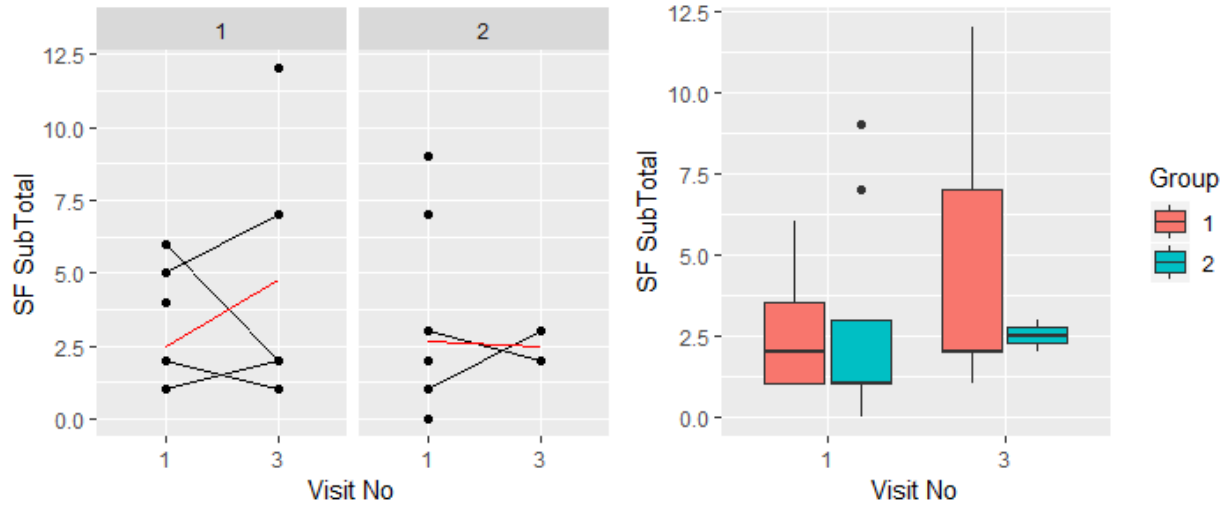

P-value = 0.4004

(the interaction between Visit No and Group type is not statistically significant at  $\alpha = 0.05$ )

### SA SubTotal

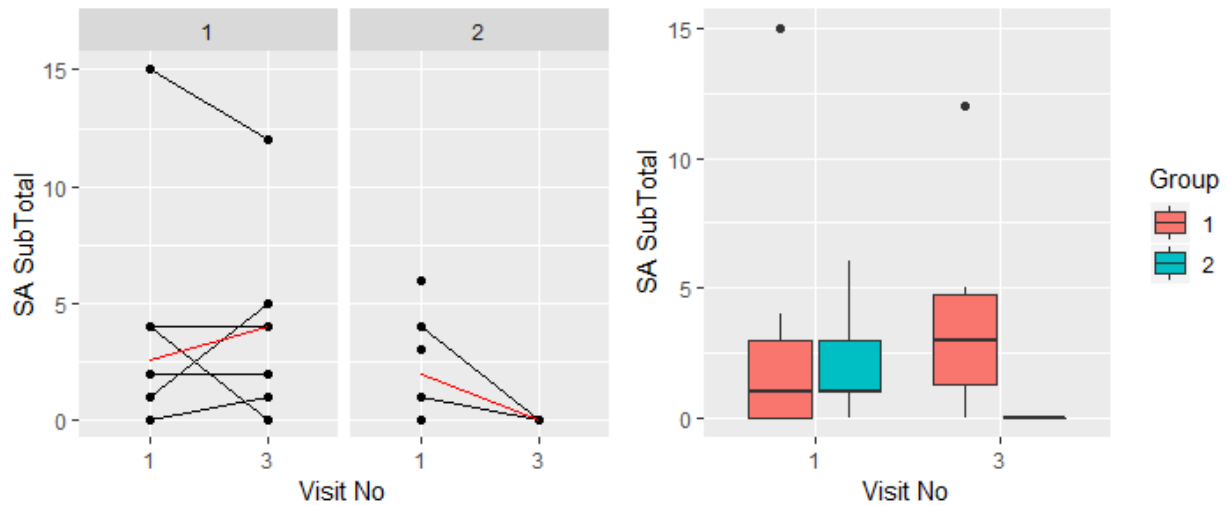

P-value = 0.3178

(the interaction between Visit No and Group type is not statistically significant at  $\alpha = 0.05$ )

### D SubTotal

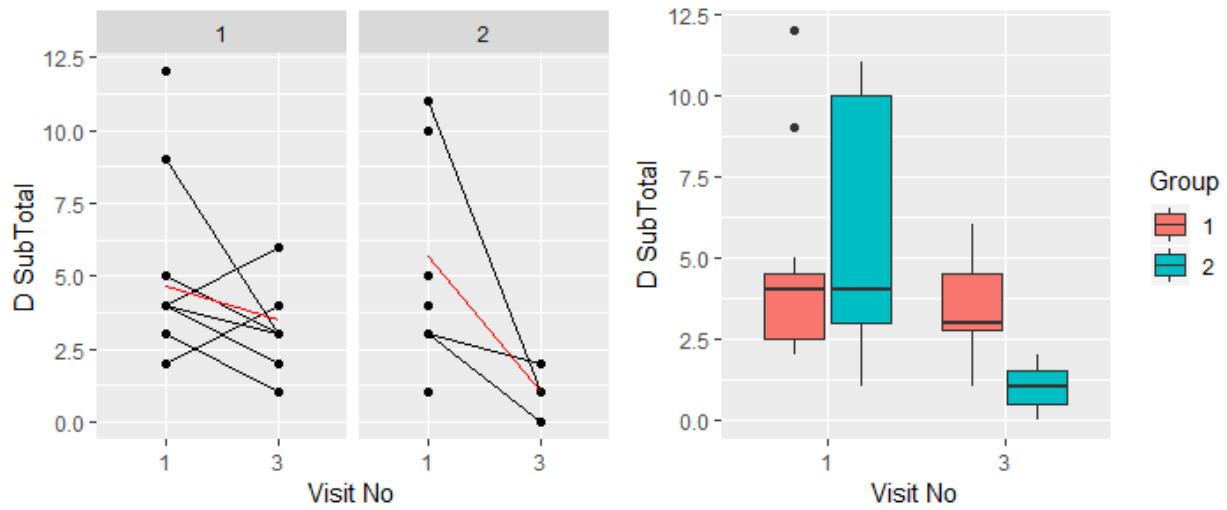

P-value = 0.1487

(the interaction between "Visit No" and "Group" type is not statistically significant at  $\alpha = 0.05$ )

### I SubTotal

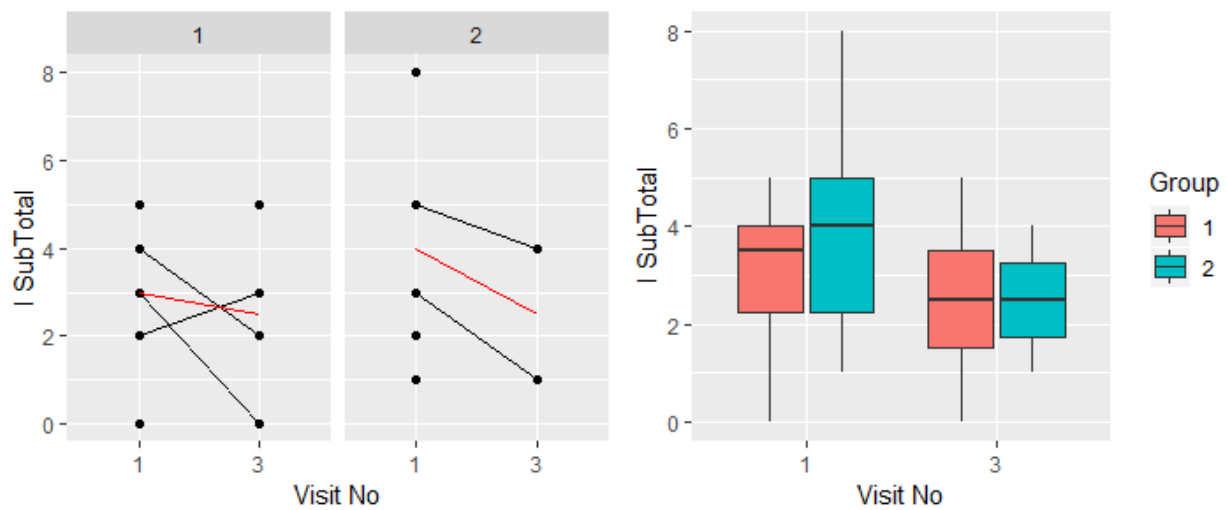

P-value = 0.6637

(the interaction between "Visit No" and "Group" type is not statistically significant at  $\alpha = 0.05$ )

**C SubTotal**

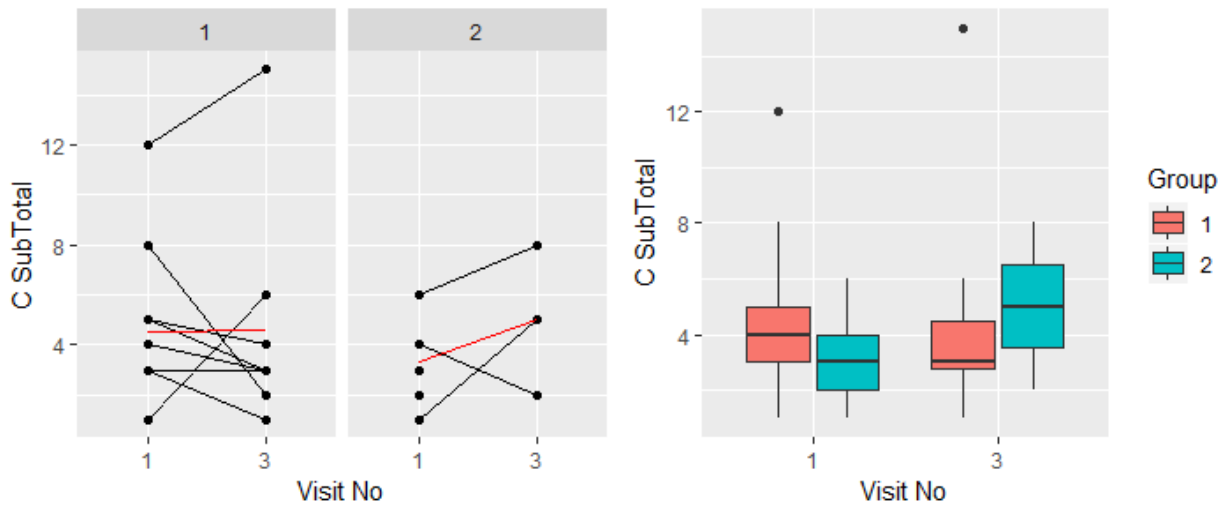

P-value = 0.5511

(the interaction between "Visit No" and "Group" type is not statistically significant at  $\alpha = 0.05$ )

**TOTAL=SF SubTotal + SA SubTotal + D SubTotal + I SubTotal + C SubTotal**

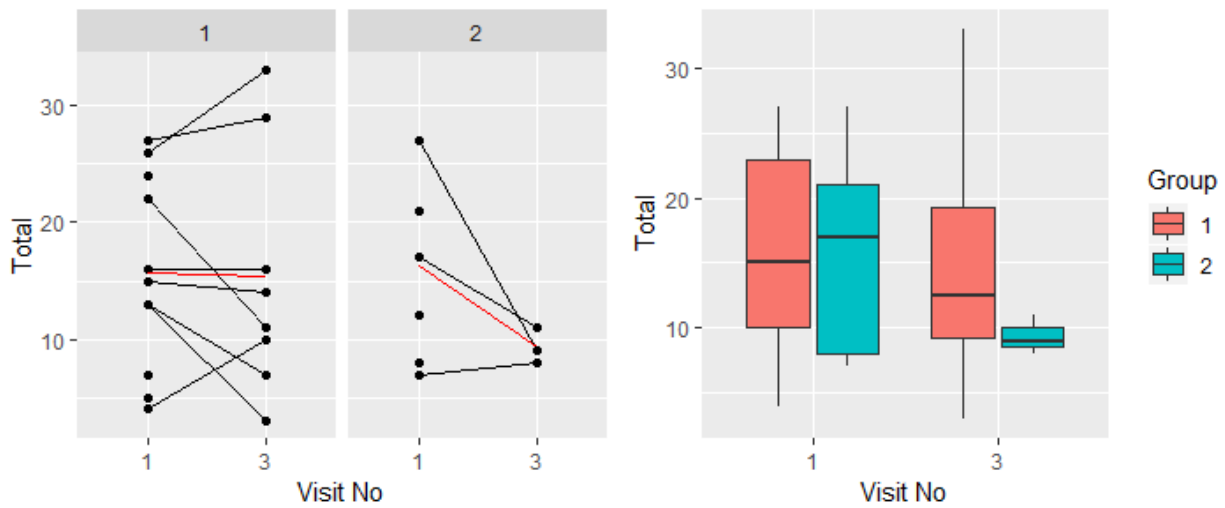

P-value = 0.3430

(the interaction between "Visit No" and "Group" type is not statistically significant at  $\alpha = 0.05$ )

cPLI ug/l (cPLI serum concentration) by group (Visit No = 1 ONLY)

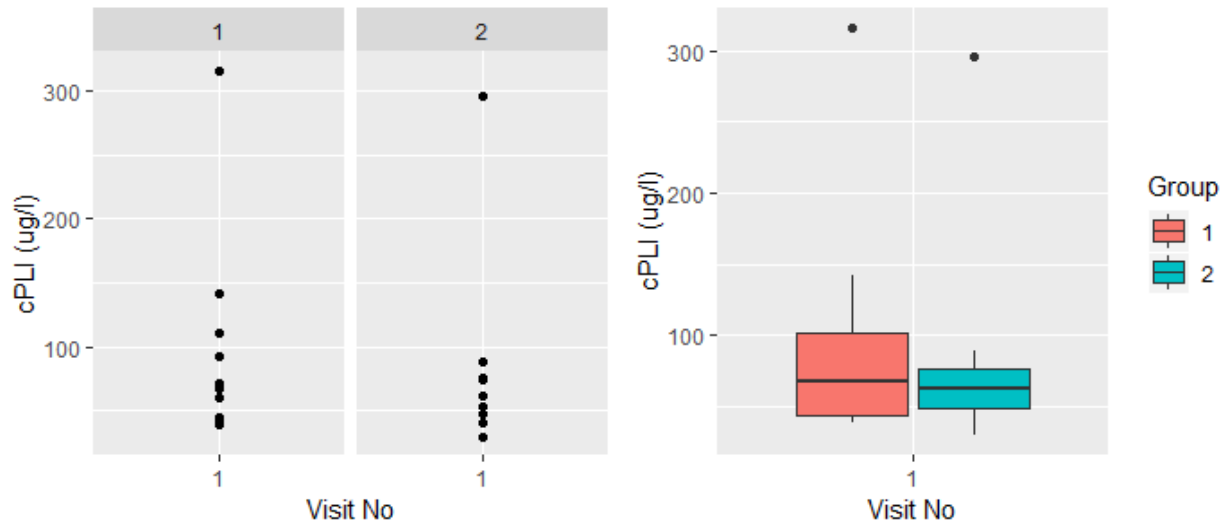

P-value = 0.8265 (no significant difference between two groups at  $\alpha = 0.05$ )

# cPLI, Outliers removed (RVB05, RVB32)

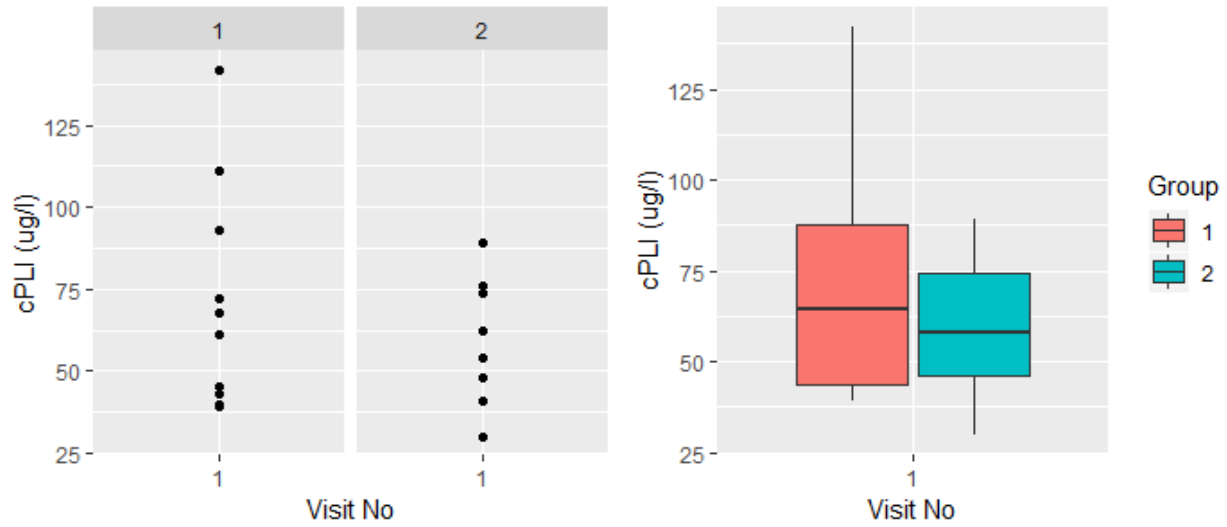

P-value = 0.3894 (no significant difference between two groups at  $\alpha = 0.05$ )



TLI ug/l (TLI serum concentration) by group (Visit No = 1 ONLY)

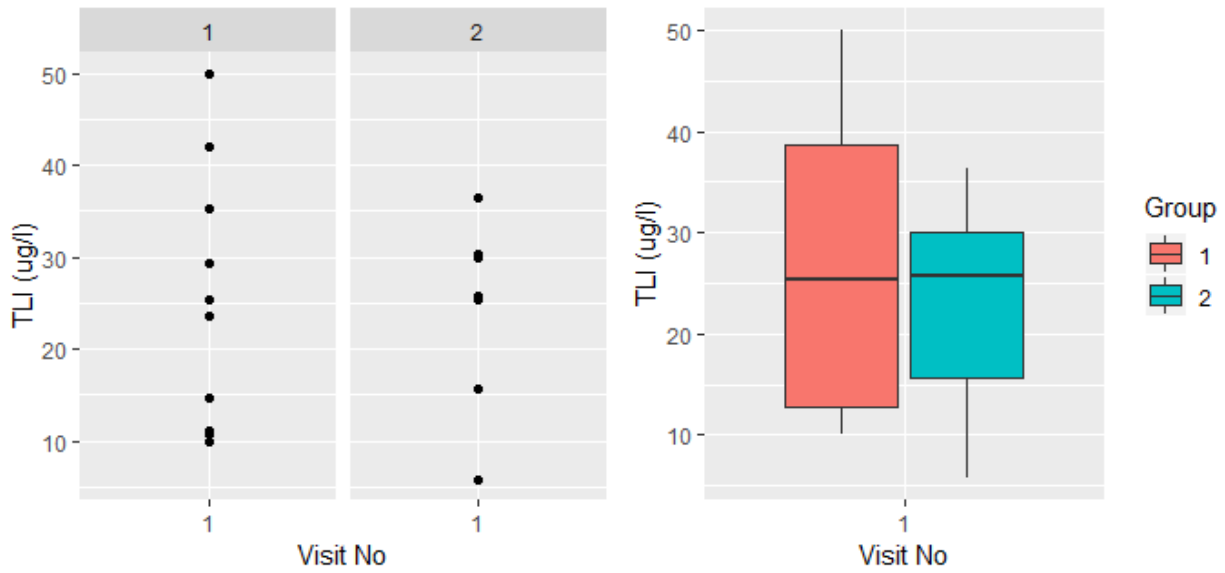

P-value = 0.5503 (no significant difference between two groups at  $\alpha = 0.05$ )

Alb g/l (serum albumin concentration) by group

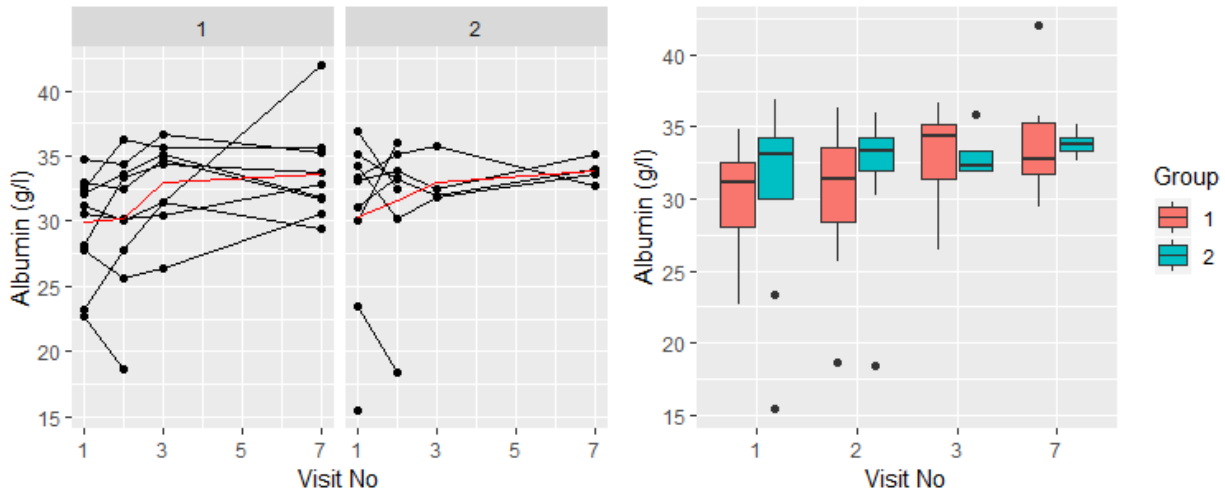

P-value = 0.1132 (no significant difference between two groups at  $\alpha = 0.05$ )

**Glob g/l (serum globulin concentration) by group**

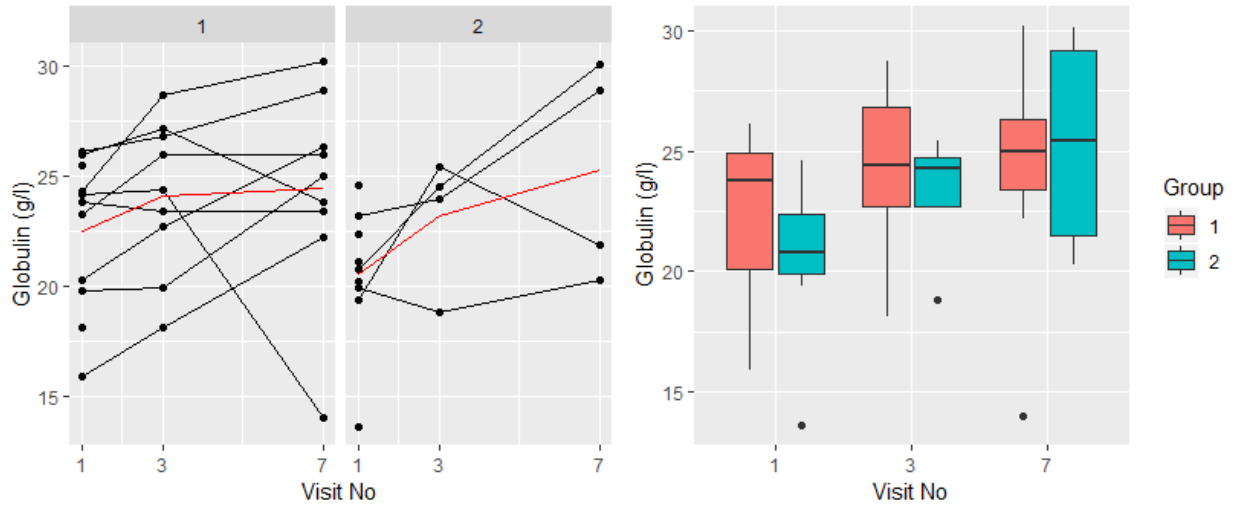

P-value = 0.7952 (no significant difference between two groups at  $\alpha = 0.05$ )

**Folate ng/ml (serum folate concentration) by group**

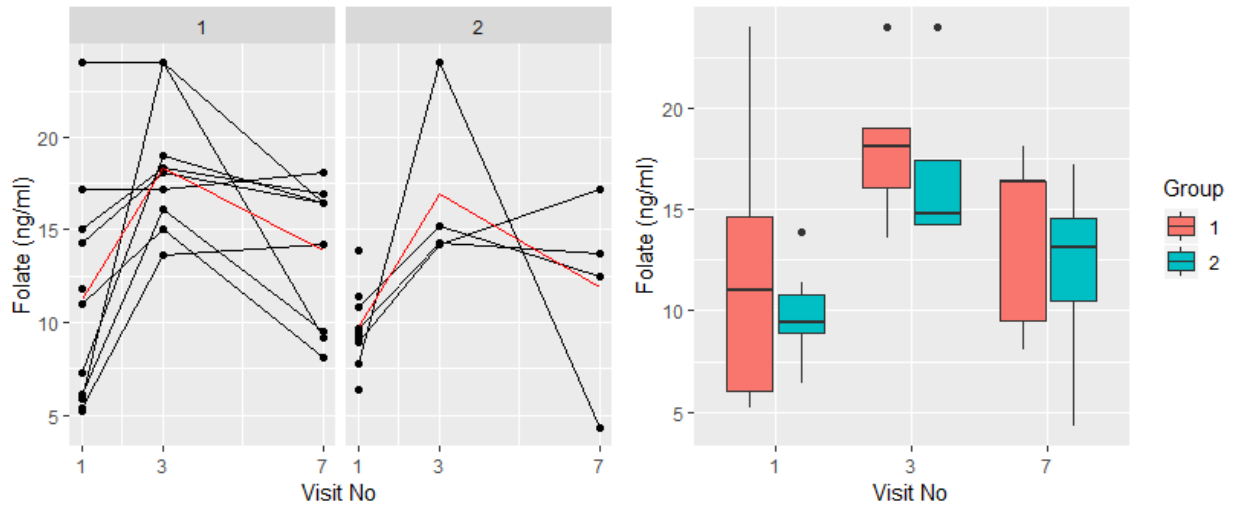

P-value = 0.2390 (no significant difference between two groups at  $\alpha = 0.05$ )

### Cobal ng/l (serum cobalamin concentration) by group

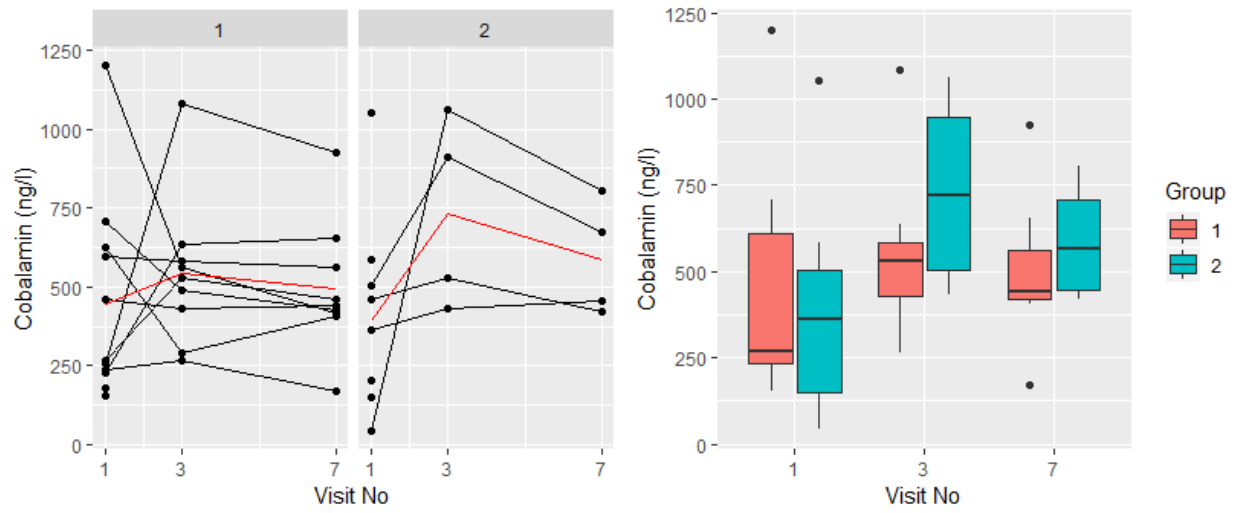

P-value = 0.3913 (no significant difference between two groups at  $\alpha = 0.05$ )

Correlations of all endoscopy score with CCECAI, CIBDAI and WSAVA scores "by Group"

Group=1

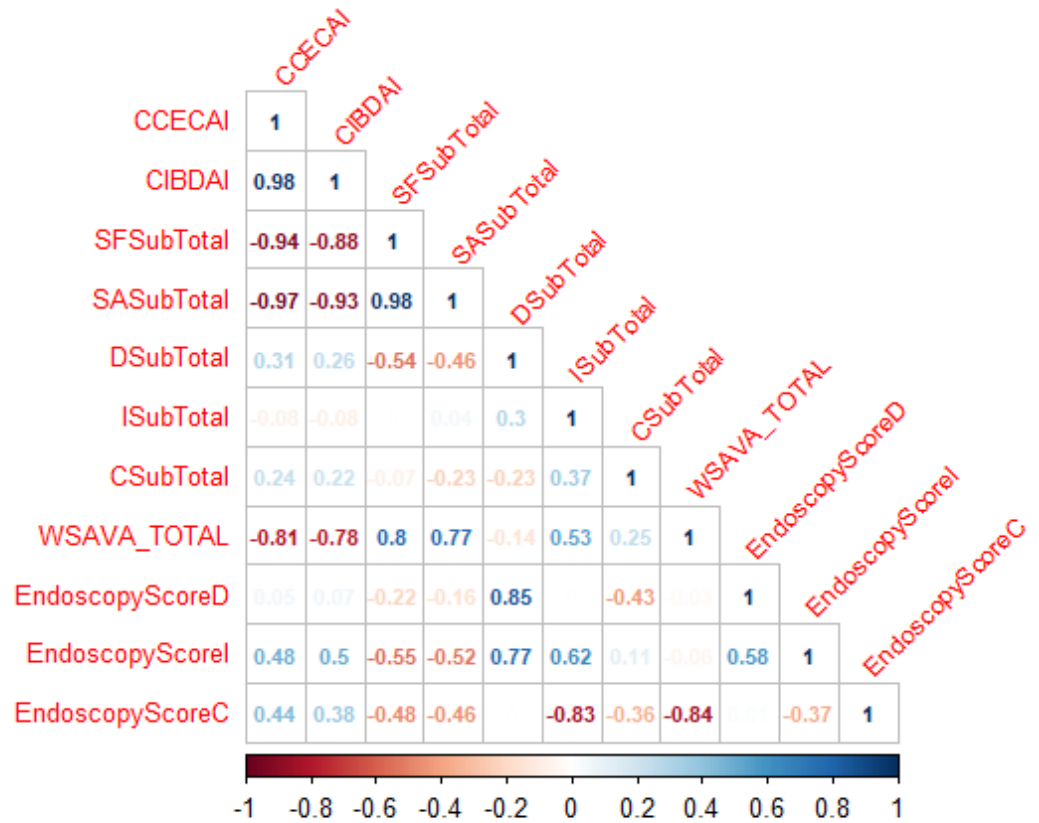

Group=2

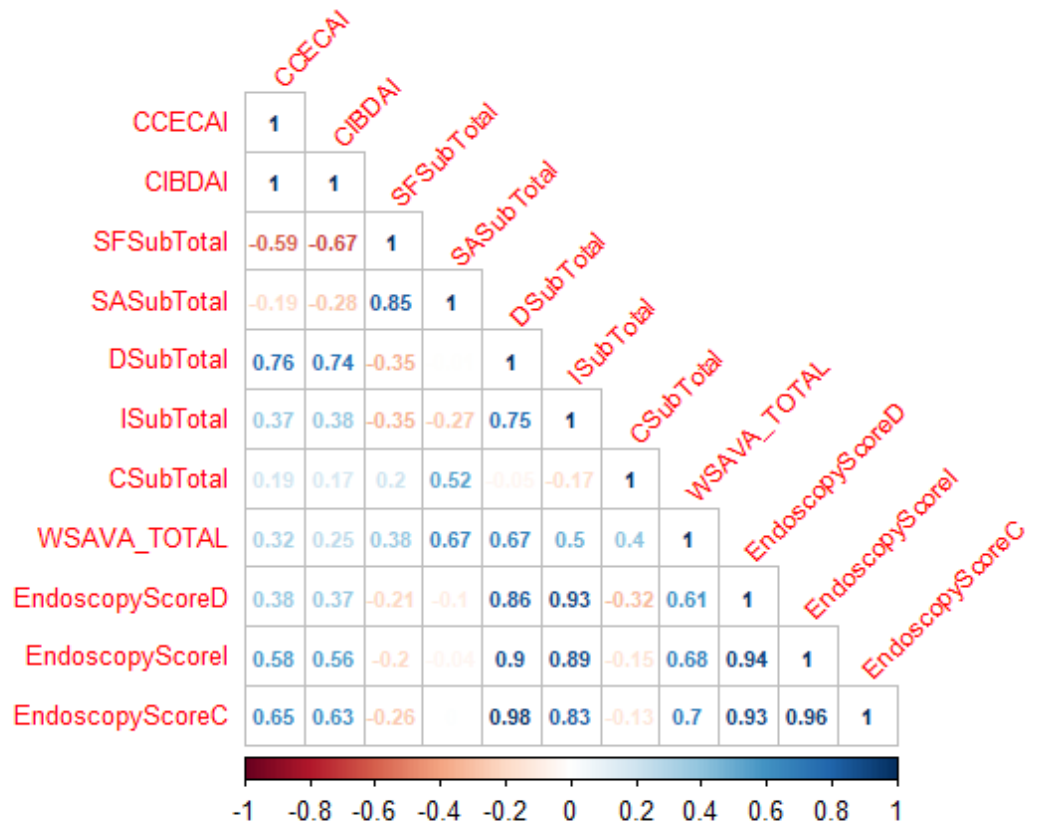

GROUP=1 & 2 Combined

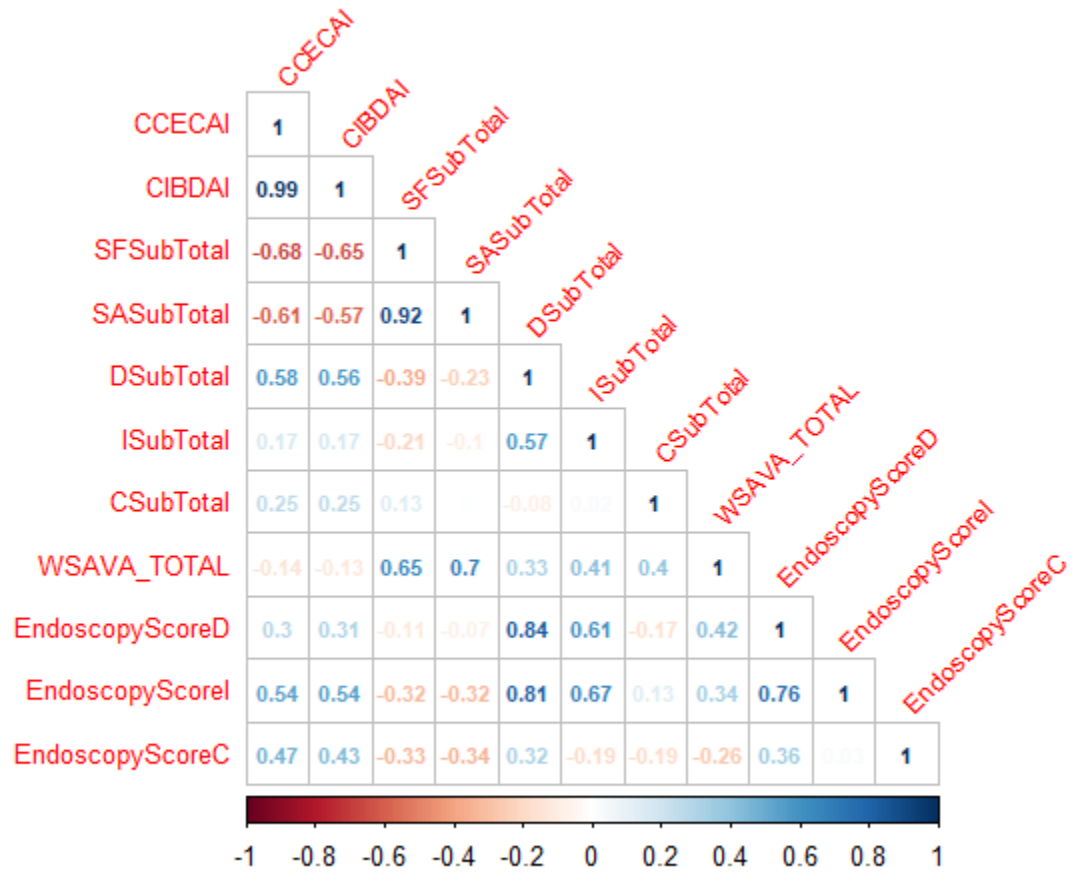

Serum albumin & cobalamin concentration with CCECAI, CIBDAI and WSAVA scores "by Group"

Group=1

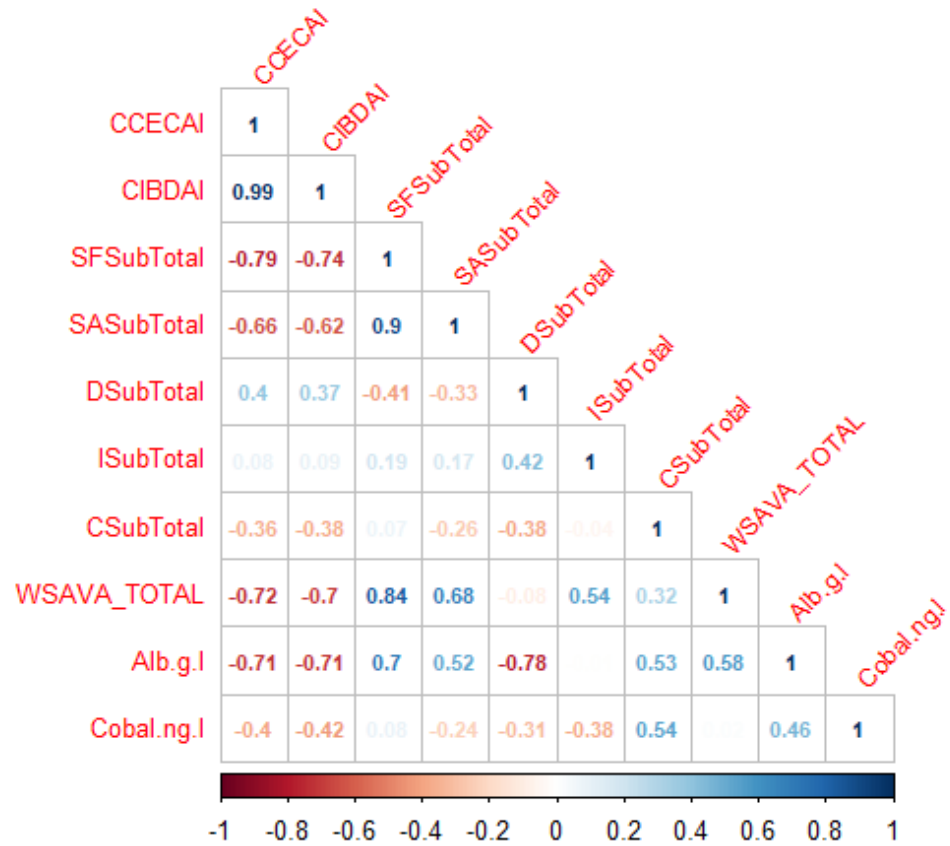

Group=2

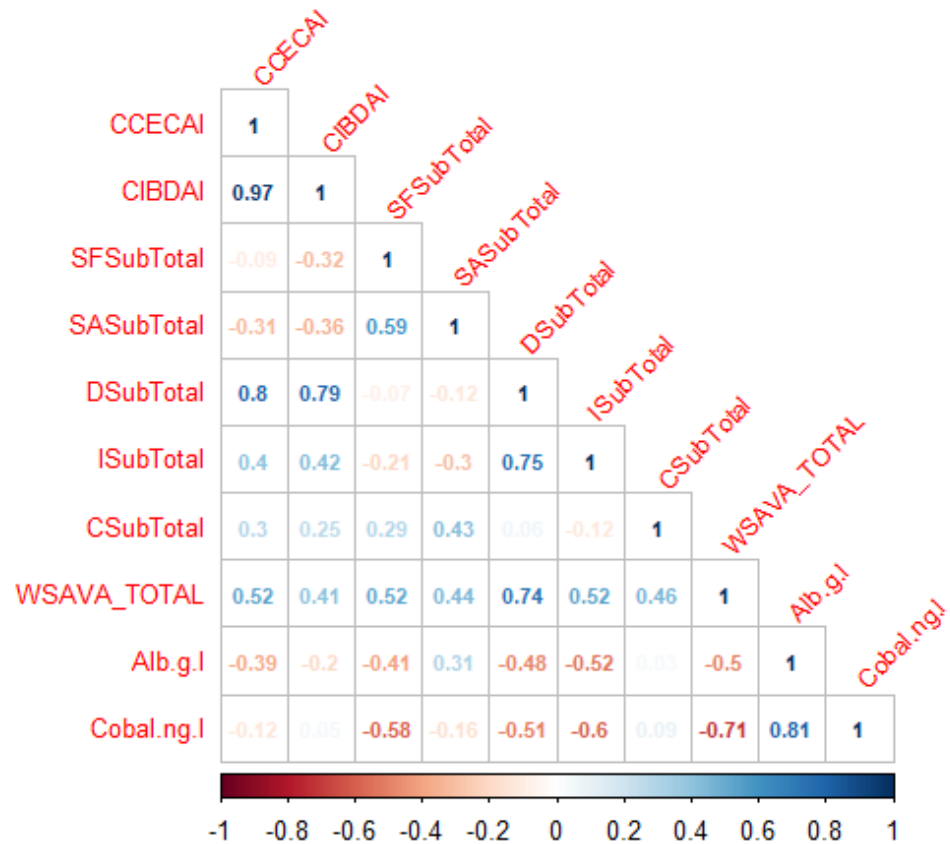

GROUP=1 & 2 Combined

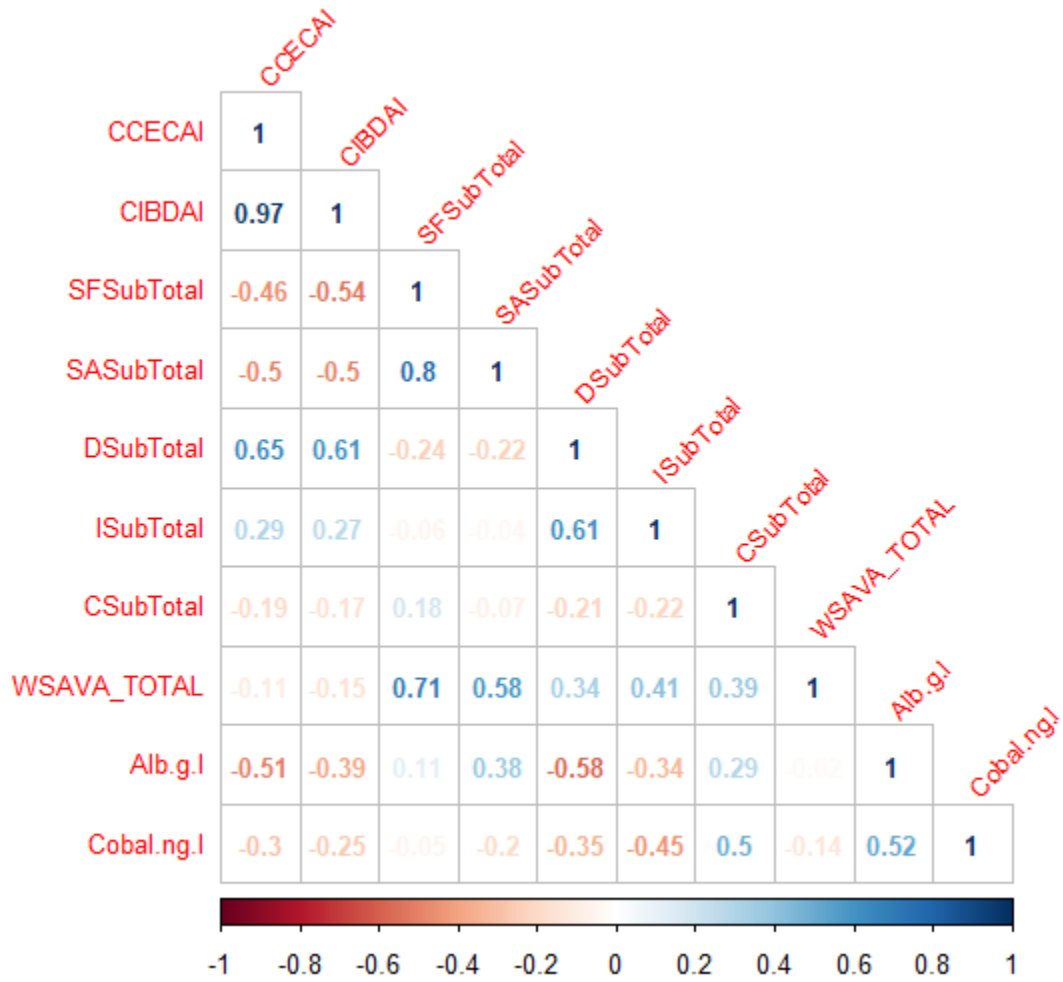

Supplement: pone.0250681.s002.pdf [file pone.0250681.s002.pdf]
