# Supplementary material for: Clinical efficacy of prebiotics and glycosaminoglycans versus placebo In dogs with food responsive enteropathy receiving a hydrolyzed diet: A pilot study
Source: PubMed Central journal article supplement (PMC8530283; doi:10.1371/journal.pone.0250681), 2021-10-21
Supplement: pone.0250681.s003.pdf [file pone.0250681.s003.pdf]

**SCFA Bioiberica dogs (with 14 dogs total, 9 dogs in Trt 1 and 5 dogs in Trt 2)**

**Raw data**

**Normalized with Internal standard**

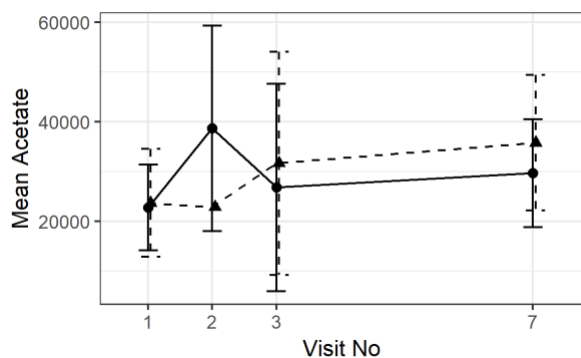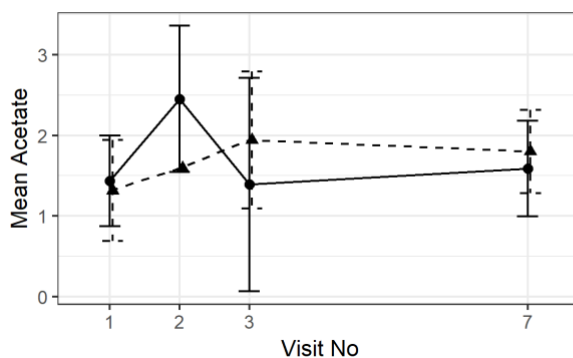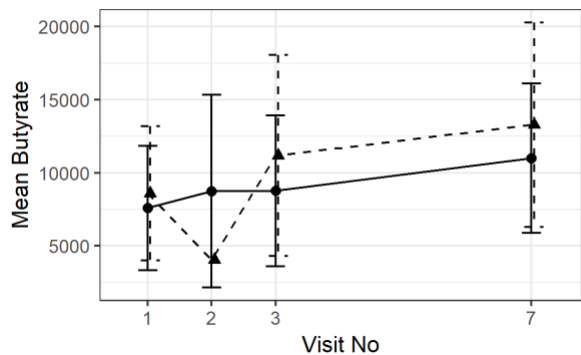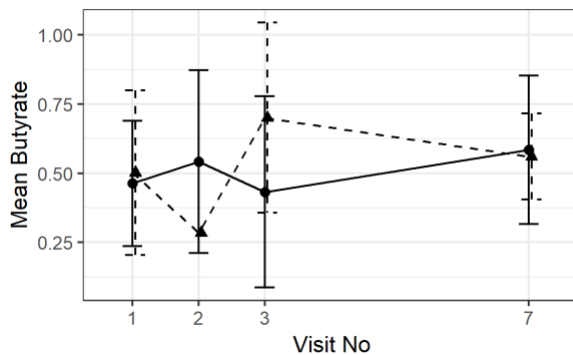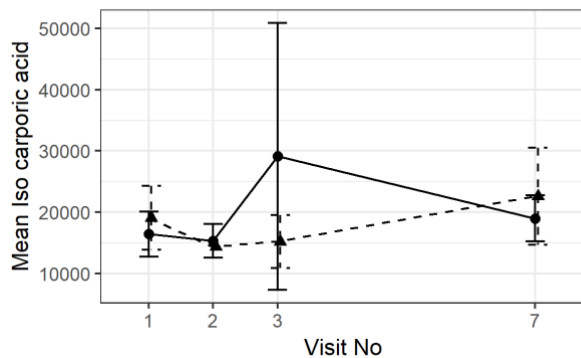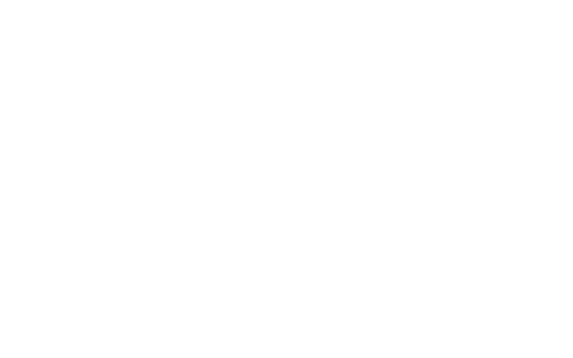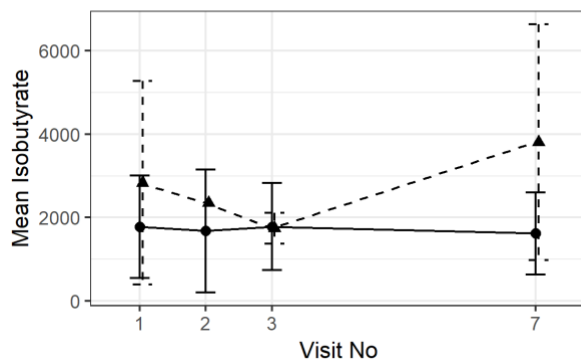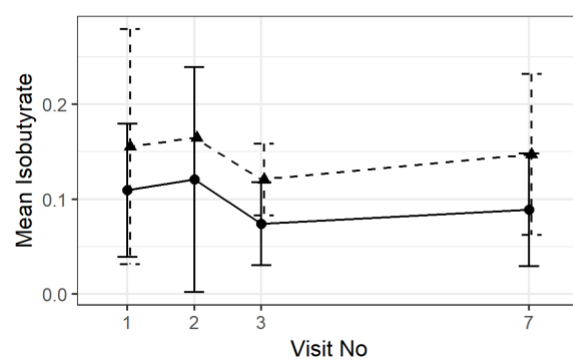

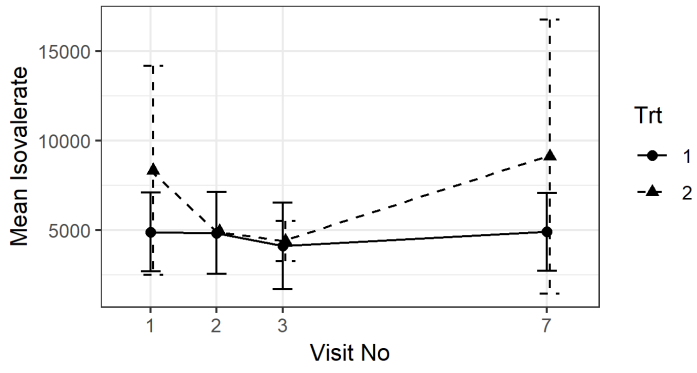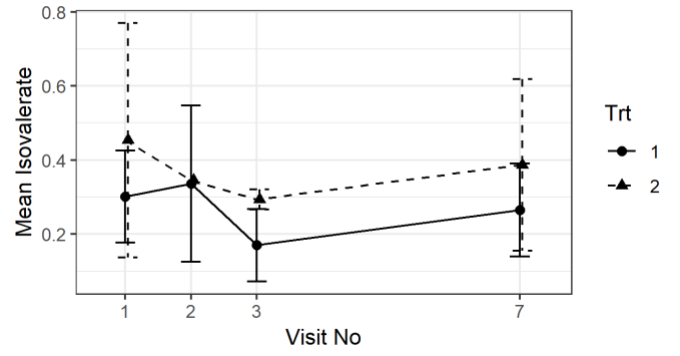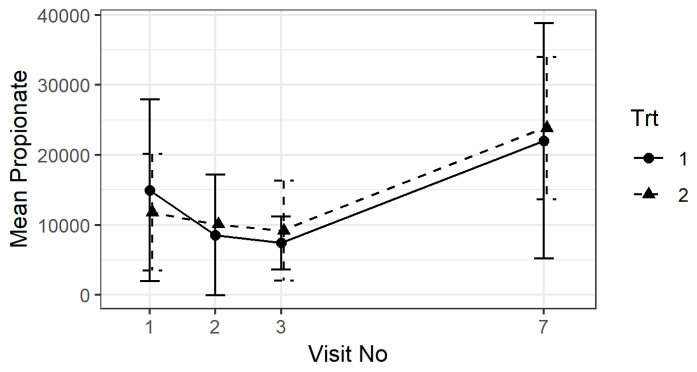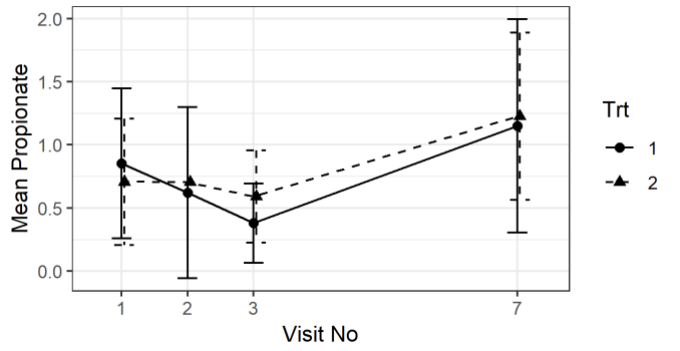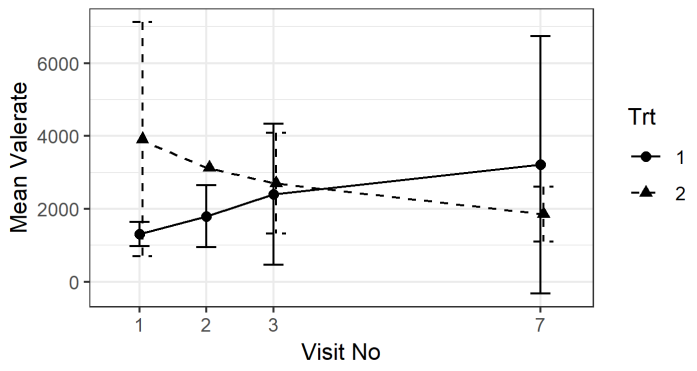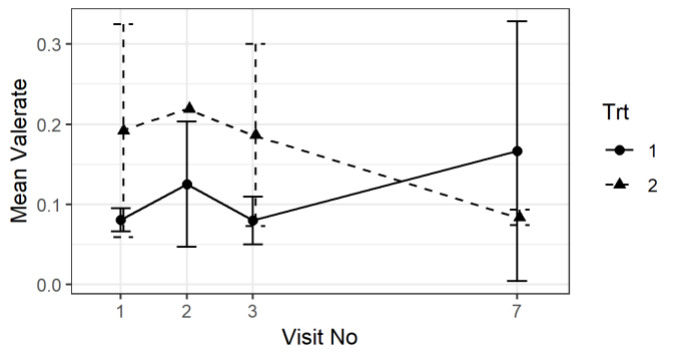

1. Visits 1 and 2 are not used for comparisons since there is only one dog (Woody) in Trt=2, measured at Visit=2.

## 2. Visits=1, 3: Trt 1 vs Trt 2 (Raw data)

Testing for significant interaction using ANCOVA (one-way)

Raw data

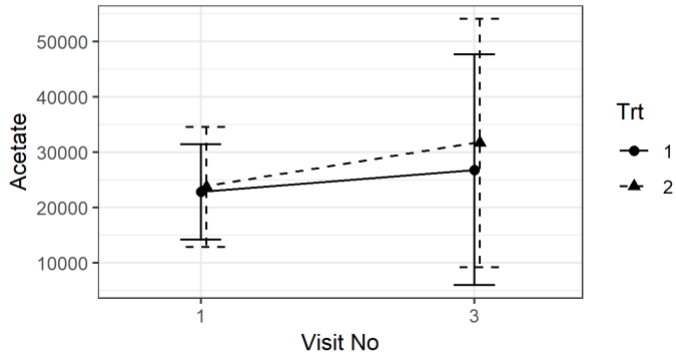

p-value = 0.7955

Normalized with Internal standard

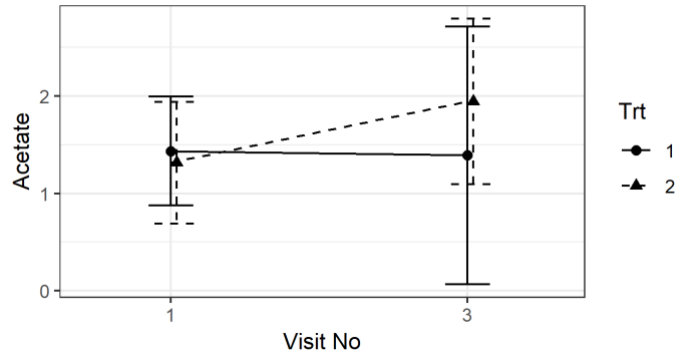

p-value = 0.4215

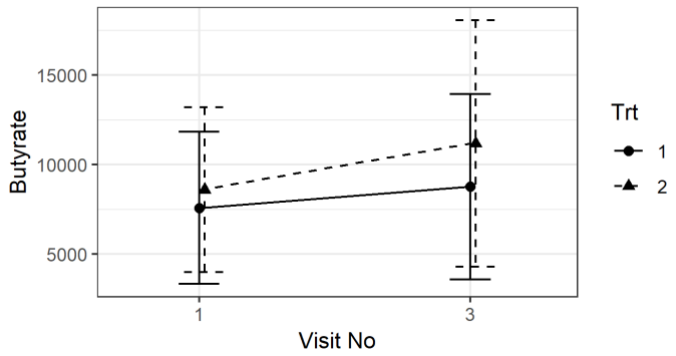

p-value = 0.7670

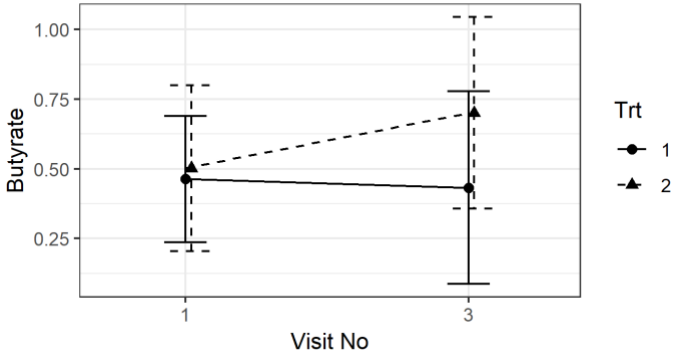

p-value = 0.4104

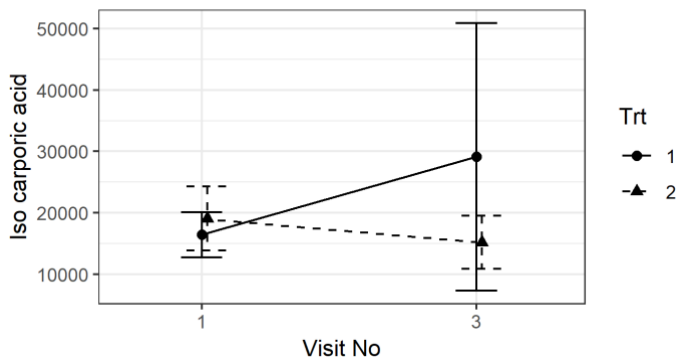

p-value = 0.1483

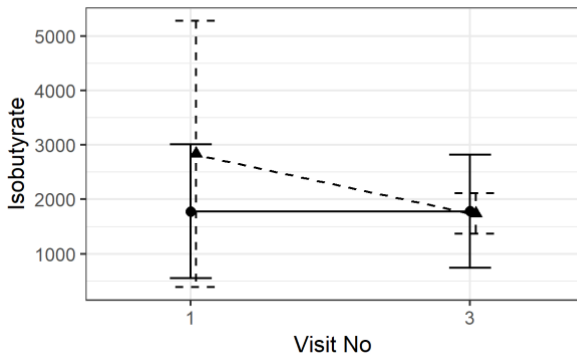

p-value = 0.3751

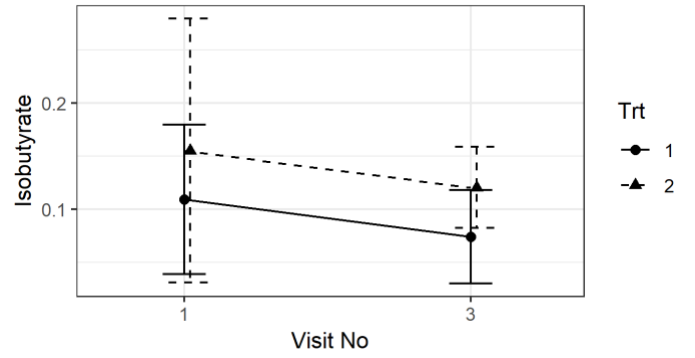

p-value = 0.9925

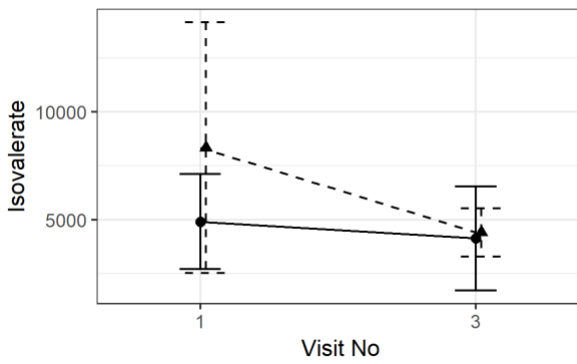

p-value = 0.2611

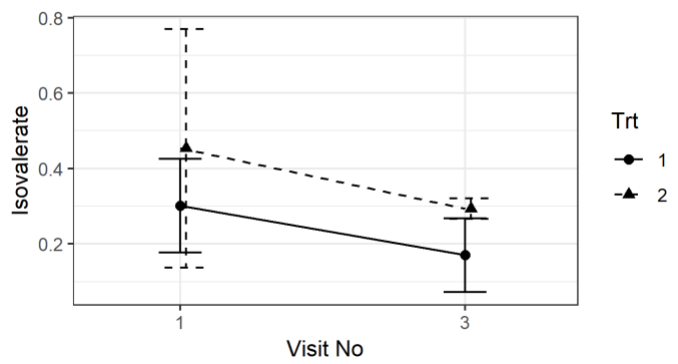

p-value = 0.8414

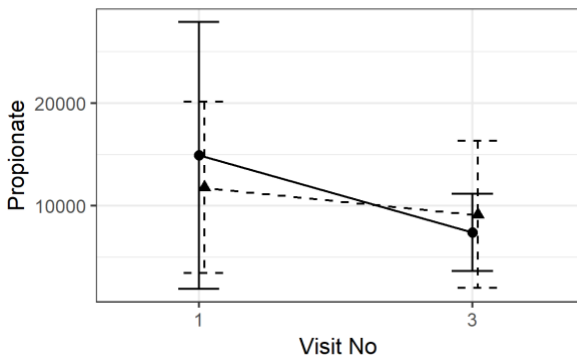

p-value = 0.5422

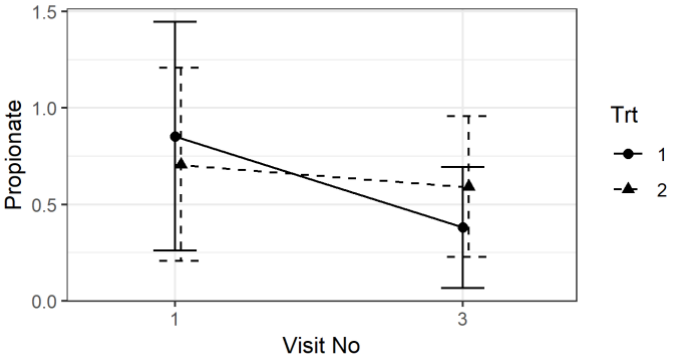

p-value = 0.3868

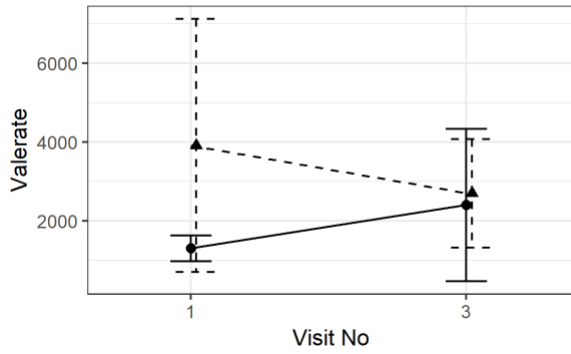

p-value = 0.1753

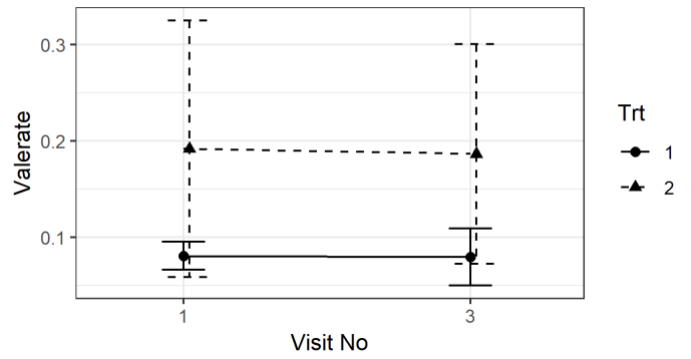

p-value = 0.9520

No significant interaction between treatment and visit No for all variables

### 3. Visits=3, 7: Trt 1 vs Trt 2 (Raw data)

Testing for significant interaction using ANCOVA (one-way)

Raw data

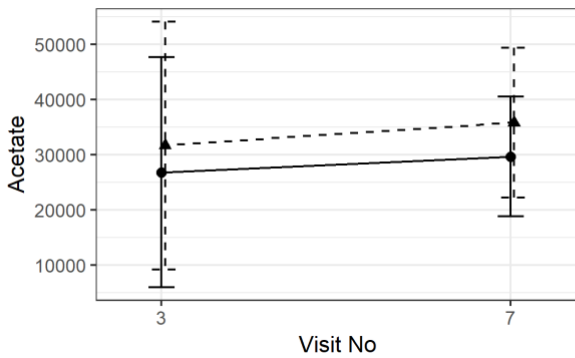

p-value = 0.9298

Normalized with Internal standard

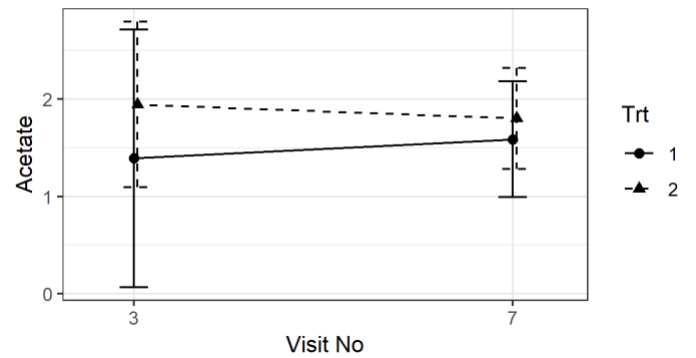

p-value = 0.6545

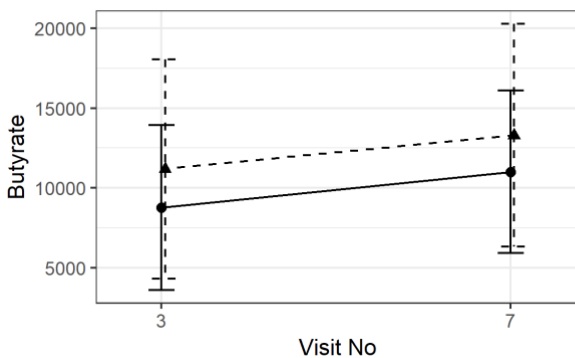

p-value = 0.9791

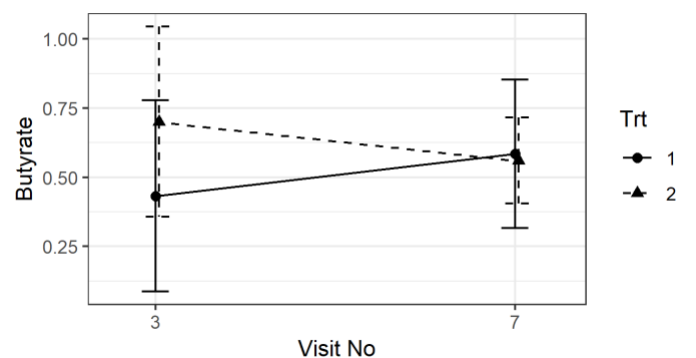

p-value = 0.2568

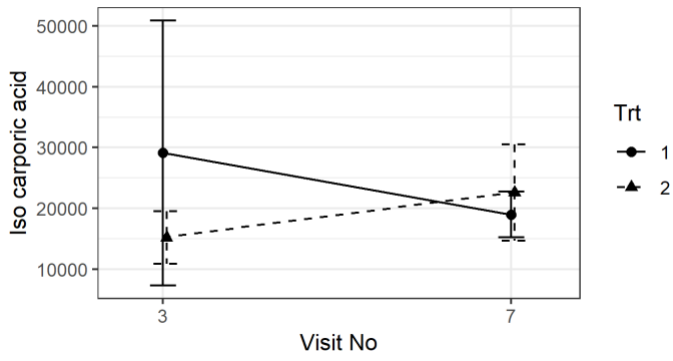

p-value = 0.0955

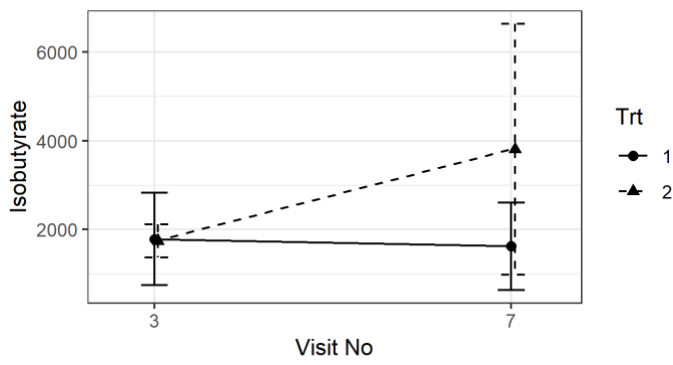

p-value = 0.0713

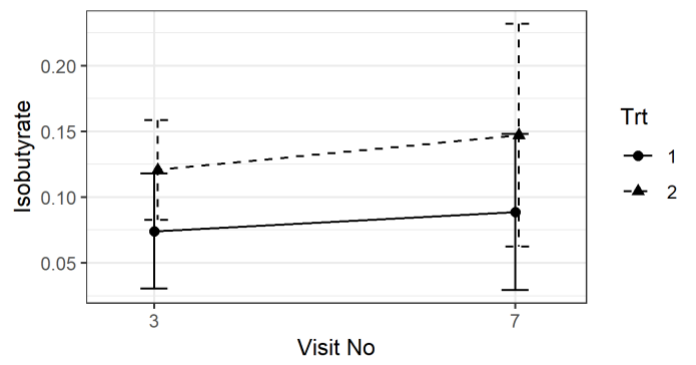

p-value = 0.8094

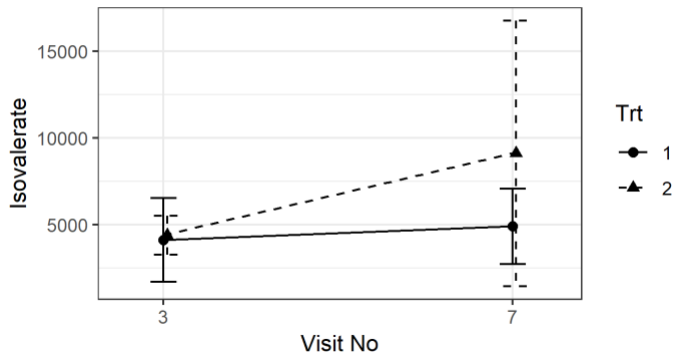

p-value = 0.2058

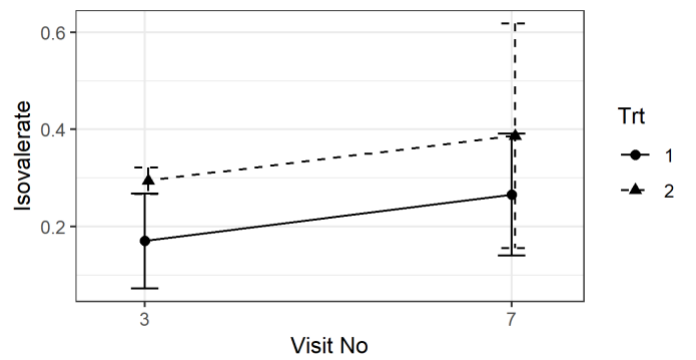

p-value = 0.9793

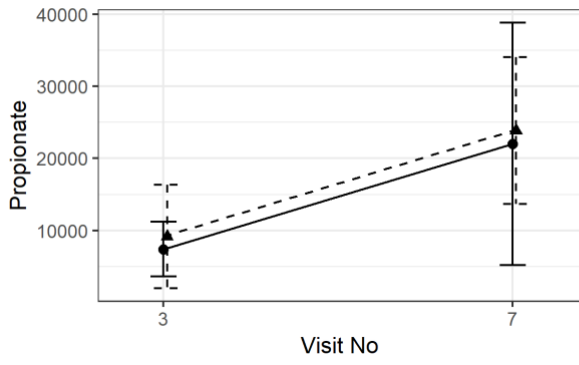

p-value = 0.9941

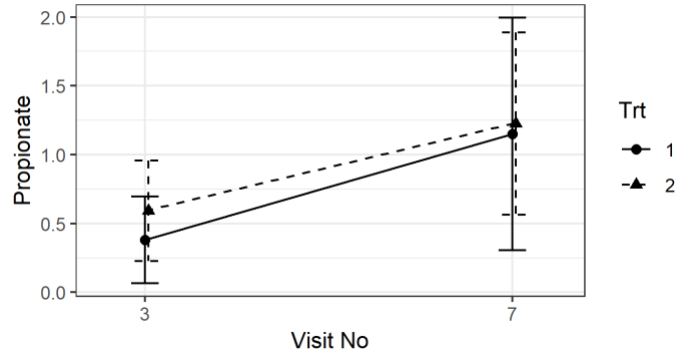

p-value = 0.8036

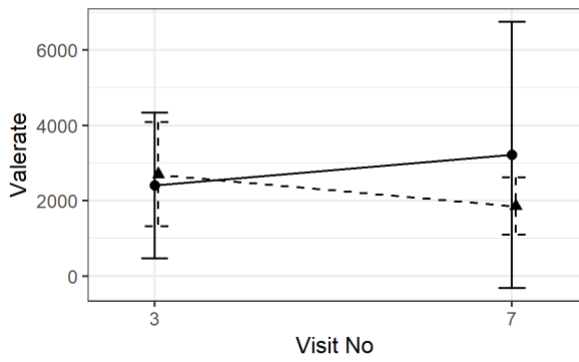

p-value = 0.4524

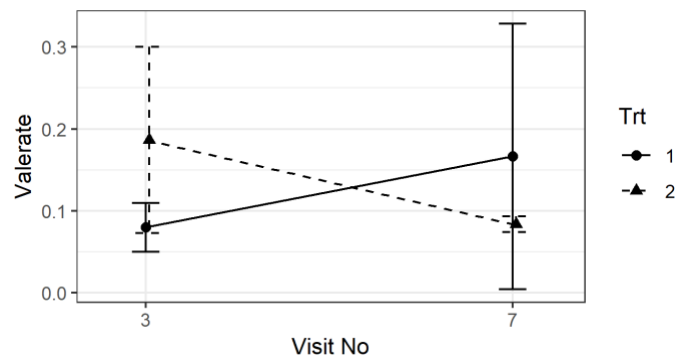

p-value = 0.0689

No significant interaction between treatment and visit No for all variables
